# Supplementary material for: Peopling History of the Tibetan Plateau and Multiple Waves of Admixture of Tibetans Inferred From Both Ancient and Modern Genome-Wide Data
Source: Front Genet. 2021 Sep 3;12:725243. doi: 10.3389/fgene.2021.725243 (PMC8506211; doi:10.3389/fgene.2021.725243)
Supplement: Supplementary file 5 [file Data_Sheet_5.xlsx]

## Sheet: Table S1
Table S1. Pairwise Fst genetic distance between eleven modern Tibetans and other 71 worldwide reference populations.
Populations	Tubalar	Altaian	Bashkir_south	Bashkir_central	Bashkir_north	Buryat_Aginsky	Karelian	Karakalpak	Kazakh	Mordovian	Mongol_Uuld	Nogai2	Tatar_Siberian	Tatar_Kazan	Tatar_Mishar	Chuvash	Tuvinian	Udmurt	Yukagir	Nganasan	Mbuti	Yakut_HGDP	Tujia_HGDP	Yi_HGDP	Miao_HGDP	Uyghur_HGDP	Dai_HGDP	She_HGDP	Tu_HGDP	Kalmyk	Selkup	Atayal	Ami	Thai	Dusun	Kankanaey	Murut	Tofalar	Vietnamese	Tibetan_Gannan	Maonan_Huanjiang	Zhuang_Guangxi	Gelao_Longlin	Baoan_Jishishan	Yugur_Sunan	Kyrgyz_Urumqi	Dong_Guizhou	Tibetan_Chamdo	Mulam_Luocheng
Tubalar	0	0.018574	0.0243891	0.027403	0.0308231	0.029007	0.0509802	0.0193736	0.0186495	0.0483428	0.0248076	0.0184796	0.0198223	0.0347247	0.0414381	0.0357251	0.0261227	0.038927	0.0332189	0.0671162	0.221975	0.0368145	0.0469013	0.0458753	0.051028	0.0194091	0.0549314	0.0553786	0.0363272	0.0235908	0.0355148	0.0996573	0.0742012	0.0494953	0.0665882	0.084576	0.0727287	0.0487699	0.0505716	0.0367241	0.0571736	0.0533592	0.0560205	0.0379157	0.038597	0.0198637	0.053266	0.046019	0.0556517
Altaian	0.018574	0	0.019548	0.0262562	0.0308727	0.00940525	0.0563705	0.009964	0.00703765	0.0535387	0.00626286	0.0100258	0.0142933	0.0363833	0.0440834	0.0363019	0.00709451	0.0391248	0.0167116	0.0459065	0.219189	0.0180237	0.025953	0.02505	0.0305167	0.011446	0.0354345	0.0346549	0.0169465	0.00690324	0.02684	0.0812995	0.0542558	0.0316065	0.0481067	0.0650218	0.0539946	0.0298236	0.0310673	0.0172469	0.0371854	0.0335592	0.0360529	0.0190084	0.01835	0.00692957	0.0328121	0.0254137	0.0355739
Bashkir_south	0.0243891	0.019548	0	0.00378327	0.0067822	0.0297833	0.0223633	0.00708567	0.00996993	0.0200966	0.0245514	0.00677736	0.00492744	0.00959159	0.0141689	0.0113352	0.0277389	0.015243	0.031851	0.0714294	0.206428	0.0394665	0.0509714	0.049503	0.0547825	0.00811864	0.0572055	0.0588419	0.0384827	0.0227661	0.0281605	0.101484	0.0758708	0.0506274	0.0669097	0.0861614	0.0738416	0.0502234	0.0528307	0.0366869	0.0604967	0.0569543	0.0585312	0.0392858	0.0415987	0.0137032	0.0564378	0.0501153	0.0588606
Bashkir_central	0.027403	0.0262562	0.00378327	0	0.00129431	0.0390038	0.0121634	0.00871513	0.0134957	0.00989745	0.0330403	0.00827093	0.00532612	0.00252425	0.00609734	0.00466455	0.0360162	0.0092371	0.0398305	0.0825623	0.203811	0.0494267	0.0612173	0.0597235	0.0648373	0.00958085	0.0665354	0.0694854	0.0480629	0.0308451	0.033194	0.111047	0.0854594	0.0596222	0.0760166	0.0960196	0.0828325	0.059182	0.0620129	0.0453818	0.0708021	0.0671498	0.0684878	0.0484914	0.0519239	0.0188661	0.0667723	0.0604684	0.0690758
Bashkir_north	0.0308231	0.0308727	0.0067822	0.00129431	0	0.0449375	0.00974762	0.0121318	0.0172773	0.00730572	0.038918	0.0107314	0.00731532	0.00145242	0.00483701	0.0042127	0.041401	0.00806737	0.0447418	0.0888815	0.205725	0.0551855	0.0682072	0.0664826	0.0719238	0.0125139	0.0731516	0.0762665	0.0547485	0.036294	0.0365635	0.116468	0.0918056	0.0654398	0.0817323	0.101652	0.0884885	0.0640866	0.0689829	0.0523542	0.0771016	0.0736839	0.075095	0.0547006	0.0581911	0.0232769	0.073416	0.066916	0.0758752
Buryat_Aginsky	0.029007	0.00940525	0.0297833	0.0390038	0.0449375	0	0.075498	0.0127284	0.00785362	0.0726109	0.00248522	0.0160081	0.0227454	0.0520913	0.0611257	0.0515401	0.00750018	0.0547963	0.0141287	0.0405806	0.230043	0.0120704	0.0208587	0.0202341	0.0258927	0.0177301	0.0320578	0.0304813	0.0133831	0.00305246	0.0320752	0.0819605	0.0518585	0.0289366	0.0459707	0.0637289	0.0528275	0.0322163	0.0276686	0.0150109	0.0329709	0.0290163	0.0324918	0.0162059	0.013753	0.00909417	0.0282064	0.0209905	0.0311121
Karelian	0.0509802	0.0563705	0.0223633	0.0121634	0.00974762	0.075498	0	0.0309088	0.038677	0.00573394	0.0686033	0.0290252	0.0239682	0.00768399	0.00766529	0.0112883	0.0701593	0.0196126	0.0727142	0.12286	0.217948	0.0857732	0.100584	0.0982571	0.104145	0.0320911	0.104008	0.10831	0.0854954	0.0647211	0.0601314	0.148357	0.12297	0.0947414	0.11206	0.133424	0.119043	0.0938923	0.100149	0.0828996	0.108385	0.104721	0.106099	0.0848042	0.089345	0.0471903	0.104793	0.0982425	0.107158
Karakalpak	0.0193736	0.009964	0.00708567	0.00871513	0.0121318	0.0127284	0.0309088	0	0.00156899	0.0299472	0.00747781	0.000184801	0.00389273	0.0142676	0.0186082	0.0165032	0.0151926	0.0197996	0.0221151	0.0614702	0.203168	0.0257481	0.0297976	0.0285676	0.0338544	-8.84814e-05	0.0377108	0.0382541	0.0191444	0.0065017	0.0266869	0.0832931	0.0565605	0.0346714	0.0488209	0.066838	0.0551218	0.0386586	0.0327522	0.0126186	0.042178	0.0389214	0.0385107	0.02067	0.0235117	0.00293124	0.0372117	0.0298791	0.0405595
Kazakh	0.0186495	0.00703765	0.00996993	0.0134957	0.0172773	0.00785362	0.038677	0.00156899	0	0.0371422	0.00377986	0.000980061	0.00557104	0.0201103	0.0255578	0.0220321	0.0106482	0.0251062	0.0178309	0.0541373	0.207085	0.0200603	0.0235092	0.0229031	0.0279561	0.000815907	0.032233	0.0320071	0.0142735	0.00305359	0.0258817	0.0774929	0.0513081	0.0294297	0.0436378	0.0620225	0.0498853	0.0338876	0.0277905	0.00937512	0.0359141	0.0325318	0.033008	0.0157537	0.0174008	0.00103717	0.0306922	0.023919	0.034232
Mordovian	0.0483428	0.0535387	0.0200966	0.00989745	0.00730572	0.0726109	0.00573394	0.0299472	0.0371422	0	0.0652482	0.0262914	0.0216958	0.0048281	0.00466909	0.0089141	0.0672806	0.0169864	0.0705017	0.11796	0.212099	0.0824134	0.0956528	0.0935186	0.0987076	0.0286254	0.099057	0.102769	0.081294	0.061924	0.0577539	0.13934	0.116299	0.0900795	0.106386	0.12584	0.112654	0.0894948	0.0950403	0.0785556	0.10294	0.0997989	0.101294	0.0807216	0.0852287	0.0443041	0.0997138	0.0937515	0.102058
Mongol_Uuld	0.0248076	0.00626286	0.0245514	0.0330403	0.038918	0.00248522	0.0686033	0.00747781	0.00377986	0.0652482	0	0.0115507	0.0180926	0.0452242	0.0539573	0.0449355	0.00591579	0.0494708	0.015063	0.0458296	0.224334	0.0134567	0.0154988	0.01515	0.0208498	0.0123733	0.0271382	0.0249426	0.00852255	0.00101002	0.0306205	0.0764375	0.0464803	0.0236301	0.0405536	0.0589213	0.0473185	0.0324713	0.0217744	0.00907159	0.0282067	0.0243051	0.0271811	0.0106637	0.00903232	0.00455892	0.0230879	0.0155728	0.0260435
Nogai2	0.0184796	0.0100258	0.00677736	0.00827093	0.0107314	0.0160081	0.0290252	0.000184801	0.000980061	0.0262914	0.0115507	0	0.00324862	0.0132688	0.0184718	0.0154491	0.0163414	0.0200615	0.023284	0.0627969	0.205643	0.0270446	0.0333959	0.0324889	0.0374212	0.00142049	0.0410194	0.0419847	0.0226993	0.00990122	0.0271845	0.0874196	0.0604459	0.0356162	0.0527669	0.0714609	0.0591425	0.0413606	0.0365206	0.0210666	0.0441602	0.0404406	0.0420208	0.0229986	0.0253556	0.00411421	0.0396944	0.0331915	0.0426636
Tatar_Siberian	0.0198223	0.0142933	0.00492744	0.00532612	0.00731532	0.0227454	0.0239682	0.00389273	0.00557104	0.0216958	0.0180926	0.00324862	0	0.00987323	0.0153603	0.0111448	0.0211359	0.0147295	0.0252019	0.0636106	0.205281	0.0326475	0.0430774	0.0417277	0.0472486	0.00493525	0.0505631	0.0513973	0.0313969	0.0167406	0.0234611	0.095243	0.069224	0.0443136	0.0605541	0.0798392	0.0672457	0.043922	0.045953	0.0293002	0.0535119	0.0500411	0.0514219	0.0323753	0.034436	0.00904811	0.0491482	0.0424713	0.0522055
Tatar_Kazan	0.0347247	0.0363833	0.00959159	0.00252425	0.00145242	0.0520913	0.00768399	0.0142676	0.0201103	0.0048281	0.0452242	0.0132688	0.00987323	0	0.00303332	0.0035319	0.04805	0.00950007	0.0518227	0.0990845	0.206684	0.0627783	0.0748261	0.0731711	0.0786845	0.0153977	0.0800294	0.0831381	0.0610171	0.0423462	0.0430279	0.12482	0.0986467	0.0710612	0.0883591	0.109066	0.095247	0.0723083	0.0751711	0.0581865	0.0838954	0.0803395	0.0815314	0.0606135	0.0649171	0.0273928	0.0800272	0.0736268	0.0824467
Tatar_Mishar	0.0414381	0.0440834	0.0141689	0.00609734	0.00483701	0.0611257	0.00766529	0.0186082	0.0255578	0.00466909	0.0539573	0.0184718	0.0153603	0.00303332	0	0.00658046	0.0567409	0.0146268	0.0610995	0.110726	0.210616	0.0718884	0.0846711	0.0826536	0.0882237	0.0202529	0.0890601	0.0931846	0.0699321	0.0504301	0.0508205	0.135476	0.108236	0.0798764	0.0979779	0.119522	0.10529	0.0814595	0.0845032	0.0673451	0.0930567	0.0895196	0.0909488	0.0693589	0.0739623	0.0346013	0.0891936	0.0825412	0.091706
Chuvash	0.0357251	0.0363019	0.0113352	0.00466455	0.0042127	0.0515401	0.0112883	0.0165032	0.0220321	0.0089141	0.0449355	0.0154491	0.0111448	0.0035319	0.00658046	0	0.0469932	0.0120151	0.0500542	0.094653	0.209785	0.0611644	0.0755875	0.0738362	0.0796315	0.0173192	0.0807947	0.0835337	0.0619528	0.0423715	0.0411449	0.124848	0.0992482	0.0723828	0.0893744	0.109907	0.0963529	0.0704199	0.0765698	0.0591658	0.0848301	0.0813916	0.0828509	0.0616269	0.0656835	0.0285813	0.0810997	0.0740795	0.0835065
Tuvinian	0.0261227	0.00709451	0.0277389	0.0360162	0.041401	0.00750018	0.0701593	0.0151926	0.0106482	0.0672806	0.00591579	0.0163414	0.0211359	0.04805	0.0567409	0.0469932	0	0.0501244	0.0151114	0.0381724	0.227919	0.0147326	0.0251222	0.0237031	0.0301967	0.0180416	0.0356126	0.0341927	0.0168263	0.00668144	0.0280221	0.0819104	0.054405	0.0320527	0.0487375	0.0659372	0.0550381	0.022649	0.0310833	0.017435	0.0367393	0.0330543	0.036027	0.0192016	0.0175991	0.0102422	0.0320858	0.0243469	0.0348794
Udmurt	0.038927	0.0391248	0.015243	0.0092371	0.00806737	0.0547963	0.0196126	0.0197996	0.0251062	0.0169864	0.0494708	0.0200615	0.0147295	0.00950007	0.0146268	0.0120151	0.0501244	0	0.0531787	0.0969804	0.215944	0.0646702	0.079795	0.0784172	0.084321	0.0215957	0.0853095	0.0890829	0.0660078	0.0465981	0.0419702	0.132739	0.105187	0.0769293	0.0950396	0.115982	0.10215	0.073886	0.0814365	0.0633076	0.089603	0.0858142	0.0873409	0.0658085	0.0698007	0.0327946	0.085723	0.0791632	0.088048
Yukagir	0.0332189	0.0167116	0.031851	0.0398305	0.0447418	0.0141287	0.0727142	0.0221151	0.0178309	0.0705017	0.015063	0.023284	0.0252019	0.0518227	0.0610995	0.0500542	0.0151114	0.0531787	0	0.0324827	0.23465	0.0177881	0.0384977	0.0369082	0.0434147	0.0259977	0.0488664	0.047219	0.0290911	0.0153094	0.0292554	0.0946149	0.06746	0.0440665	0.0610715	0.0784576	0.0673715	0.0355918	0.0435615	0.0315708	0.0492424	0.0455098	0.0489292	0.0312705	0.0300458	0.018135	0.0450118	0.0370462	0.0476794
Nganasan	0.0671162	0.0459065	0.0714294	0.0825623	0.0888815	0.0405806	0.12286	0.0614702	0.0541373	0.11796	0.0458296	0.0627969	0.0636106	0.0990845	0.110726	0.094653	0.0381724	0.0969804	0.0324827	0	0.27295	0.0405455	0.0706917	0.0685695	0.0755423	0.0679173	0.0823647	0.0793659	0.0617938	0.0470698	0.0512727	0.126359	0.0996403	0.0761352	0.0951655	0.110705	0.10099	0.0516132	0.0771105	0.0667346	0.0807782	0.0765247	0.0818086	0.0648007	0.0609975	0.0533094	0.077032	0.0680026	0.0791542
Mbuti	0.221975	0.219189	0.206428	0.203811	0.205725	0.230043	0.217948	0.203168	0.207085	0.212099	0.224334	0.205643	0.205281	0.206684	0.210616	0.209785	0.227919	0.215944	0.23465	0.27295	0	0.24018	0.240556	0.238825	0.243231	0.204007	0.242634	0.246951	0.230686	0.222709	0.2326	0.279293	0.25838	0.234626	0.248246	0.266519	0.254797	0.250361	0.239353	0.230733	0.245912	0.243114	0.244418	0.231293	0.233923	0.212542	0.242617	0.238567	0.244602
Yakut_HGDP	0.0368145	0.0180237	0.0394665	0.0494267	0.0551855	0.0120704	0.0857732	0.0257481	0.0200603	0.0824134	0.0134567	0.0270446	0.0326475	0.0627783	0.0718884	0.0611644	0.0147326	0.0646702	0.0177881	0.0405455	0.24018	0	0.0333591	0.0325675	0.0385205	0.0296391	0.0451028	0.042599	0.0251805	0.0139337	0.0369173	0.090985	0.0636335	0.0408452	0.0581551	0.0753353	0.0646421	0.0362085	0.0399407	0.0280635	0.04529	0.0414516	0.0445617	0.028137	0.0259364	0.0191619	0.0409729	0.0322371	0.0437172
Tujia_HGDP	0.0469013	0.025953	0.0509714	0.0612173	0.0682072	0.0208587	0.100584	0.0297976	0.0235092	0.0956528	0.0154988	0.0333959	0.0430774	0.0748261	0.0846711	0.0755875	0.0251222	0.079795	0.0384977	0.0706917	0.240556	0.0333591	0	0.00585084	0.00385095	0.0304722	0.00841758	0.00852876	0.00375293	0.0169677	0.0577057	0.0594334	0.0275241	0.00867762	0.0239534	0.0405432	0.0305472	0.0552504	0.00406435	0.0062352	0.00753316	0.00454777	0.00895026	0.00678706	0.00243224	0.0223803	0.00360592	0.0130146	0.00595926
Yi_HGDP	0.0458753	0.02505	0.049503	0.0597235	0.0664826	0.0202341	0.0982571	0.0285676	0.0229031	0.0935186	0.01515	0.0324889	0.0417277	0.0731711	0.0826536	0.0738362	0.0237031	0.0784172	0.0369082	0.0685695	0.238825	0.0325675	0.00585084	0	0.00990324	0.0298193	0.0161647	0.0152487	0.00411348	0.0169139	0.0557194	0.0696006	0.0369272	0.0150293	0.0320987	0.0496277	0.0386761	0.0538816	0.011775	0.00607347	0.0159606	0.0127021	0.0152852	0.00750457	0.00430241	0.0219299	0.0117348	0.0052965	0.0145167
Miao_HGDP	0.051028	0.0305167	0.0547825	0.0648373	0.0719238	0.0258927	0.104145	0.0338544	0.0279561	0.0987076	0.0208498	0.0374212	0.0472486	0.0786845	0.0882237	0.0796315	0.0301967	0.084321	0.0434147	0.0755423	0.243231	0.0385205	0.00385095	0.00990324	0	0.0353476	0.00973615	0.0121033	0.00910938	0.0226065	0.0620396	0.0638637	0.0313561	0.0105044	0.0262717	0.0439057	0.0326231	0.0601834	0.00655103	0.0115859	0.00906148	0.00676776	0.0103718	0.0116032	0.0073577	0.0274054	0.00598722	0.0174251	0.00902233
Uyghur_HGDP	0.0194091	0.011446	0.00811864	0.00958085	0.0125139	0.0177301	0.0320911	-8.84814e-05	0.000815907	0.0286254	0.0123733	0.00142049	0.00493525	0.0153977	0.0202529	0.0173192	0.0180416	0.0215957	0.0259977	0.0679173	0.204007	0.0296391	0.0304722	0.0298193	0.0353476	0	0.037873	0.0387641	0.0206677	0.0109845	0.029652	0.0863669	0.0577588	0.0325009	0.0493644	0.0698846	0.0562341	0.0448113	0.0332547	0.0183006	0.0413589	0.0375626	0.0390934	0.0215134	0.0234893	0.00480176	0.0361999	0.031055	0.0395343
Dai_HGDP	0.0549314	0.0354345	0.0572055	0.0665354	0.0731516	0.0320578	0.104008	0.0377108	0.032233	0.099057	0.0271382	0.0410194	0.0505631	0.0800294	0.0890601	0.0807947	0.0356126	0.0853095	0.0488664	0.0823647	0.242634	0.0451028	0.00841758	0.0161647	0.00973615	0.037873	0	0.0144628	0.0157904	0.0283054	0.0665662	0.0581312	0.0265319	0.00494663	0.0206224	0.0397391	0.026637	0.0662549	0.00299394	0.0175204	0.00469116	0.002526	0.00814167	0.0174859	0.0142584	0.0322308	0.00466843	0.0272419	0.0048943
She_HGDP	0.0553786	0.0346549	0.0588419	0.0694854	0.0762665	0.0304813	0.10831	0.0382541	0.0320071	0.102769	0.0249426	0.0419847	0.0513973	0.0831381	0.0931846	0.0835337	0.0341927	0.0890829	0.047219	0.0793659	0.246951	0.042599	0.00852876	0.0152487	0.0121033	0.0387641	0.0144628	0	0.0133969	0.0266918	0.0657692	0.0657438	0.0335554	0.0141812	0.0303562	0.0471085	0.0368978	0.0647029	0.0111306	0.0154624	0.0129376	0.0100011	0.0163513	0.0159488	0.011142	0.031618	0.0100917	0.0230522	0.0119961
Tu_HGDP	0.0363272	0.0169465	0.0384827	0.0480629	0.0547485	0.0133831	0.0854954	0.0191444	0.0142735	0.081294	0.00852255	0.0226993	0.0313969	0.0610171	0.0699321	0.0619528	0.0168263	0.0660078	0.0290911	0.0617938	0.230686	0.0251805	0.00375293	0.00411348	0.00910938	0.0206677	0.0157904	0.0133969	0	0.00998324	0.046231	0.0676251	0.0361305	0.0138432	0.0311253	0.0487105	0.0376859	0.0464718	0.0115166	0.00237173	0.0158168	0.0125687	0.0161752	0.00392799	0.00132854	0.0136186	0.0108065	0.00513868	0.0143176
Kalmyk	0.0235908	0.00690324	0.0227661	0.0308451	0.036294	0.00305246	0.0647211	0.0065017	0.00305359	0.061924	0.00101002	0.00990122	0.0167406	0.0423462	0.0504301	0.0423715	0.00668144	0.0465981	0.0153094	0.0470698	0.222709	0.0139337	0.0169677	0.0169139	0.0226065	0.0109845	0.0283054	0.0266918	0.00998324	0	0.029983	0.078888	0.047979	0.0243164	0.0422516	0.060758	0.0485129	0.033105	0.0230781	0.0101876	0.0294138	0.0253123	0.027671	0.011732	0.0104358	0.00443992	0.0240291	0.0176752	0.0275977
Selkup	0.0355148	0.02684	0.0281605	0.033194	0.0365635	0.0320752	0.0601314	0.0266869	0.0258817	0.0577539	0.0306205	0.0271845	0.0234611	0.0430279	0.0508205	0.0411449	0.0280221	0.0419702	0.0292554	0.0512727	0.2326	0.0369173	0.0577057	0.0557194	0.0620396	0.029652	0.0665662	0.0657692	0.046231	0.029983	0	0.110839	0.0853881	0.0605422	0.077309	0.095302	0.0839399	0.0452218	0.0618399	0.0471722	0.0678845	0.0644162	0.0671914	0.0482361	0.0481805	0.0271759	0.0641749	0.0555868	0.066137
Atayal	0.0996573	0.0812995	0.101484	0.111047	0.116468	0.0819605	0.148357	0.0832931	0.0774929	0.13934	0.0764375	0.0874196	0.095243	0.12482	0.135476	0.124848	0.0819104	0.132739	0.0946149	0.126359	0.279293	0.090985	0.0594334	0.0696006	0.0638637	0.0863669	0.0581312	0.0657438	0.0676251	0.078888	0.110839	0	0.0555257	0.0561228	0.0609446	0.0706718	0.0657833	0.113882	0.0567233	0.0734808	0.057389	0.0537423	0.0627097	0.069868	0.0631289	0.07939	0.056403	0.0788719	0.0564084
Ami	0.0742012	0.0542558	0.0758708	0.0854594	0.0918056	0.0518585	0.12297	0.0565605	0.0513081	0.116299	0.0464803	0.0604459	0.069224	0.0986467	0.108236	0.0992482	0.054405	0.105187	0.06746	0.0996403	0.25838	0.0636335	0.0275241	0.0369272	0.0313561	0.0577588	0.0265319	0.0335554	0.0361305	0.047979	0.0853881	0.0555257	0	0.0262877	0.0264118	0.0352447	0.0312021	0.0853737	0.0244187	0.0394609	0.0258521	0.0229851	0.0305264	0.038634	0.0332016	0.0511451	0.0255317	0.0487622	0.0249715
Thai	0.0494953	0.0316065	0.0506274	0.0596222	0.0654398	0.0289366	0.0947414	0.0346714	0.0294297	0.0900795	0.0236301	0.0356162	0.0443136	0.0710612	0.0798764	0.0723828	0.0320527	0.0769293	0.0440665	0.0761352	0.234626	0.0408452	0.00867762	0.0150293	0.0105044	0.0325009	0.00494663	0.0141812	0.0138432	0.0243164	0.0605422	0.0561228	0.0262877	0	0.019387	0.0388024	0.0252242	0.0601526	0.00312092	0.0147496	0.00637927	0.00441714	0.0086756	0.0161218	0.0128151	0.0275609	0.00622497	0.0250088	0.00632298
Dusun	0.0665882	0.0481067	0.0669097	0.0760166	0.0817323	0.0459707	0.11206	0.0488209	0.0436378	0.106386	0.0405536	0.0527669	0.0605541	0.0883591	0.0979779	0.0893744	0.0487375	0.0950396	0.0610715	0.0951655	0.248246	0.0581551	0.0239534	0.0320987	0.0262717	0.0493644	0.0206224	0.0303562	0.0311253	0.0422516	0.077309	0.0609446	0.0264118	0.019387	0	0.0377517	0.0246422	0.0786385	0.0178959	0.0335261	0.0211863	0.0198071	0.0250857	0.0335841	0.0293591	0.0444682	0.0213949	0.0434055	0.0213035
Kankanaey	0.084576	0.0650218	0.0861614	0.0960196	0.101652	0.0637289	0.133424	0.066838	0.0620225	0.12584	0.0589213	0.0714609	0.0798392	0.109066	0.119522	0.109907	0.0659372	0.115982	0.0784576	0.110705	0.266519	0.0753353	0.0405432	0.0496277	0.0439057	0.0698846	0.0397391	0.0471085	0.0487105	0.060758	0.095302	0.0706718	0.0352447	0.0388024	0.0377517	0	0.0424312	0.0972133	0.0373195	0.0525629	0.038413	0.036114	0.0438508	0.0508117	0.0452635	0.0628042	0.0380803	0.0605542	0.0378077
Murut	0.0727287	0.0539946	0.0738416	0.0828325	0.0884885	0.0528275	0.119043	0.0551218	0.0498853	0.112654	0.0473185	0.0591425	0.0672457	0.095247	0.10529	0.0963529	0.0550381	0.10215	0.0673715	0.10099	0.254797	0.0646421	0.0305472	0.0386761	0.0326231	0.0562341	0.026637	0.0368978	0.0376859	0.0485129	0.0839399	0.0657833	0.0312021	0.0252242	0.0246422	0.0424312	0	0.0854649	0.0239648	0.0410351	0.0271656	0.0251378	0.0305582	0.0403244	0.0353681	0.0507392	0.0270404	0.0498564	0.0272763
Tofalar	0.0487699	0.0298236	0.0502234	0.059182	0.0640866	0.0322163	0.0938923	0.0386586	0.0338876	0.0894948	0.0324713	0.0413606	0.043922	0.0723083	0.0814595	0.0704199	0.022649	0.073886	0.0355918	0.0516132	0.250361	0.0362085	0.0552504	0.0538816	0.0601834	0.0448113	0.0662549	0.0647029	0.0464718	0.033105	0.0452218	0.113882	0.0853737	0.0601526	0.0786385	0.0972133	0.0854649	0	0.0613967	0.0488552	0.0662414	0.062605	0.0661719	0.0487766	0.046372	0.0354555	0.0616166	0.0535425	0.064322
Vietnamese	0.0505716	0.0310673	0.0528307	0.0620129	0.0689829	0.0276686	0.100149	0.0327522	0.0277905	0.0950403	0.0217744	0.0365206	0.045953	0.0751711	0.0845032	0.0765698	0.0310833	0.0814365	0.0435615	0.0771105	0.239353	0.0399407	0.00406435	0.011775	0.00655103	0.0332547	0.00299394	0.0111306	0.0115166	0.0230781	0.0618399	0.0567233	0.0244187	0.00312092	0.0178959	0.0373195	0.0239648	0.0613967	0	0.0123346	0.00290919	0.00101818	0.00631532	0.0134096	0.00926795	0.0271653	0.0024394	0.0224173	0.00314367
Tibetan_Gannan	0.0367241	0.0172469	0.0366869	0.0453818	0.0523542	0.0150109	0.0828996	0.0126186	0.00937512	0.0785556	0.00907159	0.0210666	0.0293002	0.0581865	0.0673451	0.0591658	0.017435	0.0633076	0.0315708	0.0667346	0.230733	0.0280635	0.0062352	0.00607347	0.0115859	0.0183006	0.0175204	0.0154624	0.00237173	0.0101876	0.0471722	0.0734808	0.0394609	0.0147496	0.0335261	0.0525629	0.0410351	0.0488552	0.0123346	0	0.0176316	0.0137718	0.0174312	0.00492098	0.00246434	0.0121437	0.0117429	0.00824311	0.0152199
Maonan_Huanjiang	0.0571736	0.0371854	0.0604967	0.0708021	0.0771016	0.0329709	0.108385	0.042178	0.0359141	0.10294	0.0282067	0.0441602	0.0535119	0.0838954	0.0930567	0.0848301	0.0367393	0.089603	0.0492424	0.0807782	0.245912	0.04529	0.00753316	0.0159606	0.00906148	0.0413589	0.00469116	0.0129376	0.0158168	0.0294138	0.0678845	0.057389	0.0258521	0.00637927	0.0211863	0.038413	0.0271656	0.0662414	0.00290919	0.0176316	0	0.00143637	0.00843601	0.0176978	0.0137475	0.0338506	0.00304238	0.0275682	0.00357971
Zhuang_Guangxi	0.0533592	0.0335592	0.0569543	0.0671498	0.0736839	0.0290163	0.104721	0.0389214	0.0325318	0.0997989	0.0243051	0.0404406	0.0500411	0.0803395	0.0895196	0.0813916	0.0330543	0.0858142	0.0455098	0.0765247	0.243114	0.0414516	0.00454777	0.0127021	0.00676776	0.0375626	0.002526	0.0100011	0.0125687	0.0253123	0.0644162	0.0537423	0.0229851	0.00441714	0.0198071	0.036114	0.0251378	0.062605	0.00101818	0.0137718	0.00143637	0	0.00629416	0.0143225	0.0101105	0.0301999	0.00131797	0.0238788	0.00185347
Gelao_Longlin	0.0560205	0.0360529	0.0585312	0.0684878	0.075095	0.0324918	0.106099	0.0385107	0.033008	0.101294	0.0271811	0.0420208	0.0514219	0.0815314	0.0909488	0.0828509	0.036027	0.0873409	0.0489292	0.0818086	0.244418	0.0445617	0.00895026	0.0152852	0.0103718	0.0390934	0.00814167	0.0163513	0.0161752	0.027671	0.0671914	0.0627097	0.0305264	0.0086756	0.0250857	0.0438508	0.0305582	0.0661719	0.00631532	0.0174312	0.00843601	0.00629416	0	0.017973	0.0139591	0.032739	0.00708595	0.026288	0.00821864
Baoan_Jishishan	0.0379157	0.0190084	0.0392858	0.0484914	0.0547006	0.0162059	0.0848042	0.02067	0.0157537	0.0807216	0.0106637	0.0229986	0.0323753	0.0606135	0.0693589	0.0616269	0.0192016	0.0658085	0.0312705	0.0648007	0.231293	0.028137	0.00678706	0.00750457	0.0116032	0.0215134	0.0174859	0.0159488	0.00392799	0.011732	0.0482361	0.069868	0.038634	0.0161218	0.0335841	0.0508117	0.0403244	0.0487766	0.0134096	0.00492098	0.0176978	0.0143225	0.017973	0	0.00369814	0.0146863	0.012752	0.0097607	0.0159943
Yugur_Sunan	0.038597	0.01835	0.0415987	0.0519239	0.0581911	0.013753	0.089345	0.0235117	0.0174008	0.0852287	0.00903232	0.0253556	0.034436	0.0649171	0.0739623	0.0656835	0.0175991	0.0698007	0.0300458	0.0609975	0.233923	0.0259364	0.00243224	0.00430241	0.0073577	0.0234893	0.0142584	0.011142	0.00132854	0.0104358	0.0481805	0.0631289	0.0332016	0.0128151	0.0293591	0.0452635	0.0353681	0.046372	0.00926795	0.00246434	0.0137475	0.0101105	0.0139591	0.00369814	0	0.0149294	0.00873086	0.00714788	0.0116886
Kyrgyz_Urumqi	0.0198637	0.00692957	0.0137032	0.0188661	0.0232769	0.00909417	0.0471903	0.00293124	0.00103717	0.0443041	0.00455892	0.00411421	0.00904811	0.0273928	0.0346013	0.0285813	0.0102422	0.0327946	0.018135	0.0533094	0.212542	0.0191619	0.0223803	0.0219299	0.0274054	0.00480176	0.0322308	0.031618	0.0136186	0.00443992	0.0271759	0.07939	0.0511451	0.0275609	0.0444682	0.0628042	0.0507392	0.0354555	0.0271653	0.0121437	0.0338506	0.0301999	0.032739	0.0146863	0.0149294	0	0.0285483	0.0230437	0.0319234
Dong_Guizhou	0.053266	0.0328121	0.0564378	0.0667723	0.073416	0.0282064	0.104793	0.0372117	0.0306922	0.0997138	0.0230879	0.0396944	0.0491482	0.0800272	0.0891936	0.0810997	0.0320858	0.085723	0.0450118	0.077032	0.242617	0.0409729	0.00360592	0.0117348	0.00598722	0.0361999	0.00466843	0.0100917	0.0108065	0.0240291	0.0641749	0.056403	0.0255317	0.00622497	0.0213949	0.0380803	0.0270404	0.0616166	0.0024394	0.0117429	0.00304238	0.00131797	0.00708595	0.012752	0.00873086	0.0285483	0	0.0222947	0.00288864
Tibetan_Chamdo	0.046019	0.0254137	0.0501153	0.0604684	0.066916	0.0209905	0.0982425	0.0298791	0.023919	0.0937515	0.0155728	0.0331915	0.0424713	0.0736268	0.0825412	0.0740795	0.0243469	0.0791632	0.0370462	0.0680026	0.238567	0.0322371	0.0130146	0.0052965	0.0174251	0.031055	0.0272419	0.0230522	0.00513868	0.0176752	0.0555868	0.0788719	0.0487622	0.0250088	0.0434055	0.0605542	0.0498564	0.0535425	0.0224173	0.00824311	0.0275682	0.0238788	0.026288	0.0097607	0.00714788	0.0230437	0.0222947	0	0.0254528
Mulam_Luocheng	0.0556517	0.0355739	0.0588606	0.0690758	0.0758752	0.0311121	0.107158	0.0405595	0.034232	0.102058	0.0260435	0.0426636	0.0522055	0.0824467	0.091706	0.0835065	0.0348794	0.088048	0.0476794	0.0791542	0.244602	0.0437172	0.00595926	0.0145167	0.00902233	0.0395343	0.0048943	0.0119961	0.0143176	0.0275977	0.066137	0.0564084	0.0249715	0.00632298	0.0213035	0.0378077	0.0272763	0.064322	0.00314367	0.0152199	0.00357971	0.00185347	0.00821864	0.0159943	0.0116886	0.0319234	0.00288864	0.0254528	0
Qiang_Daofu	0.0451101	0.0241598	0.0489514	0.0592355	0.0661227	0.0197949	0.0982746	0.0281217	0.0226516	0.0935995	0.0139805	0.0318071	0.0413057	0.0734028	0.0825661	0.0738891	0.0233654	0.0781311	0.035956	0.0668112	0.239324	0.0311611	0.00815997	0.0039769	0.0130952	0.0296947	0.0208974	0.0179559	0.00373929	0.0161604	0.0545859	0.0726476	0.0421825	0.01926	0.0373242	0.0543229	0.0437361	0.0525011	0.0165513	0.00525417	0.0209868	0.0171626	0.0205472	0.00708634	0.00464031	0.0211593	0.0151063	0.00218064	0.0184671
Tibetan_Xunhua	0.0364796	0.0167774	0.0353707	0.044969	0.0508804	0.0148917	0.083261	0.00492904	0.00278989	0.0790296	0.00782623	0.0188083	0.0287401	0.0570276	0.0670912	0.0589574	0.017154	0.0639226	0.0305565	0.0702883	0.231073	0.0276811	0.00753717	0.00524866	0.0135553	0.0161377	0.0205054	0.0193525	0.00157216	0.00983375	0.0474627	0.0832797	0.0451632	0.017566	0.0375538	0.0585291	0.0453472	0.0518029	0.0154364	0.00143815	0.0223335	0.0168399	0.0206181	0.0039027	0.0022573	0.0113983	0.0144591	0.00383338	0.0194618
Tibetan_Gangcha	0.0387061	0.0196737	0.0419699	0.0517102	0.0578865	0.014968	0.0882404	0.0245247	0.0187779	0.0841702	0.0106015	0.025837	0.0347891	0.0644659	0.0735018	0.0649575	0.0183646	0.0691838	0.0308404	0.0609547	0.233074	0.0264305	0.0102262	0.00498645	0.0148692	0.0240409	0.0228382	0.0194286	0.00333272	0.0122348	0.0478377	0.0718665	0.0432628	0.0206252	0.0377308	0.0551288	0.04378	0.0464533	0.0181758	0.00513232	0.0231765	0.0195971	0.0223365	0.00687866	0.0048847	0.0168692	0.018158	0.00153534	0.0214887
Tibetan_Lhasa	0.0448798	0.0254809	0.0483275	0.057993	0.0642868	0.0222795	0.0955858	0.0277242	0.0227633	0.0910593	0.0168125	0.0322387	0.0408788	0.0711785	0.0797927	0.0715409	0.025138	0.0763303	0.0378424	0.0696661	0.237471	0.0337867	0.0146705	0.008401	0.0194059	0.0297648	0.0287361	0.025608	0.00728352	0.0187999	0.0549207	0.0817829	0.0497298	0.0255816	0.044324	0.062438	0.0512486	0.0545043	0.0237273	0.00953737	0.028187	0.0250134	0.0280219	0.0112091	0.0093495	0.023373	0.0231267	0.00211387	0.0268771
TibetanHO_Yunnan	0.0569105	0.0363606	0.0581977	0.0681418	0.0750056	0.0329985	0.10744	0.0316327	0.0274319	0.102172	0.0283943	0.0421076	0.0509239	0.0821882	0.0917181	0.0824257	0.0365154	0.0869922	0.0501404	0.0846924	0.246828	0.0468049	0.0232049	0.017806	0.0284052	0.0399025	0.0368421	0.0348464	0.0178359	0.0289451	0.0673206	0.0964205	0.0604124	0.0326202	0.0532048	0.0744679	0.0615569	0.0692408	0.0323496	0.0215474	0.0369576	0.0328281	0.0361437	0.0224092	0.0185872	0.0334008	0.0319099	0.016949	0.0347246
Tibetan_Nagqu	0.0436951	0.0237844	0.0465767	0.0569093	0.0633591	0.0201857	0.0951723	0.025172	0.020239	0.0903733	0.0145391	0.0309133	0.0395379	0.0704321	0.0792788	0.0706707	0.0226857	0.0756531	0.0354491	0.0681345	0.23699	0.0316439	0.012954	0.0056511	0.0181799	0.0276304	0.0270858	0.0233593	0.00543379	0.0168854	0.0544033	0.0805216	0.0484384	0.0237343	0.0425945	0.061613	0.0496716	0.053407	0.0219993	0.00919003	0.0266276	0.0230115	0.0256151	0.00968888	0.00672926	0.020776	0.0209552	4.92207e-05	0.0243525
Tibetan_Yajiang	0.0441722	0.0238107	0.0471776	0.05697	0.0638972	0.0200574	0.0954483	0.0257152	0.0202051	0.0909311	0.0146593	0.0303166	0.0393191	0.070354	0.0795497	0.0712061	0.0233542	0.0757252	0.0361534	0.0683892	0.236952	0.0318301	0.00917241	0.00503717	0.01492	0.0277048	0.0232717	0.0201181	0.00434153	0.0162169	0.0543641	0.076467	0.0440635	0.0205637	0.0387659	0.0567812	0.0450251	0.053678	0.0176145	0.00445348	0.0229822	0.0190261	0.021913	0.00699681	0.00498679	0.0197521	0.0159958	0.0023993	0.0200475
Tibetan_Shigatse	0.0455344	0.0263323	0.0487086	0.0588429	0.0651005	0.0230639	0.0964084	0.0290807	0.0236436	0.091458	0.0178437	0.0330292	0.0416008	0.0718716	0.081213	0.0725009	0.0255991	0.0772815	0.0379168	0.0700879	0.237598	0.0340831	0.0160079	0.00965153	0.0204638	0.0306588	0.0288303	0.0259149	0.00792678	0.0194851	0.0554072	0.0813442	0.0505475	0.0258886	0.0446346	0.062846	0.0515659	0.0544929	0.0244214	0.0112297	0.0291996	0.0256117	0.0278489	0.0124812	0.00992887	0.0235888	0.0240638	0.00407972	0.0270737
Tibetan_Xinlong	0.0434238	0.0229578	0.0476246	0.0575632	0.0644655	0.0182069	0.0965632	0.0264235	0.0206722	0.0922607	0.0127374	0.0300667	0.0399538	0.0715002	0.0806845	0.0719467	0.0219219	0.0762006	0.0355238	0.0672638	0.237287	0.0305576	0.00379339	0.00357211	0.00846295	0.0271406	0.0150381	0.0133752	0.00191513	0.0153218	0.0537305	0.0671024	0.0355687	0.013875	0.0305718	0.0480682	0.0373818	0.0518295	0.0107806	0.00261604	0.0150045	0.0112885	0.015374	0.00507367	0.0017499	0.0195073	0.00955071	0.0044879	0.0128776
Tibetan_Shannan	0.0459093	0.0261594	0.0488725	0.0582209	0.063963	0.0231625	0.0953737	0.0280446	0.0231912	0.0906288	0.0174634	0.0323383	0.0413511	0.0708586	0.0797313	0.0718833	0.025913	0.0764455	0.0383594	0.0713937	0.237018	0.0343399	0.0161793	0.00985946	0.0204529	0.0301314	0.0292577	0.026162	0.00756001	0.0196598	0.0559136	0.0820508	0.0508398	0.0263976	0.0445464	0.0634882	0.0520346	0.0552079	0.0246438	0.011545	0.029484	0.0256939	0.0287395	0.0122801	0.0101423	0.0233948	0.0241384	0.00379924	0.028028
BoY	0.0870786	0.0680312	0.0897993	0.0996489	0.105463	0.0678173	0.137003	0.0710977	0.0648014	0.128886	0.0618574	0.0751738	0.0834202	0.113583	0.123995	0.114426	0.0681051	0.120751	0.081301	0.112253	0.269629	0.0775567	0.0468293	0.0531398	0.048987	0.0740269	0.0482717	0.0538492	0.0520722	0.0637653	0.0975384	0.10065	0.0689272	0.0458296	0.0646223	0.0819538	0.0704976	0.0991725	0.0463543	0.0586892	0.0456849	0.043317	0.0508104	0.0535295	0.0486677	0.0664593	0.0448599	0.061123	0.0447753
Cham	0.0457766	0.0299298	0.044546	0.0515845	0.0570754	0.0286465	0.0849229	0.0274959	0.0240051	0.0808242	0.0226829	0.0304472	0.0383987	0.0621962	0.070607	0.0643018	0.031893	0.0685875	0.0433486	0.0796189	0.226564	0.0414304	0.0121457	0.0174758	0.0142897	0.0268911	0.00860661	0.0188477	0.0160466	0.0231368	0.057291	0.0622986	0.0303157	0.00630702	0.0195544	0.0432742	0.0264412	0.0613507	0.00616955	0.0154615	0.0107143	0.00880077	0.0121342	0.0177655	0.0153802	0.0239534	0.00973864	0.0269492	0.010687
CoLao	0.0744378	0.0548405	0.077186	0.0869249	0.0932571	0.0524312	0.124315	0.0582279	0.0524415	0.118204	0.0472291	0.0614108	0.0705484	0.100041	0.110084	0.101256	0.0553053	0.107188	0.0679097	0.100156	0.261672	0.0642921	0.0302492	0.0368272	0.030483	0.0591589	0.0301314	0.0371185	0.0365983	0.0490693	0.0849955	0.0826045	0.0511169	0.0295128	0.046983	0.0650879	0.0534992	0.0853107	0.0278536	0.0391063	0.0290271	0.0270449	0.0301602	0.038458	0.03424	0.0519783	0.0271684	0.0472028	0.0290222
Cong	0.0578925	0.0390774	0.0604001	0.0701313	0.0760608	0.0363092	0.106535	0.041863	0.0364314	0.101306	0.0311297	0.0442717	0.0534713	0.0826663	0.0922156	0.0832937	0.0396811	0.0887798	0.0520886	0.0846365	0.243768	0.0477493	0.0173801	0.019731	0.0197586	0.0417735	0.0186339	0.0246835	0.0210679	0.0329248	0.0694767	0.0723639	0.0416078	0.0168425	0.0337329	0.0552543	0.0396949	0.0689087	0.0161393	0.0228019	0.0196921	0.0170014	0.020879	0.0229486	0.0194703	0.0351239	0.0168161	0.0283199	0.0191441
Dao	0.0581877	0.0387426	0.0615561	0.0713937	0.0778176	0.035081	0.109164	0.0420185	0.0362653	0.103754	0.0297454	0.0453684	0.0543833	0.0843424	0.0941768	0.0856002	0.038532	0.0906162	0.0512189	0.0829388	0.246823	0.0472999	0.0113154	0.0185183	0.0127245	0.0425059	0.00908877	0.018006	0.0183566	0.0313248	0.0689204	0.06292	0.0306311	0.0104604	0.0260002	0.0438991	0.0324877	0.0683961	0.0080941	0.0204637	0.00892497	0.00709292	0.0133273	0.0208386	0.0164119	0.0360167	0.00812772	0.0293028	0.0091612
Ede	0.0542563	0.0380191	0.0520168	0.0593584	0.0646237	0.037798	0.0923198	0.0362783	0.0322269	0.0879236	0.0319932	0.0387964	0.0460169	0.0696536	0.0782884	0.0720591	0.0403621	0.0766862	0.0514012	0.0873585	0.231103	0.0503217	0.0208051	0.0252033	0.021272	0.0353826	0.0139371	0.0270705	0.0242911	0.0325372	0.0643325	0.0681532	0.0377825	0.00969457	0.0241926	0.0505176	0.030652	0.0693656	0.011467	0.0251515	0.0170609	0.0146528	0.01838	0.026496	0.0244152	0.0334232	0.0163024	0.0353668	0.0169832
Giarai	0.0553449	0.0393897	0.0531176	0.0605517	0.0659576	0.0388278	0.094015	0.0380459	0.0337053	0.0889517	0.0334473	0.0399033	0.0475114	0.0709438	0.0795803	0.0725907	0.041148	0.0774533	0.0529186	0.08825	0.232715	0.051472	0.0217732	0.0261485	0.0234619	0.0364874	0.014743	0.0286263	0.0261351	0.0335599	0.0659279	0.0690491	0.0393873	0.0113978	0.0252632	0.0519388	0.031008	0.0699271	0.0130269	0.0263483	0.0186349	0.0167558	0.0193664	0.0280214	0.0265165	0.0342875	0.018214	0.0370562	0.0191604
HaNhi	0.0553846	0.0359701	0.0585298	0.0684926	0.074558	0.0323538	0.105827	0.0393971	0.033853	0.101213	0.0273339	0.0427251	0.0513423	0.081717	0.0911414	0.0826772	0.0359068	0.0872955	0.0486422	0.0808958	0.243539	0.0452754	0.0146312	0.0161894	0.0179055	0.0404322	0.0192247	0.0233318	0.0162924	0.0286148	0.0665225	0.0726526	0.0422086	0.0169014	0.0337139	0.0545198	0.0401708	0.065298	0.0156401	0.0197414	0.0193181	0.0167671	0.0204159	0.0190367	0.0155249	0.0334188	0.0164712	0.0229929	0.0187363
Hmong	0.0761056	0.0567286	0.0805707	0.090951	0.0973237	0.0538039	0.128591	0.0630866	0.0560793	0.121929	0.0490992	0.065062	0.0735347	0.104891	0.114047	0.105939	0.0563764	0.111079	0.0691914	0.0994482	0.26466	0.0646869	0.0299893	0.0368509	0.0271691	0.0624112	0.0341489	0.0358402	0.037643	0.0503615	0.0871588	0.0843663	0.0547828	0.0329621	0.0502375	0.0674859	0.0555881	0.0862889	0.0317902	0.041107	0.0313941	0.0295948	0.0332484	0.0399353	0.0349756	0.0545869	0.0261124	0.0464788	0.0322631
KhoMu	0.0631846	0.0448116	0.0641436	0.0729516	0.078548	0.0426814	0.10842	0.046271	0.0411933	0.103254	0.0380712	0.0495901	0.0573078	0.0851054	0.0945328	0.0860687	0.0455511	0.091427	0.058042	0.0911685	0.244164	0.0557712	0.0233202	0.0273547	0.025228	0.0462561	0.0198514	0.0302073	0.0282877	0.0384566	0.0732693	0.0745734	0.0437996	0.0167415	0.0320463	0.0575124	0.038452	0.0752052	0.0176692	0.0302848	0.0215234	0.0190682	0.0231474	0.0306158	0.0269969	0.0412287	0.0205772	0.0377866	0.0211339
Kinh_Vietnam	0.0510515	0.0316044	0.0529758	0.0631825	0.0694205	0.027073	0.100319	0.0344402	0.0288677	0.0954896	0.0221092	0.0368004	0.0463995	0.075744	0.0851806	0.0769361	0.0313328	0.0815884	0.0439611	0.0763718	0.239578	0.0400875	0.0048365	0.0125055	0.00714223	0.0336466	0.00372567	0.0108899	0.0115842	0.0229649	0.0613894	0.0559834	0.0235033	0.00383971	0.0187307	0.0371382	0.0247292	0.0612577	9.97598e-05	0.013055	0.0034676	0.00134044	0.00683429	0.0138229	0.00966547	0.02789	0.0026832	0.0226459	0.00353346
LaChi	0.0833537	0.0645254	0.0862164	0.0960437	0.101668	0.0625913	0.132758	0.0676278	0.0621246	0.1257	0.0580878	0.0716184	0.0788621	0.10893	0.119512	0.110635	0.0654116	0.116707	0.0783857	0.109297	0.267292	0.0742866	0.0408539	0.0469176	0.0422222	0.0699824	0.0374763	0.0470782	0.0480697	0.0596639	0.0945824	0.0918034	0.0595912	0.0362238	0.0529228	0.0724246	0.0590244	0.0960876	0.035487	0.0509735	0.0363385	0.0344014	0.039254	0.0504797	0.0453954	0.0623591	0.0368881	0.0586726	0.036659
Vietnam_Lahu	0.0643328	0.0452269	0.0672121	0.0767061	0.0826041	0.0423449	0.113281	0.0481763	0.0421283	0.107897	0.0374151	0.0512862	0.0601301	0.0895795	0.0996657	0.0907932	0.0453789	0.0957602	0.058053	0.0900595	0.251011	0.0543502	0.0245716	0.0263999	0.0274469	0.0492327	0.0277967	0.03289	0.0274309	0.0384506	0.0750319	0.0816699	0.0500542	0.0248288	0.0421091	0.0633791	0.0479456	0.0752348	0.0240961	0.0318175	0.0277345	0.0251397	0.0276615	0.0293407	0.025919	0.0425096	0.0252755	0.0345454	0.0272089
LoLo	0.0741617	0.0551209	0.0761402	0.0856967	0.091518	0.0527064	0.122573	0.0578345	0.0518465	0.116113	0.0486654	0.0611012	0.0692608	0.0988544	0.108714	0.0995577	0.0549349	0.105854	0.0681101	0.099871	0.257939	0.0645326	0.0312173	0.0371456	0.0330054	0.0594132	0.0271548	0.0379578	0.037807	0.0494881	0.0845667	0.0810667	0.0495433	0.026451	0.0426381	0.0635045	0.049114	0.0858473	0.0262744	0.0413787	0.026857	0.0255034	0.0299033	0.0395649	0.0352164	0.0523405	0.027791	0.0476723	0.0283899
Mang	0.0852726	0.0672903	0.0862688	0.0959278	0.101226	0.0670649	0.130664	0.0691297	0.0642369	0.123761	0.0631048	0.0724899	0.0799485	0.107594	0.11803	0.1095	0.068643	0.115329	0.0805308	0.113603	0.264334	0.0778605	0.048771	0.051552	0.0498297	0.0713401	0.0469941	0.0553665	0.0524396	0.0641169	0.0959381	0.101911	0.0693259	0.04145	0.0594062	0.0819024	0.064529	0.099306	0.0441413	0.0576996	0.0469584	0.0443326	0.0488994	0.0548517	0.0511994	0.0646845	0.0460078	0.0600233	0.0460745
Muong	0.0563194	0.0365222	0.0581724	0.0670727	0.0740523	0.0332498	0.104982	0.0384661	0.0327889	0.0998932	0.0277774	0.0416128	0.0512556	0.0806274	0.0899095	0.0813089	0.0367338	0.0868399	0.0492869	0.0827649	0.241123	0.0455856	0.00876388	0.0161478	0.0107843	0.0388327	0.00398992	0.0145218	0.0168671	0.0290222	0.0672985	0.0590301	0.0264938	0.00525673	0.0204055	0.039669	0.0261348	0.0666368	0.00196465	0.017632	0.00529427	0.00315043	0.00859163	0.0183365	0.0142355	0.0325865	0.00418793	0.0284258	0.00473805
Nung	0.0548175	0.0356136	0.0577782	0.0679487	0.0741218	0.0312649	0.104852	0.0386299	0.0326196	0.0999323	0.0266828	0.0414397	0.0508505	0.0807322	0.0896469	0.0816406	0.0354025	0.0866812	0.0475725	0.0803089	0.243233	0.0437676	0.00724592	0.015406	0.009143	0.0384406	0.00451803	0.0133078	0.0152008	0.0276848	0.0664288	0.056772	0.0250713	0.00579296	0.0208423	0.038456	0.0269665	0.0654059	0.00274524	0.0167713	0.00367281	0.00180033	0.00751158	0.0172613	0.0126561	0.0315914	0.00383423	0.0264879	0.00391297
PaThen	0.0738376	0.0542301	0.0774903	0.0873596	0.0933192	0.051359	0.125099	0.0581845	0.0519026	0.118714	0.0474066	0.0616728	0.06989	0.100954	0.111087	0.101862	0.0542748	0.107599	0.0672253	0.0986669	0.26	0.0630653	0.0286657	0.0362961	0.0295354	0.0589604	0.0323635	0.0356973	0.0351295	0.0480805	0.0847278	0.0839755	0.0525035	0.0308478	0.0475183	0.0658165	0.0543245	0.0846001	0.0288811	0.0392276	0.0299066	0.0278318	0.0340792	0.0379488	0.0330025	0.0516209	0.0266973	0.0444894	0.0302012
PhuLa	0.0572339	0.03783	0.060086	0.0696522	0.0761888	0.0346721	0.107292	0.0411322	0.0354242	0.102173	0.0291977	0.0442502	0.0530539	0.0830979	0.0919866	0.0840558	0.0381597	0.0889589	0.050503	0.0825528	0.244527	0.0466941	0.0121399	0.017225	0.0144701	0.0407643	0.0127179	0.0198777	0.0180409	0.0305953	0.0681188	0.0666648	0.034694	0.0123386	0.0280175	0.0478614	0.0338651	0.066975	0.00971071	0.0214657	0.0125558	0.0102106	0.0128018	0.0203296	0.0166728	0.0346986	0.0111288	0.0272734	0.012361
Sila	0.0767584	0.057077	0.0793688	0.08962	0.0954082	0.055854	0.126806	0.0610267	0.0552546	0.120343	0.0506569	0.0648578	0.0724061	0.102681	0.11368	0.103225	0.0573096	0.109518	0.0697642	0.101538	0.261208	0.0664687	0.0397358	0.0403295	0.0422466	0.0630046	0.0445618	0.0476246	0.0405706	0.0518366	0.0874309	0.0981102	0.0668796	0.0401987	0.0596271	0.0790912	0.0657017	0.088729	0.0396499	0.04425	0.043664	0.0408803	0.0457245	0.042646	0.0387905	0.0550935	0.0415808	0.0457144	0.0430959
Tay	0.0583407	0.0387501	0.0612311	0.0713473	0.0778368	0.0348309	0.10909	0.0417973	0.0358205	0.103684	0.0301102	0.0451382	0.0541215	0.0844879	0.0941002	0.0856211	0.0383085	0.0901835	0.0511184	0.0830901	0.245873	0.0473197	0.0110962	0.0184412	0.0138235	0.0420772	0.00994297	0.0174754	0.0184192	0.0308904	0.0694382	0.0619209	0.0306882	0.010359	0.0261907	0.0441254	0.0315556	0.0678983	0.00782807	0.0204138	0.00878224	0.00704939	0.0127478	0.02005	0.0161713	0.0356309	0.00942715	0.0293152	0.00936021
Mlabri	0.169404	0.155474	0.170075	0.179411	0.183638	0.166994	0.21276	0.157022	0.151447	0.197842	0.164575	0.164257	0.165002	0.193991	0.206697	0.194201	0.160029	0.205651	0.172587	0.20308	0.332756	0.170763	0.154082	0.157263	0.15565	0.166318	0.148251	0.162138	0.156798	0.162811	0.182004	0.205536	0.174793	0.132531	0.160462	0.187728	0.16662	0.195275	0.146356	0.174062	0.144693	0.141462	0.15161	0.158105	0.149866	0.159033	0.146194	0.164301	0.144225
Htin_Mal	0.0870849	0.0697362	0.0871555	0.0956568	0.101107	0.0716757	0.130605	0.0703422	0.0657596	0.123247	0.0657055	0.0744774	0.0814502	0.107687	0.117555	0.109316	0.0724385	0.115738	0.0840859	0.118351	0.263045	0.0820699	0.0529934	0.0568112	0.0527822	0.0717755	0.0468024	0.0592542	0.0578467	0.0668034	0.0985804	0.103547	0.0729116	0.0414944	0.0591708	0.0852851	0.0651826	0.103034	0.0446736	0.0609416	0.0484796	0.0459552	0.05053	0.0592411	0.0557653	0.0678071	0.0484162	0.0662677	0.0478566
[truncated: 33 more columns]

## Sheet: Table S2
Table S2. Pairwise Fst genetic distance between eleven modern Tibetans, Yoruba and other 20 East Asian Neolithic to Bronze/Iron Age reference populations.
Populations	Mbuti	Anatolia_N	Nepal_Mebrak_2125BP	Nepal_Samdzong_1500BP	Russia_Shamanka_Eneolithic	Russia_Shamanka_EBA	Japan_Jomon	Khovsgol_LBA	DevilsCave_N	Tibetan_Gannan	Tibetan_Chamdo	Tibetan_Xunhua	Tibetan_Gangcha	Tibetan_Lhasa	TibetanHO_Yunnan	Tibetan_Nagqu	Tibetan_Yajiang	Tibetan_Shigatse	Tibetan_Xinlong	Tibetan_Shannan	Mongolia_N_North	Boisman_MN	Taiwan_Hanben	Wuzhuangguoliang	Dacaozi_IA	Erdaojingzi_LN	Lajia_LN	Pingliangtai_LN	Wanggou_MN	Xitoucun_LN	Tanshishan_LN	Xiaojingshan_EN
Mbuti	0	0.225435	0.360733	0.284343	0.259524	0.322273	0.325953	0.252155	0.314702	0.230733	0.238567	0.231073	0.233074	0.237471	0.246828	0.23699	0.236952	0.237598	0.237287	0.237018	0.283574	0.288604	0.25556	0.329447	0.309435	0.33471	0.303364	0.293997	0.329998	0.335711	0.350117	0.334696
Anatolia_N	0.225435	0	0.120808	0.126691	0.137828	0.12444	0.17161	0.110544	0.150349	0.0862357	0.126703	0.0554918	0.124231	0.118635	0.100444	0.11515	0.114953	0.121922	0.122149	0.118108	0.148426	0.145156	0.145377	0.122515	0.121183	0.121149	0.13797	0.139062	0.125531	0.127985	0.121095	0.127992
Nepal_Mebrak_2125BP	0.360733	0.120808	0	0.0123438	0.0670583	0.102657	0.25494	0.0457545	0.126956	0.214071	0.210969	0.217981	0.205791	0.210589	0.242001	0.216816	0.214043	0.210598	0.214172	0.209257	0.104954	0.101345	0.073157	0.0610472	0.0222211	0.0236678	0.0610828	0.0596714	0.0329233	0.0651303	0.0600628	0.102048
Nepal_Samdzong_1500BP	0.284343	0.126691	0.0123438	0	0.0557331	0.0640314	0.157898	0.044836	0.0819281	0.0641049	0.0851279	0.025142	0.0882633	0.0757422	0.0665175	0.0772055	0.0800104	0.0784281	0.0847387	0.0758035	0.0739884	0.0697593	0.0629818	0.0270635	0.023751	0.0285707	0.0409042	0.0450247	0.0317817	0.062589	0.0564883	0.0562963
Russia_Shamanka_Eneolithic	0.259524	0.137828	0.0670583	0.0557331	0	0.0433158	0.144828	0.0303844	0.0659746	0.0223821	0.0532839	-0.0138168	0.0552414	0.048679	0.0271745	0.0432693	0.0432813	0.0517203	0.0477646	0.0494216	0.0337721	0.0530047	0.0739834	0.0474171	0.0440326	0.0513446	0.0551567	0.0603321	0.0543427	0.0838168	0.0830128	0.0663517
Russia_Shamanka_EBA	0.322273	0.12444	0.102657	0.0640314	0.0433158	0	0.211786	0.0252243	0.112024	0.149643	0.16524	0.133083	0.158853	0.164945	0.168373	0.164923	0.160185	0.16705	0.162224	0.166398	0.0768532	0.0883173	0.0873363	0.0799504	0.0580846	0.069646	0.0802722	0.081843	0.0753813	0.104599	0.106668	0.103413
Japan_Jomon	0.325953	0.17161	0.25494	0.157898	0.144828	0.211786	0	0.130912	0.199273	0.170458	0.183959	0.15858	0.17741	0.183529	0.189542	0.183635	0.180802	0.184727	0.178588	0.183259	0.173917	0.162296	0.129632	0.204803	0.171525	0.208018	0.178535	0.165948	0.20208	0.222585	0.240662	0.225184
Khovsgol_LBA	0.252155	0.110544	0.0457545	0.044836	0.0303844	0.0252243	0.130912	0	0.0655059	0.0278064	0.0607576	-0.00826625	0.0620967	0.0553345	0.0346356	0.0504005	0.0503589	0.0581806	0.0557657	0.0564473	0.0386482	0.0471247	0.0660103	0.0272989	0.0310837	0.0321288	0.0471435	0.0513523	0.0367962	0.0556467	0.0517247	0.0417423
DevilsCave_N	0.314702	0.150349	0.126956	0.0819281	0.0659746	0.112024	0.199273	0.0655059	0	0.116103	0.136502	0.0936146	0.132999	0.136881	0.13311	0.134731	0.131431	0.138456	0.131782	0.136598	0.0967892	0.0530363	0.0875365	0.0955876	0.0783693	0.093513	0.0918932	0.0855252	0.0975581	0.125827	0.131087	0.108983
Tibetan_Gannan	0.230733	0.0862357	0.214071	0.0641049	0.0223821	0.149643	0.170458	0.0278064	0.116103	0	0.00824311	0.00143815	0.00513232	0.00953737	0.0215474	0.00919003	0.00445348	0.0112297	0.00261604	0.011545	0.0653234	0.0681112	0.00952362	0.137558	0.0998116	0.154613	0.0883091	0.0698235	0.145289	0.177771	0.205191	0.165395
Tibetan_Chamdo	0.238567	0.126703	0.210969	0.0851279	0.0532839	0.16524	0.183959	0.0607576	0.136502	0.00824311	0	0.00383338	0.00153534	0.00211387	0.016949	4.92e-05	0.0023993	0.00407972	0.0044879	0.00379924	0.0884887	0.0944025	0.0480053	0.151207	0.122107	0.168267	0.109097	0.0978076	0.159013	0.194437	0.216595	0.17888
Tibetan_Xunhua	0.231073	0.0554918	0.217981	0.025142	-0.0138168	0.133083	0.15858	-0.00826625	0.0936146	0.00143815	0.00383338	0	0.00309693	0.00745875	0.0209361	0.00597577	0.00356633	0.00774401	0.00171517	0.0083502	0.0325301	0.0407658	-0.0211742	0.127461	0.0759922	0.144722	0.0608429	0.0384675	0.131259	0.169551	0.205717	0.156354
Tibetan_Gangcha	0.233074	0.124231	0.205791	0.0882633	0.0552414	0.158853	0.17741	0.0620967	0.132999	0.00513232	0.00153534	0.00309693	0	0.00384128	0.0167568	0.00170096	0.00351929	0.00446542	0.00345994	0.00454128	0.0879703	0.0927567	0.0510236	0.147995	0.120332	0.163232	0.109561	0.0982019	0.154915	0.186862	0.208273	0.172686
Tibetan_Lhasa	0.237471	0.118635	0.210589	0.0757422	0.048679	0.164945	0.183529	0.0553345	0.136881	0.00953737	0.00211387	0.00745875	0.00384128	0	0.0204741	0.000788663	0.0067839	0.000935768	0.00743025	0.000260441	0.0854617	0.0911012	0.0426527	0.150728	0.121488	0.170254	0.109069	0.0969647	0.160676	0.194853	0.218507	0.180102
TibetanHO_Yunnan	0.246828	0.100444	0.242001	0.0665175	0.0271745	0.168373	0.189542	0.0346356	0.13311	0.0215474	0.016949	0.0209361	0.0167568	0.0204741	0	0.0187426	0.0175245	0.0218368	0.018065	0.0216157	0.0718085	0.0806695	0.018059	0.160735	0.116646	0.177894	0.0989093	0.0792855	0.165955	0.204294	0.238218	0.189733
Tibetan_Nagqu	0.23699	0.11515	0.216816	0.0772055	0.0432693	0.164923	0.183635	0.0504005	0.134731	0.00919003	4.92e-05	0.00597577	0.00170096	0.000788663	0.0187426	0	0.00293107	0.00192996	0.0043939	0.00190125	0.0810555	0.0893788	0.0378191	0.153196	0.119897	0.17077	0.105922	0.0932234	0.160125	0.196208	0.219774	0.180892
Tibetan_Yajiang	0.236952	0.114953	0.214043	0.0800104	0.0432813	0.160185	0.180802	0.0503589	0.131431	0.00445348	0.0023993	0.00356633	0.00351929	0.0067839	0.0175245	0.00293107	0	0.00760325	0.00155419	0.00736847	0.0812113	0.0859914	0.0343831	0.149238	0.115822	0.16363	0.102941	0.0883014	0.152968	0.187488	0.212066	0.17473
Tibetan_Shigatse	0.237598	0.121922	0.210598	0.0784281	0.0517203	0.16705	0.184727	0.0581806	0.138456	0.0112297	0.00407972	0.00774401	0.00446542	0.000935768	0.0218368	0.00192996	0.00760325	0	0.00807591	0.00140135	0.0882224	0.0944494	0.0464052	0.152743	0.124175	0.171406	0.111722	0.0987969	0.16136	0.195627	0.218734	0.180744
Tibetan_Xinlong	0.237287	0.122149	0.214172	0.0847387	0.0477646	0.162224	0.178588	0.0557657	0.131782	0.00261604	0.0044879	0.00171517	0.00345994	0.00743025	0.018065	0.0043939	0.00155419	0.00807591	0	0.00845266	0.084705	0.087562	0.0319131	0.145811	0.116382	0.162467	0.104962	0.0880119	0.153148	0.183103	0.207337	0.172826
Tibetan_Shannan	0.237018	0.118108	0.209257	0.0758035	0.0494216	0.166398	0.183259	0.0564473	0.136598	0.011545	0.00379924	0.0083502	0.00454128	0.000260441	0.0216157	0.00190125	0.00736847	0.00140135	0.00845266	0	0.0871072	0.0928185	0.0442142	0.151984	0.122508	0.170352	0.109771	0.097304	0.160886	0.194995	0.219797	0.181013
Mongolia_N_North	0.283574	0.148426	0.104954	0.0739884	0.0337721	0.0768532	0.173917	0.0386482	0.0967892	0.0653234	0.0884887	0.0325301	0.0879703	0.0854617	0.0718085	0.0810555	0.0812113	0.0882224	0.084705	0.0871072	0	0.0690881	0.0823907	0.0760006	0.068386	0.0788402	0.0766483	0.0797256	0.0831372	0.109745	0.112004	0.0886949
Boisman_MN	0.288604	0.145156	0.101345	0.0697593	0.0530047	0.0883173	0.162296	0.0471247	0.0530363	0.0681112	0.0944025	0.0407658	0.0927567	0.0911012	0.0806695	0.0893788	0.0859914	0.0944494	0.087562	0.0928185	0.0690881	0	0.069782	0.0720525	0.0610476	0.071734	0.0733377	0.069792	0.0742805	0.0929275	0.0981349	0.0776668
Taiwan_Hanben	0.25556	0.145377	0.073157	0.0629818	0.0739834	0.0873363	0.129632	0.0660103	0.0875365	0.00952362	0.0480053	-0.0211742	0.0510236	0.0426527	0.018059	0.0378191	0.0343831	0.0464052	0.0319131	0.0442142	0.0823907	0.069782	0	0.0540276	0.0420534	0.047262	0.0643369	0.0520931	0.054368	0.0332116	0.0315217	0.0597721
Wuzhuangguoliang	0.329447	0.122515	0.0610472	0.0270635	0.0474171	0.0799504	0.204803	0.0272989	0.0955876	0.137558	0.151207	0.127461	0.147995	0.150728	0.160735	0.153196	0.149238	0.152743	0.145811	0.151984	0.0760006	0.0720525	0.0540276	0	0.0131581	0.0142067	0.0505152	0.03334	0.0282401	0.0480689	0.0796109	0.0688143
Dacaozi_IA	0.309435	0.121183	0.0222211	0.023751	0.0440326	0.0580846	0.171525	0.0310837	0.0783693	0.0998116	0.122107	0.0759922	0.120332	0.121488	0.116646	0.119897	0.115822	0.124175	0.116382	0.122508	0.068386	0.0610476	0.0420534	0.0131581	0	0.0064357	0.0309544	0.0250034	0.0103693	0.0421081	0.0345202	0.0417218
Erdaojingzi_LN	0.33471	0.121149	0.0236678	0.0285707	0.0513446	0.069646	0.208018	0.0321288	0.093513	0.154613	0.168267	0.144722	0.163232	0.170254	0.177894	0.17077	0.16363	0.171406	0.162467	0.170352	0.0788402	0.071734	0.047262	0.0142067	0.0064357	0	0.0403337	0.0324776	0.00834928	0.0413407	0.033048	0.0446155
Lajia_LN	0.303364	0.13797	0.0610828	0.0409042	0.0551567	0.0802722	0.178535	0.0471435	0.0918932	0.0883091	0.109097	0.0608429	0.109561	0.109069	0.0989093	0.105922	0.102941	0.111722	0.104962	0.109771	0.0766483	0.0733377	0.0643369	0.0505152	0.0309544	0.0403337	0	0.0470371	0.0414272	0.0831777	0.0860612	0.068436
Pingliangtai_LN	0.293997	0.139062	0.0596714	0.0450247	0.0603321	0.081843	0.165948	0.0513523	0.0855252	0.0698235	0.0978076	0.0384675	0.0982019	0.0969647	0.0792855	0.0932234	0.0883014	0.0987969	0.0880119	0.097304	0.0797256	0.069792	0.0520931	0.03334	0.0250034	0.0324776	0.0470371	0	0.0329348	0.0655943	0.0635303	0.06177
Wanggou_MN	0.329998	0.125531	0.0329233	0.0317817	0.0543427	0.0753813	0.20208	0.0367962	0.0975581	0.145289	0.159013	0.131259	0.154915	0.160676	0.165955	0.160125	0.152968	0.16136	0.153148	0.160886	0.0831372	0.0742805	0.054368	0.0282401	0.0103693	0.00834928	0.0414272	0.0329348	0	0.052455	0.052495	0.0553209
Xitoucun_LN	0.335711	0.127985	0.0651303	0.062589	0.0838168	0.104599	0.222585	0.0556467	0.125827	0.177771	0.194437	0.169551	0.186862	0.194853	0.204294	0.196208	0.187488	0.195627	0.183103	0.194995	0.109745	0.0929275	0.0332116	0.0480689	0.0421081	0.0413407	0.0831777	0.0655943	0.052455	0	0.00835845	0.0609732
Tanshishan_LN	0.350117	0.121095	0.0600628	0.0564883	0.0830128	0.106668	0.240662	0.0517247	0.131087	0.205191	0.216595	0.205717	0.208273	0.218507	0.238218	0.219774	0.212066	0.218734	0.207337	0.219797	0.112004	0.0981349	0.0315217	0.0796109	0.0345202	0.033048	0.0860612	0.0635303	0.052495	0.00835845	0	0.0705981
Xiaojingshan_EN	0.334696	0.127992	0.102048	0.0562963	0.0663517	0.103413	0.225184	0.0417423	0.108983	0.165395	0.17888	0.156354	0.172686	0.180102	0.189733	0.180892	0.17473	0.180744	0.172826	0.181013	0.0886949	0.0776668	0.0597721	0.0688143	0.0417218	0.0446155	0.068436	0.06177	0.0553209	0.0609732	0.0705981	0

## Sheet: Table S3
Table S3. The results of outgroup-f3(Modern Tibetans/other 278 Eurasian modern and Ancient population, Modern Tibetans/other 278 Eurasian modern and Ancient population; Mbuti)
Populations	Group	Cambodian	Htin_Mal	KhoMu	Kinh_HGDP	Kinh_HoChiMinh1K	Kinh_Vietnam	Mang	Mlabri	Muong	Vietnamese	Ami	Atayal	Cham	Dusun	Ede	Giarai	Ilocano	Kankanaey	Malay	Murut	Tagalog	Visayan	Abazin	Abkhasian	Adygei	Circassian	Ingushian	Kabardinian	Kubachinian	Lak	Chukchi	Koryak	Aleut	Eskimo_ChaplinSireniki	Eskimo_Naukan	Dao	Hmong	Miao_HGDP	PaThen	She_HGDP	Kurd	Ossetian	Russian	Russian_HGDP	Russian_Krasnoborsky	Russian_Leshukonsky	Russian_Pinezhsky	Tajik
Cambodian	Austroasiatic	0	0.299478	0.298623	0.298631	0.299075	0.299206	0.297993	0.299235	0.299881	0.2996	0.299917	0.298715	0.292433	0.298529	0.294538	0.295364	0.295824	0.298831	0.291896	0.299984	0.291845	0.291889	0.23655	0.231654	0.234187	0.235402	0.234581	0.235659	0.233201	0.233854	0.27862	0.280174	0.252441	0.278761	0.277549	0.299814	0.298796	0.297811	0.298097	0.297919	0.229631	0.235135	0.235256	0.238211	0.23955	0.241298	0.240195	0.238866
Htin_Mal	Austroasiatic	0.299478	0	0.305977	0.304367	0.304577	0.304826	0.305555	0.308747	0.305945	0.30484	0.303973	0.303533	0.29786	0.303763	0.301029	0.301887	0.300574	0.303518	0.29764	0.305353	0.295715	0.295935	0.236297	0.230754	0.233389	0.234968	0.233654	0.235337	0.231951	0.232592	0.2814	0.283157	0.252543	0.281324	0.280465	0.305791	0.304345	0.303387	0.303884	0.302706	0.228345	0.234489	0.234333	0.237603	0.23869	0.240953	0.239453	0.238409
KhoMu	Austroasiatic	0.298623	0.305977	0	0.304103	0.304322	0.304436	0.304907	0.305793	0.305721	0.304485	0.30464	0.303745	0.297061	0.303382	0.299027	0.299955	0.300032	0.303332	0.296454	0.304748	0.295951	0.296058	0.235698	0.22987	0.23277	0.234428	0.233176	0.234502	0.232035	0.232267	0.282633	0.284359	0.252811	0.282995	0.281787	0.30536	0.304359	0.303341	0.303478	0.303533	0.228668	0.233934	0.233754	0.237173	0.238087	0.240602	0.239015	0.237953
Kinh_HGDP	Austroasiatic	0.298631	0.304367	0.304103	0	0.31137	0.309188	0.304681	0.302315	0.309268	0.309224	0.31052	0.309127	0.297952	0.306369	0.297826	0.298095	0.306178	0.309836	0.297082	0.308167	0.300976	0.301241	0.237714	0.231547	0.23454	0.23604	0.234967	0.236474	0.233342	0.234207	0.286686	0.288672	0.255564	0.287318	0.285747	0.310333	0.308967	0.308555	0.309133	0.309497	0.229389	0.235836	0.235443	0.239013	0.240186	0.242529	0.240966	0.239417
Kinh_HoChiMinh1K	Austroasiatic	0.299075	0.304577	0.304322	0.31137	0	0.309551	0.304888	0.302729	0.309831	0.309757	0.310858	0.309841	0.298157	0.306739	0.29823	0.298545	0.306406	0.310156	0.297305	0.308464	0.301203	0.301363	0.237886	0.231926	0.234787	0.236425	0.235338	0.236923	0.233698	0.234295	0.286993	0.288908	0.255977	0.287487	0.286215	0.310592	0.309305	0.308785	0.308982	0.309675	0.229962	0.235978	0.235709	0.239336	0.240455	0.242832	0.241247	0.23982
Kinh_Vietnam	Austroasiatic	0.299206	0.304826	0.304436	0.309188	0.309551	0	0.30494	0.302445	0.31003	0.309967	0.311633	0.310111	0.298351	0.306858	0.298145	0.298366	0.30714	0.31049	0.297217	0.308432	0.301457	0.301983	0.237865	0.231673	0.234399	0.236175	0.234826	0.236584	0.233462	0.234011	0.286822	0.288797	0.255503	0.287422	0.28613	0.310966	0.309636	0.309135	0.309046	0.309964	0.22966	0.235811	0.235499	0.239125	0.240403	0.242549	0.241233	0.239466
Mang	Austroasiatic	0.297993	0.305555	0.304907	0.304681	0.304888	0.30494	0	0.305316	0.305746	0.304926	0.305614	0.303775	0.296578	0.303363	0.298538	0.299003	0.300225	0.304909	0.295952	0.305437	0.297078	0.296789	0.236596	0.230154	0.233532	0.235203	0.233669	0.235094	0.232629	0.232851	0.283802	0.285496	0.253732	0.283902	0.283095	0.306366	0.305222	0.30473	0.304504	0.304642	0.228682	0.234686	0.234593	0.237986	0.23862	0.241257	0.239636	0.238019
Mlabri	Austroasiatic	0.299235	0.308747	0.305793	0.302315	0.302729	0.302445	0.305316	0	0.304644	0.303219	0.302024	0.301446	0.297496	0.302272	0.301349	0.302744	0.299143	0.301242	0.296717	0.303972	0.294094	0.294394	0.235552	0.229625	0.232206	0.234081	0.232667	0.234419	0.231301	0.231776	0.279366	0.2809	0.251001	0.27976	0.278375	0.303909	0.301936	0.300854	0.3011	0.300031	0.227439	0.233216	0.233553	0.237024	0.238259	0.240342	0.238315	0.237345
Muong	Austroasiatic	0.299881	0.305945	0.305721	0.309268	0.309831	0.31003	0.305746	0.304644	0	0.310479	0.311712	0.310466	0.299428	0.30753	0.299443	0.299846	0.306964	0.310895	0.298052	0.309308	0.301492	0.301956	0.236185	0.230109	0.233096	0.234598	0.233325	0.235189	0.231832	0.232205	0.28546	0.287233	0.25395	0.285485	0.284581	0.311713	0.309705	0.308802	0.309451	0.30967	0.228237	0.234117	0.233818	0.237518	0.238646	0.240859	0.23904	0.238138
Vietnamese	Austroasiatic	0.2996	0.30484	0.304485	0.309224	0.309757	0.309967	0.304926	0.303219	0.310479	0	0.311357	0.310233	0.298286	0.307398	0.29836	0.298693	0.307283	0.310681	0.29755	0.309005	0.301473	0.301947	0.237771	0.231555	0.234636	0.235994	0.234962	0.23661	0.233341	0.234169	0.287333	0.289351	0.255963	0.28782	0.286393	0.311113	0.309966	0.309506	0.309741	0.309963	0.229429	0.23574	0.235418	0.239047	0.240377	0.242629	0.241174	0.239563
Ami	Austronesian	0.299917	0.303973	0.30464	0.31052	0.310858	0.311633	0.305614	0.302024	0.311712	0.311357	0	0.32458	0.299427	0.316575	0.298355	0.29859	0.320936	0.325275	0.301535	0.318881	0.310784	0.312931	0.237572	0.231574	0.234414	0.235843	0.234754	0.236559	0.233193	0.233789	0.28795	0.289759	0.255878	0.287916	0.286515	0.313237	0.311445	0.310513	0.311338	0.312125	0.229264	0.235548	0.235299	0.239043	0.239719	0.242529	0.240904	0.239311
Atayal	Austronesian	0.298715	0.303533	0.303745	0.309127	0.309841	0.310111	0.303775	0.301446	0.310466	0.310233	0.32458	0	0.298067	0.314503	0.29767	0.29811	0.318446	0.323044	0.300414	0.316859	0.309088	0.310634	0.237591	0.231263	0.234291	0.236095	0.234558	0.23661	0.233232	0.233604	0.287465	0.289569	0.25622	0.288125	0.286621	0.311846	0.310592	0.30926	0.310314	0.311079	0.229435	0.235394	0.235076	0.238564	0.239623	0.242061	0.239995	0.239059
Cham	Austronesian	0.292433	0.29786	0.297061	0.297952	0.298157	0.298351	0.296578	0.297496	0.299428	0.298286	0.299427	0.298067	0	0.29768	0.293213	0.29382	0.2957	0.298562	0.290807	0.298816	0.2908	0.291375	0.237371	0.232417	0.234945	0.236267	0.235443	0.236794	0.234324	0.234823	0.278235	0.279683	0.252634	0.278731	0.277413	0.298968	0.297731	0.296852	0.296967	0.297265	0.230608	0.235939	0.235922	0.23903	0.239941	0.241424	0.24059	0.239706
Dusun	Austronesian	0.298529	0.303763	0.303382	0.306369	0.306739	0.306858	0.303363	0.302272	0.30753	0.307398	0.316575	0.314503	0.29768	0	0.298066	0.298608	0.313017	0.316746	0.299771	0.314863	0.30461	0.307265	0.236514	0.230736	0.233673	0.235408	0.234075	0.235448	0.232858	0.233595	0.283921	0.286171	0.253865	0.284262	0.28295	0.308356	0.306701	0.305898	0.306551	0.306591	0.229187	0.234807	0.234645	0.238057	0.238816	0.241738	0.240001	0.238434
Ede	Austronesian	0.294538	0.301029	0.299027	0.297826	0.29823	0.298145	0.298538	0.301349	0.299443	0.29836	0.298355	0.29767	0.293213	0.298066	0	0.298511	0.294775	0.297546	0.292568	0.2994	0.290678	0.290886	0.236241	0.230918	0.233521	0.235128	0.233775	0.235197	0.232662	0.233394	0.276446	0.27821	0.250933	0.276821	0.275357	0.298562	0.297347	0.296061	0.296612	0.295822	0.229258	0.234518	0.23455	0.237476	0.238685	0.240235	0.239213	0.238377
Giarai	Austronesian	0.295364	0.301887	0.299955	0.298095	0.298545	0.298366	0.299003	0.302744	0.299846	0.298693	0.29859	0.29811	0.29382	0.298608	0.298511	0	0.294732	0.297819	0.293171	0.300274	0.290963	0.291455	0.236661	0.231509	0.234111	0.235549	0.234402	0.235779	0.233425	0.233778	0.277058	0.278818	0.251534	0.277789	0.276476	0.299083	0.297501	0.296053	0.297036	0.296115	0.229598	0.234951	0.235255	0.238188	0.239433	0.240594	0.239916	0.238908
Ilocano	Austronesian	0.295824	0.300574	0.300032	0.306178	0.306406	0.30714	0.300225	0.299143	0.306964	0.307283	0.320936	0.318446	0.2957	0.313017	0.294775	0.294732	0	0.321302	0.298307	0.314286	0.3077	0.309159	0.235765	0.229825	0.23301	0.234882	0.233371	0.235133	0.232294	0.232856	0.285171	0.287544	0.253802	0.28549	0.28323	0.308576	0.307153	0.30651	0.305935	0.307603	0.227992	0.233912	0.233859	0.237187	0.237997	0.240312	0.239508	0.237775
Kankanaey	Austronesian	0.298831	0.303518	0.303332	0.309836	0.310156	0.31049	0.304909	0.301242	0.310895	0.310681	0.325275	0.323044	0.298562	0.316746	0.297546	0.297819	0.321302	0	0.30167	0.319135	0.311139	0.313906	0.237327	0.230984	0.234045	0.235803	0.234329	0.23651	0.232911	0.233532	0.287231	0.289306	0.255572	0.287798	0.285906	0.312289	0.310602	0.310088	0.310333	0.311251	0.229114	0.235508	0.23503	0.238431	0.239535	0.241944	0.2408	0.239121
Malay	Austronesian	0.291896	0.29764	0.296454	0.297082	0.297305	0.297217	0.295952	0.296717	0.298052	0.29755	0.301535	0.300414	0.290807	0.299771	0.292568	0.293171	0.298307	0.30167	0	0.301281	0.293106	0.294592	0.237038	0.231983	0.234783	0.236053	0.235243	0.236211	0.233873	0.234298	0.277803	0.279447	0.252158	0.278233	0.277182	0.297668	0.297119	0.296078	0.296433	0.296226	0.230604	0.235734	0.23559	0.238794	0.239705	0.241132	0.24038	0.239325
Murut	Austronesian	0.299984	0.305353	0.304748	0.308167	0.308464	0.308432	0.305437	0.303972	0.309308	0.309005	0.318881	0.316859	0.298816	0.314863	0.2994	0.300274	0.314286	0.319135	0.301281	0	0.30623	0.308715	0.237624	0.231068	0.234136	0.235717	0.234551	0.23588	0.233195	0.233724	0.285228	0.287451	0.254502	0.285791	0.284307	0.309702	0.308476	0.307369	0.307754	0.307974	0.229189	0.235426	0.235026	0.238367	0.239446	0.242072	0.240748	0.23946
Tagalog	Austronesian	0.291845	0.295715	0.295951	0.300976	0.301203	0.301457	0.297078	0.294094	0.301492	0.301473	0.310784	0.309088	0.2908	0.30461	0.290678	0.290963	0.3077	0.311139	0.293106	0.30623	0	0.301927	0.237289	0.231385	0.234515	0.235994	0.234749	0.236431	0.233276	0.233783	0.282112	0.283253	0.253858	0.282252	0.281397	0.302666	0.30162	0.300982	0.300998	0.30242	0.230031	0.235559	0.235584	0.238818	0.239625	0.242224	0.240657	0.238756
Visayan	Austronesian	0.291889	0.295935	0.296058	0.301241	0.301363	0.301983	0.296789	0.294394	0.301956	0.301947	0.312931	0.310634	0.291375	0.307265	0.290886	0.291455	0.309159	0.313906	0.294592	0.308715	0.301927	0	0.235221	0.229205	0.232093	0.233522	0.232139	0.233865	0.231096	0.231639	0.28134	0.283378	0.252671	0.282556	0.280653	0.302838	0.301907	0.30118	0.301204	0.301875	0.227265	0.233363	0.233225	0.236701	0.237638	0.240184	0.238477	0.237129
Abazin	Caucasian	0.23655	0.236297	0.235698	0.237714	0.237886	0.237865	0.236596	0.235552	0.236185	0.237771	0.237572	0.237591	0.237371	0.236514	0.236241	0.236661	0.235765	0.237327	0.237038	0.237624	0.237289	0.235221	0	0.266792	0.266162	0.265181	0.265561	0.264547	0.265497	0.265066	0.244675	0.243379	0.258696	0.244711	0.244037	0.237753	0.237966	0.237972	0.236822	0.23801	0.261045	0.264768	0.266055	0.264513	0.264544	0.263058	0.263711	0.259854
Abkhasian	Caucasian	0.231654	0.230754	0.22987	0.231547	0.231926	0.231673	0.230154	0.229625	0.230109	0.231555	0.231574	0.231263	0.232417	0.230736	0.230918	0.231509	0.229825	0.230984	0.231983	0.231068	0.231385	0.229205	0.266792	0	0.267907	0.266702	0.267386	0.266163	0.267936	0.267165	0.238119	0.236523	0.256065	0.238064	0.237746	0.230986	0.23134	0.231339	0.230646	0.231461	0.263485	0.266986	0.26606	0.264214	0.264001	0.261855	0.262893	0.260155
Adygei	Caucasian	0.234187	0.233389	0.23277	0.23454	0.234787	0.234399	0.233532	0.232206	0.233096	0.234636	0.234414	0.234291	0.234945	0.233673	0.233521	0.234111	0.23301	0.234045	0.234783	0.234136	0.234515	0.232093	0.266162	0.267907	0	0.266306	0.266483	0.265756	0.267325	0.26698	0.24164	0.240303	0.258056	0.241648	0.241226	0.23431	0.234507	0.234392	0.233704	0.234723	0.262337	0.265812	0.267055	0.265364	0.265247	0.263341	0.26444	0.260664
Circassian	Caucasian	0.235402	0.234968	0.234428	0.23604	0.236425	0.236175	0.235203	0.234081	0.234598	0.235994	0.235843	0.236095	0.236267	0.235408	0.235128	0.235549	0.234882	0.235803	0.236053	0.235717	0.235994	0.233522	0.265181	0.266702	0.266306	0	0.265739	0.264985	0.266493	0.265579	0.243453	0.241924	0.258092	0.243106	0.243211	0.236165	0.236244	0.236393	0.235794	0.236385	0.2612	0.265347	0.266191	0.264742	0.264967	0.262573	0.26335	0.259823
Ingushian	Caucasian	0.234581	0.233654	0.233176	0.234967	0.235338	0.234826	0.233669	0.232667	0.233325	0.234962	0.234754	0.234558	0.235443	0.234075	0.233775	0.234402	0.233371	0.234329	0.235243	0.234551	0.234749	0.232139	0.265561	0.267386	0.266483	0.265739	0	0.265232	0.268271	0.267902	0.242492	0.240832	0.25871	0.242374	0.24228	0.23456	0.235187	0.235086	0.234179	0.23547	0.262749	0.266436	0.267353	0.265753	0.265778	0.263865	0.264831	0.261261
Kabardinian	Caucasian	0.235659	0.235337	0.234502	0.236474	0.236923	0.236584	0.235094	0.234419	0.235189	0.23661	0.236559	0.23661	0.236794	0.235448	0.235197	0.235779	0.235133	0.23651	0.236211	0.23588	0.236431	0.233865	0.264547	0.266163	0.265756	0.264985	0.265232	0	0.26575	0.265368	0.243872	0.242509	0.258447	0.243424	0.243343	0.236331	0.236698	0.236635	0.235897	0.236888	0.26119	0.26478	0.266354	0.264869	0.264571	0.26271	0.263886	0.259576
Kubachinian	Caucasian	0.233201	0.231951	0.232035	0.233342	0.233698	0.233462	0.232629	0.231301	0.231832	0.233341	0.233193	0.233232	0.234324	0.232858	0.232662	0.233425	0.232294	0.232911	0.233873	0.233195	0.233276	0.231096	0.265497	0.267936	0.267325	0.266493	0.268271	0.26575	0	0.272416	0.242702	0.240725	0.259558	0.242547	0.242462	0.233138	0.233072	0.233464	0.232777	0.233373	0.263275	0.26634	0.268948	0.267464	0.266812	0.265559	0.266298	0.26351
Lak	Caucasian	0.233854	0.232592	0.232267	0.234207	0.234295	0.234011	0.232851	0.231776	0.232205	0.234169	0.233789	0.233604	0.234823	0.233595	0.233394	0.233778	0.232856	0.233532	0.234298	0.233724	0.233783	0.231639	0.265066	0.267165	0.26698	0.265579	0.267902	0.265368	0.272416	0	0.242769	0.240913	0.259719	0.242754	0.24253	0.233759	0.233895	0.233981	0.233385	0.23399	0.263136	0.266057	0.26852	0.267008	0.266795	0.265351	0.266455	0.262723
Chukchi	Chukotko_Kamchatkan	0.27862	0.2814	0.282633	0.286686	0.286993	0.286822	0.283802	0.279366	0.28546	0.287333	0.28795	0.287465	0.278235	0.283921	0.276446	0.277058	0.285171	0.287231	0.277803	0.285228	0.282112	0.28134	0.244675	0.238119	0.24164	0.243453	0.242492	0.243872	0.242702	0.242769	0	0.329194	0.274134	0.331701	0.330998	0.288453	0.288947	0.29014	0.288396	0.29082	0.235842	0.242685	0.245109	0.249773	0.250285	0.254099	0.252184	0.24718
Koryak	Chukotko_Kamchatkan	0.280174	0.283157	0.284359	0.288672	0.288908	0.288797	0.285496	0.2809	0.287233	0.289351	0.289759	0.289569	0.279683	0.286171	0.27821	0.278818	0.287544	0.289306	0.279447	0.287451	0.283253	0.283378	0.243379	0.236523	0.240303	0.241924	0.240832	0.242509	0.240725	0.240913	0.329194	0	0.269904	0.323248	0.319288	0.290602	0.291265	0.29215	0.290299	0.293188	0.234857	0.241334	0.243272	0.248024	0.248668	0.252328	0.250764	0.245859
Aleut	Eskimo_Aleut	0.252441	0.252543	0.252811	0.255564	0.255977	0.255503	0.253732	0.251001	0.25395	0.255963	0.255878	0.25622	0.252634	0.253865	0.250933	0.251534	0.253802	0.255572	0.252158	0.254502	0.253858	0.252671	0.258696	0.256065	0.258056	0.258092	0.25871	0.258447	0.259558	0.259719	0.274134	0.269904	0	0.277184	0.277468	0.256255	0.256582	0.256929	0.255902	0.257003	0.252887	0.257712	0.266468	0.267205	0.267227	0.267388	0.268282	0.258614
Eskimo_ChaplinSireniki	Eskimo_Aleut	0.278761	0.281324	0.282995	0.287318	0.287487	0.287422	0.283902	0.27976	0.285485	0.28782	0.287916	0.288125	0.278731	0.284262	0.276821	0.277789	0.28549	0.287798	0.278233	0.285791	0.282252	0.282556	0.244711	0.238064	0.241648	0.243106	0.242374	0.243424	0.242547	0.242754	0.331701	0.323248	0.277184	0	0.339494	0.288815	0.289607	0.290481	0.288613	0.291257	0.236063	0.242624	0.244802	0.249496	0.249676	0.253105	0.251833	0.247569
Eskimo_Naukan	Eskimo_Aleut	0.277549	0.280465	0.281787	0.285747	0.286215	0.28613	0.283095	0.278375	0.284581	0.286393	0.286515	0.286621	0.277413	0.28295	0.275357	0.276476	0.28323	0.285906	0.277182	0.284307	0.281397	0.280653	0.244037	0.237746	0.241226	0.243211	0.24228	0.243343	0.242462	0.24253	0.330998	0.319288	0.277468	0.339494	0	0.2873	0.287954	0.289027	0.287443	0.289949	0.236066	0.242049	0.244655	0.249343	0.249743	0.253502	0.252075	0.247213
Dao	Hmong_Mien	0.299814	0.305791	0.30536	0.310333	0.310592	0.310966	0.306366	0.303909	0.311713	0.311113	0.313237	0.311846	0.298968	0.308356	0.298562	0.299083	0.308576	0.312289	0.297668	0.309702	0.302666	0.302838	0.237753	0.230986	0.23431	0.236165	0.23456	0.236331	0.233138	0.233759	0.288453	0.290602	0.256255	0.288815	0.2873	0	0.313953	0.311464	0.312256	0.311549	0.229279	0.235406	0.235173	0.238919	0.240123	0.24254	0.240902	0.239259
Hmong	Hmong_Mien	0.298796	0.304345	0.304359	0.308967	0.309305	0.309636	0.305222	0.301936	0.309705	0.309966	0.311445	0.310592	0.297731	0.306701	0.297347	0.297501	0.307153	0.310602	0.297119	0.308476	0.30162	0.301907	0.237966	0.23134	0.234507	0.236244	0.235187	0.236698	0.233072	0.233895	0.288947	0.291265	0.256582	0.289607	0.287954	0.313953	0	0.314721	0.317314	0.313038	0.229726	0.235617	0.235491	0.239133	0.240346	0.24277	0.241365	0.239495
Miao_HGDP	Hmong_Mien	0.297811	0.303387	0.303341	0.308555	0.308785	0.309135	0.30473	0.300854	0.308802	0.309506	0.310513	0.30926	0.296852	0.305898	0.296061	0.296053	0.30651	0.310088	0.296078	0.307369	0.300982	0.30118	0.237972	0.231339	0.234392	0.236393	0.235086	0.236635	0.233464	0.233981	0.29014	0.29215	0.256929	0.290481	0.289027	0.311464	0.314721	0	0.312077	0.312021	0.229737	0.235687	0.235574	0.239442	0.240729	0.243165	0.24127	0.239648
PaThen	Hmong_Mien	0.298097	0.303884	0.303478	0.309133	0.308982	0.309046	0.304504	0.3011	0.309451	0.309741	0.311338	0.310314	0.296967	0.306551	0.296612	0.297036	0.305935	0.310333	0.296433	0.307754	0.300998	0.301204	0.236822	0.230646	0.233704	0.235794	0.234179	0.235897	0.232777	0.233385	0.288396	0.290299	0.255902	0.288613	0.287443	0.312256	0.317314	0.312077	0	0.311727	0.228531	0.234815	0.234591	0.238382	0.23927	0.241867	0.240712	0.238602
She_HGDP	Hmong_Mien	0.297919	0.302706	0.303533	0.309497	0.309675	0.309964	0.304642	0.300031	0.30967	0.309963	0.312125	0.311079	0.297265	0.306591	0.295822	0.296115	0.307603	0.311251	0.296226	0.307974	0.30242	0.301875	0.23801	0.231461	0.234723	0.236385	0.23547	0.236888	0.233373	0.23399	0.29082	0.293188	0.257003	0.291257	0.289949	0.311549	0.313038	0.312021	0.311727	0	0.229752	0.235989	0.235655	0.239435	0.24053	0.242975	0.241443	0.240064
Kurd	Indo_European	0.229631	0.228345	0.228668	0.229389	0.229962	0.22966	0.228682	0.227439	0.228237	0.229429	0.229264	0.229435	0.230608	0.229187	0.229258	0.229598	0.227992	0.229114	0.230604	0.229189	0.230031	0.227265	0.261045	0.263485	0.262337	0.2612	0.262749	0.26119	0.263275	0.263136	0.235842	0.234857	0.252887	0.236063	0.236066	0.229279	0.229726	0.229737	0.228531	0.229752	0	0.261385	0.262527	0.260564	0.260944	0.259122	0.259617	0.257873
Ossetian	Indo_European	0.235135	0.234489	0.233934	0.235836	0.235978	0.235811	0.234686	0.233216	0.234117	0.23574	0.235548	0.235394	0.235939	0.234807	0.234518	0.234951	0.233912	0.235508	0.235734	0.235426	0.235559	0.233363	0.264768	0.266986	0.265812	0.265347	0.266436	0.26478	0.26634	0.266057	0.242685	0.241334	0.257712	0.242624	0.242049	0.235406	0.235617	0.235687	0.234815	0.235989	0.261385	0	0.265989	0.264395	0.264438	0.262542	0.263627	0.259835
Russian	Indo_European	0.235256	0.234333	0.233754	0.235443	0.235709	0.235499	0.234593	0.233553	0.233818	0.235418	0.235299	0.235076	0.235922	0.234645	0.23455	0.235255	0.233859	0.23503	0.23559	0.235026	0.235584	0.233225	0.266055	0.26606	0.267055	0.266191	0.267353	0.266354	0.268948	0.26852	0.245109	0.243272	0.266468	0.244802	0.244655	0.235173	0.235491	0.235574	0.234591	0.235655	0.262527	0.265989	0	0.275881	0.276013	0.273562	0.275324	0.263727
Russian_HGDP	Indo_European	0.238211	0.237603	0.237173	0.239013	0.239336	0.239125	0.237986	0.237024	0.237518	0.239047	0.239043	0.238564	0.23903	0.238057	0.237476	0.238188	0.237187	0.238431	0.238794	0.238367	0.238818	0.236701	0.264513	0.264214	0.265364	0.264742	0.265753	0.264869	0.267464	0.267008	0.249773	0.248024	0.267205	0.249496	0.249343	0.238919	0.239133	0.239442	0.238382	0.239435	0.260564	0.264395	0.275881	0	0.275147	0.273657	0.274701	0.2627
Russian_Krasnoborsky	Indo_European	0.23955	0.23869	0.238087	0.240186	0.240455	0.240403	0.23862	0.238259	0.238646	0.240377	0.239719	0.239623	0.239941	0.238816	0.238685	0.239433	0.237997	0.239535	0.239705	0.239446	0.239625	0.237638	0.264544	0.264001	0.265247	0.264967	0.265778	0.264571	0.266812	0.266795	0.250285	0.248668	0.267227	0.249676	0.249743	0.240123	0.240346	0.240729	0.23927	0.24053	0.260944	0.264438	0.276013	0.275147	0	0.274914	0.275999	0.262893
Russian_Leshukonsky	Indo_European	0.241298	0.240953	0.240602	0.242529	0.242832	0.242549	0.241257	0.240342	0.240859	0.242629	0.242529	0.242061	0.241424	0.241738	0.240235	0.240594	0.240312	0.241944	0.241132	0.242072	0.242224	0.240184	0.263058	0.261855	0.263341	0.262573	0.263865	0.26271	0.265559	0.265351	0.254099	0.252328	0.267388	0.253105	0.253502	0.24254	0.24277	0.243165	0.241867	0.242975	0.259122	0.262542	0.273562	0.273657	0.274914	0	0.277025	0.262123
Russian_Pinezhsky	Indo_European	0.240195	0.239453	0.239015	0.240966	0.241247	0.241233	0.239636	0.238315	0.23904	0.241174	0.240904	0.239995	0.24059	0.240001	0.239213	0.239916	0.239508	0.2408	0.24038	0.240748	0.240657	0.238477	0.263711	0.262893	0.26444	0.26335	0.264831	0.263886	0.266298	0.266455	0.252184	0.250764	0.268282	0.251833	0.252075	0.240902	0.241365	0.24127	0.240712	0.241443	0.259617	0.263627	0.275324	0.274701	0.275999	0.277025	0	0.262583
Tajik	Indo_European	0.238866	0.238409	0.237953	0.239417	0.23982	0.239466	0.238019	0.237345	0.238138	0.239563	0.239311	0.239059	0.239706	0.238434	0.238377	0.238908	0.237775	0.239121	0.239325	0.23946	0.238756	0.237129	0.259854	0.260155	0.260664	0.259823	0.261261	0.259576	0.26351	0.262723	0.24718	0.245859	0.258614	0.247569	0.247213	0.239259	0.239495	0.239648	0.238602	0.240064	0.257873	0.259835	0.263727	0.2627	0.262893	0.262123	0.262583	0
Tajik_Lowland	Indo_European	0.24156	0.241209	0.240883	0.242717	0.243113	0.242961	0.241872	0.240259	0.241443	0.242948	0.242938	0.242629	0.242432	0.241849	0.240832	0.241309	0.24132	0.242426	0.241951	0.242414	0.241833	0.240026	0.259613	0.259846	0.260263	0.259722	0.260676	0.259463	0.262061	0.2618	0.249601	0.248566	0.25869	0.249737	0.249234	0.242821	0.243193	0.243311	0.242439	0.243285	0.257367	0.259713	0.262531	0.261965	0.26207	0.260984	0.261894	0.260227
Tajik_Mountain	Indo_European	0.242016	0.241639	0.241621	0.243375	0.244001	0.243622	0.242391	0.240484	0.24234	0.243683	0.243887	0.243309	0.24254	0.242958	0.241186	0.241938	0.242627	0.243715	0.242507	0.24334	0.242962	0.240888	0.258661	0.25879	0.25921	0.258752	0.259724	0.258588	0.261038	0.260909	0.250146	0.24953	0.257679	0.250264	0.249928	0.243838	0.243913	0.244093	0.243235	0.244344	0.256239	0.258625	0.261365	0.260881	0.260988	0.260231	0.26043	0.258516
Tharu_Nepal	Indo_European	0.267532	0.269466	0.270771	0.273416	0.273238	0.273187	0.271225	0.26842	0.27211	0.27323	0.274124	0.272629	0.267646	0.271136	0.266577	0.266997	0.271264	0.272488	0.26751	0.271561	0.269408	0.268587	0.241817	0.237982	0.240026	0.240428	0.240272	0.240977	0.240132	0.239848	0.268876	0.269747	0.252187	0.26908	0.268195	0.274119	0.274651	0.275352	0.274387	0.275498	0.236343	0.240097	0.240972	0.243015	0.24376	0.244847	0.244801	0.244676
Ukrainian	Indo_European	0.233979	0.233212	0.232396	0.234108	0.234448	0.234273	0.233143	0.232147	0.232427	0.23423	0.233871	0.233881	0.234791	0.233476	0.233213	0.233783	0.232479	0.233718	0.234467	0.233875	0.234331	0.23199	0.266037	0.26636	0.267059	0.266269	0.267351	0.266293	0.268928	0.268741	0.243356	0.241533	0.26569	0.243118	0.243043	0.233939	0.234107	0.234097	0.233286	0.23413	0.262832	0.265951	0.277732	0.2753	0.275646	0.272953	0.274518	0.263484
Japanese_HGDP	Japonic&Koreanic	0.293183	0.297318	0.298482	0.304163	0.304608	0.304871	0.29962	0.295481	0.303643	0.304931	0.306933	0.305652	0.29263	0.301257	0.290589	0.291133	0.302708	0.306045	0.291809	0.302685	0.298398	0.29782	0.238693	0.232067	0.235311	0.237136	0.23557	0.237459	0.234107	0.234565	0.294066	0.296582	0.258621	0.294457	0.292974	0.306194	0.306792	0.307768	0.306371	0.308999	0.230345	0.236535	0.236242	0.240233	0.241362	0.244271	0.24249	0.24061
Japanese_Tokyo1K	Japonic&Koreanic	0.294064	0.298235	0.2992	0.304956	0.306638	0.305461	0.300277	0.296221	0.304363	0.305593	0.307624	0.306476	0.293306	0.302051	0.291474	0.291941	0.303366	0.306731	0.292609	0.303493	0.299115	0.298578	0.239653	0.233086	0.236327	0.23822	0.236648	0.238512	0.235132	0.235541	0.294766	0.297348	0.259557	0.295337	0.293769	0.306952	0.307292	0.308433	0.307023	0.309588	0.231209	0.237629	0.237274	0.241326	0.242327	0.24539	0.24348	0.24165
Korean	Japonic&Koreanic	0.294385	0.298048	0.299561	0.305973	0.30602	0.306255	0.30046	0.295985	0.305226	0.306336	0.307674	0.307476	0.293424	0.302354	0.291348	0.291705	0.30344	0.307332	0.292497	0.30354	0.299547	0.298878	0.238337	0.231885	0.235089	0.236757	0.235684	0.237363	0.233179	0.234085	0.294428	0.29665	0.258355	0.294733	0.293342	0.307715	0.308162	0.309597	0.307656	0.310774	0.229575	0.236191	0.235955	0.240173	0.240978	0.244327	0.242324	0.240562
Baoan_Jishishan	Mongolic	0.287498	0.291286	0.292318	0.29741	0.297561	0.297689	0.293657	0.289686	0.296803	0.297915	0.298428	0.29743	0.286795	0.293815	0.285108	0.285461	0.294742	0.298026	0.285797	0.295007	0.291601	0.290484	0.240616	0.234572	0.237651	0.239069	0.238036	0.239627	0.236541	0.237098	0.287803	0.289432	0.258188	0.288194	0.286779	0.299262	0.300273	0.301422	0.299532	0.301921	0.232628	0.238547	0.238826	0.242233	0.243215	0.246018	0.244329	0.242022
Buryat_Aginsky	Mongolic	0.280997	0.283745	0.285359	0.289721	0.289892	0.290361	0.286339	0.282552	0.28851	0.290033	0.290792	0.289915	0.280578	0.286633	0.278562	0.27917	0.286983	0.290377	0.279781	0.28769	0.284845	0.283702	0.24372	0.237772	0.240901	0.242587	0.24148	0.242882	0.240114	0.241048	0.294798	0.296433	0.262416	0.2948	0.293191	0.291328	0.292471	0.293567	0.291828	0.293895	0.235877	0.241971	0.243077	0.246915	0.247999	0.250877	0.249246	0.244998
Buryat_Bohansky	Mongolic	0.279343	0.282165	0.283433	0.287971	0.288196	0.288518	0.284915	0.281073	0.287077	0.288557	0.288976	0.28831	0.279229	0.284663	0.276784	0.277921	0.285063	0.288386	0.278221	0.285879	0.283164	0.282121	0.244347	0.23769	0.241104	0.242647	0.24128	0.242802	0.240501	0.241203	0.29281	0.294511	0.262528	0.292881	0.291072	0.290191	0.290302	0.291747	0.290046	0.292307	0.235711	0.24201	0.243162	0.246833	0.247506	0.250707	0.248651	0.244841
Buryat_Duldurginsky	Mongolic	0.281997	0.284866	0.286313	0.29044	0.290713	0.291001	0.287284	0.283343	0.289728	0.290827	0.291494	0.29145	0.281511	0.2879	0.279202	0.280178	0.288093	0.291108	0.280681	0.288422	0.285669	0.284623	0.243663	0.237326	0.240987	0.242319	0.241316	0.242697	0.240312	0.241119	0.294774	0.297153	0.262088	0.294382	0.293106	0.29228	0.293469	0.294852	0.292397	0.294805	0.235576	0.242011	0.242668	0.246541	0.247576	0.250223	0.248837	0.245208
Buryat_Ehirit	Mongolic	0.279459	0.282611	0.283469	0.287871	0.288417	0.288496	0.284903	0.281256	0.287092	0.288639	0.289087	0.288364	0.278993	0.285243	0.276836	0.277752	0.28574	0.288622	0.278867	0.286488	0.282935	0.28185	0.24368	0.23811	0.241178	0.242534	0.241265	0.242898	0.240274	0.241075	0.293601	0.294931	0.26198	0.293717	0.292152	0.289908	0.291054	0.291942	0.289994	0.29244	0.236074	0.241891	0.243226	0.246994	0.247822	0.251185	0.249145	0.245289
Buryat_Selenginsky	Mongolic	0.28033	0.283632	0.284687	0.289111	0.289453	0.289711	0.285483	0.281524	0.28798	0.28947	0.29022	0.2897	0.280033	0.286124	0.278204	0.278964	0.286985	0.290074	0.279004	0.28736	0.284229	0.282661	0.243212	0.236953	0.240243	0.241809	0.240757	0.242326	0.239844	0.240024	0.293906	0.296048	0.262043	0.294095	0.292268	0.290753	0.292009	0.292907	0.291156	0.293498	0.234984	0.241257	0.242167	0.245923	0.246807	0.250113	0.24876	0.244456
Buryat_Zakamensky	Mongolic	0.280746	0.283581	0.284414	0.288819	0.289181	0.28975	0.28553	0.281713	0.287714	0.2895	0.289733	0.289047	0.280004	0.285817	0.278414	0.279096	0.286622	0.289941	0.279193	0.287073	0.284133	0.28287	0.243686	0.237515	0.241087	0.242839	0.241004	0.242602	0.240432	0.240817	0.294003	0.296117	0.262151	0.29433	0.292305	0.29066	0.291757	0.293192	0.29061	0.293063	0.235821	0.241873	0.242956	0.246581	0.247371	0.250652	0.24879	0.245093
Kalmyk	Mongolic	0.278376	0.280917	0.282106	0.286136	0.286494	0.286991	0.282472	0.279934	0.285169	0.286887	0.287274	0.286091	0.277923	0.283067	0.275805	0.276436	0.283561	0.286442	0.276556	0.284464	0.281279	0.279873	0.244972	0.23926	0.242147	0.243759	0.24248	0.243828	0.241173	0.242318	0.289018	0.290586	0.26181	0.289308	0.287871	0.287794	0.288887	0.28972	0.288104	0.290306	0.23694	0.243021	0.244536	0.247646	0.248776	0.251318	0.249463	0.245858
Khamnegan	Mongolic	0.282448	0.285755	0.286787	0.291747	0.291903	0.292227	0.288039	0.284952	0.290698	0.292135	0.292609	0.291998	0.28197	0.288511	0.280649	0.281027	0.288833	0.292069	0.281409	0.289889	0.286397	0.285434	0.243153	0.236863	0.240145	0.241907	0.24026	0.242241	0.238978	0.23988	0.296248	0.297916	0.26253	0.296074	0.294225	0.293333	0.294143	0.295399	0.293439	0.296048	0.234744	0.241061	0.242148	0.246042	0.247326	0.250345	0.248454	0.244485
Mogolian_HGDP	Mongolic	0.28951	0.29348	0.294533	0.300263	0.300349	0.300525	0.296292	0.2912	0.29943	0.300518	0.301843	0.301205	0.288657	0.296735	0.286772	0.287223	0.298072	0.301111	0.288212	0.297914	0.293901	0.293242	0.240392	0.233677	0.236977	0.238617	0.237433	0.239024	0.235617	0.236601	0.292292	0.294015	0.258978	0.292593	0.290976	0.301998	0.302676	0.303947	0.302208	0.305283	0.231601	0.238031	0.238109	0.241938	0.242797	0.245969	0.244286	0.241672
Mongol_Minorities	Mongolic	0.280891	0.284062	0.285017	0.289576	0.289752	0.289976	0.285949	0.281891	0.288272	0.290053	0.291052	0.290004	0.280364	0.286747	0.278584	0.279199	0.286945	0.290585	0.279263	0.287782	0.284419	0.283347	0.243991	0.238043	0.241225	0.242475	0.241401	0.243025	0.240591	0.240877	0.290975	0.292845	0.261273	0.291019	0.289481	0.291211	0.292006	0.293189	0.291588	0.293829	0.235842	0.241949	0.242971	0.246465	0.247554	0.250289	0.248698	0.245208
Mongol_Sainnoyon	Mongolic	0.281603	0.284897	0.285996	0.290697	0.290857	0.291134	0.286917	0.28315	0.289612	0.291125	0.29202	0.29123	0.281169	0.28776	0.279203	0.280023	0.288417	0.291281	0.280513	0.288827	0.285662	0.284366	0.243504	0.237233	0.240705	0.242139	0.240983	0.242409	0.239729	0.240349	0.292311	0.293763	0.26156	0.292605	0.290689	0.292314	0.293537	0.294242	0.292519	0.295093	0.235369	0.241718	0.242505	0.246004	0.246845	0.249838	0.24836	0.244467
Mongol_Uuld	Mongolic	0.2797	0.282959	0.283758	0.288335	0.288624	0.288878	0.284485	0.280433	0.287286	0.289002	0.289573	0.288967	0.279587	0.285415	0.27753	0.277925	0.286075	0.28891	0.278407	0.286556	0.283665	0.282635	0.244269	0.238802	0.241612	0.242975	0.241987	0.243394	0.241383	0.24176	0.290765	0.292459	0.261407	0.290819	0.289278	0.290072	0.291032	0.292098	0.289926	0.2927	0.236365	0.242441	0.243423	0.246943	0.247688	0.250664	0.248723	0.24558
Mongol_Zasagt	Mongolic	0.281352	0.284559	0.285744	0.290365	0.290509	0.290732	0.286704	0.282534	0.289462	0.290885	0.291496	0.290375	0.281005	0.28722	0.279094	0.279543	0.287625	0.29118	0.280256	0.288551	0.285335	0.284324	0.243184	0.237352	0.240318	0.24192	0.240456	0.242132	0.239632	0.240515	0.291689	0.293486	0.260933	0.29213	0.290387	0.292055	0.293368	0.294307	0.292106	0.295114	0.235082	0.241119	0.242314	0.245833	0.246594	0.249675	0.248257	0.244367
Tu_HGDP	Mongolic	0.288258	0.291534	0.29295	0.297979	0.298125	0.298233	0.294358	0.289988	0.296956	0.298277	0.299105	0.298014	0.287131	0.294499	0.285672	0.28586	0.294577	0.298538	0.286371	0.2958	0.291668	0.290834	0.239434	0.233431	0.236659	0.238466	0.236999	0.238533	0.235754	0.236335	0.288444	0.290534	0.257694	0.288743	0.287555	0.299921	0.300846	0.302032	0.300393	0.302565	0.231584	0.237503	0.237712	0.241469	0.242304	0.244909	0.243466	0.241531
Yugur_Sunan	Mongolic	0.290439	0.29407	0.295484	0.300728	0.301023	0.301267	0.29641	0.292045	0.300311	0.30148	0.302382	0.301411	0.289713	0.297316	0.287811	0.287883	0.298295	0.301861	0.288597	0.298733	0.29456	0.294044	0.239845	0.233726	0.236675	0.238354	0.237064	0.238666	0.235526	0.236197	0.29039	0.29227	0.258093	0.290906	0.289384	0.302838	0.303793	0.304924	0.30304	0.305635	0.231572	0.237725	0.23783	0.241537	0.242449	0.245259	0.24354	0.24147
Daur_HGDP	Mongolic	0.2888	0.292756	0.293708	0.298898	0.299415	0.29956	0.295291	0.291436	0.298427	0.29976	0.300641	0.299679	0.288291	0.295682	0.286264	0.286769	0.296109	0.299908	0.287371	0.297069	0.293815	0.292628	0.240456	0.233825	0.237171	0.238963	0.237751	0.23929	0.236185	0.23665	0.296227	0.298369	0.260326	0.29649	0.294715	0.300956	0.302123	0.303554	0.30128	0.304194	0.231743	0.238278	0.23842	0.242616	0.243762	0.246687	0.244575	0.241897
Dongxiang_Linxia	Mongolic	0.285295	0.288555	0.290059	0.294702	0.29498	0.295191	0.290666	0.286659	0.29382	0.295165	0.295816	0.294663	0.284965	0.291417	0.282931	0.28374	0.292026	0.295272	0.284154	0.292809	0.288841	0.288408	0.242124	0.236756	0.239594	0.24131	0.239983	0.24083	0.238825	0.239579	0.285997	0.287773	0.259039	0.286761	0.285385	0.296548	0.297232	0.298326	0.29647	0.298633	0.234896	0.240601	0.240869	0.243994	0.245193	0.247242	0.246183	0.243778
Tlingit	Na_Dene	0.257393	0.258359	0.258753	0.261465	0.261927	0.261733	0.259652	0.25673	0.259627	0.261752	0.261914	0.261901	0.257408	0.259495	0.255937	0.256576	0.259922	0.261264	0.257441	0.26058	0.259172	0.257968	0.255186	0.252197	0.25444	0.255084	0.255013	0.255521	0.256255	0.256284	0.283561	0.279384	0.284317	0.288899	0.289704	0.262386	0.262789	0.26362	0.262188	0.263396	0.249589	0.254206	0.261582	0.263149	0.263872	0.264146	0.26467	0.255772
Ket	Others	0.267887	0.269643	0.270661	0.274042	0.27443	0.274721	0.271357	0.268918	0.27278	0.274305	0.274735	0.273912	0.267711	0.271424	0.26622	0.266642	0.272154	0.274059	0.266852	0.272488	0.270317	0.269173	0.249407	0.244251	0.247359	0.248909	0.248238	0.249029	0.248903	0.249497	0.289966	0.289952	0.266681	0.28978	0.289046	0.275668	0.276231	0.276865	0.27528	0.277603	0.241847	0.247828	0.25273	0.255959	0.256795	0.259457	0.258115	0.251628
Kusunda	Others	0.273637	0.276496	0.277494	0.27985	0.279843	0.279762	0.278514	0.275634	0.279122	0.279956	0.279912	0.279529	0.272717	0.2773	0.271637	0.272203	0.277333	0.279037	0.272636	0.278126	0.274932	0.274057	0.238447	0.234354	0.236364	0.237527	0.236885	0.237761	0.235903	0.236515	0.273469	0.274864	0.252039	0.274138	0.272973	0.281101	0.281899	0.282867	0.28121	0.283049	0.232538	0.236762	0.237522	0.240077	0.241159	0.242439	0.241104	0.241539
Nivkh	Others	0.288409	0.291888	0.292903	0.298351	0.29852	0.29858	0.294206	0.290331	0.297316	0.298893	0.300495	0.29931	0.28733	0.295142	0.285894	0.286482	0.296383	0.299947	0.286968	0.296613	0.292574	0.291877	0.239753	0.232824	0.236641	0.238554	0.236876	0.239149	0.235144	0.235998	0.306012	0.311292	0.262875	0.305203	0.30312	0.300124	0.301223	0.302371	0.300439	0.303256	0.231169	0.237903	0.238062	0.24246	0.243898	0.247098	0.245275	0.241897
Dungan	Sinitic	0.286034	0.289384	0.290382	0.295672	0.29569	0.295749	0.291687	0.287455	0.294614	0.29587	0.296621	0.29633	0.285271	0.292212	0.283441	0.283968	0.292848	0.296215	0.284637	0.293871	0.289795	0.288482	0.241546	0.235898	0.239012	0.240381	0.239394	0.240739	0.238171	0.238855	0.286081	0.287749	0.258398	0.286454	0.284954	0.297344	0.298083	0.298889	0.297401	0.299775	0.234318	0.239976	0.240216	0.243409	0.244458	0.246617	0.245455	0.243229
Han_Beijing1K	Sinitic	0.296421	0.30081	0.301688	0.307697	0.308909	0.308333	0.302973	0.298305	0.307379	0.308393	0.309822	0.30885	0.295613	0.304458	0.293849	0.294344	0.305286	0.309133	0.294742	0.305885	0.301103	0.300402	0.239359	0.232797	0.236028	0.237838	0.236435	0.238278	0.23483	0.23531	0.292975	0.295224	0.25875	0.293474	0.29191	0.30985	0.310353	0.311241	0.309812	0.312394	0.23098	0.237238	0.236899	0.240965	0.242058	0.244856	0.243029	0.241193
Han_Chongqing	Sinitic	0.298198	0.302264	0.303635	0.308899	0.309438	0.309475	0.3044	0.300569	0.309451	0.309755	0.311604	0.310599	0.296852	0.305851	0.295387	0.296004	0.30573	0.310594	0.295979	0.307387	0.302023	0.30202	0.238413	0.23207	0.235063	0.236733	0.235445	0.237575	0.233835	0.234487	0.292011	0.294041	0.257868	0.292267	0.290792	0.31134	0.312077	0.312073	0.311653	0.312885	0.230363	0.236216	0.235994	0.239436	0.240682	0.243649	0.24167	0.240206
Han_Fujian	Sinitic	0.297914	0.301801	0.302533	0.308787	0.309194	0.309488	0.303854	0.299995	0.309211	0.309257	0.31171	0.310939	0.296603	0.305895	0.29513	0.295298	0.307678	0.311478	0.295859	0.307643	0.302651	0.301624	0.237761	0.231469	0.234649	0.236386	0.234954	0.236789	0.23326	0.23404	0.290664	0.292672	0.25671	0.29145	0.28998	0.311129	0.311283	0.311165	0.310806	0.313234	0.229654	0.235614	0.235219	0.239219	0.240003	0.242853	0.241781	0.239772
Han_Guangdong	Sinitic	0.298722	0.303548	0.304454	0.309983	0.310147	0.310683	0.304751	0.301266	0.310725	0.310928	0.313048	0.311978	0.298132	0.307543	0.297145	0.297462	0.307989	0.311861	0.297371	0.309611	0.302934	0.302951	0.237683	0.231388	0.234416	0.235877	0.234914	0.236712	0.233284	0.233618	0.289709	0.291626	0.256699	0.290601	0.288644	0.312442	0.311708	0.31176	0.31086	0.312652	0.229209	0.235737	0.235282	0.239047	0.24002	0.242304	0.240899	0.239112
Han_Henan	Sinitic	0.294443	0.298795	0.299744	0.305675	0.305915	0.306133	0.301226	0.296294	0.305344	0.306485	0.307505	0.306851	0.29376	0.302327	0.291957	0.292284	0.303265	0.306898	0.292485	0.303399	0.299152	0.298544	0.239566	0.23286	0.236023	0.237804	0.236448	0.238238	0.234789	0.235458	0.292865	0.295054	0.258792	0.293031	0.291747	0.307656	0.308393	0.309597	0.307827	0.31042	0.230818	0.23731	0.236975	0.240606	0.241926	0.244862	0.243018	0.241387
Han_Hubei	Sinitic	0.297474	0.301583	0.302708	0.308819	0.309195	0.309855	0.304136	0.299409	0.309106	0.309884	0.31173	0.310642	0.29692	0.306422	0.294922	0.295141	0.306772	0.311536	0.295742	0.307849	0.302587	0.301688	0.238509	0.232224	0.235322	0.236968	0.235593	0.237513	0.23405	0.234397	0.293138	0.294848	0.258488	0.293295	0.291977	0.311246	0.311744	0.312298	0.310902	0.313225	0.230313	0.236349	0.236144	0.240137	0.241142	0.243659	0.241867	0.24062
Han_Jiangsu	Sinitic	0.29591	0.300211	0.301224	0.307647	0.308071	0.308386	0.302856	0.298111	0.30715	0.30843	0.310206	0.309159	0.295224	0.304103	0.293588	0.293835	0.305471	0.309324	0.294404	0.305707	0.300953	0.300455	0.238465	0.231575	0.235077	0.236811	0.235326	0.237387	0.23375	0.234262	0.292624	0.294818	0.258056	0.293028	0.291673	0.310049	0.310154	0.310762	0.309787	0.312325	0.230001	0.236261	0.235835	0.239757	0.241142	0.243658	0.242006	0.239929
Han_Shandong	Sinitic	0.294086	0.298149	0.299816	0.305904	0.305893	0.306193	0.300859	0.296429	0.304866	0.306227	0.307547	0.306018	0.293498	0.302083	0.291301	0.291917	0.302861	0.306682	0.29249	0.302966	0.298944	0.298258	0.238482	0.232017	0.235246	0.236963	0.235728	0.237469	0.234185	0.23435	0.292272	0.294742	0.258084	0.293139	0.291461	0.30747	0.308437	0.309685	0.307686	0.310727	0.230291	0.236276	0.236229	0.240137	0.241189	0.244154	0.242753	0.240614
Han_Shanghai	Sinitic	0.297461	0.301641	0.302337	0.308936	0.30931	0.310219	0.304369	0.298791	0.308436	0.309289	0.31122	0.310636	0.296482	0.305779	0.294515	0.29507	0.307083	0.310708	0.295603	0.30693	0.302292	0.301433	0.240221	0.233625	0.237006	0.238976	0.23727	0.239383	0.235551	0.237075	0.294125	0.296708	0.26009	0.294637	0.292941	0.311371	0.311795	0.312406	0.311137	0.31359	0.231513	0.238343	0.237908	0.241746	0.242625	0.246006	0.243634	0.241646
Han_Shanxi	Sinitic	0.29369	0.297495	0.298633	0.304526	0.304903	0.305534	0.299876	0.295477	0.303769	0.305183	0.306371	0.305264	0.2927	0.3009	0.290898	0.291215	0.3026	0.305864	0.291704	0.302494	0.298146	0.297572	0.239317	0.232519	0.236032	0.238172	0.23663	0.238053	0.234868	0.235451	0.292992	0.294966	0.258777	0.293382	0.291872	0.306629	0.307754	0.308939	0.307184	0.310014	0.230937	0.23719	0.237123	0.240954	0.242073	0.244578	0.243268	0.241068
Han_SichuanHO	Sinitic	0.296527	0.301051	0.302061	0.307843	0.307858	0.308079	0.303213	0.298761	0.307487	0.308261	0.310022	0.308825	0.295835	0.304555	0.294331	0.294562	0.305509	0.309437	0.294705	0.306044	0.3006	0.300024	0.237916	0.231231	0.234481	0.236267	0.234894	0.236951	0.233412	0.234078	0.291551	0.293789	0.25736	0.291867	0.290398	0.310234	0.310631	0.310833	0.309661	0.311435	0.22935	0.235828	0.235467	0.239526	0.240433	0.242963	0.241534	0.239463
Han_SouthChina1K	Sinitic	0.298198	0.302833	0.30366	0.309568	0.310603	0.310256	0.304651	0.30047	0.309698	0.310343	0.312322	0.311225	0.297338	0.306793	0.296043	0.296428	0.307754	0.31162	0.296584	0.308356	0.302871	0.302488	0.238818	0.232335	0.235399	0.237206	0.235844	0.237525	0.234214	0.234755	0.291544	0.293737	0.257832	0.291977	0.290585	0.311967	0.311837	0.311998	0.311304	0.313262	0.230395	0.236613	0.236326	0.240262	0.241357	0.243978	0.242355	0.240546
Han_Zhejiang	Sinitic	0.296143	0.301081	0.301217	0.308085	0.308031	0.308564	0.30268	0.298304	0.30765	0.308379	0.310132	0.309055	0.295355	0.304326	0.293396	0.294354	0.305821	0.30905	0.295014	0.305981	0.300647	0.300795	0.23769	0.231186	0.234211	0.235954	0.234777	0.236449	0.232924	0.23374	0.291399	0.293756	0.256967	0.291953	0.290535	0.309862	0.310323	0.311116	0.309676	0.312125	0.229218	0.235431	0.234949	0.23903	0.240159	0.242937	0.24101	0.239176
BoY	Tai_Kadai	0.297118	0.302313	0.302721	0.307722	0.307905	0.307838	0.303461	0.299752	0.308849	0.30827	0.310363	0.30911	0.29663	0.305162	0.295257	0.295618	0.306124	0.309459	0.295565	0.306854	0.300027	0.300506	0.236658	0.230995	0.23378	0.235522	0.234344	0.236041	0.231627	0.232856	0.287479	0.289577	0.255548	0.287832	0.285936	0.310593	0.310973	0.309645	0.309384	0.309921	0.228452	0.235033	0.234501	0.238318	0.238925	0.241491	0.240299	0.238143
CoLao	Tai_Kadai	0.300784	0.306361	0.30668	0.31062	0.310863	0.310958	0.306904	0.304606	0.311602	0.311545	0.31334	0.312338	0.299212	0.308121	0.299478	0.299603	0.30792	0.312009	0.298784	0.309475	0.302772	0.303163	0.238904	0.232748	0.23577	0.23777	0.236046	0.237953	0.234649	0.234834	0.289498	0.291693	0.257181	0.290178	0.288619	0.313538	0.318145	0.312901	0.313496	0.312311	0.230948	0.236956	0.236593	0.240197	0.241032	0.243947	0.242386	0.240565
Dai_HGDP	Tai_Kadai	0.299971	0.305981	0.305582	0.309572	0.310165	0.310353	0.305724	0.304619	0.311664	0.310784	0.312441	0.311735	0.29925	0.308257	0.299303	0.300005	0.30761	0.311729	0.29841	0.309904	0.302376	0.302829	0.237713	0.231581	0.234561	0.235882	0.234761	0.236812	0.233255	0.233717	0.286896	0.288791	0.255449	0.287539	0.286297	0.312789	0.310839	0.310054	0.31022	0.310404	0.229626	0.235538	0.235108	0.238725	0.239799	0.242196	0.240686	0.239329
Dai_Xishuangbanna1k	Tai_Kadai	0.300223	0.305914	0.305906	0.309838	0.310727	0.310574	0.30648	0.304157	0.311483	0.310854	0.312666	0.311471	0.29907	0.30818	0.299398	0.299778	0.307783	0.311712	0.298292	0.309869	0.302449	0.302693	0.237597	0.231417	0.234341	0.236063	0.234691	0.236453	0.23329	0.233634	0.287127	0.289247	0.255717	0.287669	0.286308	0.312588	0.310945	0.31004	0.310473	0.310825	0.229458	0.235513	0.235244	0.239007	0.240159	0.242501	0.240795	0.23933
Dong_Guizhou	Tai_Kadai	0.299296	0.304575	0.304966	0.310067	0.310254	0.310748	0.305684	0.303109	0.311407	0.310923	0.312613	0.311819	0.29862	0.307629	0.298057	0.298224	0.30833	0.312087	0.297489	0.309352	0.302549	0.302537	0.237029	0.230658	0.233865	0.235665	0.23426	0.235953	0.232552	0.233142	0.288776	0.290907	0.255848	0.289174	0.287688	0.31307	0.314436	0.311717	0.312602	0.312328	0.229001	0.235188	0.234803	0.238502	0.239946	0.242339	0.240915	0.239133
Dong_Hunan	Tai_Kadai	0.29954	0.304752	0.304753	0.310246	0.310349	0.310909	0.305848	0.303116	0.310796	0.311015	0.312736	0.311975	0.298469	0.307761	0.297773	0.298465	0.308561	0.312122	0.297654	0.309511	0.302733	0.303359	0.237833	0.231382	0.234529	0.236458	0.235015	0.236772	0.233047	0.23373	0.289245	0.291518	0.256313	0.28946	0.28789	0.312938	0.314023	0.312126	0.312559	0.312351	0.229586	0.235668	0.235115	0.238979	0.239925	0.24265	0.241285	0.239049
Gelao_Longlin	Tai_Kadai	0.299831	0.305427	0.305283	0.309527	0.309779	0.31018	0.306123	0.304155	0.310767	0.310505	0.311795	0.310756	0.298788	0.30739	0.298425	0.299041	0.307027	0.31103	0.297733	0.3093	0.301771	0.302149	0.23756	0.231329	0.234332	0.236094	0.234743	0.236527	0.233105	0.233876	0.28803	0.290173	0.255889	0.28836	0.287275	0.312082	0.312653	0.311071	0.31073	0.310809	0.229241	0.235731	0.235137	0.239012	0.240048	0.242623	0.2409	0.239332
LaChi	Tai_Kadai	0.301083	0.307037	0.30659	0.310051	0.310661	0.310585	0.307071	0.305022	0.311932	0.311601	0.312992	0.311603	0.2996	0.309032	0.300013	0.300318	0.308546	0.312246	0.298876	0.310617	0.303303	0.303213	0.237591	0.231309	0.234407	0.236021	0.234745	0.236341	0.233728	0.233497	0.287982	0.289849	0.256123	0.288084	0.286996	0.313377	0.311702	0.310913	0.310762	0.311202	0.229566	0.235335	0.235384	0.239035	0.239838	0.242834	0.241014	0.239431
Li_Hainan	Tai_Kadai	0.299093	0.305067	0.304696	0.309709	0.310203	0.31001	0.304478	0.302672	0.312048	0.31123	0.313999	0.311624	0.298841	0.308277	0.297565	0.298313	0.308657	0.31225	0.297574	0.309658	0.302578	0.302791	0.23634	0.22985	0.232831	0.234657	0.233575	0.235804	0.231669	0.232301	0.28591	0.287646	0.254561	0.286645	0.285192	0.312487	0.310212	0.309816	0.310198	0.31088	0.227964	0.234066	0.233627	0.237347	0.238649	0.241051	0.239407	0.237826
Maonan_Huanjiang	Tai_Kadai	0.300607	0.30608	0.306159	0.311453	0.311581	0.312083	0.306689	0.303972	0.312583	0.312429	0.314081	0.31264	0.29998	0.309432	0.29949	0.299827	0.309113	0.31348	0.299103	0.310927	0.303746	0.304235	0.237307	0.231043	0.234055	0.23555	0.234553	0.23611	0.23276	0.23325	0.288165	0.290295	0.25584	0.288669	0.287217	0.314342	0.313318	0.311911	0.312535	0.3126	0.229182	0.235316	0.234956	0.238598	0.239919	0.242455	0.24066	0.239022
Mulam_Luocheng	Tai_Kadai	0.299944	0.305549	0.305488	0.310835	0.310794	0.311201	0.306253	0.303292	0.311999	0.311464	0.31365	0.312246	0.299133	0.308505	0.298665	0.298699	0.308735	0.312899	0.297974	0.309997	0.303109	0.303142	0.237202	0.230879	0.233863	0.235543	0.234298	0.236115	0.232735	0.233198	0.288235	0.290356	0.255778	0.288844	0.287368	0.313372	0.312017	0.31108	0.311514	0.312206	0.228754	0.235198	0.234777	0.238505	0.239445	0.242169	0.240412	0.238999
Nung	Tai_Kadai	0.300205	0.305983	0.305948	0.310318	0.310653	0.310765	0.306563	0.303958	0.311582	0.311183	0.313413	0.31235	0.299422	0.308353	0.299092	0.299497	0.30826	0.31242	0.298228	0.309877	0.302833	0.302945	0.237673	0.23131	0.234327	0.235872	0.234634	0.236329	0.233225	0.233667	0.287615	0.28998	0.255516	0.28786	0.286777	0.31292	0.311498	0.310672	0.310855	0.311304	0.229448	0.235341	0.23511	0.238824	0.239841	0.242562	0.241037	0.239142
Tay	Tai_Kadai	0.299573	0.304923	0.305181	0.309697	0.309785	0.310133	0.305711	0.302693	0.310851	0.310397	0.312364	0.311519	0.298404	0.307417	0.297969	0.298321	0.306966	0.311331	0.297394	0.309325	0.302125	0.302086	0.236947	0.230572	0.233642	0.2352	0.234232	0.235592	0.232625	0.232959	0.287469	0.289476	0.255519	0.287952	0.286739	0.31246	0.31091	0.31008	0.310384	0.310965	0.228666	0.234729	0.234486	0.238206	0.239156	0.241775	0.240403	0.238756
Thai	Tai_Kadai	0.296019	0.301489	0.30081	0.303883	0.304107	0.304347	0.301371	0.300492	0.304949	0.304716	0.305953	0.304787	0.29462	0.302501	0.295546	0.295845	0.301225	0.305126	0.293924	0.303965	0.296773	0.296979	0.2378	0.232118	0.234883	0.236458	0.23522	0.236733	0.233721	0.234192	0.282938	0.284675	0.254574	0.28355	0.282111	0.305918	0.304721	0.303524	0.30408	0.304243	0.230364	0.235993	0.235799	0.239152	0.240181	0.242296	0.241125	0.239802
Zhuang_Guangxi	Tai_Kadai	0.29974	0.305242	0.305383	0.31029	0.310687	0.311181	0.305894	0.302788	0.311666	0.311401	0.313456	0.312267	0.299001	0.308105	0.298748	0.298829	0.308517	0.312522	0.298235	0.309887	0.303235	0.303628	0.237605	0.231252	0.234077	0.235824	0.234648	0.236536	0.233235	0.233644	0.288133	0.290237	0.255843	0.288673	0.28713	0.313266	0.312174	0.311058	0.311495	0.312044	0.229284	0.235417	0.235147	0.238885	0.240027	0.242519	0.240677	0.239211
Cong	Tibeto_Burman	0.296362	0.302635	0.30342	0.3043	0.304709	0.304568	0.304093	0.302002	0.305539	0.304955	0.305463	0.304607	0.295833	0.302229	0.29584	0.296433	0.301643	0.304203	0.294499	0.303815	0.296612	0.296427	0.236438	0.230625	0.23358	0.235213	0.233775	0.235466	0.232196	0.233133	0.285659	0.287849	0.254215	0.285897	0.284935	0.306188	0.30681	0.305786	0.305334	0.306019	0.228596	0.23459	0.234566	0.238063	0.239348	0.241697	0.239838	0.238269
Gurung_Nepal	Tibeto_Burman	0.284409	0.288215	0.288986	0.292204	0.292596	0.292814	0.290758	0.286277	0.291865	0.292882	0.293226	0.291831	0.28319	0.288971	0.28192	0.281892	0.289017	0.292067	0.282664	0.289748	0.287074	0.286012	0.237929	0.232276	0.235056	0.236673	0.23525	0.236765	0.233966	0.234762	0.284673	0.286228	0.254758	0.285132	0.283339	0.294294	0.295942	0.297444	0.294673	0.29703	0.230278	0.236086	0.235796	0.239297	0.240246	0.24283	0.241012	0.24067
HaNhi	Tibeto_Burman	0.296068	0.301987	0.302369	0.304136	0.304577	0.304643	0.303229	0.301007	0.304683	0.304937	0.304893	0.304195	0.294536	0.301976	0.294944	0.295267	0.301501	0.304326	0.293653	0.30331	0.297336	0.296612	0.23648	0.230471	0.233432	0.235498	0.233666	0.235551	0.232283	0.233068	0.28727	0.288893	0.254778	0.28801	0.286776	0.306366	0.306237	0.306441	0.305545	0.30643	0.228711	0.234506	0.234485	0.238267	0.239254	0.242099	0.240365	0.238638
Lahu_HGDP	Tibeto_Burman	0.297361	0.304032	0.303998	0.306082	0.30634	0.306561	0.304973	0.302477	0.307032	0.30674	0.307277	0.306494	0.296389	0.303748	0.297177	0.297218	0.303002	0.306438	0.295522	0.306132	0.2987	0.299002	0.236918	0.230945	0.233916	0.235459	0.234647	0.235927	0.232564	0.23305	0.286625	0.289022	0.254899	0.287387	0.285631	0.308152	0.30792	0.307546	0.307243	0.307362	0.229293	0.235211	0.234883	0.238245	0.239322	0.242031	0.24041	0.239054
LoLo	Tibeto_Burman	0.300087	0.306575	0.306092	0.308782	0.309184	0.309698	0.306684	0.305436	0.310572	0.309569	0.311342	0.310296	0.299014	0.307542	0.299398	0.300099	0.305936	0.310006	0.298271	0.308916	0.30083	0.301527	0.237149	0.230845	0.234019	0.235674	0.234293	0.23601	0.232437	0.233205	0.286588	0.289074	0.255226	0.287345	0.285947	0.311088	0.310205	0.308878	0.309394	0.309114	0.229179	0.235148	0.234951	0.238619	0.239284	0.241905	0.240307	0.238701
Naxi_HGDP	Tibeto_Burman	0.292932	0.297758	0.298639	0.302328	0.30287	0.303581	0.299876	0.295747	0.30217	0.303294	0.303305	0.302388	0.291993	0.298938	0.290718	0.290968	0.299416	0.302518	0.290717	0.300322	0.295607	0.294472	0.237814	0.231272	0.234644	0.236589	0.234904	0.236655	0.233249	0.234256	0.290158	0.292196	0.256943	0.290408	0.289101	0.304752	0.305687	0.306483	0.304821	0.307014	0.229835	0.235745	0.235672	0.239454	0.240535	0.243105	0.241574	0.240125
Newar_Nepal	Tibeto_Burman	0.266818	0.268913	0.26936	0.271436	0.27193	0.271926	0.270421	0.268265	0.27089	0.272003	0.272036	0.27143	0.266819	0.269742	0.26582	0.266296	0.269484	0.271351	0.266432	0.270259	0.26855	0.266621	0.242488	0.239335	0.241211	0.241984	0.241733	0.242481	0.241508	0.241732	0.26803	0.268452	0.253079	0.268684	0.267656	0.272697	0.27412	0.273897	0.272864	0.274164	0.237788	0.241619	0.24248	0.244521	0.245363	0.245972	0.24568	0.245875
PhuLa	Tibeto_Burman	0.29863	0.304757	0.304659	0.307734	0.307918	0.308171	0.305542	0.303155	0.308837	0.308553	0.309411	0.30807	0.297197	0.305559	0.297533	0.298158	0.304509	0.308468	0.296547	0.307216	0.299763	0.30002	0.236814	0.230606	0.233654	0.235404	0.234063	0.235756	0.232425	0.232892	0.287279	0.289313	0.254631	0.287269	0.285951	0.310294	0.310924	0.308833	0.308974	0.308845	0.228785	0.234875	0.234588	0.238296	0.239437	0.242106	0.240453	0.238874
Qiang_Danba	Tibeto_Burman	0.291994	0.296398	0.297505	0.302281	0.30267	0.3032	0.29946	0.294021	0.301996	0.30305	0.303632	0.302448	0.291146	0.298527	0.289388	0.289549	0.299198	0.302565	0.290155	0.299796	0.295828	0.294443	0.237504	0.231045	0.234311	0.236254	0.235007	0.236221	0.232794	0.233583	0.291301	0.293182	0.257097	0.291639	0.290708	0.304694	0.306396	0.30752	0.304818	0.307402	0.229398	0.235441	0.235321	0.239323	0.240266	0.243238	0.241362	0.239466
Qiang_Daofu	Tibeto_Burman	0.29117	0.295378	0.296717	0.301202	0.301431	0.301754	0.298225	0.29365	0.300553	0.301821	0.302105	0.301449	0.290356	0.297436	0.28842	0.289093	0.298176	0.301752	0.289137	0.298788	0.295056	0.293466	0.238408	0.232103	0.235196	0.237212	0.235764	0.237473	0.233981	0.234568	0.291305	0.293482	0.257638	0.291751	0.290288	0.303613	0.305215	0.30609	0.304173	0.306333	0.230178	0.235957	0.23613	0.239886	0.241118	0.24364	0.242381	0.240295
Rai_Nepal	Tibeto_Burman	0.28703	0.291479	0.292052	0.295724	0.29592	0.296149	0.294003	0.288673	0.295246	0.296078	0.29617	0.295038	0.285805	0.292418	0.284459	0.284873	0.292282	0.295363	0.285167	0.293474	0.290086	0.288401	0.237258	0.231532	0.234579	0.235641	0.234844	0.236485	0.233362	0.233712	0.287111	0.288807	0.2555	0.287428	0.286264	0.29796	0.299196	0.30039	0.298391	0.300763	0.229952	0.23514	0.235608	0.239111	0.240423	0.242977	0.241893	0.239717
Sherpa_Nepal	Tibeto_Burman	0.286595	0.291349	0.292008	0.295813	0.296239	0.296747	0.294206	0.289522	0.295143	0.29622	0.296853	0.295526	0.286016	0.292798	0.284478	0.284992	0.292666	0.29594	0.285394	0.293349	0.290209	0.289128	0.237771	0.231422	0.23477	0.236142	0.235141	0.236993	0.233941	0.234062	0.2884	0.290058	0.256196	0.288105	0.287231	0.298267	0.29981	0.30144	0.299059	0.301015	0.229902	0.235909	0.235795	0.239617	0.239966	0.242707	0.241047	0.240302
Sila	Tibeto_Burman	0.295322	0.301431	0.301995	0.30378	0.304261	0.30444	0.302873	0.300091	0.303958	0.305083	0.304691	0.303544	0.293878	0.301069	0.294022	0.294723	0.300887	0.304162	0.29335	0.30263	0.296747	0.295897	0.236624	0.229919	0.233179	0.23528	0.233504	0.235111	0.232189	0.232458	0.288127	0.290374	0.25522	0.288275	0.286812	0.305937	0.306257	0.306458	0.305635	0.306462	0.228371	0.234281	0.23417	0.238126	0.239045	0.241658	0.240354	0.238249
Tamang_Nepal	Tibeto_Burman	0.280117	0.283495	0.284758	0.28765	0.287924	0.288427	0.286165	0.282165	0.287073	0.288244	0.288219	0.28722	0.27954	0.284592	0.278205	0.278749	0.284957	0.287422	0.278897	0.285663	0.28245	0.281255	0.238726	0.233511	0.236255	0.237983	0.236539	0.237541	0.235495	0.23589	0.280883	0.282393	0.254363	0.280653	0.2802	0.289469	0.291093	0.291936	0.290188	0.291855	0.232118	0.23678	0.237354	0.240581	0.241774	0.243775	0.242282	0.241712
Tibetan_Chamdo	Tibeto_Burman	0.287791	0.292145	0.293223	0.297361	0.297605	0.297861	0.29546	0.289709	0.296323	0.298022	0.2978	0.297054	0.286814	0.293395	0.285235	0.28549	0.293873	0.297513	0.285991	0.294676	0.29107	0.289986	0.237526	0.23102	0.234291	0.23598	0.234878	0.236386	0.232916	0.233923	0.289908	0.291948	0.256676	0.290228	0.288642	0.299562	0.30135	0.303093	0.300681	0.302925	0.22933	0.235368	0.235344	0.239147	0.240363	0.243043	0.241455	0.239501
Tibetan_Gangcha	Tibeto_Burman	0.286393	0.289861	0.291211	0.295643	0.29579	0.295976	0.292616	0.287868	0.294638	0.296168	0.296172	0.295386	0.285217	0.292061	0.283732	0.283941	0.292406	0.295583	0.28458	0.293366	0.28984	0.288671	0.239819	0.233624	0.236802	0.238594	0.237113	0.238724	0.235619	0.236264	0.288896	0.29105	0.257769	0.28944	0.288142	0.297383	0.299071	0.300304	0.298033	0.300578	0.231826	0.23762	0.237811	0.241565	0.242232	0.245282	0.243365	0.241585
Tibetan_Gannan	Tibeto_Burman	0.287803	0.292005	0.292981	0.298195	0.298089	0.298009	0.293775	0.289121	0.297275	0.298404	0.2988	0.298178	0.287441	0.294281	0.285479	0.28596	0.295199	0.298478	0.286364	0.295498	0.291719	0.290557	0.240642	0.235021	0.23799	0.239543	0.23835	0.239716	0.237456	0.237768	0.288079	0.289838	0.25833	0.288581	0.287781	0.299795	0.30081	0.301596	0.30016	0.302545	0.23286	0.238859	0.238866	0.242714	0.243149	0.246235	0.244434	0.242092
Tibetan_Lhasa	Tibeto_Burman	0.287209	0.291402	0.292531	0.296368	0.296678	0.297088	0.294416	0.288962	0.295808	0.29701	0.297164	0.295923	0.286142	0.292699	0.284346	0.285024	0.29287	0.296593	0.285166	0.293855	0.290299	0.289319	0.238434	0.232144	0.235461	0.237087	0.235721	0.237131	0.234009	0.234943	0.289116	0.291095	0.257103	0.289763	0.288356	0.298427	0.30002	0.30179	0.299184	0.301384	0.230511	0.236122	0.2363	0.240183	0.240966	0.243755	0.242141	0.240596
Tibetan_Nagqu	Tibeto_Burman	0.287659	0.291615	0.293091	0.297064	0.297331	0.297668	0.294537	0.289307	0.296399	0.297599	0.297689	0.296755	0.286668	0.29339	0.28486	0.285196	0.294035	0.296966	0.285865	0.294535	0.291436	0.289687	0.237898	0.231659	0.235144	0.236767	0.235347	0.237118	0.233742	0.234403	0.289615	0.291619	0.256732	0.290324	0.288579	0.298981	0.300829	0.302153	0.299903	0.3023	0.230021	0.235848	0.235924	0.239843	0.240492	0.243808	0.241956	0.240241
Tibetan_Shannan	Tibeto_Burman	0.28676	0.29083	0.291929	0.295663	0.29567	0.296044	0.293245	0.288684	0.294543	0.296166	0.296229	0.295419	0.285505	0.292202	0.283978	0.284514	0.292244	0.295653	0.285055	0.29306	0.290115	0.288801	0.238233	0.232021	0.235138	0.237038	0.235474	0.236995	0.234047	0.234761	0.288117	0.289927	0.256611	0.288424	0.287384	0.297819	0.299349	0.300915	0.298005	0.300753	0.230245	0.235971	0.236301	0.239982	0.240883	0.243856	0.241732	0.240581
Tibetan_Shigatse	Tibeto_Burman	0.287047	0.290958	0.292062	0.295916	0.296234	0.296812	0.293618	0.289044	0.294893	0.296572	0.296566	0.295765	0.286029	0.292398	0.284522	0.284658	0.292537	0.296125	0.285187	0.2935	0.290458	0.288804	0.237866	0.231796	0.234839	0.236671	0.235316	0.236825	0.233941	0.234348	0.288857	0.29058	0.256539	0.289254	0.287964	0.297786	0.300053	0.301161	0.29906	0.301106	0.229971	0.235618	0.236011	0.239769	0.240561	0.243783	0.24191	0.240434
Tibetan_Xinlong	Tibeto_Burman	0.292139	0.297033	0.298285	0.302819	0.303013	0.303473	0.299036	0.29428	0.302633	0.303399	0.304278	0.303314	0.291735	0.299615	0.289785	0.290365	0.29986	0.303778	0.290899	0.300808	0.296246	0.295546	0.237972	0.231456	0.234625	0.236659	0.234985	0.236801	0.23339	0.233863	0.290345	0.292585	0.257236	0.291171	0.28968	0.304916	0.306304	0.307147	0.305408	0.30739	0.229766	0.235765	0.235608	0.239627	0.240659	0.243139	0.241546	0.239996
Tibetan_Xunhua	Tibeto_Burman	0.287908	0.291449	0.292011	0.296934	0.297146	0.297502	0.293406	0.288551	0.296323	0.297505	0.297471	0.29678	0.286752	0.293477	0.284677	0.285364	0.294606	0.297728	0.286038	0.295061	0.290832	0.29004	0.240341	0.234234	0.237131	0.238563	0.237919	0.239066	0.236097	0.236503	0.288799	0.290556	0.258031	0.28918	0.288149	0.299142	0.300218	0.301473	0.299289	0.301749	0.231755	0.238023	0.238161	0.241791	0.242166	0.245159	0.243785	0.241267
Tibetan_Yajiang	Tibeto_Burman	0.289086	0.293176	0.294905	0.298954	0.299399	0.299591	0.296148	0.290988	0.29863	0.299887	0.300107	0.29903	0.28889	0.295428	0.286356	0.287036	0.296567	0.299529	0.287407	0.296998	0.292995	0.291796	0.238293	0.231611	0.235006	0.236926	0.235624	0.237294	0.233836	0.234651	0.289892	0.292066	0.257367	0.290111	0.288755	0.301018	0.302874	0.303971	0.301909	0.304109	0.230194	0.23598	0.236201	0.239968	0.240657	0.243439	0.241974	0.240188
TibetanHO_Yunnan	Tibeto_Burman	0.290315	0.295295	0.296475	0.300582	0.30054	0.300854	0.297553	0.292862	0.299895	0.300717	0.300967	0.300123	0.289932	0.296916	0.28812	0.288795	0.297071	0.300486	0.288731	0.297927	0.29364	0.292415	0.237743	0.231369	0.234538	0.236787	0.235504	0.236658	0.233945	0.233935	0.29023	0.29302	0.256887	0.290574	0.289323	0.302581	0.304215	0.305635	0.303145	0.305415	0.229563	0.235526	0.235668	0.239588	0.240803	0.243835	0.241545	0.239865
Tujia_HGDP	Tibeto_Burman	0.296842	0.301318	0.302476	0.308034	0.308177	0.308469	0.303404	0.299579	0.307962	0.308895	0.310526	0.309587	0.296092	0.305198	0.294463	0.29509	0.305777	0.309893	0.295152	0.306539	0.301114	0.301094	0.238023	0.231483	0.234615	0.236529	0.235267	0.236861	0.233056	0.23399	0.290927	0.293471	0.257076	0.291668	0.289941	0.310351	0.311562	0.311526	0.310677	0.311905	0.229594	0.235806	0.235623	0.239538	0.240634	0.243291	0.241556	0.240216
Vietnam_Lahu	Tibeto_Burman	0.296975	0.302905	0.303175	0.30522	0.305493	0.305719	0.304341	0.302191	0.305762	0.305846	0.306147	0.304872	0.295989	0.302917	0.296078	0.296571	0.302368	0.305066	0.294807	0.304587	0.297832	0.297329	0.237252	0.231028	0.234176	0.236151	0.234432	0.235931	0.233177	0.233687	0.287222	0.288977	0.25532	0.287327	0.285949	0.307097	0.307085	0.306825	0.306083	0.306805	0.229283	0.235133	0.23531	0.238841	0.239977	0.242689	0.241184	0.239282
Yi_HGDP	Tibeto_Burman	0.29331	0.298041	0.299195	0.30331	0.303473	0.303466	0.300706	0.296312	0.30308	0.303884	0.304554	0.303008	0.292162	0.299841	0.290976	0.291611	0.300744	0.304	0.291671	0.301167	0.296619	0.296143	0.237886	0.231344	0.23475	0.236756	0.235223	0.236708	0.233462	0.234131	0.290735	0.292351	0.257229	0.291333	0.289795	0.305563	0.306898	0.307354	0.305608	0.307385	0.23003	0.235973	0.235626	0.239587	0.240574	0.243193	0.241577	0.24001
Even	Tungusic	0.269289	0.271498	0.272175	0.275605	0.275892	0.27612	0.273308	0.270344	0.274524	0.276085	0.276526	0.276022	0.268995	0.273184	0.267308	0.268088	0.272548	0.276428	0.268542	0.274413	0.272029	0.270388	0.249879	0.244845	0.247824	0.248787	0.248054	0.248933	0.248052	0.248224	0.28737	0.288435	0.265522	0.286605	0.285525	0.277004	0.277878	0.278536	0.276776	0.278933	0.242572	0.248011	0.252591	0.255366	0.256155	0.258378	0.257351	0.250137
Evenk_FarEast	Tungusic	0.289175	0.291333	0.293767	0.298398	0.298823	0.299284	0.293817	0.290381	0.297477	0.29933	0.300965	0.299772	0.288014	0.295048	0.285273	0.286465	0.295934	0.301129	0.287467	0.297012	0.293213	0.292399	0.24042	0.233169	0.236784	0.238908	0.23732	0.239346	0.235163	0.236557	0.305907	0.30943	0.263357	0.305925	0.303166	0.300416	0.301953	0.302702	0.300718	0.303645	0.230872	0.238229	0.238452	0.243306	0.244716	0.247953	0.246283	0.242791
Evenk_Transbaikal	Tungusic	0.282185	0.2857	0.286683	0.291493	0.291695	0.292147	0.288775	0.284117	0.29018	0.29209	0.292895	0.291812	0.281847	0.288027	0.280463	0.280991	0.2888	0.291772	0.281329	0.289241	0.2859	0.284949	0.242497	0.235849	0.239579	0.241287	0.239793	0.242055	0.239008	0.239866	0.305987	0.308443	0.265039	0.304755	0.303	0.293619	0.294651	0.295547	0.293475	0.295964	0.233896	0.240353	0.242253	0.247003	0.248049	0.252127	0.249842	0.244685
Hezhen_HGDP	Tungusic	0.289812	0.293337	0.294491	0.299729	0.300094	0.300465	0.295573	0.29128	0.298913	0.300597	0.301418	0.30009	0.288456	0.296269	0.287268	0.287258	0.296965	0.300696	0.287716	0.297406	0.293544	0.292743	0.240218	0.232983	0.236617	0.238251	0.236923	0.238853	0.235711	0.236334	0.29809	0.300901	0.260577	0.297933	0.296178	0.301971	0.30276	0.304085	0.301968	0.30482	0.231271	0.237592	0.237875	0.242043	0.243141	0.246451	0.244639	0.241649
Nanai	Tungusic	0.288996	0.29307	0.293872	0.29937	0.299477	0.299758	0.295436	0.290412	0.298352	0.299801	0.301076	0.300118	0.288406	0.296064	0.286732	0.286993	0.297241	0.300312	0.287446	0.297313	0.293514	0.292476	0.239991	0.232666	0.236499	0.238641	0.236983	0.239087	0.235069	0.23595	0.304952	0.308561	0.262816	0.304456	0.30252	0.300978	0.302258	0.303756	0.301523	0.304358	0.230883	0.237725	0.237994	0.242779	0.244057	0.247642	0.245374	0.24176
Negidal	Tungusic	0.28883	0.292203	0.293703	0.299173	0.299134	0.299204	0.294882	0.291169	0.298178	0.299499	0.300998	0.299875	0.288165	0.295735	0.286365	0.28698	0.296737	0.300387	0.28761	0.297487	0.293526	0.293216	0.240716	0.233454	0.236855	0.238582	0.237218	0.239457	0.235889	0.236725	0.30701	0.311213	0.263719	0.306192	0.303745	0.300548	0.301968	0.303398	0.300897	0.304184	0.230751	0.238321	0.238512	0.243232	0.244904	0.248617	0.246412	0.241918
Oroqen_HGDP	Tungusic	0.288833	0.292108	0.29343	0.299019	0.299093	0.299441	0.294597	0.290609	0.29825	0.299403	0.300459	0.299587	0.287941	0.295572	0.286272	0.286371	0.296067	0.299979	0.287342	0.296956	0.292674	0.292284	0.241005	0.234366	0.237823	0.239636	0.238277	0.239915	0.236663	0.237128	0.300871	0.303515	0.262407	0.300558	0.29829	0.300832	0.301891	0.303021	0.301087	0.303825	0.232374	0.238767	0.23931	0.243897	0.244832	0.248345	0.246282	0.242943
Ulchi	Tungusic	0.287925	0.291872	0.292679	0.297627	0.297937	0.298122	0.293688	0.289572	0.296794	0.298334	0.299586	0.298703	0.286833	0.294483	0.285261	0.285858	0.295719	0.299185	0.286334	0.295813	0.292069	0.291197	0.240173	0.233131	0.23668	0.238751	0.236886	0.239163	0.235401	0.235952	0.30556	0.310258	0.26271	0.304969	0.302612	0.299576	0.300637	0.30183	0.299887	0.302559	0.230889	0.237765	0.238211	0.24282	0.243975	0.247593	0.245552	0.241771
Xibo_HGDP	Tungusic	0.289507	0.293381	0.294153	0.29991	0.300149	0.300721	0.295367	0.290927	0.299409	0.300543	0.301484	0.30084	0.288888	0.2962	0.286728	0.287229	0.297694	0.301371	0.28795	0.297914	0.293971	0.293096	0.239631	0.233109	0.236584	0.238318	0.236655	0.238406	0.235645	0.236027	0.293944	0.295833	0.259157	0.293659	0.292369	0.301645	0.30271	0.304069	0.302589	0.304867	0.231041	0.237568	0.237712	0.241793	0.24286	0.245321	0.244215	0.241202
Altaian	Turkic	0.273032	0.27569	0.276204	0.280145	0.280452	0.280422	0.27715	0.273881	0.278964	0.280607	0.281032	0.280247	0.272579	0.277345	0.270945	0.271419	0.27742	0.280656	0.271987	0.27858	0.276136	0.274899	0.247513	0.242593	0.245094	0.246339	0.245561	0.246582	0.245493	0.245856	0.286753	0.287658	0.262785	0.286766	0.285599	0.281501	0.282501	0.283423	0.281623	0.283789	0.24011	0.245638	0.248063	0.251021	0.251999	0.254044	0.252731	0.248754
Altaian_Chelkans	Turkic	0.265125	0.267229	0.267447	0.270774	0.271184	0.271528	0.26854	0.266201	0.269407	0.271272	0.271511	0.270918	0.265364	0.268861	0.263677	0.264026	0.268355	0.271165	0.26441	0.270234	0.268013	0.266751	0.250169	0.246307	0.249152	0.249716	0.249784	0.249703	0.250061	0.250765	0.280094	0.280429	0.264757	0.280875	0.279755	0.271981	0.272651	0.2735	0.272192	0.273641	0.244319	0.249387	0.25337	0.255914	0.256619	0.258715	0.257245	0.252314
Bashkir_central	Turkic	0.249385	0.249856	0.249725	0.252067	0.252584	0.25231	0.250122	0.249032	0.251121	0.252713	0.252488	0.252188	0.249777	0.250745	0.248261	0.248859	0.250272	0.252026	0.249344	0.251386	0.250601	0.248837	0.257863	0.256112	0.257752	0.257815	0.2581	0.258034	0.259177	0.259063	0.261879	0.260988	0.264287	0.261966	0.261284	0.252668	0.253237	0.253726	0.25231	0.253716	0.252977	0.25725	0.264299	0.264743	0.265193	0.26504	0.265264	0.25745
Bashkir_north	Turkic	0.247647	0.247759	0.24777	0.250043	0.250272	0.250075	0.248119	0.246504	0.248415	0.250063	0.249983	0.249932	0.248082	0.248715	0.246639	0.247147	0.248122	0.249844	0.247611	0.249319	0.249014	0.246857	0.260167	0.258655	0.26021	0.259842	0.260663	0.260287	0.261996	0.261657	0.260348	0.259344	0.265401	0.260176	0.259659	0.250241	0.250646	0.250971	0.249985	0.251094	0.255748	0.259636	0.267424	0.267635	0.267986	0.267369	0.267722	0.259364
Bashkir_south	Turkic	0.25588	0.256813	0.256885	0.259944	0.260199	0.260257	0.257726	0.255964	0.258385	0.260107	0.260135	0.259737	0.255981	0.258131	0.254627	0.255268	0.258139	0.259834	0.255478	0.258684	0.257523	0.255909	0.255567	0.253004	0.254788	0.255377	0.255464	0.255408	0.256087	0.256195	0.269159	0.268557	0.264107	0.269328	0.268477	0.260401	0.26106	0.261588	0.260019	0.261923	0.250163	0.254873	0.260312	0.261449	0.261958	0.262979	0.262067	0.255844
Chuvash	Turkic	0.245876	0.245798	0.245934	0.24807	0.248372	0.248137	0.246188	0.244881	0.24666	0.248116	0.248379	0.24823	0.24619	0.246865	0.244669	0.245642	0.245912	0.247904	0.245886	0.247451	0.247089	0.245195	0.260338	0.258813	0.260491	0.260339	0.260571	0.260507	0.262054	0.262227	0.259464	0.25851	0.266094	0.259107	0.258612	0.248247	0.248369	0.249023	0.247805	0.249451	0.255815	0.25991	0.268677	0.268793	0.269461	0.26876	0.268985	0.259531
Dolgan	Turkic	0.277503	0.280417	0.281813	0.285994	0.286323	0.286619	0.2831	0.279753	0.285235	0.286883	0.287757	0.287053	0.27743	0.28291	0.275477	0.276319	0.283245	0.287086	0.276748	0.284154	0.281674	0.280425	0.244152	0.237839	0.2409	0.242738	0.241379	0.243169	0.240476	0.24135	0.296528	0.297875	0.263161	0.295666	0.293431	0.287814	0.289242	0.290022	0.288401	0.290086	0.235436	0.241894	0.243873	0.248151	0.248917	0.252839	0.250461	0.245718
Karakalpak	Turkic	0.262332	0.26374	0.264347	0.267745	0.268012	0.267874	0.265127	0.262202	0.266338	0.268189	0.268223	0.267688	0.2623	0.265354	0.260541	0.261014	0.265434	0.268065	0.261664	0.26638	0.264722	0.263179	0.2512	0.247919	0.249909	0.250316	0.250332	0.250629	0.25035	0.250344	0.272961	0.273363	0.261315	0.272932	0.272081	0.268706	0.269369	0.270214	0.268484	0.270427	0.245192	0.25017	0.253009	0.254632	0.255632	0.256297	0.255623	0.25128
Kazakh	Turkic	0.267168	0.269036	0.269815	0.273278	0.273767	0.273595	0.270419	0.267398	0.272265	0.273696	0.273902	0.273578	0.267074	0.271024	0.265568	0.266153	0.271061	0.273479	0.266419	0.272055	0.269748	0.268449	0.249616	0.245823	0.248016	0.248938	0.248415	0.249273	0.248226	0.248488	0.277764	0.278528	0.261455	0.277933	0.276585	0.274514	0.27544	0.276186	0.274532	0.276589	0.243359	0.248409	0.251054	0.253085	0.253566	0.255213	0.254223	0.249943
Kazakh_Aksay	Turkic	0.272206	0.274733	0.275442	0.279261	0.279654	0.279887	0.276514	0.273248	0.278452	0.27988	0.280366	0.279926	0.271905	0.277151	0.270193	0.270962	0.277369	0.28023	0.271801	0.278194	0.275794	0.273894	0.246283	0.241725	0.244215	0.245483	0.244755	0.245715	0.244262	0.244437	0.282342	0.283167	0.260689	0.282435	0.281141	0.280656	0.281816	0.282751	0.28056	0.283056	0.239622	0.244907	0.246781	0.249391	0.250538	0.252061	0.251067	0.247218
Khakass_Kachins	Turkic	0.273136	0.275481	0.276046	0.280444	0.280811	0.280837	0.277575	0.274224	0.27896	0.280868	0.281239	0.280759	0.272994	0.277671	0.271063	0.272104	0.27808	0.280915	0.272167	0.278687	0.276443	0.275465	0.247071	0.242048	0.244908	0.246316	0.245384	0.246071	0.245065	0.245709	0.287511	0.289058	0.263313	0.287768	0.28595	0.28159	0.282904	0.283515	0.281782	0.284431	0.239938	0.245784	0.24806	0.251371	0.252031	0.254251	0.252773	0.248851
Khakass_Koibals	Turkic	0.272291	0.275185	0.275286	0.279321	0.27961	0.279391	0.276591	0.27401	0.277946	0.279867	0.280324	0.279579	0.271863	0.276372	0.270264	0.270982	0.276248	0.279976	0.271409	0.278205	0.274817	0.274386	0.247793	0.243048	0.245596	0.246682	0.246025	0.24697	0.24637	0.246461	0.287381	0.287828	0.263591	0.28821	0.286622	0.280575	0.281413	0.282558	0.28097	0.282526	0.240264	0.246236	0.249014	0.25194	0.252254	0.254928	0.253869	0.248975
Khakass_Sagai	Turkic	0.26684	0.269084	0.269573	0.273264	0.273406	0.273355	0.270092	0.267848	0.271734	0.273367	0.273786	0.273624	0.266802	0.270832	0.265116	0.265659	0.271145	0.273246	0.266341	0.271665	0.270019	0.268247	0.249323	0.244936	0.247922	0.248804	0.248355	0.249021	0.248853	0.249455	0.282211	0.282755	0.264228	0.282506	0.281428	0.27426	0.275046	0.276011	0.274133	0.27607	0.24264	0.248223	0.251975	0.254442	0.255484	0.257521	0.25597	0.250809
Kirghiz	Turkic	0.269132	0.271513	0.271483	0.275516	0.275778	0.275947	0.273125	0.270002	0.274318	0.276105	0.276233	0.276028	0.268746	0.273334	0.267063	0.267729	0.272824	0.275841	0.268691	0.273941	0.272219	0.270856	0.248643	0.244306	0.246737	0.247844	0.247206	0.247844	0.246761	0.24703	0.279362	0.279935	0.260933	0.279285	0.277551	0.276806	0.277837	0.278656	0.276958	0.278995	0.241986	0.247163	0.249224	0.251343	0.252183	0.253811	0.253141	0.249294
Kumyk	Turkic	0.233925	0.23318	0.232637	0.234676	0.234695	0.234305	0.233297	0.232409	0.233109	0.234085	0.233912	0.233976	0.234916	0.233843	0.233676	0.233969	0.232835	0.234086	0.234419	0.233988	0.233989	0.232186	0.263606	0.265593	0.264993	0.263935	0.265829	0.263922	0.26722	0.266633	0.242064	0.240994	0.257786	0.241984	0.241531	0.234268	0.234413	0.234368	0.233705	0.23499	0.261517	0.264253	0.266335	0.264697	0.264955	0.262924	0.264113	0.260186
Kyrgyz_Urumqi	Turkic	0.270717	0.272532	0.273514	0.277128	0.277589	0.277566	0.274526	0.271259	0.276273	0.277821	0.278207	0.277658	0.270674	0.274663	0.268462	0.269224	0.274875	0.277675	0.269664	0.275872	0.273355	0.271988	0.24799	0.243793	0.246097	0.247061	0.246567	0.24753	0.246139	0.246514	0.28075	0.281653	0.261373	0.28094	0.279479	0.278314	0.279525	0.280266	0.278805	0.280684	0.24135	0.24665	0.248715	0.251173	0.252105	0.253578	0.252523	0.248825
Salar_Xunhua	Turkic	0.283139	0.286807	0.287261	0.292287	0.292157	0.292279	0.288976	0.284514	0.291769	0.292738	0.293346	0.291909	0.282898	0.289008	0.280675	0.281193	0.28906	0.292635	0.281564	0.290216	0.286349	0.285363	0.242348	0.236781	0.239886	0.241043	0.24026	0.241098	0.238893	0.239543	0.284224	0.2857	0.258209	0.284755	0.283249	0.29405	0.294765	0.295624	0.293963	0.29605	0.235011	0.240556	0.241008	0.244167	0.245028	0.247102	0.245938	0.243839
Tatar_Kazan	Turkic	0.244853	0.244816	0.24444	0.246585	0.246999	0.246748	0.245351	0.243553	0.244961	0.246814	0.246669	0.246282	0.245272	0.245361	0.243966	0.244496	0.244378	0.246372	0.244907	0.246031	0.245753	0.243251	0.261198	0.260591	0.261865	0.261284	0.262222	0.261524	0.263158	0.263312	0.256213	0.255213	0.265187	0.256214	0.255796	0.24693	0.24708	0.247467	0.246338	0.247592	0.257193	0.261318	0.269181	0.268657	0.269326	0.268402	0.268789	0.260234
Tatar_Mishar	Turkic	0.24228	0.2422	0.241729	0.243929	0.244197	0.243901	0.242455	0.241454	0.242246	0.244052	0.244032	0.243581	0.242867	0.24258	0.241499	0.24201	0.241941	0.243431	0.242442	0.243137	0.243109	0.240776	0.262878	0.26216	0.263431	0.263104	0.263699	0.262973	0.265312	0.26488	0.252995	0.251991	0.265391	0.252701	0.252406	0.243976	0.244756	0.244629	0.243532	0.244516	0.25868	0.262677	0.271752	0.270633	0.27068	0.269541	0.270662	0.261376
Tatar_Siberian	Turkic	0.258462	0.259332	0.259836	0.262627	0.263044	0.262963	0.26054	0.258856	0.26134	0.262991	0.263059	0.262649	0.25841	0.260825	0.257016	0.257438	0.260503	0.262654	0.257907	0.261571	0.260305	0.258794	0.254119	0.250867	0.253035	0.25373	0.253528	0.253633	0.254305	0.254351	0.272035	0.271701	0.263862	0.272029	0.271263	0.26351	0.264169	0.264848	0.263501	0.265167	0.248251	0.253087	0.258071	0.259529	0.26002	0.260824	0.260557	0.254248
Tatar_Zabolotniye	Turkic	0.259186	0.260767	0.261357	0.264217	0.264429	0.264477	0.261976	0.259566	0.262995	0.264396	0.2648	0.264267	0.25963	0.262388	0.25801	0.258598	0.262687	0.264421	0.258836	0.26294	0.261297	0.260387	0.252841	0.249007	0.251761	0.252219	0.251875	0.252452	0.253071	0.253552	0.277036	0.276596	0.265074	0.276449	0.27585	0.265123	0.265286	0.266323	0.264353	0.266301	0.246476	0.251827	0.257316	0.259601	0.260724	0.262535	0.261298	0.254129
Tofalar	Turkic	0.277137	0.280256	0.281234	0.28543	0.285605	0.285625	0.282147	0.279323	0.284279	0.285744	0.286464	0.286029	0.276661	0.282687	0.27506	0.27583	0.283099	0.285829	0.276098	0.283694	0.280759	0.279059	0.245269	0.239415	0.242721	0.244435	0.243255	0.244807	0.242506	0.243057	0.2966	0.297807	0.264897	0.296438	0.294946	0.286975	0.287997	0.289126	0.287346	0.289464	0.237205	0.243526	0.246056	0.250008	0.250593	0.254369	0.252577	0.247082
Tubalar	Turkic	0.265284	0.267203	0.267569	0.271011	0.271363	0.271428	0.268388	0.265795	0.269706	0.271616	0.271384	0.270996	0.265582	0.26864	0.263612	0.264215	0.268536	0.271058	0.264909	0.269635	0.267719	0.266516	0.250963	0.246604	0.249289	0.250095	0.249789	0.25017	0.250389	0.250663	0.279789	0.279895	0.264266	0.279982	0.279482	0.272399	0.273152	0.273877	0.27217	0.274052	0.244462	0.249374	0.253199	0.255589	0.256119	0.258079	0.256821	0.252293
Tuvinian	Turkic	0.277515	0.280308	0.281526	0.285612	0.285957	0.28612	0.282467	0.279056	0.284539	0.286222	0.286867	0.286301	0.277097	0.282834	0.275298	0.276059	0.283369	0.28626	0.276611	0.283942	0.281064	0.279814	0.244843	0.239186	0.242217	0.243734	0.24246	0.243766	0.242188	0.242735	0.29263	0.293767	0.262741	0.292476	0.290996	0.287271	0.288388	0.28921	0.287498	0.289708	0.236804	0.242968	0.244811	0.248498	0.249564	0.252382	0.250573	0.246465
Uyghur_HGDP	Turkic	0.262706	0.264322	0.264635	0.267767	0.268119	0.268249	0.264933	0.262519	0.266605	0.268258	0.268427	0.267959	0.262708	0.26575	0.261039	0.261684	0.265837	0.267697	0.262028	0.266713	0.264518	0.263263	0.251241	0.247987	0.249692	0.250509	0.250451	0.250232	0.250573	0.250758	0.270047	0.270639	0.259622	0.270251	0.269336	0.268643	0.26951	0.269765	0.268847	0.270638	0.245558	0.249931	0.251952	0.253137	0.253869	0.254831	0.254257	0.25185
Uzbek_Khorezm	Turkic	0.253002	0.253407	0.253582	0.256556	0.256923	0.257164	0.254805	0.252226	0.255476	0.257124	0.257054	0.256754	0.253497	0.254982	0.251882	0.252682	0.254491	0.256636	0.25281	0.256032	0.255191	0.253085	0.25435	0.252956	0.2541	0.254077	0.254423	0.254058	0.254881	0.255015	0.26205	0.261825	0.259801	0.261737	0.261045	0.25699	0.257582	0.257895	0.256441	0.258714	0.250656	0.254019	0.256898	0.257261	0.25792	0.257899	0.257916	0.254457
Uzbek_Tashkent	Turkic	0.252415	0.253441	0.25319	0.256003	0.256293	0.256018	0.254097	0.251736	0.254627	0.255899	0.256397	0.256076	0.252765	0.254255	0.251116	0.251508	0.254345	0.256019	0.252521	0.254848	0.254015	0.252196	0.25421	0.253035	0.253984	0.253888	0.254691	0.254135	0.254903	0.255073	0.260455	0.260322	0.258882	0.260625	0.259979	0.256326	0.25705	0.25755	0.255873	0.257713	0.250266	0.253641	0.256539	0.256985	0.257401	0.257393	0.257212	0.254284
Yakut_HGDP	Turkic	0.280248	0.283403	0.284117	0.288804	0.289086	0.289471	0.2857	0.281816	0.287933	0.289599	0.290149	0.289784	0.280062	0.285966	0.278016	0.278542	0.285783	0.289494	0.278986	0.287005	0.283765	0.283007	0.244106	0.237811	0.241346	0.243038	0.241567	0.243283	0.240556	0.241285	0.297115	0.29889	0.263815	0.297036	0.295177	0.29065	0.291872	0.292881	0.290937	0.293355	0.235839	0.242201	0.243659	0.247777	0.248449	0.251965	0.249661	0.245876
Yukagir	Turkic	0.275707	0.278506	0.279272	0.283129	0.283572	0.283864	0.280541	0.276698	0.282347	0.284103	0.2844	0.283991	0.27543	0.280724	0.273806	0.274138	0.281077	0.284055	0.274881	0.281836	0.278791	0.27801	0.246033	0.23999	0.243295	0.244766	0.24385	0.245342	0.243385	0.243738	0.305996	0.306603	0.267484	0.303943	0.302152	0.284982	0.285922	0.286749	0.285059	0.287342	0.238187	0.244048	0.247227	0.251295	0.252217	0.255643	0.253692	0.247299
Nogai	Turkic	0.245857	0.246101	0.245775	0.24803	0.248346	0.248114	0.246464	0.244725	0.246857	0.248346	0.248378	0.248051	0.246329	0.246752	0.244495	0.244936	0.246522	0.248012	0.24572	0.247392	0.246451	0.244389	0.260196	0.259864	0.260302	0.25999	0.260257	0.259431	0.260946	0.260467	0.254268	0.253727	0.259431	0.254137	0.253522	0.248412	0.248427	0.24892	0.247988	0.24924	0.255197	0.259628	0.262109	0.261669	0.262043	0.261388	0.261419	0.257081
Nogai2	Turkic	0.262556	0.263955	0.264329	0.267744	0.268154	0.268244	0.265428	0.26261	0.266753	0.268183	0.268374	0.268214	0.262615	0.265388	0.260937	0.261579	0.265955	0.268023	0.262221	0.266488	0.265057	0.262924	0.253035	0.249907	0.251741	0.25236	0.252246	0.252563	0.252071	0.252339	0.272716	0.273283	0.26228	0.272775	0.271612	0.268656	0.26938	0.27031	0.268612	0.270501	0.246915	0.252049	0.255114	0.256644	0.257049	0.257724	0.257386	0.252543
Shor_Khakassia	Turkic	0.266525	0.26886	0.268984	0.272581	0.272727	0.272477	0.270077	0.267882	0.271281	0.272813	0.27305	0.272289	0.266541	0.270334	0.265114	0.265485	0.269831	0.272239	0.265843	0.271093	0.268977	0.268197	0.249814	0.24535	0.248522	0.249368	0.248933	0.249108	0.249392	0.249623	0.282142	0.28249	0.264838	0.282227	0.281603	0.273658	0.274293	0.275447	0.273824	0.275478	0.24395	0.248883	0.252627	0.255228	0.256112	0.257583	0.256674	0.252035
Shor_Mountain	Turkic	0.266038	0.26774	0.268352	0.272423	0.272234	0.272372	0.269075	0.266932	0.270826	0.2722	0.272283	0.272407	0.266094	0.269457	0.264249	0.264656	0.268987	0.272137	0.265406	0.270429	0.268173	0.267106	0.250728	0.245983	0.249175	0.250051	0.24942	0.250004	0.250157	0.250647	0.281761	0.2816	0.264948	0.2824	0.281357	0.273265	0.273829	0.274962	0.273348	0.275221	0.244224	0.249555	0.253207	0.255563	0.256283	0.25795	0.256957	0.252499
Karelian	Uralic	0.239379	0.238618	0.238348	0.240055	0.240314	0.240095	0.239014	0.238042	0.238389	0.23999	0.239814	0.239311	0.240023	0.239076	0.238608	0.238843	0.238441	0.23926	0.239469	0.239552	0.239601	0.237783	0.265196	0.264479	0.265878	0.26545	0.266453	0.265377	0.268437	0.267739	0.250967	0.249489	0.268284	0.250596	0.250442	0.239952	0.240307	0.240289	0.239445	0.240498	0.261246	0.265006	0.277148	0.276505	0.277684	0.276739	0.27784	0.263598
Mansi	Uralic	0.259907	0.261223	0.261615	0.264512	0.264894	0.264752	0.262732	0.260081	0.263014	0.265122	0.265408	0.264946	0.259953	0.263054	0.258683	0.259031	0.262478	0.264864	0.259608	0.263355	0.262099	0.260313	0.25394	0.249824	0.252457	0.253305	0.253084	0.25366	0.254242	0.254349	0.280227	0.279856	0.267389	0.279838	0.279009	0.265894	0.266139	0.266766	0.265174	0.267273	0.247309	0.252665	0.259025	0.261516	0.262783	0.265242	0.263734	0.255832
Mordovian	Uralic	0.237862	0.237514	0.236841	0.238541	0.238984	0.238715	0.237506	0.236477	0.237052	0.238786	0.238722	0.238337	0.238677	0.237795	0.23722	0.237869	0.236928	0.238263	0.238428	0.238377	0.238591	0.236286	0.264809	0.264426	0.265481	0.264965	0.265919	0.264932	0.267718	0.267461	0.248855	0.247054	0.266374	0.248544	0.248549	0.238583	0.238824	0.239112	0.237879	0.239199	0.261154	0.264422	0.275816	0.274155	0.274387	0.272384	0.274023	0.26281
Nganasan	Uralic	0.281087	0.284394	0.285653	0.290102	0.290318	0.290749	0.286688	0.282447	0.288928	0.290671	0.291603	0.291016	0.28057	0.286909	0.27891	0.279443	0.287472	0.291084	0.28027	0.288205	0.284581	0.283997	0.242437	0.23535	0.239145	0.241115	0.239458	0.241808	0.238841	0.239454	0.30818	0.309312	0.265814	0.306926	0.305214	0.292181	0.29287	0.294061	0.292233	0.294615	0.233651	0.240189	0.242196	0.247598	0.248584	0.253462	0.250937	0.244177
Selkup	Uralic	0.26642	0.268271	0.26923	0.272276	0.272691	0.272924	0.269859	0.266845	0.270899	0.272652	0.272563	0.272347	0.266398	0.270015	0.265219	0.265508	0.269955	0.272548	0.265797	0.270772	0.269256	0.26764	0.250705	0.245691	0.248707	0.250005	0.24932	0.250465	0.250431	0.250589	0.288513	0.288734	0.267532	0.288654	0.287479	0.273715	0.274247	0.275101	0.273493	0.275639	0.243298	0.249105	0.254058	0.257441	0.258306	0.261138	0.259348	0.252681
Udmurt	Uralic	0.24752	0.247388	0.247477	0.249789	0.250052	0.249878	0.24808	0.246634	0.248011	0.249773	0.249931	0.249458	0.247899	0.248307	0.246293	0.247095	0.248206	0.24966	0.247309	0.24903	0.24835	0.246513	0.260334	0.258407	0.26008	0.26015	0.260674	0.260109	0.262262	0.26253	0.262564	0.261511	0.26653	0.262787	0.262054	0.249989	0.25035	0.25091	0.249597	0.25095	0.255599	0.259639	0.267647	0.268709	0.268611	0.269332	0.269485	0.260299
Veps	Uralic	0.239556	0.239432	0.238859	0.240821	0.241001	0.24078	0.239574	0.238395	0.238981	0.240827	0.240734	0.240256	0.240383	0.239851	0.239035	0.239644	0.239576	0.23974	0.240128	0.239818	0.240407	0.238408	0.264463	0.263905	0.264924	0.264536	0.265437	0.264642	0.266945	0.266893	0.251952	0.250754	0.268273	0.251732	0.251947	0.240815	0.241003	0.241145	0.23994	0.241454	0.260845	0.264265	0.276207	0.275843	0.276975	0.276523	0.27724	0.26297
Boisman_MN	Ancient_Russia	0.288269	0.291715	0.292809	0.29796	0.29824	0.298648	0.293922	0.289806	0.297174	0.298781	0.300252	0.29936	0.286982	0.295169	0.285103	0.285949	0.295968	0.299693	0.286443	0.296566	0.292213	0.291963	0.237267	0.230596	0.233759	0.236562	0.23425	0.236792	0.232352	0.233355	0.30156	0.304483	0.259935	0.301906	0.300113	0.299889	0.301177	0.302301	0.2998	0.303158	0.228865	0.235245	0.235149	0.239652	0.240962	0.244757	0.242795	0.238661
DevilsCave_N	Ancient_Russia	0.286839	0.291064	0.292218	0.297866	0.297777	0.297668	0.293601	0.288905	0.295936	0.297876	0.299617	0.299045	0.286738	0.294318	0.283962	0.285225	0.29544	0.299567	0.286159	0.295642	0.291119	0.29115	0.237912	0.230995	0.234512	0.236561	0.234648	0.236818	0.233242	0.233739	0.300228	0.303392	0.259961	0.300236	0.300035	0.299136	0.300585	0.301842	0.29922	0.302917	0.228856	0.235741	0.235506	0.239691	0.241103	0.245035	0.242005	0.239301
Ekven_IA	Ancient_Russia	0.275452	0.27737	0.278444	0.282907	0.283225	0.283319	0.279876	0.275108	0.281647	0.283261	0.284278	0.283829	0.27499	0.280476	0.272984	0.273975	0.280746	0.283472	0.274616	0.28198	0.278586	0.27812	0.242625	0.236253	0.239966	0.241756	0.240706	0.241621	0.241013	0.241277	0.324767	0.310881	0.277199	0.337313	0.343775	0.284323	0.284995	0.286297	0.284028	0.286877	0.234508	0.240831	0.243621	0.248078	0.248627	0.251847	0.250449	0.246266
Russia_Afanasievo	Ancient_Russia	0.235141	0.233796	0.23377	0.235225	0.23538	0.23504	0.233906	0.233258	0.23327	0.235168	0.235071	0.2351	0.235854	0.234332	0.234394	0.235042	0.233834	0.234477	0.235556	0.234962	0.235361	0.232896	0.264821	0.264898	0.266027	0.265099	0.267061	0.265228	0.271659	0.270949	0.247986	0.246034	0.265125	0.248305	0.248479	0.234786	0.234925	0.234894	0.234213	0.235178	0.26118	0.265074	0.272961	0.271794	0.271556	0.270806	0.271698	0.265718
Russia_Alan	Ancient_Russia	0.233329	0.232006	0.232342	0.233771	0.233888	0.233824	0.232674	0.231179	0.231987	0.23377	0.233453	0.233465	0.234291	0.233121	0.232978	0.233178	0.232281	0.233352	0.234114	0.233383	0.233995	0.231045	0.26467	0.266189	0.265978	0.265161	0.266322	0.264538	0.267576	0.266801	0.24172	0.240487	0.258236	0.241838	0.241285	0.233154	0.233034	0.233276	0.232289	0.233449	0.262081	0.265537	0.267606	0.265765	0.266185	0.263816	0.265048	0.261204
Russia_Andronovo	Ancient_Russia	0.234653	0.234069	0.233353	0.234388	0.234657	0.234557	0.233214	0.233021	0.233233	0.234509	0.23442	0.234502	0.235041	0.233826	0.234031	0.234148	0.233081	0.233863	0.234873	0.234796	0.234964	0.23255	0.263987	0.262876	0.264256	0.263292	0.263985	0.264314	0.268488	0.267497	0.246104	0.244636	0.263772	0.246212	0.246445	0.234346	0.234809	0.234223	0.234377	0.234559	0.260187	0.263103	0.272688	0.271345	0.270819	0.269511	0.270715	0.263466
Russia_BA_Okunevo	Ancient_Russia	0.257647	0.25841	0.259458	0.261715	0.26219	0.262093	0.259766	0.257579	0.260546	0.262159	0.262263	0.26252	0.257889	0.260336	0.256041	0.256957	0.259735	0.262069	0.257779	0.260627	0.259811	0.258131	0.252914	0.249264	0.252209	0.252412	0.25295	0.252518	0.255781	0.255486	0.278394	0.277915	0.267805	0.27997	0.279656	0.262619	0.263266	0.263466	0.26252	0.263846	0.246828	0.252101	0.257972	0.260041	0.260065	0.26137	0.261264	0.257072
Russia_Bolshoy	Ancient_Russia	0.257304	0.258271	0.258914	0.261366	0.261607	0.262018	0.259246	0.25746	0.260299	0.261649	0.261594	0.261479	0.257561	0.259629	0.256284	0.256443	0.259563	0.261275	0.257199	0.259674	0.259125	0.257581	0.253056	0.248217	0.251414	0.252833	0.25252	0.25324	0.255002	0.255351	0.279091	0.278187	0.268255	0.278916	0.279085	0.262218	0.263048	0.263128	0.262166	0.263071	0.246056	0.252004	0.2602	0.263002	0.263665	0.26502	0.264958	0.25585
Russia_Caucasus_EBA_Yamnaya	Ancient_Russia	0.233629	0.231764	0.232325	0.233912	0.233644	0.233415	0.232002	0.23161	0.230893	0.233665	0.23349	0.233482	0.234289	0.232162	0.232701	0.233483	0.230992	0.233178	0.233838	0.232686	0.233659	0.231572	0.262427	0.26276	0.264076	0.2633	0.264756	0.263106	0.270704	0.268089	0.246495	0.24448	0.263912	0.246879	0.24763	0.233417	0.233511	0.233467	0.232859	0.233388	0.25915	0.263014	0.270479	0.26948	0.269304	0.268654	0.270123	0.264471
Russia_EarlySarmatian_SouthernUrals	Ancient_Russia	0.240108	0.239342	0.239436	0.240646	0.241245	0.241305	0.239398	0.238299	0.239789	0.240949	0.240972	0.240091	0.240722	0.240226	0.239289	0.240157	0.239236	0.240869	0.240458	0.240266	0.240703	0.238426	0.260997	0.260694	0.261923	0.261459	0.26302	0.261767	0.265244	0.265233	0.251489	0.250587	0.263198	0.251438	0.251132	0.2412	0.241048	0.241466	0.240307	0.240955	0.258295	0.261269	0.268291	0.267589	0.267714	0.268028	0.268077	0.261959
Russia_EBA_Yamnaya_Kalmykia	Ancient_Russia	0.232948	0.232357	0.230747	0.232881	0.232986	0.232862	0.231998	0.231702	0.230884	0.232968	0.233151	0.232254	0.23341	0.231907	0.232469	0.232637	0.232571	0.232593	0.233088	0.232494	0.23369	0.230422	0.263182	0.262723	0.263476	0.263581	0.264753	0.26255	0.26918	0.268518	0.245845	0.24413	0.262637	0.246094	0.245957	0.232572	0.233134	0.233069	0.232337	0.233013	0.25881	0.26253	0.2708	0.269848	0.269136	0.268874	0.270121	0.263651
Russia_EBA_Yamnaya_Samara	Ancient_Russia	0.234408	0.233852	0.232845	0.234391	0.234863	0.234186	0.233065	0.232668	0.232493	0.234946	0.234503	0.233847	0.235451	0.233871	0.23395	0.234322	0.233599	0.234032	0.235065	0.234561	0.234355	0.232483	0.26465	0.264879	0.266043	0.26505	0.267099	0.265542	0.272098	0.271106	0.247865	0.245774	0.265281	0.248001	0.248327	0.234018	0.234585	0.234319	0.233177	0.233951	0.261388	0.26489	0.273363	0.271969	0.272327	0.271382	0.27207	0.265559
Russia_IA	Ancient_Russia	0.252566	0.252989	0.253338	0.255962	0.256013	0.255779	0.25371	0.252374	0.254334	0.256118	0.256262	0.255982	0.252577	0.254276	0.251074	0.251281	0.253986	0.256002	0.251902	0.254734	0.254096	0.252619	0.255349	0.252404	0.254507	0.254961	0.255198	0.255053	0.256786	0.256518	0.265668	0.264724	0.263709	0.26557	0.265057	0.256266	0.257009	0.257215	0.255583	0.257247	0.25005	0.254539	0.260942	0.261707	0.262403	0.262888	0.262213	0.256387
Russia_Karasuk	Ancient_Russia	0.246731	0.247083	0.246934	0.249077	0.249533	0.249409	0.247322	0.245668	0.247667	0.249521	0.24947	0.249734	0.247376	0.248026	0.245855	0.246397	0.24695	0.249011	0.247012	0.248279	0.247948	0.246129	0.257698	0.255433	0.25743	0.257298	0.258219	0.257694	0.260496	0.260209	0.26172	0.260885	0.264793	0.262192	0.262517	0.249436	0.250217	0.250189	0.249186	0.250109	0.253334	0.257253	0.264494	0.264611	0.26501	0.265471	0.265267	0.259418
Russia_Late_Sarmatian	Ancient_Russia	0.240193	0.239552	0.238731	0.240842	0.241077	0.240737	0.239636	0.238712	0.239494	0.241058	0.24095	0.240841	0.240399	0.239477	0.239147	0.23958	0.239283	0.240058	0.240424	0.240172	0.240468	0.23776	0.263248	0.262474	0.263788	0.26336	0.265131	0.263472	0.266627	0.266837	0.251916	0.250106	0.264433	0.251675	0.25107	0.24068	0.241276	0.241276	0.240643	0.241237	0.259111	0.262792	0.269639	0.268393	0.268772	0.267759	0.268482	0.263403
Russia_Lokomotiv_Eneolithic	Ancient_Russia	0.280781	0.283821	0.286044	0.290101	0.290368	0.290301	0.28697	0.282102	0.288642	0.290503	0.291067	0.290066	0.279917	0.286749	0.278334	0.279518	0.286675	0.290486	0.279993	0.288446	0.285165	0.284261	0.238154	0.231463	0.234944	0.236628	0.235271	0.237436	0.233173	0.234872	0.300763	0.304137	0.261251	0.300908	0.299465	0.291602	0.292854	0.294908	0.291887	0.294632	0.229161	0.235801	0.236663	0.241436	0.242125	0.246289	0.243884	0.240242
Russia_MLBA_Krasnoyarsk	Ancient_Russia	0.235165	0.234146	0.233391	0.235318	0.235291	0.235138	0.234176	0.234028	0.233293	0.235254	0.235151	0.234983	0.235787	0.234302	0.234461	0.235171	0.232939	0.234278	0.235504	0.234762	0.23481	0.233073	0.26443	0.264292	0.265331	0.264757	0.266073	0.265011	0.268576	0.268241	0.246445	0.244294	0.264142	0.24676	0.246567	0.234928	0.235347	0.235046	0.234402	0.235127	0.260879	0.264397	0.273763	0.272324	0.272306	0.271153	0.271953	0.264393
Russia_MLBA_Sintashta	Ancient_Russia	0.233233	0.232272	0.231583	0.233008	0.233223	0.233105	0.232142	0.231929	0.231339	0.233187	0.232908	0.232756	0.233904	0.232298	0.232856	0.233201	0.230905	0.232543	0.233694	0.23299	0.233087	0.231295	0.264672	0.264975	0.265778	0.265145	0.266297	0.265065	0.269283	0.268722	0.243829	0.241881	0.26418	0.243646	0.243819	0.232746	0.233013	0.232982	0.232347	0.233049	0.261557	0.264963	0.274624	0.272955	0.27253	0.27138	0.272539	0.264556
Russia_North_Caucasus	Ancient_Russia	0.234174	0.232985	0.232726	0.23421	0.233898	0.233524	0.233129	0.232265	0.232593	0.234308	0.233718	0.233761	0.234729	0.233059	0.233824	0.234268	0.232454	0.233542	0.234067	0.233394	0.233767	0.231187	0.263667	0.264213	0.264903	0.264018	0.266301	0.26442	0.270848	0.26934	0.245859	0.243976	0.262819	0.245776	0.246176	0.233665	0.234481	0.23415	0.233039	0.233743	0.2602	0.263866	0.270563	0.26943	0.268744	0.268269	0.269346	0.264122
Russia_OldBeringSea_Ekven	Ancient_Russia	0.277176	0.279394	0.280734	0.284847	0.285263	0.285124	0.281879	0.277845	0.283421	0.28544	0.285916	0.285802	0.276827	0.282236	0.274965	0.275872	0.283054	0.285074	0.276628	0.283424	0.280061	0.280039	0.244095	0.23734	0.241154	0.243217	0.242086	0.243217	0.242246	0.242649	0.327469	0.313057	0.278891	0.339363	0.346393	0.286229	0.286984	0.288172	0.286188	0.288912	0.236061	0.242083	0.24475	0.249152	0.249912	0.253133	0.251592	0.24738
Russia_Poltavka	Ancient_Russia	0.236111	0.234761	0.234774	0.23609	0.236523	0.236016	0.234874	0.233748	0.234509	0.236295	0.236426	0.235418	0.236874	0.235356	0.235168	0.23626	0.235127	0.235907	0.236488	0.235736	0.236501	0.233992	0.265414	0.26501	0.266563	0.265426	0.267387	0.266068	0.272141	0.271582	0.249213	0.247273	0.266171	0.24959	0.249583	0.236156	0.236078	0.235832	0.235547	0.235975	0.261619	0.265423	0.273868	0.272949	0.27288	0.272177	0.272708	0.266324
Russia_Sarmatian	Ancient_Russia	0.236621	0.235923	0.23606	0.237895	0.237879	0.237898	0.235891	0.235249	0.2359	0.23768	0.237402	0.237664	0.236993	0.23669	0.236081	0.236416	0.235703	0.237288	0.236681	0.237076	0.237098	0.234635	0.260231	0.26015	0.260993	0.260092	0.261588	0.260287	0.264366	0.263506	0.247931	0.246205	0.260753	0.24821	0.248342	0.237147	0.237568	0.237366	0.237412	0.237388	0.25681	0.260177	0.266862	0.266008	0.266187	0.265021	0.266179	0.260122
Russia_Shamanka_EBA	Ancient_Russia	0.277856	0.280858	0.282037	0.286367	0.286504	0.286184	0.283755	0.279497	0.284894	0.28602	0.287346	0.286902	0.277343	0.283471	0.275947	0.277072	0.284063	0.28682	0.277244	0.284296	0.281497	0.280761	0.242629	0.235764	0.240146	0.241683	0.240072	0.241971	0.239561	0.240207	0.299661	0.301351	0.26464	0.300277	0.299322	0.287685	0.289226	0.29008	0.288233	0.290422	0.234294	0.240631	0.24225	0.246747	0.247817	0.250665	0.248712	0.245793
Russia_Shamanka_Eneolithic	Ancient_Russia	0.28202	0.285263	0.286607	0.291295	0.291362	0.291252	0.288365	0.283531	0.290124	0.291343	0.292056	0.291111	0.281076	0.28756	0.279589	0.279809	0.289003	0.291885	0.280866	0.289296	0.285556	0.284839	0.238871	0.231835	0.23577	0.237771	0.236511	0.238034	0.234791	0.235694	0.30096	0.30396	0.261738	0.300929	0.299604	0.293199	0.293903	0.295685	0.293204	0.295672	0.230266	0.236866	0.237662	0.242346	0.243279	0.246801	0.24474	0.241058
Russia_Sintashta_MLBA	Ancient_Russia	0.231071	0.229568	0.229204	0.230526	0.23011	0.230541	0.229571	0.228782	0.228666	0.230159	0.230057	0.230373	0.231631	0.230014	0.230645	0.231158	0.22881	0.230389	0.231271	0.230217	0.231381	0.228271	0.262498	0.26245	0.263598	0.262987	0.264109	0.263366	0.26659	0.266488	0.240679	0.238994	0.260899	0.239615	0.240427	0.230168	0.230773	0.230155	0.228936	0.230129	0.259241	0.262754	0.272469	0.270582	0.270298	0.269418	0.270133	0.26138
Russia_Srubnaya	Ancient_Russia	0.234381	0.233122	0.232603	0.234289	0.234732	0.234456	0.23371	0.232912	0.232609	0.234433	0.23452	0.234231	0.235288	0.233682	0.233873	0.234057	0.233163	0.234012	0.234572	0.234113	0.234489	0.232482	0.265881	0.265805	0.267072	0.266171	0.267774	0.266235	0.270333	0.269982	0.245236	0.24313	0.265551	0.245499	0.245204	0.234494	0.234177	0.234257	0.23362	0.234297	0.262758	0.265912	0.275672	0.27405	0.273819	0.27236	0.274052	0.265618
Russia_Srubnaya_Alakul	Ancient_Russia	0.235122	0.233736	0.233577	0.234954	0.235391	0.235012	0.234002	0.233305	0.233206	0.234812	0.235154	0.234969	0.235677	0.234589	0.23437	0.234919	0.233804	0.234828	0.235723	0.234689	0.23544	0.233156	0.265349	0.265746	0.266742	0.265812	0.26756	0.266258	0.270473	0.269856	0.246477	0.244496	0.265887	0.246543	0.246747	0.23483	0.235214	0.235271	0.234183	0.235026	0.262138	0.265713	0.275325	0.273775	0.273728	0.2724	0.273178	0.265377
Russia_Steppe_Maikop	Ancient_Russia	0.23909	0.238489	0.238222	0.239726	0.240132	0.240071	0.238636	0.237642	0.238357	0.240279	0.240247	0.239878	0.240078	0.239615	0.239004	0.23922	0.238373	0.239673	0.239983	0.239293	0.239217	0.238087	0.260163	0.259047	0.261462	0.260549	0.262395	0.260844	0.267065	0.266308	0.256968	0.255414	0.265245	0.258154	0.258865	0.239816	0.24045	0.240541	0.239484	0.240335	0.256794	0.260138	0.267092	0.267473	0.267762	0.266758	0.267821	0.264241
Russia_Tagar	Ancient_Russia	0.242744	0.242909	0.242459	0.244142	0.244751	0.244294	0.24282	0.241399	0.242693	0.244088	0.244621	0.244431	0.243068	0.243239	0.241889	0.242548	0.242164	0.243675	0.243265	0.243876	0.243722	0.241754	0.259734	0.258708	0.260053	0.259959	0.261123	0.260014	0.263179	0.262556	0.255974	0.254869	0.264673	0.256366	0.25653	0.244271	0.245021	0.245054	0.243633	0.245153	0.255845	0.259658	0.267085	0.267008	0.267225	0.266389	0.267184	0.260457
Russia_UstBelaya_Angara	Ancient_Russia	0.277577	0.279391	0.281281	0.285241	0.28554	0.285365	0.281693	0.278382	0.284196	0.285454	0.286133	0.286061	0.277131	0.282356	0.27511	0.275821	0.283228	0.286151	0.276278	0.283893	0.280923	0.280041	0.243742	0.237452	0.241219	0.242811	0.241951	0.242935	0.241363	0.242115	0.299451	0.301314	0.266344	0.300182	0.299232	0.28669	0.28821	0.289142	0.287279	0.28947	0.235783	0.242206	0.244323	0.248161	0.249099	0.252739	0.250704	0.246965
Russia_UstIda_EBA	Ancient_Russia	0.275264	0.27706	0.279059	0.282058	0.282805	0.283076	0.280177	0.27626	0.281304	0.282231	0.28356	0.283294	0.274349	0.280236	0.273076	0.273473	0.279584	0.283369	0.274639	0.280922	0.278356	0.277321	0.241823	0.236148	0.239394	0.2407	0.239823	0.241382	0.238602	0.240142	0.295967	0.297998	0.263505	0.296617	0.296053	0.284572	0.285212	0.286252	0.284178	0.286285	0.234057	0.239728	0.241891	0.246015	0.247422	0.250008	0.248355	0.244732
Russia_UstIda_LN	Ancient_Russia	0.272427	0.275043	0.27694	0.279477	0.280343	0.280798	0.277015	0.273283	0.278505	0.28047	0.281118	0.28019	0.271761	0.277248	0.269774	0.271214	0.278082	0.280713	0.272001	0.278863	0.276356	0.274561	0.240441	0.234215	0.238244	0.239489	0.238863	0.239802	0.2382	0.239175	0.294252	0.294581	0.263032	0.295041	0.293908	0.282049	0.282445	0.283181	0.281833	0.283861	0.23242	0.23902	0.241395	0.245524	0.24535	0.249605	0.247695	0.244684
UstBelaya_EBA	Ancient_Russia	0.278212	0.280737	0.282293	0.286149	0.28663	0.286257	0.282918	0.279137	0.28467	0.286338	0.286919	0.286976	0.277886	0.282867	0.276028	0.276457	0.283561	0.286801	0.276818	0.284585	0.281585	0.280562	0.243597	0.236908	0.240594	0.24252	0.241312	0.24247	0.241373	0.24155	0.300169	0.302006	0.265986	0.30068	0.299999	0.287862	0.288715	0.290001	0.288293	0.290648	0.235223	0.241615	0.243591	0.247522	0.248761	0.252255	0.250026	0.246498
Banlashan_MN	Ancient_China	0.290199	0.292869	0.294141	0.300518	0.300085	0.300457	0.295592	0.290122	0.29898	0.30047	0.301948	0.300274	0.288448	0.295845	0.286087	0.285971	0.297222	0.301369	0.287471	0.297525	0.294289	0.293242	0.238006	0.230771	0.234749	0.23657	0.235556	0.236559	0.233702	0.233583	0.297248	0.299362	0.259506	0.29657	0.295074	0.301854	0.303494	0.304991	0.303301	0.305794	0.228775	0.236122	0.23557	0.240363	0.241253	0.243544	0.241822	0.239356
Bianbian_EN	Ancient_China	0.287455	0.29225	0.291877	0.298328	0.298462	0.298379	0.294761	0.28942	0.296856	0.298207	0.300599	0.29845	0.285679	0.294666	0.284531	0.284729	0.295194	0.299736	0.286124	0.297049	0.293593	0.292449	0.233038	0.22751	0.230771	0.232791	0.231656	0.232511	0.230028	0.230557	0.289738	0.291799	0.25414	0.290494	0.288609	0.29998	0.300469	0.301871	0.299834	0.303472	0.226047	0.231297	0.23212	0.235885	0.236565	0.240916	0.237859	0.235534
Boshan_EN	Ancient_China	0.288339	0.292149	0.293143	0.299708	0.300259	0.300145	0.295234	0.29006	0.298187	0.300492	0.30133	0.301698	0.287961	0.296306	0.285219	0.286589	0.298153	0.300638	0.287302	0.297194	0.29434	0.29429	0.235251	0.229054	0.232143	0.233821	0.232835	0.234475	0.231596	0.231653	0.29327	0.294595	0.256114	0.292945	0.29149	0.301614	0.301776	0.304275	0.30385	0.305616	0.22751	0.233046	0.233243	0.237511	0.238429	0.242286	0.239822	0.237509
China_Tianyuan	Ancient_China	0.254921	0.25606	0.257025	0.257209	0.257415	0.258186	0.257475	0.257054	0.257206	0.25782	0.257683	0.257674	0.253907	0.257702	0.254503	0.25479	0.258077	0.257675	0.254872	0.258741	0.254445	0.255423	0.223786	0.219968	0.222003	0.222887	0.2227	0.223311	0.221556	0.221836	0.253042	0.254329	0.235724	0.253204	0.252753	0.258757	0.258937	0.257044	0.258123	0.25781	0.218491	0.222564	0.224541	0.226028	0.227017	0.227349	0.227514	0.226439
Chuanyun_H	Ancient_China	0.291716	0.296918	0.296455	0.302359	0.302689	0.303289	0.298344	0.29618	0.302797	0.303784	0.305561	0.304815	0.291012	0.300329	0.288955	0.289514	0.30001	0.305659	0.290699	0.302293	0.295671	0.294992	0.233509	0.227047	0.230082	0.232206	0.231384	0.232842	0.229989	0.230145	0.286184	0.288731	0.252375	0.286822	0.284106	0.304713	0.30586	0.305305	0.303453	0.306618	0.226032	0.231919	0.231362	0.23531	0.237108	0.239035	0.23794	0.236127
Dacaozi_IA	Ancient_China	0.292782	0.297273	0.298387	0.303987	0.304258	0.304181	0.299704	0.295316	0.303385	0.304774	0.305053	0.30443	0.292749	0.300312	0.289971	0.291161	0.301992	0.304621	0.291025	0.301802	0.297355	0.29661	0.238847	0.232204	0.23541	0.23697	0.236097	0.237726	0.233816	0.234578	0.292402	0.294512	0.258271	0.293331	0.291244	0.306033	0.307076	0.30845	0.306328	0.30954	0.23005	0.236505	0.236617	0.240243	0.240961	0.243854	0.242253	0.240541
Erdaojingzi_LN	Ancient_China	0.291133	0.294938	0.295876	0.302619	0.302085	0.302367	0.298215	0.292361	0.301278	0.30254	0.303382	0.302634	0.290061	0.297647	0.288111	0.287999	0.300324	0.30242	0.288908	0.300021	0.295533	0.294741	0.236392	0.229772	0.232697	0.234794	0.233225	0.234885	0.231007	0.232181	0.290608	0.293329	0.256498	0.291056	0.289422	0.304919	0.30503	0.307051	0.304647	0.307439	0.227827	0.233961	0.233739	0.238001	0.239096	0.241846	0.239901	0.238171
Haminmangha_MN	Ancient_China	0.287261	0.290953	0.290431	0.295746	0.295993	0.296085	0.292657	0.287446	0.29554	0.296667	0.297349	0.296242	0.285163	0.292716	0.283924	0.284434	0.291697	0.295893	0.285998	0.294179	0.289027	0.288296	0.238878	0.231556	0.234931	0.237071	0.234947	0.237073	0.234123	0.234168	0.300338	0.30241	0.260883	0.30126	0.298414	0.297299	0.298992	0.301382	0.297484	0.301674	0.22969	0.237044	0.236355	0.241094	0.24241	0.244092	0.242282	0.240492
Haojiatai_LBIA	Ancient_China	0.292265	0.29669	0.297242	0.302829	0.303204	0.303724	0.297971	0.292298	0.30239	0.303383	0.305582	0.303545	0.290878	0.299367	0.288992	0.28934	0.298823	0.303432	0.289648	0.300849	0.296869	0.295815	0.237242	0.229477	0.234049	0.23453	0.233438	0.235049	0.232569	0.233154	0.289675	0.291355	0.255693	0.290037	0.289427	0.305416	0.306685	0.308034	0.305481	0.308349	0.228814	0.23441	0.234157	0.238218	0.238248	0.241498	0.240134	0.238116
Haojiatai_LN	Ancient_China	0.291946	0.296211	0.296897	0.302984	0.303145	0.303154	0.297742	0.292022	0.302039	0.303956	0.303659	0.303613	0.290819	0.299102	0.288984	0.289278	0.300195	0.303329	0.290067	0.300222	0.296155	0.295342	0.236106	0.22915	0.232595	0.23415	0.232728	0.234778	0.231588	0.232378	0.289573	0.291746	0.255366	0.290183	0.288635	0.305265	0.306553	0.307513	0.305313	0.308069	0.227632	0.234038	0.233393	0.237721	0.238012	0.242001	0.239979	0.237638
Jiaozuoniecun_LBIA	Ancient_China	0.291415	0.296408	0.297688	0.303197	0.30358	0.303864	0.299275	0.294182	0.302447	0.303437	0.304891	0.303815	0.291407	0.300314	0.288437	0.289908	0.302608	0.30499	0.289756	0.301704	0.296775	0.296186	0.236468	0.228778	0.232571	0.234543	0.232856	0.234773	0.231557	0.231632	0.290553	0.292514	0.255791	0.291051	0.288757	0.305173	0.306771	0.308002	0.306065	0.308565	0.227023	0.233724	0.233386	0.237335	0.238407	0.241252	0.239786	0.237487
Jinchankou_LN	Ancient_China	0.291529	0.296329	0.297741	0.302474	0.302644	0.303594	0.300439	0.295103	0.300614	0.302975	0.303302	0.300325	0.290978	0.298293	0.288409	0.289231	0.299066	0.301784	0.288385	0.300043	0.296021	0.292754	0.237914	0.231217	0.234582	0.236344	0.233949	0.23647	0.233653	0.233931	0.293496	0.296435	0.257962	0.294958	0.292615	0.303981	0.305254	0.308279	0.305633	0.308603	0.229747	0.235671	0.235477	0.239846	0.240982	0.244449	0.241444	0.240399
Lajia_LN	Ancient_China	0.290123	0.294949	0.295696	0.300935	0.300994	0.301243	0.297888	0.292449	0.299413	0.301073	0.30175	0.299705	0.28863	0.296768	0.286964	0.287976	0.2981	0.300976	0.288425	0.29791	0.294448	0.293391	0.236574	0.229731	0.233572	0.235895	0.233967	0.235467	0.233387	0.23297	0.292634	0.294497	0.25719	0.293706	0.291656	0.303157	0.305202	0.307069	0.304455	0.306634	0.228257	0.234759	0.23465	0.239035	0.239392	0.243068	0.240541	0.238978
Liangdao1_EN	Ancient_China	0.285185	0.289194	0.290427	0.293745	0.294358	0.29477	0.289917	0.285508	0.294417	0.295343	0.302586	0.300985	0.285548	0.296169	0.284358	0.285559	0.297571	0.301647	0.286309	0.298383	0.291142	0.292108	0.231774	0.22736	0.229573	0.231003	0.23019	0.231528	0.228153	0.229921	0.275972	0.277244	0.248189	0.275856	0.274373	0.296327	0.296006	0.293753	0.294299	0.295109	0.225068	0.230914	0.230558	0.233681	0.234375	0.237085	0.235503	0.234026
Liangdao2_EN	Ancient_China	0.288116	0.293848	0.292402	0.297008	0.29728	0.297491	0.292911	0.290733	0.297534	0.297444	0.304737	0.30511	0.287378	0.298508	0.287636	0.287139	0.298364	0.30437	0.288255	0.300998	0.29399	0.294309	0.233142	0.227691	0.230405	0.231639	0.230543	0.232591	0.229573	0.229946	0.278577	0.278808	0.250646	0.277393	0.277935	0.298561	0.297683	0.29612	0.296683	0.296547	0.22589	0.231076	0.231497	0.23485	0.235221	0.238826	0.235861	0.235037
Longtoushan_BA	Ancient_China	0.290961	0.296079	0.296038	0.302199	0.302046	0.302617	0.297176	0.29227	0.301127	0.302511	0.30475	0.303199	0.29002	0.298474	0.28778	0.288296	0.300878	0.303407	0.289279	0.299816	0.295593	0.295279	0.237442	0.230457	0.233526	0.23595	0.23376	0.236525	0.232876	0.233313	0.294041	0.295463	0.257174	0.29434	0.292962	0.304202	0.305159	0.306482	0.304079	0.307186	0.22877	0.235478	0.234773	0.238878	0.240544	0.24347	0.24115	0.239177
Luoheguxiang_LBIA	Ancient_China	0.292436	0.29723	0.298122	0.304679	0.304407	0.305169	0.299807	0.292992	0.302732	0.304452	0.306937	0.305176	0.291707	0.299886	0.289659	0.289823	0.301642	0.305212	0.291637	0.302391	0.296917	0.297098	0.23624	0.229489	0.233147	0.235324	0.233471	0.234909	0.231738	0.232021	0.290728	0.292753	0.255909	0.292376	0.290186	0.307019	0.30767	0.307644	0.306888	0.309481	0.227704	0.234676	0.233925	0.238304	0.239483	0.241881	0.240392	0.238822
Miaozigou_MN	Ancient_China	0.290605	0.293108	0.296694	0.303229	0.302229	0.301793	0.298401	0.291489	0.301185	0.302892	0.302403	0.302287	0.291164	0.297315	0.288871	0.288941	0.299351	0.302892	0.289348	0.2982	0.295787	0.293192	0.236864	0.230818	0.233701	0.235904	0.233682	0.236058	0.231317	0.232499	0.29357	0.295508	0.257903	0.294793	0.293227	0.305143	0.306748	0.307214	0.304316	0.307763	0.228181	0.234069	0.233878	0.238456	0.24001	0.241726	0.240293	0.23881
Mogushan_Xianbei_IA	Ancient_China	0.286222	0.292067	0.290935	0.297263	0.297271	0.297746	0.292321	0.286075	0.295597	0.297828	0.296998	0.299664	0.286596	0.29306	0.284264	0.284908	0.293234	0.296781	0.284853	0.293298	0.292685	0.290172	0.240538	0.233917	0.236696	0.23915	0.238027	0.239387	0.236884	0.236965	0.304272	0.306626	0.262216	0.304181	0.302428	0.298077	0.300781	0.301562	0.298596	0.301871	0.231707	0.238949	0.238398	0.243005	0.243453	0.248077	0.245639	0.241118
Pingliangtai_LN	Ancient_China	0.293017	0.297344	0.29906	0.304715	0.305151	0.304828	0.299748	0.294797	0.304211	0.3048	0.30684	0.305764	0.292357	0.300986	0.290377	0.290599	0.302644	0.305593	0.291266	0.302324	0.298839	0.297481	0.236825	0.229871	0.233212	0.235333	0.234264	0.236334	0.231526	0.232627	0.290956	0.293294	0.255648	0.290813	0.289799	0.306686	0.307528	0.309171	0.307052	0.310077	0.228336	0.234642	0.233993	0.237639	0.239271	0.241965	0.240368	0.238262
Qihe_EN	Ancient_China	0.277949	0.283347	0.283068	0.286218	0.287204	0.286743	0.283299	0.280247	0.287805	0.287411	0.291827	0.293618	0.277999	0.286525	0.278339	0.27885	0.290065	0.29084	0.277641	0.287507	0.28154	0.283043	0.228677	0.223804	0.226011	0.227286	0.226108	0.227952	0.225353	0.225514	0.270324	0.271059	0.243848	0.270594	0.270286	0.287904	0.287678	0.285651	0.286764	0.287241	0.221908	0.226654	0.227052	0.229694	0.231345	0.231838	0.231927	0.230642
Shimao_LN	Ancient_China	0.290195	0.294667	0.296561	0.301722	0.301784	0.302269	0.297936	0.293059	0.301205	0.301908	0.30246	0.301884	0.289637	0.296729	0.287264	0.288079	0.296942	0.301542	0.288906	0.298947	0.29549	0.294325	0.236383	0.229771	0.23299	0.23511	0.233448	0.235293	0.231692	0.231995	0.292107	0.294403	0.256462	0.292006	0.291385	0.303723	0.304746	0.306879	0.304587	0.307778	0.227441	0.234385	0.233806	0.238036	0.239233	0.24211	0.23943	0.237975
Shirenzigou_IA	Ancient_China	0.260135	0.261545	0.261625	0.263987	0.264833	0.264804	0.262303	0.258562	0.263408	0.264415	0.264853	0.263738	0.260519	0.262619	0.25842	0.25921	0.260912	0.263661	0.259349	0.263175	0.26221	0.260002	0.250462	0.247067	0.249876	0.250286	0.250505	0.249762	0.251872	0.251194	0.271395	0.271065	0.26089	0.271984	0.270872	0.265226	0.266288	0.266795	0.264515	0.26654	0.24513	0.249415	0.253421	0.254739	0.255085	0.256	0.254658	0.252184
Shirenzigou_IA_E	Ancient_China	0.27505	0.277015	0.280065	0.283481	0.283105	0.28228	0.280094	0.276458	0.280718	0.283344	0.283751	0.279303	0.273217	0.277436	0.272611	0.271767	0.278446	0.283598	0.272443	0.28107	0.278452	0.278515	0.242822	0.238748	0.241661	0.24361	0.242428	0.243192	0.240824	0.241661	0.284914	0.285512	0.259251	0.286231	0.285816	0.285627	0.287248	0.288759	0.283891	0.287401	0.23764	0.241931	0.24395	0.246135	0.247202	0.25156	0.248691	0.243393
Shirenzigou_IA_W	Ancient_China	0.247357	0.248604	0.249246	0.251069	0.250795	0.250718	0.248731	0.246785	0.249314	0.250556	0.249655	0.250424	0.248451	0.248415	0.247141	0.248029	0.248256	0.249584	0.247961	0.249571	0.248032	0.247199	0.257372	0.256196	0.25809	0.25791	0.259142	0.257677	0.262555	0.260526	0.260743	0.258721	0.262826	0.260301	0.261053	0.250868	0.250916	0.252037	0.251271	0.253162	0.25433	0.258176	0.262825	0.263625	0.263101	0.263968	0.263432	0.260277
Suogang_LN	Ancient_China	0.286622	0.287778	0.291606	0.29571	0.297395	0.296957	0.293586	0.288121	0.296813	0.299188	0.307723	0.309315	0.287105	0.3011	0.286283	0.28528	0.304376	0.308106	0.286333	0.304131	0.298127	0.296429	0.229702	0.226994	0.227562	0.230474	0.228863	0.232282	0.22486	0.228562	0.276329	0.280561	0.247525	0.275898	0.275425	0.299557	0.298496	0.296385	0.295431	0.298207	0.223179	0.229295	0.228851	0.230888	0.231435	0.234232	0.232171	0.232015
Taiwan_Gongguan	Ancient_China	0.299407	0.304955	0.303162	0.310432	0.310656	0.311144	0.305305	0.301274	0.312015	0.311732	0.326394	0.323211	0.298555	0.316894	0.297073	0.297873	0.319557	0.326281	0.302043	0.319388	0.311553	0.312865	0.236892	0.230256	0.23382	0.236041	0.234547	0.236004	0.233048	0.232496	0.288674	0.290342	0.25676	0.288478	0.286829	0.312844	0.3118	0.310684	0.311404	0.312381	0.228624	0.234891	0.234613	0.238893	0.239179	0.24277	0.241066	0.239059
Taiwan_Hanben	Ancient_China	0.297407	0.301483	0.301772	0.30797	0.308261	0.30852	0.302161	0.299783	0.308989	0.308666	0.32267	0.322716	0.296215	0.312897	0.29559	0.296142	0.315819	0.32079	0.298641	0.31516	0.307273	0.30965	0.236142	0.230144	0.232926	0.234567	0.233494	0.235195	0.231806	0.232469	0.285104	0.287054	0.254034	0.285915	0.284309	0.310079	0.308528	0.307784	0.308333	0.309046	0.227932	0.234058	0.2338	0.237544	0.238678	0.240966	0.239319	0.237651
Tanshishan_LN	Ancient_China	0.289311	0.294535	0.293817	0.299564	0.300069	0.300512	0.294206	0.291214	0.3007	0.300299	0.309992	0.308885	0.287964	0.301495	0.28864	0.288122	0.305213	0.308151	0.290157	0.3044	0.297064	0.298417	0.231116	0.22518	0.228212	0.229586	0.22892	0.230642	0.227539	0.228003	0.279526	0.279601	0.249339	0.279428	0.279018	0.302788	0.301584	0.299764	0.300235	0.300536	0.223514	0.230034	0.229426	0.23317	0.234391	0.235824	0.234836	0.232911
Wadian_LN	Ancient_China	0.292391	0.297421	0.297866	0.303354	0.303677	0.30439	0.299013	0.293382	0.302703	0.303939	0.305149	0.304038	0.291462	0.299787	0.289078	0.289926	0.299915	0.304547	0.29035	0.302268	0.29732	0.296223	0.236736	0.22939	0.23302	0.235011	0.233447	0.235325	0.231892	0.232703	0.291635	0.293548	0.256384	0.292364	0.290927	0.306234	0.306173	0.308339	0.305839	0.309315	0.22816	0.234391	0.234264	0.238118	0.239084	0.24229	0.240611	0.238396
Wanggou_MN	Ancient_China	0.289715	0.293882	0.295378	0.300758	0.301014	0.301158	0.297432	0.29198	0.299643	0.301466	0.301423	0.301499	0.288832	0.297111	0.287102	0.287621	0.298279	0.30046	0.287789	0.297464	0.294609	0.293766	0.235239	0.228898	0.232554	0.234908	0.232525	0.234036	0.230647	0.232194	0.290418	0.292093	0.255855	0.29011	0.289059	0.302986	0.304693	0.305999	0.303752	0.306512	0.227649	0.233479	0.233579	0.237642	0.238504	0.242331	0.240087	0.238212
Wuqi_EN	Ancient_China	0.282663	0.286266	0.287548	0.293231	0.292955	0.293189	0.289293	0.287529	0.2916	0.292918	0.293059	0.292917	0.28159	0.289312	0.27967	0.28059	0.290685	0.294113	0.281934	0.291955	0.286116	0.287932	0.234713	0.22553	0.231116	0.232932	0.230659	0.232378	0.228993	0.22925	0.299405	0.302953	0.256086	0.30055	0.29854	0.294836	0.29472	0.297358	0.29272	0.296375	0.225548	0.231848	0.230826	0.237015	0.237888	0.240377	0.238868	0.23581
Wuzhuangguoliang	Ancient_China	0.296292	0.300393	0.301866	0.307875	0.307273	0.307532	0.301991	0.297565	0.305996	0.307639	0.308043	0.305603	0.294752	0.301408	0.29358	0.293786	0.301177	0.305343	0.29481	0.303405	0.300788	0.301703	0.243752	0.236604	0.239767	0.242287	0.241613	0.24371	0.239625	0.240495	0.299987	0.303204	0.262962	0.301458	0.299472	0.309352	0.309341	0.314256	0.309059	0.313382	0.235916	0.241997	0.241863	0.246133	0.246913	0.250683	0.248012	0.245327
Xiaogao_EN	Ancient_China	0.285081	0.288595	0.2907	0.296255	0.297222	0.296682	0.292955	0.288112	0.295141	0.296952	0.298715	0.299134	0.285454	0.293693	0.28272	0.282878	0.295192	0.297414	0.284152	0.294945	0.290776	0.29034	0.234454	0.227245	0.230256	0.232783	0.230119	0.232006	0.230046	0.229515	0.290748	0.292199	0.254066	0.291208	0.290589	0.298493	0.299528	0.301082	0.299035	0.301632	0.225773	0.232137	0.231101	0.23516	0.235984	0.240914	0.238367	0.23509
Xiaojingshan_EN	Ancient_China	0.284574	0.288071	0.289722	0.295365	0.295361	0.295809	0.290686	0.287108	0.29382	0.29536	0.29654	0.297093	0.283733	0.290703	0.281419	0.282144	0.291163	0.29562	0.283021	0.292649	0.289059	0.287387	0.233437	0.226614	0.229537	0.232158	0.2308	0.232342	0.228141	0.229119	0.287255	0.289432	0.252742	0.287176	0.286656	0.296681	0.298617	0.299195	0.298197	0.300441	0.225542	0.230859	0.230692	0.23487	0.235836	0.239106	0.237653	0.234393
Xiaowu_MN	Ancient_China	0.290585	0.294527	0.296302	0.303061	0.302645	0.302915	0.297844	0.29209	0.30173	0.303131	0.304138	0.303265	0.290383	0.298584	0.288249	0.288562	0.301198	0.303944	0.290027	0.299864	0.29625	0.295696	0.237062	0.230333	0.233488	0.234747	0.234115	0.235928	0.232838	0.232895	0.289782	0.29212	0.256727	0.291187	0.289972	0.303866	0.305166	0.306592	0.304981	0.307366	0.2292	0.234979	0.234773	0.238777	0.23952	0.242797	0.240537	0.238815
Xitoucun_LN	Ancient_China	0.288146	0.292626	0.293215	0.298769	0.298747	0.298865	0.292117	0.289718	0.299219	0.29966	0.307055	0.306655	0.286741	0.299413	0.28674	0.286915	0.301593	0.305632	0.287872	0.302129	0.29397	0.295234	0.229266	0.224278	0.22647	0.228142	0.22737	0.228756	0.225664	0.226267	0.278024	0.280201	0.247366	0.27842	0.276684	0.30052	0.299736	0.298393	0.298875	0.29929	0.222064	0.227968	0.227682	0.231427	0.232362	0.235449	0.233326	0.231548
Yumin_EN	Ancient_China	0.282267	0.286155	0.288111	0.29183	0.291485	0.291956	0.290438	0.284886	0.289784	0.292399	0.292566	0.290217	0.280497	0.288805	0.279438	0.279702	0.287718	0.291821	0.280388	0.289107	0.285304	0.283298	0.236034	0.229129	0.232412	0.23506	0.232323	0.234142	0.230886	0.232056	0.294764	0.296542	0.257621	0.294785	0.294404	0.293951	0.295968	0.297284	0.294841	0.296757	0.22655	0.233646	0.233469	0.237765	0.240144	0.242969	0.241154	0.238233
Zhalainuoer_EN	Ancient_China	0.285724	0.29008	0.290905	0.296591	0.296614	0.296113	0.293322	0.29192	0.295553	0.298071	0.296909	0.296916	0.285432	0.293217	0.283351	0.283921	0.292174	0.298389	0.284779	0.293195	0.290681	0.29042	0.237458	0.22974	0.234454	0.23577	0.234537	0.236146	0.233427	0.232987	0.302796	0.306673	0.26018	0.302467	0.302193	0.298391	0.299342	0.300446	0.297264	0.300427	0.229123	0.235433	0.235119	0.240601	0.243222	0.246794	0.243398	0.240669
Zhalainuoer_IA	Ancient_China	0.278034	0.281719	0.282902	0.288581	0.288081	0.288977	0.285621	0.278791	0.285904	0.288748	0.286842	0.288326	0.27743	0.28479	0.278164	0.277351	0.28318	0.287643	0.279062	0.286138	0.280936	0.281151	0.237796	0.231127	0.233414	0.238492	0.23515	0.238895	0.234755	0.235186	0.292922	0.294052	0.257755	0.293772	0.294427	0.289098	0.289526	0.290267	0.29015	0.291567	0.228055	0.234556	0.235784	0.238591	0.241396	0.249171	0.245477	0.239308
Japan_Jomon	Ancient_Japan	0.277258	0.280699	0.280359	0.28265	0.283371	0.283007	0.280708	0.280728	0.282195	0.283581	0.287574	0.287057	0.276037	0.283021	0.275462	0.276293	0.285732	0.285883	0.276055	0.283609	0.280094	0.279942	0.235144	0.229851	0.232655	0.2339	0.232969	0.234148	0.231242	0.232034	0.275833	0.278292	0.249936	0.275888	0.274949	0.284521	0.284245	0.284416	0.28338	0.284327	0.228787	0.233922	0.234271	0.237204	0.237296	0.239701	0.238563	0.237472
Khovsgol_LBA	Ancient_Mongolia	0.274975	0.278341	0.278908	0.282505	0.282658	0.282787	0.279938	0.275564	0.281386	0.282964	0.283464	0.282995	0.274567	0.279745	0.272822	0.273552	0.280109	0.283109	0.274053	0.280775	0.278325	0.277529	0.243556	0.237255	0.240991	0.242584	0.241411	0.2426	0.241435	0.242032	0.293413	0.294944	0.263337	0.294195	0.293035	0.283975	0.285365	0.286456	0.284099	0.286644	0.235251	0.24174	0.243918	0.247696	0.248078	0.251509	0.249741	0.246446
Mongolia_BA_1	Ancient_Mongolia	0.277809	0.281024	0.281894	0.285149	0.285895	0.28654	0.283663	0.277309	0.284743	0.285622	0.285945	0.285224	0.277629	0.28187	0.275477	0.276598	0.28223	0.285509	0.276063	0.2833	0.280828	0.279164	0.244026	0.238113	0.241829	0.243568	0.242588	0.242633	0.242729	0.243734	0.29581	0.297674	0.264974	0.296447	0.294027	0.286709	0.288487	0.288818	0.287676	0.289887	0.237207	0.242794	0.245244	0.248681	0.250063	0.252629	0.251429	0.247401
Mongolia_BA_2	Ancient_Mongolia	0.274105	0.277792	0.277913	0.281377	0.280968	0.282195	0.278105	0.274871	0.278746	0.281453	0.280908	0.280767	0.27356	0.277565	0.271643	0.272461	0.278327	0.280667	0.272341	0.279247	0.27754	0.275188	0.246899	0.240929	0.243805	0.245789	0.244205	0.246825	0.245335	0.245105	0.292882	0.294209	0.266419	0.294369	0.294027	0.282131	0.283144	0.284352	0.281433	0.284929	0.238526	0.245152	0.248185	0.251213	0.252696	0.255542	0.252837	0.249513
Mongolia_Chalcolithic_1_Afanasievo	Ancient_Mongolia	0.236338	0.235499	0.234732	0.236292	0.236743	0.236591	0.234753	0.23365	0.234654	0.236851	0.235799	0.236541	0.237048	0.234943	0.236009	0.236103	0.233718	0.23668	0.237412	0.235897	0.237277	0.234615	0.265721	0.266374	0.2671	0.266798	0.268816	0.26683	0.273661	0.27295	0.250259	0.249078	0.26746	0.250016	0.250612	0.236486	0.236291	0.236503	0.236517	0.236991	0.262922	0.266106	0.274083	0.272746	0.272818	0.272431	0.273136	0.266791
Mongolia_Chalcolithic_2_Afanasievo	Ancient_Mongolia	0.281689	0.285774	0.286004	0.28925	0.290183	0.290665	0.285936	0.28615	0.288453	0.29031	0.290255	0.290582	0.280703	0.286711	0.279012	0.279635	0.287314	0.290598	0.279866	0.28716	0.285112	0.283997	0.240912	0.234403	0.237832	0.240102	0.237809	0.240344	0.237591	0.237675	0.300417	0.301965	0.263353	0.300309	0.299064	0.291818	0.293696	0.294955	0.291839	0.295039	0.232586	0.238682	0.240187	0.243996	0.245257	0.248881	0.246127	0.243607
Mongolia_EBA_1_Ulgii	Ancient_Mongolia	0.275376	0.278216	0.279313	0.282646	0.282644	0.282757	0.280396	0.275713	0.28123	0.282791	0.28293	0.283191	0.274622	0.279822	0.272823	0.273655	0.279287	0.282073	0.273948	0.280712	0.277684	0.276584	0.243344	0.237217	0.240588	0.242387	0.241709	0.24253	0.241042	0.241816	0.292399	0.293919	0.262506	0.293177	0.291893	0.283676	0.28584	0.286342	0.283885	0.28623	0.235104	0.241402	0.243236	0.247013	0.247477	0.25033	0.248778	0.246363
Mongolia_EBA_2_Chemurchek	Ancient_Mongolia	0.243725	0.243685	0.243887	0.245093	0.24541	0.24525	0.244016	0.242176	0.243731	0.245131	0.245658	0.245235	0.244178	0.244415	0.243438	0.244294	0.243209	0.245418	0.244141	0.244804	0.245208	0.243447	0.259324	0.25742	0.258774	0.25947	0.260477	0.259324	0.264393	0.263731	0.260558	0.257721	0.265772	0.260893	0.261886	0.244899	0.245784	0.245518	0.244876	0.24656	0.254778	0.258736	0.265603	0.265965	0.265421	0.266271	0.265765	0.262568
Mongolia_EIA_1_SlabGrave	Ancient_Mongolia	0.283869	0.28753	0.288387	0.293172	0.293273	0.293286	0.290163	0.285469	0.291966	0.293597	0.294177	0.293754	0.283095	0.289865	0.281027	0.281621	0.289999	0.29358	0.28232	0.290956	0.287517	0.286352	0.239954	0.232735	0.236556	0.238493	0.236951	0.239071	0.23575	0.236501	0.299664	0.301914	0.261328	0.299848	0.298127	0.29481	0.296507	0.297952	0.2949	0.29767	0.23124	0.237597	0.238193	0.24273	0.243972	0.247196	0.245247	0.242113
Mongolia_EIA_2	Ancient_Mongolia	0.25318	0.253944	0.253847	0.257257	0.256541	0.256807	0.254822	0.251974	0.254737	0.256066	0.256064	0.255383	0.253605	0.254468	0.251311	0.252394	0.252293	0.256627	0.253061	0.255877	0.254673	0.252315	0.25787	0.255131	0.256973	0.257766	0.257821	0.257717	0.259567	0.258581	0.266633	0.266547	0.265918	0.267627	0.265778	0.25666	0.25746	0.257385	0.256015	0.257898	0.252105	0.257441	0.263175	0.264233	0.263432	0.26482	0.264626	0.258494
Mongolia_EIA_3	Ancient_Mongolia	0.2799	0.28263	0.284431	0.28909	0.289129	0.289988	0.285162	0.280768	0.287717	0.289101	0.290495	0.288767	0.278745	0.285641	0.277298	0.27723	0.28692	0.289492	0.278831	0.286244	0.284347	0.282754	0.240008	0.234588	0.23723	0.23888	0.238104	0.240241	0.236793	0.236824	0.297313	0.2996	0.261043	0.298649	0.295787	0.289744	0.29169	0.293493	0.290429	0.293296	0.231716	0.238473	0.239466	0.243567	0.24468	0.248277	0.246518	0.243348
Mongolia_EIA_4_Sagly	Ancient_Mongolia	0.254437	0.255779	0.255589	0.258215	0.258691	0.258584	0.256334	0.253953	0.256758	0.258562	0.258712	0.258492	0.254819	0.256745	0.25339	0.253697	0.256887	0.258108	0.25433	0.257428	0.256335	0.254726	0.254205	0.251053	0.253368	0.253843	0.25388	0.253851	0.255438	0.255358	0.269225	0.268674	0.263657	0.269958	0.268885	0.258827	0.259662	0.260359	0.258714	0.260358	0.248479	0.253298	0.258398	0.259562	0.259954	0.26069	0.26072	0.255409
Mongolia_EIA_5	Ancient_Mongolia	0.255176	0.256596	0.256714	0.260133	0.259279	0.2592	0.257016	0.254124	0.257905	0.259635	0.259529	0.259077	0.255868	0.2563	0.253134	0.254155	0.256213	0.259469	0.255341	0.257927	0.255179	0.25546	0.25339	0.249493	0.252504	0.252692	0.253574	0.25329	0.254526	0.25474	0.267281	0.268104	0.261259	0.267266	0.266268	0.259552	0.261354	0.260839	0.260079	0.261519	0.247529	0.252924	0.257017	0.258028	0.258029	0.258927	0.258725	0.25458
Mongolia_EIA_6_Pazyryk	Ancient_Mongolia	0.25215	0.253237	0.252277	0.255399	0.25564	0.255655	0.252882	0.250558	0.253446	0.255356	0.255296	0.255366	0.252265	0.253352	0.250829	0.251216	0.253546	0.255708	0.252294	0.254156	0.252702	0.252541	0.258481	0.256636	0.257645	0.25883	0.259079	0.258332	0.258964	0.259983	0.267254	0.266329	0.265716	0.267404	0.268226	0.255603	0.257268	0.256721	0.255838	0.257706	0.253621	0.25853	0.264006	0.264346	0.265082	0.266262	0.265908	0.259768
Mongolia_EIA_7_Xiongnu	Ancient_Mongolia	0.282063	0.287562	0.286053	0.291873	0.291554	0.291362	0.288068	0.28526	0.291086	0.291759	0.291757	0.291926	0.282388	0.28747	0.280047	0.280868	0.287681	0.290613	0.280275	0.289168	0.286426	0.284456	0.241993	0.234905	0.239021	0.240457	0.239471	0.242015	0.238045	0.238103	0.29468	0.297444	0.262098	0.294151	0.293306	0.292792	0.29359	0.295133	0.292344	0.295367	0.233566	0.240536	0.240864	0.245185	0.246704	0.248879	0.247378	0.242825
Mongolia_EIA_8	Ancient_Mongolia	0.28782	0.290317	0.292196	0.297812	0.297555	0.296974	0.295046	0.290069	0.295389	0.297059	0.298032	0.297536	0.286589	0.293437	0.284326	0.284575	0.294928	0.296556	0.285212	0.295114	0.290664	0.289418	0.241265	0.234124	0.237799	0.239894	0.239147	0.239804	0.237511	0.237731	0.303447	0.305943	0.263187	0.303448	0.303385	0.298009	0.300274	0.302586	0.298517	0.302179	0.232326	0.239041	0.239117	0.244343	0.245018	0.249993	0.246575	0.243987
Mongolia_IA_Xianbei	Ancient_Mongolia	0.280553	0.284141	0.284847	0.28942	0.289906	0.289692	0.286624	0.28291	0.288891	0.289763	0.29027	0.289827	0.279655	0.286295	0.27858	0.278012	0.284666	0.28983	0.279273	0.288095	0.284178	0.283206	0.24202	0.235308	0.238699	0.239976	0.239865	0.240733	0.238087	0.238028	0.294646	0.296719	0.261057	0.294163	0.29398	0.291988	0.29353	0.294149	0.291871	0.294329	0.233874	0.239453	0.240606	0.244642	0.244431	0.247064	0.246598	0.243622
Mongolia_LBA_1_MongunTaiga	Ancient_Mongolia	0.269679	0.273709	0.27369	0.277784	0.277426	0.277306	0.275188	0.271336	0.276111	0.27698	0.27849	0.278793	0.269835	0.275732	0.268875	0.269379	0.275761	0.278215	0.269795	0.276097	0.273104	0.272174	0.243145	0.237465	0.241026	0.242029	0.242146	0.242816	0.243142	0.243439	0.290429	0.291165	0.262258	0.291843	0.290879	0.278172	0.279656	0.281208	0.276809	0.280898	0.235435	0.242127	0.244679	0.247814	0.249749	0.252022	0.250685	0.247547
Mongolia_LBA_2_Ulaanzukh	Ancient_Mongolia	0.285083	0.288468	0.289804	0.294647	0.294503	0.294646	0.292161	0.287043	0.293055	0.295123	0.296206	0.295309	0.28417	0.290716	0.282093	0.282734	0.291742	0.294565	0.283219	0.292278	0.288976	0.287915	0.237348	0.229877	0.233762	0.236358	0.234279	0.235973	0.233221	0.233109	0.297907	0.301112	0.258441	0.297735	0.296314	0.296283	0.297982	0.29953	0.297263	0.299537	0.2284	0.234899	0.234991	0.239644	0.240201	0.244701	0.241387	0.239047
Mongolia_LBA_3_MongunTaiga	Ancient_Mongolia	0.254457	0.255696	0.255215	0.257652	0.258214	0.25814	0.256411	0.254429	0.256735	0.258224	0.258304	0.257865	0.254524	0.256858	0.253008	0.253895	0.256154	0.257644	0.254198	0.257125	0.255635	0.254164	0.254777	0.251257	0.253865	0.254154	0.254911	0.253981	0.255405	0.256146	0.265194	0.264734	0.262472	0.26526	0.26481	0.258887	0.258974	0.259224	0.25826	0.259587	0.248632	0.253791	0.25906	0.260081	0.260534	0.260558	0.260769	0.255119
Mongolia_LBA_4_CenterWest	Ancient_Mongolia	0.276722	0.279718	0.280496	0.28451	0.284723	0.284692	0.281758	0.27776	0.28321	0.284622	0.285583	0.28476	0.2762	0.28191	0.274566	0.275134	0.281649	0.285107	0.275588	0.28303	0.280153	0.278373	0.243533	0.237437	0.240871	0.242497	0.24152	0.242916	0.241465	0.241886	0.294348	0.295805	0.263617	0.295137	0.293819	0.286048	0.287056	0.288325	0.285945	0.288324	0.235571	0.241772	0.24398	0.247824	0.248901	0.25164	0.249821	0.246473
Mongolia_LBA_5_CenterWest	Ancient_Mongolia	0.251198	0.251926	0.251583	0.255018	0.255079	0.254551	0.252736	0.251371	0.252686	0.254894	0.25549	0.254605	0.251293	0.252838	0.250277	0.250358	0.251352	0.254458	0.250679	0.253749	0.252977	0.251365	0.255326	0.253816	0.255316	0.255102	0.256018	0.254954	0.25639	0.257666	0.264109	0.264183	0.262964	0.264547	0.263496	0.254774	0.255991	0.256491	0.255695	0.256667	0.251186	0.254994	0.26102	0.26177	0.261748	0.262875	0.261781	0.256338
Mongolia_MBA_1_Munkhkhairkhan	Ancient_Mongolia	0.273747	0.27568	0.276668	0.28017	0.280802	0.280615	0.278544	0.272445	0.279562	0.281432	0.281696	0.280484	0.273554	0.279112	0.271623	0.272086	0.277533	0.280964	0.273395	0.279693	0.277431	0.27489	0.244976	0.238928	0.242779	0.244136	0.242918	0.243742	0.244183	0.244133	0.294288	0.295636	0.265353	0.295259	0.294755	0.281823	0.283651	0.283845	0.281859	0.284685	0.237372	0.24321	0.245915	0.249611	0.250198	0.253853	0.252689	0.248902
Mongolia_MBA_2_Munkhkhairkhan	Ancient_Mongolia	0.265938	0.267619	0.267378	0.270765	0.271313	0.271137	0.269833	0.265238	0.269114	0.271353	0.271354	0.271986	0.265136	0.268735	0.264091	0.265348	0.268376	0.271785	0.265371	0.269867	0.268576	0.267011	0.252141	0.246745	0.249633	0.250789	0.249757	0.250799	0.252254	0.252181	0.280875	0.281932	0.265496	0.282063	0.282194	0.272031	0.273021	0.272793	0.272873	0.273638	0.24409	0.249926	0.253251	0.255561	0.25569	0.258659	0.256439	0.254922
Mongolia_Medieval	Ancient_Mongolia	0.277017	0.280286	0.28121	0.284905	0.284301	0.284739	0.281207	0.279294	0.28463	0.284716	0.284885	0.284813	0.276412	0.281491	0.274832	0.276607	0.281132	0.285808	0.275655	0.28382	0.280136	0.279945	0.243259	0.237403	0.24109	0.242644	0.24122	0.242239	0.240419	0.241254	0.290667	0.292611	0.261391	0.29133	0.289839	0.28619	0.287799	0.287865	0.285754	0.288331	0.235424	0.24194	0.242966	0.246662	0.247305	0.251946	0.250037	0.244925
Mongolia_Mongol	Ancient_Mongolia	0.27448	0.277503	0.278284	0.281575	0.28208	0.282472	0.280074	0.276542	0.281152	0.282502	0.28234	0.282057	0.274693	0.279074	0.272377	0.272773	0.279036	0.282624	0.273363	0.279711	0.277583	0.276671	0.244913	0.240366	0.243123	0.243478	0.243014	0.244498	0.242529	0.242831	0.284328	0.284892	0.260412	0.285487	0.283591	0.283819	0.284229	0.284873	0.283196	0.285576	0.238392	0.243843	0.245084	0.248378	0.249332	0.252163	0.251907	0.246928
Mongolia_N_East	Ancient_Mongolia	0.284786	0.288983	0.289724	0.294179	0.294528	0.294997	0.291232	0.286478	0.293014	0.294136	0.29553	0.294252	0.283636	0.291083	0.281792	0.281605	0.291728	0.29531	0.282839	0.291625	0.288802	0.288812	0.236169	0.229306	0.233008	0.234948	0.233569	0.235535	0.231121	0.232074	0.30084	0.303275	0.259545	0.299562	0.299223	0.296335	0.29759	0.298746	0.29699	0.299342	0.227543	0.23435	0.234241	0.238507	0.239891	0.243963	0.240989	0.238482
Mongolia_N_North	Ancient_Mongolia	0.282743	0.286725	0.287423	0.291717	0.292237	0.292344	0.289396	0.284933	0.291144	0.292571	0.293434	0.292061	0.281467	0.288461	0.280186	0.28082	0.288953	0.292623	0.281164	0.289926	0.28655	0.285992	0.236514	0.229463	0.23317	0.235439	0.233381	0.23632	0.232387	0.232835	0.299886	0.302692	0.258832	0.299227	0.298308	0.293714	0.295444	0.297003	0.294111	0.296356	0.227782	0.234362	0.234428	0.239307	0.240091	0.244786	0.242674	0.238306
XiongNu	Ancient_Mongolia	0.289747	0.294348	0.29522	0.300803	0.301483	0.301115	0.296745	0.291964	0.300515	0.301619	0.302887	0.301799	0.289058	0.297476	0.28724	0.287523	0.299097	0.302925	0.288763	0.298926	0.295383	0.2938	0.238305	0.231818	0.235169	0.236801	0.235579	0.237441	0.233928	0.23479	0.291269	0.292593	0.257811	0.291547	0.290958	0.302908	0.303913	0.305082	0.303073	0.306006	0.230031	0.236524	0.236379	0.240005	0.241882	0.244181	0.242469	0.240046
XiongNu_WE	Ancient_Mongolia	0.254677	0.257415	0.255846	0.259161	0.259645	0.258987	0.256823	0.255455	0.2571	0.259681	0.260089	0.260156	0.255398	0.256888	0.253469	0.253655	0.258749	0.258894	0.255022	0.257523	0.257075	0.254664	0.250325	0.247241	0.249544	0.249461	0.24986	0.250065	0.251891	0.251389	0.267732	0.268001	0.260771	0.268219	0.267881	0.259594	0.260725	0.261135	0.260024	0.261125	0.245888	0.249267	0.253451	0.254666	0.255416	0.255384	0.255564	0.252168
Nepal_Chokhopani_2700BP	Ancient_Nepal	0.286031	0.290355	0.291783	0.295458	0.295329	0.295734	0.292441	0.289316	0.294551	0.296061	0.295648	0.295694	0.285318	0.291287	0.284874	0.284903	0.291614	0.294424	0.285218	0.293212	0.289475	0.287545	0.236465	0.230123	0.233416	0.234762	0.23382	0.235701	0.232883	0.231626	0.286686	0.288804	0.255734	0.286015	0.285226	0.296808	0.298848	0.300173	0.297902	0.300351	0.229731	0.234247	0.233699	0.237735	0.238209	0.241842	0.238795	0.239229
Nepal_Mebrak_2125BP	Ancient_Nepal	0.284406	0.28906	0.290275	0.292938	0.294037	0.294794	0.292784	0.28648	0.293025	0.294586	0.294468	0.295035	0.283692	0.290177	0.28269	0.282836	0.290559	0.293855	0.283651	0.291982	0.288911	0.287478	0.235628	0.229436	0.232588	0.234391	0.232152	0.233826	0.232099	0.231642	0.286985	0.288521	0.254636	0.287023	0.286124	0.296368	0.298756	0.299482	0.297395	0.299499	0.227828	0.233414	0.233751	0.237268	0.238813	0.24148	0.239475	0.238328
Nepal_Samdzong_1500BP	Ancient_Nepal	0.284218	0.289079	0.289892	0.293419	0.293751	0.2938	0.291608	0.286011	0.292366	0.294172	0.294066	0.292617	0.282993	0.289945	0.282063	0.282853	0.291233	0.293531	0.283229	0.291366	0.287804	0.286419	0.236944	0.231161	0.234367	0.235898	0.234772	0.236357	0.232963	0.234178	0.286257	0.287597	0.25533	0.286427	0.28526	0.295032	0.297016	0.298546	0.295285	0.298623	0.229524	0.235457	0.235463	0.239195	0.240427	0.243132	0.241783	0.239573
[truncated: 241 more columns]

## Sheet: Table S4
Table S4. Admxiture-f3-statistics of the form f3(Source population1, Source population2; Shigatse Tibetan) showed the admixture signals for high-altitude adaptive Shigatse Tibetan
Source1	Source2	Target	f_3	std.err	Z	SNPs
Qiang_Danba	Nepal_Samdzong_1500BP	Tibetan_Shigatse	-0.000998	0.000467	-2.135	393809
Qiang_Daofu	Nepal_Samdzong_1500BP	Tibetan_Shigatse	-0.000903	0.000443	-2.04	396802
Mongolia_EIA_7_Xiongnu	Nepal_Samdzong_1500BP	Tibetan_Shigatse	-0.002046	0.001108	-1.847	280394
Tibetan_Yajiang	Nepal_Samdzong_1500BP	Tibetan_Shigatse	-0.00079	0.00048	-1.647	395132
PaThen	Nepal_Samdzong_1500BP	Tibetan_Shigatse	-0.000915	0.000588	-1.556	392229
Mongolia_EIA_7_Xiongnu	Nepal_Mebrak_2125BP	Tibetan_Shigatse	-0.002496	0.00173	-1.443	194986
Tibetan_Shannan	Banlashan_MN	Tibetan_Shigatse	-0.000793	0.000579	-1.371	389897
Haojiatai_LBIA	Nepal_Samdzong_1500BP	Tibetan_Shigatse	-0.001485	0.001085	-1.369	298738
Tibetan_Shannan	Chuanyun_H	Tibetan_Shigatse	-0.000959	0.000733	-1.308	126799
Tibetan_Nagqu	Nepal_Samdzong_1500BP	Tibetan_Shigatse	-0.000624	0.000483	-1.293	392490
Tibetan_Xunhua	Nepal_Mebrak_2125BP	Tibetan_Shigatse	-0.001192	0.000941	-1.267	264759
Miaozigou_MN	Nepal_Mebrak_2125BP	Tibetan_Shigatse	-0.002981	0.002369	-1.258	70628
Banlashan_MN	Nepal_Mebrak_2125BP	Tibetan_Shigatse	-0.001745	0.001392	-1.254	256910
Chuanyun_H	Nepal_Mebrak_2125BP	Tibetan_Shigatse	-0.002644	0.002214	-1.194	85219
Qiang_Daofu	Nepal_Mebrak_2125BP	Tibetan_Shigatse	-0.000765	0.000671	-1.141	271968
Chuanyun_H	Nepal_Chokhopani_2700BP	Tibetan_Shigatse	-0.002317	0.002058	-1.126	120858
Mongolia_LBA_1_MongunTaiga	Nepal_Mebrak_2125BP	Tibetan_Shigatse	-0.002104	0.002004	-1.049	127808
Han_Fujian	Nepal_Samdzong_1500BP	Tibetan_Shigatse	-0.000625	0.0006	-1.042	388818
Tibetan_Shannan	Russia_UstIda_LN	Tibetan_Shigatse	-0.000546	0.000532	-1.025	359947
Daur_HGDP	Nepal_Samdzong_1500BP	Tibetan_Shigatse	-0.000508	0.000524	-0.969	398698
Tibetan_Shannan	Wadian_LN	Tibetan_Shigatse	-0.000484	0.000501	-0.966	389845
Dong_Hunan	Nepal_Samdzong_1500BP	Tibetan_Shigatse	-0.00053	0.000557	-0.951	392593
Miaozigou_MN	Shirenzigou_IA_W	Tibetan_Shigatse	-0.00292	0.003101	-0.942	32810
Tibetan_Lhasa	Zhalainuoer_IA	Tibetan_Shigatse	-0.001241	0.001381	-0.899	21487
Tatar_Zabolotniye	Nepal_Mebrak_2125BP	Tibetan_Shigatse	-0.000892	0.001023	-0.872	276202
Tibetan_Chamdo	Nepal_Samdzong_1500BP	Tibetan_Shigatse	-0.000361	0.00044	-0.822	396124
Tibetan_Lhasa	XiongNu_WE	Tibetan_Shigatse	-0.000497	0.000608	-0.817	360473
Oroqen_HGDP	Nepal_Samdzong_1500BP	Tibetan_Shigatse	-0.000441	0.000546	-0.807	397541
Tibetan_Xinlong	Nepal_Mebrak_2125BP	Tibetan_Shigatse	-0.00058	0.000722	-0.804	272241
Buryat_Bohansky	Nepal_Mebrak_2125BP	Tibetan_Shigatse	-0.000706	0.000918	-0.77	268210
Bianbian_EN	Nepal_Samdzong_1500BP	Tibetan_Shigatse	-0.000859	0.00113	-0.76	255345
Zhalainuoer_EN	Nepal_Mebrak_2125BP	Tibetan_Shigatse	-0.002131	0.002833	-0.752	47229
Mongolia_LBA_1_MongunTaiga	Nepal_Chokhopani_2700BP	Tibetan_Shigatse	-0.001408	0.001947	-0.723	179122
Russia_EBA_Yamnaya_Kalmykia	Jinchankou_LN	Tibetan_Shigatse	-0.00099	0.001401	-0.706	268144
Japanese_HGDP	Nepal_Samdzong_1500BP	Tibetan_Shigatse	-0.000326	0.000469	-0.696	408072
Tibetan_Shannan	Luoheguxiang_LBIA	Tibetan_Shigatse	-0.000366	0.000528	-0.693	360132
Mongolia_EIA_8	Nepal_Samdzong_1500BP	Tibetan_Shigatse	-0.000741	0.001074	-0.69	283508
Yi_HGDP	Nepal_Samdzong_1500BP	Tibetan_Shigatse	-0.000328	0.000481	-0.682	395775
Tibetan_Shannan	Mongolia_EIA_8	Tibetan_Shigatse	-0.000483	0.000714	-0.675	293941
Wadian_LN	Nepal_Samdzong_1500BP	Tibetan_Shigatse	-0.000518	0.000812	-0.638	376732
Tibetan_Lhasa	Chuanyun_H	Tibetan_Shigatse	-0.000476	0.000756	-0.63	126858
Zhalainuoer_EN	Nepal_Chokhopani_2700BP	Tibetan_Shigatse	-0.001629	0.002597	-0.628	67365
Mongolia_EIA_8	Nepal_Mebrak_2125BP	Tibetan_Shigatse	-0.001031	0.001773	-0.581	196909
Russia_EBA_Yamnaya_Kalmykia	Miaozigou_MN	Tibetan_Shigatse	-0.000989	0.001707	-0.579	102979
Tibetan_Nagqu	Nepal_Mebrak_2125BP	Tibetan_Shigatse	-0.00042	0.000738	-0.569	268786
XiongNu	Nepal_Samdzong_1500BP	Tibetan_Shigatse	-0.0004	0.000704	-0.567	381761
Jinchankou_LN	Mongolia_Chalcolithic_1_Afanasievo	Tibetan_Shigatse	-0.001048	0.001855	-0.565	206414
LoLo	Nepal_Samdzong_1500BP	Tibetan_Shigatse	-0.000318	0.000575	-0.552	393062
Chuvash	Nepal_Mebrak_2125BP	Tibetan_Shigatse	-0.000528	0.000984	-0.536	295054
Gelao_Longlin	Nepal_Samdzong_1500BP	Tibetan_Shigatse	-0.000284	0.000536	-0.531	396646
Han_Jiangsu	Nepal_Samdzong_1500BP	Tibetan_Shigatse	-0.000284	0.000546	-0.521	391669
Mongolia_N_East	Nepal_Samdzong_1500BP	Tibetan_Shigatse	-0.000447	0.000865	-0.517	338612
Tibetan_Xinlong	Nepal_Samdzong_1500BP	Tibetan_Shigatse	-0.000242	0.000477	-0.507	397482
Dong_Guizhou	Nepal_Samdzong_1500BP	Tibetan_Shigatse	-0.000257	0.00051	-0.505	401299
Xiaogao_EN	Nepal_Mebrak_2125BP	Tibetan_Shigatse	-0.000841	0.001679	-0.501	224415
Russia_Caucasus_EBA_Yamnaya	Miaozigou_MN	Tibetan_Shigatse	-0.000971	0.001944	-0.5	81336
Mongolia_LBA_2_Ulaanzukh	Nepal_Samdzong_1500BP	Tibetan_Shigatse	-0.000367	0.000737	-0.498	339636
Atayal	Nepal_Samdzong_1500BP	Tibetan_Shigatse	-0.000315	0.000675	-0.466	390334
Buryat_Ehirit	Nepal_Mebrak_2125BP	Tibetan_Shigatse	-0.000399	0.000868	-0.46	272663
Tibetan_Yajiang	Nepal_Mebrak_2125BP	Tibetan_Shigatse	-0.000325	0.000721	-0.451	270419
Tibetan_Shannan	Tanshishan_LN	Tibetan_Shigatse	-0.000298	0.000676	-0.442	159873
Mongolia_Chalcolithic_2_Afanasievo	Nepal_Mebrak_2125BP	Tibetan_Shigatse	-0.000806	0.001828	-0.441	190295
Russia_Lokomotiv_Eneolithic	Nepal_Mebrak_2125BP	Tibetan_Shigatse	-0.000561	0.001347	-0.417	228226
Xiaowu_MN	Nepal_Samdzong_1500BP	Tibetan_Shigatse	-0.000416	0.001042	-0.399	371153
Mongolia_MBA_2_Munkhkhairkhan	Nepal_Mebrak_2125BP	Tibetan_Shigatse	-0.000705	0.001777	-0.397	205691
Mongolia_Chalcolithic_1_Afanasievo	Nepal_Mebrak_2125BP	Tibetan_Shigatse	-0.000661	0.001705	-0.388	201606
Miaozigou_MN	Nepal_Samdzong_1500BP	Tibetan_Shigatse	-0.000532	0.001414	-0.376	102303
Kubachinian	Miaozigou_MN	Tibetan_Shigatse	-0.000494	0.001334	-0.37	112120
Han_Zhejiang	Nepal_Samdzong_1500BP	Tibetan_Shigatse	-0.00022	0.000595	-0.37	387970
XiongNu_WE	Nepal_Mebrak_2125BP	Tibetan_Shigatse	-0.00052	0.001453	-0.358	238090
Sherpa_Nepal	Zhalainuoer_IA	Tibetan_Shigatse	-0.000672	0.0019	-0.354	20933
Jinchankou_LN	Shirenzigou_IA_E	Tibetan_Shigatse	-0.001294	0.003763	-0.344	26634
Ulchi	Nepal_Samdzong_1500BP	Tibetan_Shigatse	-0.000183	0.000533	-0.343	406937
Chuanyun_H	Nepal_Samdzong_1500BP	Tibetan_Shigatse	-0.000462	0.001371	-0.337	122398
Hmong	Nepal_Samdzong_1500BP	Tibetan_Shigatse	-0.000182	0.000541	-0.337	399146
Mlabri	Nepal_Samdzong_1500BP	Tibetan_Shigatse	-0.000274	0.000815	-0.336	379165
PaThen	Tibetan_Shannan	Tibetan_Shigatse	-0.000129	0.000387	-0.333	398506
Russia_Late_Sarmatian	Jinchankou_LN	Tibetan_Shigatse	-0.000423	0.001358	-0.311	264997
Baoan_Jishishan	Nepal_Samdzong_1500BP	Tibetan_Shigatse	-0.00015	0.000491	-0.305	403586
Tibetan_Shannan	XiongNu_WE	Tibetan_Shigatse	-0.00019	0.000626	-0.304	360308
Mongol_Zasagt	Nepal_Samdzong_1500BP	Tibetan_Shigatse	-0.00016	0.00053	-0.302	401129
Mongolia_LBA_2_Ulaanzukh	Nepal_Mebrak_2125BP	Tibetan_Shigatse	-0.00034	0.001135	-0.3	234750
Tibetan_Shannan	Mongolia_LBA_2_Ulaanzukh	Tibetan_Shigatse	-0.000142	0.000477	-0.297	350464
Ingushian	Jinchankou_LN	Tibetan_Shigatse	-0.00033	0.001134	-0.291	302169
Mongolia_EIA_6_Pazyryk	Nepal_Mebrak_2125BP	Tibetan_Shigatse	-0.000517	0.001782	-0.29	199092
Liangdao1_EN	Zhalainuoer_IA	Tibetan_Shigatse	-0.001735	0.006175	-0.281	9492
Tibetan_Lhasa	Shirenzigou_IA_E	Tibetan_Shigatse	-0.000308	0.001101	-0.28	38998
Kinh_Vietnam	Nepal_Samdzong_1500BP	Tibetan_Shigatse	-0.000146	0.000531	-0.276	399707
Xibo_HGDP	Nepal_Samdzong_1500BP	Tibetan_Shigatse	-0.000149	0.000548	-0.272	395038
Sila	Tibetan_Shannan	Tibetan_Shigatse	-0.000107	0.000394	-0.271	398067
Tibetan_Gangcha	Nepal_Mebrak_2125BP	Tibetan_Shigatse	-0.000168	0.000622	-0.269	281862
Koryak	Nepal_Samdzong_1500BP	Tibetan_Shigatse	-0.000176	0.000673	-0.261	393446
Shimao_LN	Nepal_Mebrak_2125BP	Tibetan_Shigatse	-0.000344	0.001345	-0.256	255898
Russia_Andronovo	Nepal_Mebrak_2125BP	Tibetan_Shigatse	-0.000344	0.001364	-0.252	268738
Dai_HGDP	Nepal_Samdzong_1500BP	Tibetan_Shigatse	-0.000131	0.000532	-0.246	397729
Cham	Nepal_Samdzong_1500BP	Tibetan_Shigatse	-0.000125	0.000531	-0.236	406244
Russia_IA	Nepal_Mebrak_2125BP	Tibetan_Shigatse	-0.000254	0.00109	-0.233	266953
Miaozigou_MN	Mongolia_EBA_2_Chemurchek	Tibetan_Shigatse	-0.000454	0.001954	-0.232	91143
Bashkir_north	Nepal_Mebrak_2125BP	Tibetan_Shigatse	-0.000215	0.000934	-0.23	298624
Shor_Mountain	Nepal_Mebrak_2125BP	Tibetan_Shigatse	-0.000213	0.000941	-0.227	275741
Yakut_HGDP	Nepal_Samdzong_1500BP	Tibetan_Shigatse	-0.000115	0.00052	-0.221	414046
Tibetan_Shannan	Haojiatai_LBIA	Tibetan_Shigatse	-0.00016	0.000729	-0.22	309858
Han_Shanghai	Nepal_Mebrak_2125BP	Tibetan_Shigatse	-0.000247	0.001149	-0.215	259953
Han_Fujian	Tibetan_Shannan	Tibetan_Shigatse	-8.3e-05	0.000397	-0.209	396794
Sherpa_Nepal	XiongNu_WE	Tibetan_Shigatse	-0.000159	0.000784	-0.203	352627
Tibetan_Xunhua	Nepal_Samdzong_1500BP	Tibetan_Shigatse	-0.000128	0.000649	-0.198	387438
Haojiatai_LBIA	Nepal_Mebrak_2125BP	Tibetan_Shigatse	-0.000328	0.001832	-0.179	205919
Mongolia_Medieval	Nepal_Samdzong_1500BP	Tibetan_Shigatse	-0.000214	0.001229	-0.174	191405
Longtoushan_BA	Nepal_Samdzong_1500BP	Tibetan_Shigatse	-0.000178	0.001023	-0.174	212905
Naxi_HGDP	Nepal_Samdzong_1500BP	Tibetan_Shigatse	-8e-05	0.00049	-0.162	394242
Khamnegan	Nepal_Mebrak_2125BP	Tibetan_Shigatse	-0.000125	0.000797	-0.157	274463
Buryat_Zakamensky	Nepal_Samdzong_1500BP	Tibetan_Shigatse	-8.7e-05	0.000553	-0.157	398596
Han_Shandong	Nepal_Samdzong_1500BP	Tibetan_Shigatse	-6.6e-05	0.000492	-0.135	395990
Tibetan_Shannan	Haojiatai_LN	Tibetan_Shigatse	-7.7e-05	0.000587	-0.13	292061
Shimao_LN	Nepal_Samdzong_1500BP	Tibetan_Shigatse	-9.7e-05	0.000803	-0.121	375126
Haminmangha_MN	Nepal_Samdzong_1500BP	Tibetan_Shigatse	-0.000131	0.001123	-0.117	227765
Tibetan_Shannan	Shirenzigou_IA	Tibetan_Shigatse	-5.9e-05	0.000561	-0.105	281348
Tu_HGDP	Nepal_Samdzong_1500BP	Tibetan_Shigatse	-4.8e-05	0.000469	-0.102	401340
Tujia_HGDP	Nepal_Samdzong_1500BP	Tibetan_Shigatse	-5.1e-05	0.000514	-0.1	396247
Tibetan_Lhasa	Russia_Andronovo	Tibetan_Shigatse	-5.7e-05	0.00058	-0.098	402790
Yumin_EN	Nepal_Chokhopani_2700BP	Tibetan_Shigatse	-0.000166	0.001742	-0.095	305995
Tatar_Kazan	Nepal_Mebrak_2125BP	Tibetan_Shigatse	-7.9e-05	0.000973	-0.081	294236
Mongolia_EIA_2	Nepal_Mebrak_2125BP	Tibetan_Shigatse	-0.000149	0.001939	-0.077	198949
Han_Henan	Nepal_Samdzong_1500BP	Tibetan_Shigatse	-4.4e-05	0.000587	-0.075	388600
Abkhasian	Jinchankou_LN	Tibetan_Shigatse	-7.6e-05	0.001173	-0.065	302642
Ingushian	Nepal_Mebrak_2125BP	Tibetan_Shigatse	-6.7e-05	0.001094	-0.061	292210
Tibetan_Shannan	Mongolia_Chalcolithic_2_Afanasievo	Tibetan_Shigatse	-4.1e-05	0.000716	-0.057	282272
Tibetan_Shannan	Xiaojingshan_EN	Tibetan_Shigatse	-2.9e-05	0.000586	-0.05	219310
Mongolia_IA_Xianbei	Nepal_Chokhopani_2700BP	Tibetan_Shigatse	-8.5e-05	0.001777	-0.048	289907
Jiaozuoniecun_LBIA	Nepal_Samdzong_1500BP	Tibetan_Shigatse	-3e-05	0.000864	-0.034	348666
Oroqen_HGDP	Nepal_Mebrak_2125BP	Tibetan_Shigatse	-2.7e-05	0.000827	-0.033	272350
TibetanHO_Yunnan	Nepal_Mebrak_2125BP	Tibetan_Shigatse	-3e-05	0.000957	-0.031	262402
Tibetan_Shannan	Mongolia_Medieval	Tibetan_Shigatse	-1.5e-05	0.000736	-0.02	198191
Sherpa_Nepal	Taiwan_Gongguan	Tibetan_Shigatse	-1.7e-05	0.000931	-0.019	247384
Sherpa_Nepal	Xitoucun_LN	Tibetan_Shigatse	-1.4e-05	0.00075	-0.018	212890
Ukrainian	Miaozigou_MN	Tibetan_Shigatse	-2.1e-05	0.001225	-0.017	119263
Tibetan_Shannan	Jiaozuoniecun_LBIA	Tibetan_Shigatse	-9e-06	0.000575	-0.016	360978
Nanai	Nepal_Samdzong_1500BP	Tibetan_Shigatse	-8e-06	0.000575	-0.014	394331
Sila	Nepal_Samdzong_1500BP	Tibetan_Shigatse	-7e-06	0.000564	-0.012	391576
Tibetan_Shannan	Liangdao2_EN	Tibetan_Shigatse	-8e-06	0.000706	-0.011	329618
Yugur_Sunan	Nepal_Samdzong_1500BP	Tibetan_Shigatse	-5e-06	0.000475	-0.01	408645
Tibetan_Nagqu	Shirenzigou_IA_W	Tibetan_Shigatse	-4e-06	0.000735	-0.005	122478

## Sheet: Table S5
Table S5. Admxiture-f3-statistics of the form f3(Source population1, Source population2; Shannan Tibetan) showed the admixture signals for high-altitude adaptive Shannan Tibetan
Source1	Source2	Target	f_3	std.err	Z	SNPs
Qiang_Daofu	Nepal_Mebrak_2125BP	Tibetan_Shannan	-0.001732	0.000751	-2.307	270789
Tibetan_Nagqu	Nepal_Mebrak_2125BP	Tibetan_Shannan	-0.001693	0.000743	-2.277	267339
Tatar_Zabolotniye	Nepal_Mebrak_2125BP	Tibetan_Shannan	-0.002227	0.001044	-2.133	274895
Bashkir_north	Nepal_Mebrak_2125BP	Tibetan_Shannan	-0.001983	0.000938	-2.113	298096
Tibetan_Xinlong	Nepal_Mebrak_2125BP	Tibetan_Shannan	-0.00155	0.00075	-2.065	271246
Tibetan_Xunhua	Nepal_Mebrak_2125BP	Tibetan_Shannan	-0.002024	0.001	-2.024	262917
Tibetan_Yajiang	Nepal_Samdzong_1500BP	Tibetan_Shannan	-0.001022	0.000507	-2.013	393818
Tibetan_Yajiang	Nepal_Mebrak_2125BP	Tibetan_Shannan	-0.001553	0.000791	-1.963	269394
Chuvash	Nepal_Mebrak_2125BP	Tibetan_Shannan	-0.001942	0.001008	-1.927	294495
Tibetan_Gangcha	Nepal_Mebrak_2125BP	Tibetan_Shannan	-0.001278	0.000682	-1.875	281313
Miaozigou_MN	Nepal_Mebrak_2125BP	Tibetan_Shannan	-0.004352	0.002372	-1.835	69788
Tatar_Kazan	Nepal_Mebrak_2125BP	Tibetan_Shannan	-0.001691	0.000956	-1.769	293538
Mongolia_EIA_7_Xiongnu	Nepal_Mebrak_2125BP	Tibetan_Shannan	-0.003028	0.001733	-1.747	192930
Qiang_Daofu	Nepal_Samdzong_1500BP	Tibetan_Shannan	-0.000795	0.00046	-1.729	395396
Mongolia_Chalcolithic_1_Afanasievo	Nepal_Mebrak_2125BP	Tibetan_Shannan	-0.00282	0.001669	-1.69	199720
Mongolia_EIA_7_Xiongnu	Nepal_Samdzong_1500BP	Tibetan_Shannan	-0.001833	0.00111	-1.651	277812
Mongol_Minorities	Nepal_Mebrak_2125BP	Tibetan_Shannan	-0.001353	0.000831	-1.628	278466
Ulchi	Nepal_Mebrak_2125BP	Tibetan_Shannan	-0.001314	0.000808	-1.627	278346
Tu_HGDP	Nepal_Mebrak_2125BP	Tibetan_Shannan	-0.001196	0.000736	-1.626	274065
Ingushian	Nepal_Mebrak_2125BP	Tibetan_Shannan	-0.001805	0.001111	-1.625	291369
Buryat_Ehirit	Nepal_Mebrak_2125BP	Tibetan_Shannan	-0.001395	0.000861	-1.621	271339
Tibetan_Nagqu	Nepal_Samdzong_1500BP	Tibetan_Shannan	-0.000804	0.000507	-1.587	390725
Lak	Nepal_Mebrak_2125BP	Tibetan_Shannan	-0.001657	0.001072	-1.545	290111
Buryat_Bohansky	Nepal_Mebrak_2125BP	Tibetan_Shannan	-0.001535	0.001007	-1.524	266702
Tibetan_Lhasa	Zhalainuoer_IA	Tibetan_Shannan	-0.002149	0.001415	-1.518	21428
Khamnegan	Nepal_Mebrak_2125BP	Tibetan_Shannan	-0.001257	0.000838	-1.5	273439
Tibetan_Chamdo	Nepal_Mebrak_2125BP	Tibetan_Shannan	-0.001112	0.000742	-1.499	270695
Russia_IA	Nepal_Mebrak_2125BP	Tibetan_Shannan	-0.001686	0.001134	-1.487	264913
Russia_Lokomotiv_Eneolithic	Nepal_Mebrak_2125BP	Tibetan_Shannan	-0.002009	0.001381	-1.455	225998
Kabardinian	Nepal_Mebrak_2125BP	Tibetan_Shannan	-0.001557	0.001074	-1.45	288872
Mongolia_LBA_1_MongunTaiga	Nepal_Mebrak_2125BP	Tibetan_Shannan	-0.002885	0.001998	-1.444	126275
Mongolia_EIA_6_Pazyryk	Nepal_Mebrak_2125BP	Tibetan_Shannan	-0.002547	0.001783	-1.429	197010
Kazakh	Nepal_Mebrak_2125BP	Tibetan_Shannan	-0.001102	0.000786	-1.403	296681
Tibetan_Chamdo	Nepal_Samdzong_1500BP	Tibetan_Shannan	-0.000646	0.000468	-1.38	395279
Shor_Mountain	Nepal_Mebrak_2125BP	Tibetan_Shannan	-0.001282	0.000971	-1.32	274645
Nogai2	Nepal_Mebrak_2125BP	Tibetan_Shannan	-0.001082	0.00083	-1.303	291130
Kinh_HGDP	Nepal_Mebrak_2125BP	Tibetan_Shannan	-0.001074	0.000841	-1.277	270765
TibetanHO_Yunnan	Nepal_Mebrak_2125BP	Tibetan_Shannan	-0.001294	0.00102	-1.268	260612
XiongNu	Nepal_Samdzong_1500BP	Tibetan_Shannan	-0.000927	0.000733	-1.265	378477
Kyrgyz_Urumqi	Nepal_Mebrak_2125BP	Tibetan_Shannan	-0.001	0.000795	-1.258	289077
Mordovian	Nepal_Mebrak_2125BP	Tibetan_Shannan	-0.001271	0.001032	-1.232	303151
Nanai	Nepal_Samdzong_1500BP	Tibetan_Shannan	-0.000675	0.00055	-1.227	393025
Qiang_Danba	Nepal_Samdzong_1500BP	Tibetan_Shannan	-0.00062	0.000514	-1.205	392271
Tibetan_Lhasa	Nepal_Mebrak_2125BP	Tibetan_Shannan	-0.000863	0.00074	-1.167	268306
Russia_EBA_Yamnaya_Kalmykia	Miaozigou_MN	Tibetan_Shannan	-0.001952	0.001677	-1.164	102114
Russian_HGDP	Nepal_Mebrak_2125BP	Tibetan_Shannan	-0.00119	0.001032	-1.153	299565
Mongolia_EIA_2	Nepal_Mebrak_2125BP	Tibetan_Shannan	-0.002148	0.00189	-1.136	196727
Cambodian	Nepal_Mebrak_2125BP	Tibetan_Shannan	-0.001003	0.000885	-1.133	274699
Banlashan_MN	Nepal_Mebrak_2125BP	Tibetan_Shannan	-0.001634	0.001465	-1.116	254131
Shimao_LN	Nepal_Mebrak_2125BP	Tibetan_Shannan	-0.00155	0.001408	-1.101	253234
Tibetan_Lhasa	Mongolia_LBA_3_MongunTaiga	Tibetan_Shannan	-0.000595	0.000548	-1.086	364649
Chuanyun_H	Nepal_Chokhopani_2700BP	Tibetan_Shannan	-0.002247	0.00208	-1.08	119522
Tajik_Lowland	Nepal_Mebrak_2125BP	Tibetan_Shannan	-0.001105	0.001031	-1.072	292763
Yakut_HGDP	Nepal_Mebrak_2125BP	Tibetan_Shannan	-0.000866	0.000814	-1.064	283414
Xiaogao_EN	Nepal_Mebrak_2125BP	Tibetan_Shannan	-0.001866	0.001762	-1.059	221914
Khakass_Sagai	Nepal_Mebrak_2125BP	Tibetan_Shannan	-0.000949	0.000899	-1.055	283772
Russia_BA_Okunevo	Nepal_Mebrak_2125BP	Tibetan_Shannan	-0.001157	0.001104	-1.047	274272
Bashkir_south	Nepal_Mebrak_2125BP	Tibetan_Shannan	-0.000924	0.000885	-1.044	297650
Uzbek_Khorezm	Nepal_Mebrak_2125BP	Tibetan_Shannan	-0.001002	0.000963	-1.041	281796
Even	Nepal_Mebrak_2125BP	Tibetan_Shannan	-0.000892	0.000864	-1.033	282481
Ossetian	Nepal_Mebrak_2125BP	Tibetan_Shannan	-0.001078	0.001054	-1.023	297462
Circassian	Nepal_Mebrak_2125BP	Tibetan_Shannan	-0.001112	0.001091	-1.02	290346
Zhalainuoer_EN	Nepal_Mebrak_2125BP	Tibetan_Shannan	-0.002963	0.002914	-1.017	46703
Mongol_Uuld	Nepal_Mebrak_2125BP	Tibetan_Shannan	-0.000821	0.000823	-0.997	279455
Adygei	Nepal_Mebrak_2125BP	Tibetan_Shannan	-0.001031	0.001035	-0.996	303163
Russia_Andronovo	Nepal_Mebrak_2125BP	Tibetan_Shannan	-0.001333	0.001348	-0.989	266568
Russia_MLBA_Sintashta	Nepal_Mebrak_2125BP	Tibetan_Shannan	-0.001141	0.00116	-0.983	286321
Nanai	Nepal_Mebrak_2125BP	Tibetan_Shannan	-0.000825	0.000858	-0.961	269048
Russian	Nepal_Mebrak_2125BP	Tibetan_Shannan	-0.001004	0.001049	-0.957	307578
Kubachinian	Miaozigou_MN	Tibetan_Shannan	-0.001259	0.001318	-0.956	111583
Tibetan_Nagqu	Mongolia_Chalcolithic_1_Afanasievo	Tibetan_Shannan	-0.000712	0.000746	-0.953	296927
Abazin	Nepal_Mebrak_2125BP	Tibetan_Shannan	-0.001003	0.001056	-0.95	288665
Veps	Nepal_Mebrak_2125BP	Tibetan_Shannan	-0.001023	0.001086	-0.942	287547
Mongolia_LBA_1_MongunTaiga	Nepal_Chokhopani_2700BP	Tibetan_Shannan	-0.001822	0.001965	-0.927	177111
Mongolia_IA_Xianbei	Nepal_Chokhopani_2700BP	Tibetan_Shannan	-0.001598	0.001724	-0.927	286822
Dong_Hunan	Nepal_Samdzong_1500BP	Tibetan_Shannan	-0.00055	0.000601	-0.915	390936
Kurd	Nepal_Mebrak_2125BP	Tibetan_Shannan	-0.001039	0.001137	-0.914	288798
Oroqen_HGDP	Nepal_Mebrak_2125BP	Tibetan_Shannan	-0.000764	0.000841	-0.908	271346
Tibetan_Lhasa	Russia_EBA_Yamnaya_Kalmykia	Tibetan_Shannan	-0.000547	0.000604	-0.906	387814
Ulchi	Nepal_Samdzong_1500BP	Tibetan_Shannan	-0.000465	0.000518	-0.897	405961
Selkup	Nepal_Mebrak_2125BP	Tibetan_Shannan	-0.000811	0.000907	-0.894	290048
Abkhasian	Nepal_Mebrak_2125BP	Tibetan_Shannan	-0.000973	0.001091	-0.892	291882
Evenk_Transbaikal	Nepal_Mebrak_2125BP	Tibetan_Shannan	-0.000887	0.000995	-0.891	270023
Tubalar	Nepal_Mebrak_2125BP	Tibetan_Shannan	-0.000756	0.000851	-0.888	292437
Zhalainuoer_EN	Nepal_Chokhopani_2700BP	Tibetan_Shannan	-0.002363	0.002669	-0.885	66636
Negidal	Nepal_Mebrak_2125BP	Tibetan_Shannan	-0.000951	0.001075	-0.885	259738
Russia_Caucasus_EBA_Yamnaya	Miaozigou_MN	Tibetan_Shannan	-0.001694	0.001943	-0.872	80580
Ukrainian	Nepal_Mebrak_2125BP	Tibetan_Shannan	-0.000941	0.001083	-0.869	301206
Russia_MLBA_Krasnoyarsk	Nepal_Mebrak_2125BP	Tibetan_Shannan	-0.001009	0.001169	-0.863	274684
Yumin_EN	Nepal_Chokhopani_2700BP	Tibetan_Shannan	-0.001515	0.001765	-0.858	302778
Chuanyun_H	Nepal_Mebrak_2125BP	Tibetan_Shannan	-0.00186	0.002223	-0.836	84304
Uzbek_Tashkent	Nepal_Mebrak_2125BP	Tibetan_Shannan	-0.000762	0.000921	-0.827	288335
Tibetan_Chamdo	Russia_EBA_Yamnaya_Kalmykia	Tibetan_Shannan	-0.000467	0.000569	-0.821	390449
Mongolia_MBA_2_Munkhkhairkhan	Nepal_Mebrak_2125BP	Tibetan_Shannan	-0.001421	0.001748	-0.813	203500
Japanese_HGDP	Nepal_Samdzong_1500BP	Tibetan_Shannan	-0.000403	0.000499	-0.807	407293
Tibetan_Lhasa	Shirenzigou_IA_E	Tibetan_Shannan	-0.000979	0.001215	-0.806	38788
Russian_Leshukonsky	Nepal_Mebrak_2125BP	Tibetan_Shannan	-0.000909	0.001128	-0.806	280187
Tibetan_Lhasa	Russia_MLBA_Krasnoyarsk	Tibetan_Shannan	-0.00043	0.000537	-0.801	405778
Cong	Nepal_Mebrak_2125BP	Tibetan_Shannan	-0.000685	0.000857	-0.8	271453
Tibetan_Lhasa	Russia_MLBA_Sintashta	Tibetan_Shannan	-0.000414	0.000527	-0.786	422534
Russia_EBA_Yamnaya_Kalmykia	Jinchankou_LN	Tibetan_Shannan	-0.001095	0.001412	-0.776	265967
Sherpa_Nepal	Zhalainuoer_IA	Tibetan_Shannan	-0.001491	0.001941	-0.768	20812
Mongolia_LBA_3_MongunTaiga	Nepal_Mebrak_2125BP	Tibetan_Shannan	-0.000956	0.001247	-0.766	243377
Bianbian_EN	Nepal_Samdzong_1500BP	Tibetan_Shannan	-0.000892	0.001168	-0.763	253085
Haojiatai_LBIA	Nepal_Samdzong_1500BP	Tibetan_Shannan	-0.000829	0.001099	-0.754	296116
Karelian	Nepal_Mebrak_2125BP	Tibetan_Shannan	-0.000792	0.001065	-0.744	294085
Liangdao1_EN	Zhalainuoer_IA	Tibetan_Shannan	-0.004444	0.006022	-0.738	9426
Zhalainuoer_IA	Nepal_Mebrak_2125BP	Tibetan_Shannan	-0.003561	0.004875	-0.73	14243
Japanese_HGDP	Nepal_Mebrak_2125BP	Tibetan_Shannan	-0.000545	0.00075	-0.726	279332
Tibetan_Shigatse	Nepal_Mebrak_2125BP	Tibetan_Shannan	-0.000529	0.00073	-0.725	269183
Longtoushan_BA	Nepal_Samdzong_1500BP	Tibetan_Shannan	-0.000743	0.001033	-0.719	210771
Mongolia_N_East	Nepal_Samdzong_1500BP	Tibetan_Shannan	-0.00062	0.000869	-0.713	335672
Tibetan_Lhasa	Mogushan_Xianbei_IA	Tibetan_Shannan	-0.000602	0.00085	-0.708	102895
Bashkir_central	Nepal_Mebrak_2125BP	Tibetan_Shannan	-0.00065	0.000917	-0.708	296759
Russia_Srubnaya	Nepal_Mebrak_2125BP	Tibetan_Shannan	-0.000842	0.001196	-0.703	277139
Baoan_Jishishan	Nepal_Samdzong_1500BP	Tibetan_Shannan	-0.000368	0.000525	-0.701	402344
Russian_Leshukonsky	Tibetan_Lhasa	Tibetan_Shannan	-0.000358	0.000512	-0.7	415542
Russian_Pinezhsky	Nepal_Mebrak_2125BP	Tibetan_Shannan	-0.000794	0.001136	-0.699	281330
Tibetan_Lhasa	Russia_Caucasus_EBA_Yamnaya	Tibetan_Shannan	-0.000447	0.00064	-0.699	295291
Jinchankou_LN	Mongolia_Chalcolithic_1_Afanasievo	Tibetan_Shannan	-0.001317	0.001888	-0.698	204525
Udmurt	Nepal_Mebrak_2125BP	Tibetan_Shannan	-0.000695	0.001008	-0.689	287331
UstBelaya_EBA	Nepal_Mebrak_2125BP	Tibetan_Shannan	-0.000855	0.001243	-0.688	253517
Tu_HGDP	Nepal_Samdzong_1500BP	Tibetan_Shannan	-0.000347	0.000506	-0.685	400203
Han_Shanghai	Nepal_Mebrak_2125BP	Tibetan_Shannan	-0.00079	0.001159	-0.682	257728
Dong_Guizhou	Nepal_Samdzong_1500BP	Tibetan_Shannan	-0.000366	0.000541	-0.676	400098
Russia_Shamanka_EBA	Nepal_Mebrak_2125BP	Tibetan_Shannan	-0.000907	0.001344	-0.675	233368
Miaozigou_MN	Nepal_Samdzong_1500BP	Tibetan_Shannan	-0.000982	0.001458	-0.674	101220
Yi_HGDP	Nepal_Samdzong_1500BP	Tibetan_Shannan	-0.00036	0.000535	-0.674	393986
Tajik	Nepal_Mebrak_2125BP	Tibetan_Shannan	-0.000726	0.001095	-0.663	289133
Russia_Steppe_Maikop	Nepal_Mebrak_2125BP	Tibetan_Shannan	-0.000892	0.001347	-0.662	243735
Daur_HGDP	Nepal_Mebrak_2125BP	Tibetan_Shannan	-0.000533	0.00081	-0.657	271957
Kalmyk	Nepal_Mebrak_2125BP	Tibetan_Shannan	-0.000532	0.00081	-0.657	280837
Altaian	Nepal_Mebrak_2125BP	Tibetan_Shannan	-0.000508	0.000777	-0.653	295542
XiongNu_WE	Nepal_Mebrak_2125BP	Tibetan_Shannan	-0.000957	0.00148	-0.646	235729
Mongolia_EIA_8	Nepal_Mebrak_2125BP	Tibetan_Shannan	-0.001143	0.001781	-0.642	194952
Mongol_Sainnoyon	Nepal_Mebrak_2125BP	Tibetan_Shannan	-0.000537	0.000854	-0.629	275345
Khovsgol_LBA	Nepal_Mebrak_2125BP	Tibetan_Shannan	-0.00058	0.000929	-0.624	263032
Tatar_Siberian	Nepal_Mebrak_2125BP	Tibetan_Shannan	-0.000537	0.00087	-0.617	295398
Tibetan_Shigatse	Mongolia_LBA_3_MongunTaiga	Tibetan_Shannan	-0.00032	0.000519	-0.617	365662
Dongxiang_Linxia	Nepal_Mebrak_2125BP	Tibetan_Shannan	-0.000502	0.000829	-0.606	273080
Kumyk	Nepal_Mebrak_2125BP	Tibetan_Shannan	-0.000657	0.001089	-0.604	290695
Russia_Poltavka	Nepal_Mebrak_2125BP	Tibetan_Shannan	-0.000783	0.001301	-0.602	267029
Tofalar	Nepal_Mebrak_2125BP	Tibetan_Shannan	-0.000574	0.000958	-0.599	275636
Tibetan_Chamdo	Nepal_Chokhopani_2700BP	Tibetan_Shannan	-0.000424	0.000712	-0.595	392702
Tibetan_Lhasa	Russia_Srubnaya_Alakul	Tibetan_Shannan	-0.000317	0.00054	-0.588	415224
Mongolia_EBA_2_Chemurchek	Nepal_Mebrak_2125BP	Tibetan_Shannan	-0.000911	0.001562	-0.583	226017
Mansi	Nepal_Mebrak_2125BP	Tibetan_Shannan	-0.000572	0.000994	-0.576	281516
Dao	Nepal_Samdzong_1500BP	Tibetan_Shannan	-0.00032	0.000562	-0.569	395843
Li_Hainan	Nepal_Mebrak_2125BP	Tibetan_Shannan	-0.000585	0.001032	-0.567	264541
Baoan_Jishishan	Nepal_Mebrak_2125BP	Tibetan_Shannan	-0.000437	0.000779	-0.56	275685
Mongolia_LBA_2_Ulaanzukh	Nepal_Mebrak_2125BP	Tibetan_Shannan	-0.000659	0.001186	-0.555	232502
Atayal	Nepal_Samdzong_1500BP	Tibetan_Shannan	-0.000376	0.000686	-0.547	388764
Dolgan	Nepal_Mebrak_2125BP	Tibetan_Shannan	-0.000556	0.00103	-0.539	267511
Buryat_Duldurginsky	Nepal_Mebrak_2125BP	Tibetan_Shannan	-0.000537	0.000998	-0.537	266440
Tlingit	Nepal_Mebrak_2125BP	Tibetan_Shannan	-0.000596	0.001109	-0.537	274193
Kubachinian	Tibetan_Lhasa	Tibetan_Shannan	-0.000293	0.000547	-0.536	418393
Mongol_Zasagt	Nepal_Mebrak_2125BP	Tibetan_Shannan	-0.000436	0.000834	-0.523	273631
Mongolia_EBA_1_Ulgii	Nepal_Mebrak_2125BP	Tibetan_Shannan	-0.000637	0.001241	-0.514	240512
Nivkh	Nepal_Mebrak_2125BP	Tibetan_Shannan	-0.000477	0.000933	-0.512	266846
Mlabri	Nepal_Mebrak_2125BP	Tibetan_Shannan	-0.000658	0.001295	-0.508	257173
Russian	Tibetan_Lhasa	Tibetan_Shannan	-0.000255	0.000504	-0.506	448652
Han_Jiangsu	Nepal_Mebrak_2125BP	Tibetan_Shannan	-0.000431	0.000863	-0.499	266650
Mongolia_IA_Xianbei	Nepal_Samdzong_1500BP	Tibetan_Shannan	-0.000564	0.001142	-0.494	290944
Shimao_LN	Nepal_Samdzong_1500BP	Tibetan_Shannan	-0.000394	0.000833	-0.472	371777
Tajik	Tibetan_Lhasa	Tibetan_Shannan	-0.000236	0.000501	-0.472	425579
Tibetan_Gannan	Nepal_Mebrak_2125BP	Tibetan_Shannan	-0.000409	0.000879	-0.465	267706
Japanese_Tokyo1K	Nepal_Mebrak_2125BP	Tibetan_Shannan	-0.000343	0.000737	-0.465	284197
Tibetan_Lhasa	Russia_EBA_Yamnaya_Samara	Tibetan_Shannan	-0.000266	0.000573	-0.464	401955
Mongolia_Chalcolithic_2_Afanasievo	Nepal_Mebrak_2125BP	Tibetan_Shannan	-0.000843	0.001829	-0.461	188251
Tibetan_Chamdo	Russia_North_Caucasus	Tibetan_Shannan	-0.000266	0.000579	-0.46	319240
Tibetan_Lhasa	Mongolia_EIA_5	Tibetan_Shannan	-0.000342	0.000751	-0.455	275010
Tibetan_Lhasa	Russia_Andronovo	Tibetan_Shannan	-0.000262	0.000575	-0.455	401541
Buryat_Selenginsky	Nepal_Mebrak_2125BP	Tibetan_Shannan	-0.000419	0.000949	-0.442	269291
Buryat_Zakamensky	Nepal_Mebrak_2125BP	Tibetan_Shannan	-0.00039	0.000891	-0.438	271469
Lak	Nepal_Chokhopani_2700BP	Tibetan_Shannan	-0.000507	0.001164	-0.436	420690
Karakalpak	Nepal_Mebrak_2125BP	Tibetan_Shannan	-0.000342	0.000798	-0.428	297007
Qihe_EN	Nepal_Mebrak_2125BP	Tibetan_Shannan	-0.000942	0.002228	-0.423	88232
Tibetan_Nagqu	Nepal_Chokhopani_2700BP	Tibetan_Shannan	-0.000328	0.00078	-0.42	387763
Russia_OldBeringSea_Ekven	Nepal_Mebrak_2125BP	Tibetan_Shannan	-0.000445	0.001065	-0.418	264372
Russia_Sintashta_MLBA	Nepal_Mebrak_2125BP	Tibetan_Shannan	-0.000621	0.001488	-0.417	240050
Haojiatai_LBIA	Nepal_Mebrak_2125BP	Tibetan_Shannan	-0.000734	0.001787	-0.411	203788
PaThen	Nepal_Samdzong_1500BP	Tibetan_Shannan	-0.000258	0.000628	-0.411	390664
Mongolia_EIA_1_SlabGrave	Nepal_Mebrak_2125BP	Tibetan_Shannan	-0.00037	0.000906	-0.408	262561
Nogai	Nepal_Mebrak_2125BP	Tibetan_Shannan	-0.0004	0.000978	-0.408	290684
Lahu_HGDP	Tibetan_Lhasa	Tibetan_Shannan	-0.000171	0.000419	-0.408	399144
Circassian	Tibetan_Lhasa	Tibetan_Shannan	-0.000204	0.000504	-0.404	426981
Miaozigou_MN	Mongolia_EBA_2_Chemurchek	Tibetan_Shannan	-0.000778	0.00194	-0.401	90321
China_Tianyuan	Nepal_Mebrak_2125BP	Tibetan_Shannan	-0.000749	0.001904	-0.393	222891
Tibetan_Shigatse	Mogushan_Xianbei_IA	Tibetan_Shannan	-0.000308	0.000797	-0.387	103165
Yi_HGDP	Nepal_Mebrak_2125BP	Tibetan_Shannan	-0.000306	0.000791	-0.387	269751
Russian_Krasnoborsky	Nepal_Mebrak_2125BP	Tibetan_Shannan	-0.000424	0.001114	-0.38	283456
Malay	Tibetan_Lhasa	Tibetan_Shannan	-0.000149	0.000394	-0.378	407669
Aleut	Nepal_Mebrak_2125BP	Tibetan_Shannan	-0.000372	0.001026	-0.363	282452
Mongolia_LBA_4_CenterWest	Nepal_Mebrak_2125BP	Tibetan_Shannan	-0.000339	0.000938	-0.362	264852
Tibetan_Shigatse	Mongolia_EIA_2	Tibetan_Shannan	-0.000259	0.000729	-0.356	295847
Mongol_Minorities	Nepal_Samdzong_1500BP	Tibetan_Shannan	-0.000181	0.000511	-0.354	406674
Tibetan_Xinlong	Nepal_Samdzong_1500BP	Tibetan_Shannan	-0.000179	0.000508	-0.353	396187
Russia_UstBelaya_Angara	Nepal_Mebrak_2125BP	Tibetan_Shannan	-0.000379	0.001081	-0.35	253484
Tay	Nepal_Mebrak_2125BP	Tibetan_Shannan	-0.000302	0.000866	-0.349	270557
Han_Shanxi	Nepal_Mebrak_2125BP	Tibetan_Shannan	-0.000282	0.000829	-0.34	268632
Cham	Nepal_Mebrak_2125BP	Tibetan_Shannan	-0.000282	0.000836	-0.338	277998
Mongolia_EIA_6_Pazyryk	Nepal_Chokhopani_2700BP	Tibetan_Shannan	-0.000581	0.001743	-0.333	279758
Tuvinian	Nepal_Mebrak_2125BP	Tibetan_Shannan	-0.000266	0.000799	-0.333	287895
Russia_Sarmatian	Nepal_Mebrak_2125BP	Tibetan_Shannan	-0.00046	0.001394	-0.33	227613
Russian	Miaozigou_MN	Tibetan_Shannan	-0.000387	0.001179	-0.328	121485
Tibetan_Lhasa	Mordovian	Tibetan_Shannan	-0.000157	0.00048	-0.328	442603
Xibo_HGDP	Nepal_Samdzong_1500BP	Tibetan_Shannan	-0.000181	0.000567	-0.319	393524
Russian_Krasnoborsky	Tibetan_Lhasa	Tibetan_Shannan	-0.000169	0.000532	-0.318	419101
Han_Guangdong	Nepal_Mebrak_2125BP	Tibetan_Shannan	-0.000269	0.000873	-0.308	267911
Han_Henan	Nepal_Mebrak_2125BP	Tibetan_Shannan	-0.000273	0.000892	-0.306	264171
Mongolia_EIA_5	Nepal_Mebrak_2125BP	Tibetan_Shannan	-0.000581	0.001903	-0.305	184550
Mlabri	Nepal_Samdzong_1500BP	Tibetan_Shannan	-0.000255	0.000841	-0.303	376813
Ukrainian	Miaozigou_MN	Tibetan_Shannan	-0.000363	0.001209	-0.3	118993
Hezhen_HGDP	Nepal_Samdzong_1500BP	Tibetan_Shannan	-0.00016	0.000534	-0.299	393348
Kumyk	Miaozigou_MN	Tibetan_Shannan	-0.00036	0.001208	-0.298	114741
Yugur_Sunan	Nepal_Mebrak_2125BP	Tibetan_Shannan	-0.000206	0.00073	-0.282	279982
Tibetan_Shigatse	Nepal_Chokhopani_2700BP	Tibetan_Shannan	-0.0002	0.000711	-0.282	390465
LoLo	Nepal_Mebrak_2125BP	Tibetan_Shannan	-0.000258	0.000917	-0.281	268141
Mongolia_EIA_4_Sagly	Nepal_Mebrak_2125BP	Tibetan_Shannan	-0.000269	0.000959	-0.28	277268
Korean	Nepal_Mebrak_2125BP	Tibetan_Shannan	-0.000253	0.000908	-0.278	265222
Dusun	Nepal_Mebrak_2125BP	Tibetan_Shannan	-0.000256	0.000921	-0.278	270433
Russia_Late_Sarmatian	Jinchankou_LN	Tibetan_Shannan	-0.000378	0.001376	-0.275	262756
Tibetan_Shigatse	Mongolia_Chalcolithic_1_Afanasievo	Tibetan_Shannan	-0.000197	0.000718	-0.274	298852
Russia_Srubnaya_Alakul	Nepal_Mebrak_2125BP	Tibetan_Shannan	-0.000321	0.001184	-0.271	278572
Kubachinian	Nepal_Mebrak_2125BP	Tibetan_Shannan	-0.000325	0.001207	-0.269	282841
Mogolian_HGDP	Nepal_Mebrak_2125BP	Tibetan_Shannan	-0.000236	0.000891	-0.265	268220
Yakut_HGDP	Nepal_Samdzong_1500BP	Tibetan_Shannan	-0.000134	0.000516	-0.26	413225
Russian_Pinezhsky	Nepal_Chokhopani_2700BP	Tibetan_Shannan	-0.000305	0.001185	-0.257	408233
Tibetan_Shigatse	Russia_EBA_Yamnaya_Samara	Tibetan_Shannan	-0.000145	0.000567	-0.256	402790
Mongolia_LBA_3_MongunTaiga	Nepal_Chokhopani_2700BP	Tibetan_Shannan	-0.000322	0.001276	-0.252	349274
Tajik_Mountain	Tibetan_Shigatse	Tibetan_Shannan	-0.000119	0.000473	-0.252	429484
Russia_North_Caucasus	Nepal_Chokhopani_2700BP	Tibetan_Shannan	-0.000344	0.001397	-0.247	304335
Tatar_Mishar	Nepal_Mebrak_2125BP	Tibetan_Shannan	-0.000248	0.001026	-0.242	290654
Gurung_Nepal	Tibetan_Lhasa	Tibetan_Shannan	-9.7e-05	0.0004	-0.242	397932
Abkhasian	Tibetan_Lhasa	Tibetan_Shannan	-0.000126	0.000522	-0.24	429306
DevilsCave_N	Nepal_Samdzong_1500BP	Tibetan_Shannan	-0.000202	0.000856	-0.236	378566
Daur_HGDP	Nepal_Samdzong_1500BP	Tibetan_Shannan	-0.000126	0.00055	-0.23	397331
Tibetan_Lhasa	Nogai	Tibetan_Shannan	-0.000104	0.000452	-0.23	427133
Kabardinian	Tibetan_Lhasa	Tibetan_Shannan	-0.000115	0.000513	-0.224	425248
Tibetan_Shigatse	Russia_MLBA_Sintashta	Tibetan_Shannan	-0.000117	0.000534	-0.218	423159
Tibetan_Chamdo	Russia_MLBA_Sintashta	Tibetan_Shannan	-0.000106	0.000493	-0.216	424232
Tibetan_Lhasa	China_Tianyuan	Tibetan_Shannan	-0.000167	0.000783	-0.214	337070
Russia_Caucasus_EBA_Yamnaya	Nepal_Mebrak_2125BP	Tibetan_Shannan	-0.000331	0.00157	-0.211	199631
Tibetan_Lhasa	Russia_Srubnaya	Tibetan_Shannan	-0.000114	0.000541	-0.211	412381
Buryat_Aginsky	Nepal_Mebrak_2125BP	Tibetan_Shannan	-0.000172	0.000827	-0.208	279468
Ket	Nepal_Mebrak_2125BP	Tibetan_Shannan	-0.000184	0.000906	-0.203	282732
Cambodian	Nepal_Samdzong_1500BP	Tibetan_Shannan	-0.000112	0.000569	-0.197	401281
Mongol_Zasagt	Nepal_Samdzong_1500BP	Tibetan_Shannan	-0.000109	0.000556	-0.196	399722
Shor_Khakassia	Nepal_Mebrak_2125BP	Tibetan_Shannan	-0.000209	0.001072	-0.195	270620
Tibetan_Lhasa	Japan_Jomon	Tibetan_Shannan	-0.000121	0.00062	-0.195	382153
Ossetian	Tibetan_Lhasa	Tibetan_Shannan	-9.6e-05	0.000493	-0.195	435646
Xibo_HGDP	Nepal_Mebrak_2125BP	Tibetan_Shannan	-0.000157	0.000828	-0.189	269196
Tibetan_Chamdo	Russia_EBA_Yamnaya_Samara	Tibetan_Shannan	-0.000102	0.00055	-0.186	404401
Tujia_HGDP	Nepal_Samdzong_1500BP	Tibetan_Shannan	-9.7e-05	0.000529	-0.184	395054
Htin_Mal	Nepal_Mebrak_2125BP	Tibetan_Shannan	-0.000179	0.000977	-0.183	264078
Ingushian	Jinchankou_LN	Tibetan_Shannan	-0.000211	0.001162	-0.182	301320
Japan_Jomon	Nepal_Samdzong_1500BP	Tibetan_Shannan	-0.000164	0.000915	-0.18	368809
Tajik_Lowland	Tibetan_Lhasa	Tibetan_Shannan	-8.3e-05	0.00047	-0.176	429276
Jinchankou_LN	Shirenzigou_IA_E	Tibetan_Shannan	-0.000657	0.003757	-0.175	26324
Tagalog	Tibetan_Lhasa	Tibetan_Shannan	-7.4e-05	0.000425	-0.175	399114
UstBelaya_EBA	Nepal_Chokhopani_2700BP	Tibetan_Shannan	-0.000217	0.001251	-0.174	367411
Suogang_LN	Wuqi_EN	Tibetan_Shannan	-0.001232	0.007134	-0.173	6784
Naxi_HGDP	Nepal_Samdzong_1500BP	Tibetan_Shannan	-8.9e-05	0.000516	-0.172	392801
Kusunda	Tibetan_Lhasa	Tibetan_Shannan	-7e-05	0.000413	-0.17	409209
Tharu_Nepal	Nepal_Mebrak_2125BP	Tibetan_Shannan	-0.000159	0.000943	-0.168	273846
Hezhen_HGDP	Nepal_Mebrak_2125BP	Tibetan_Shannan	-0.00014	0.000858	-0.163	269076
Tibetan_Lhasa	Bashkir_north	Tibetan_Shannan	-7.3e-05	0.000449	-0.163	435669
Tibetan_Shigatse	Russia_Srubnaya	Tibetan_Shannan	-8.9e-05	0.000548	-0.162	413172
Tibetan_Lhasa	Russia_Afanasievo	Tibetan_Shannan	-8.3e-05	0.000538	-0.155	423945
Tibetan_Lhasa	Tatar_Kazan	Tibetan_Shannan	-7.1e-05	0.000459	-0.154	430140
Longtoushan_BA	Nepal_Chokhopani_2700BP	Tibetan_Shannan	-0.000245	0.001681	-0.146	207925
Tibetan_Lhasa	Uzbek_Khorezm	Tibetan_Shannan	-6.4e-05	0.000454	-0.142	416130
Russia_EarlySarmatian_SouthernUrals	Nepal_Mebrak_2125BP	Tibetan_Shannan	-0.000206	0.001461	-0.141	202214
Oroqen_HGDP	Nepal_Samdzong_1500BP	Tibetan_Shannan	-7.2e-05	0.000527	-0.137	396249
Russian_Leshukonsky	Sherpa_Nepal	Tibetan_Shannan	-9.1e-05	0.000666	-0.137	410981
Tibetan_Lhasa	Russia_Late_Sarmatian	Tibetan_Shannan	-8.1e-05	0.000596	-0.136	384329
Tibetan_Gangcha	Nepal_Samdzong_1500BP	Tibetan_Shannan	-6e-05	0.000447	-0.134	409838
Sherpa_Nepal	Mongolia_EIA_2	Tibetan_Shannan	-0.000124	0.00094	-0.132	287663
TibetanHO_Yunnan	Nepal_Samdzong_1500BP	Tibetan_Shannan	-8.4e-05	0.000664	-0.126	381864
Lak	Tibetan_Lhasa	Tibetan_Shannan	-6.7e-05	0.000538	-0.125	426498
PhuLa	Nepal_Mebrak_2125BP	Tibetan_Shannan	-0.000102	0.000838	-0.122	270370
Tibetan_Shigatse	Kumyk	Tibetan_Shannan	-5.9e-05	0.000518	-0.114	428194
Russia_MLBA_Sintashta	Jinchankou_LN	Tibetan_Shannan	-0.000126	0.001179	-0.106	295697
Maonan_Huanjiang	Nepal_Mebrak_2125BP	Tibetan_Shannan	-8.4e-05	0.000807	-0.104	275532
Dacaozi_IA	Nepal_Samdzong_1500BP	Tibetan_Shannan	-8e-05	0.000803	-0.1	363760
Dai_HGDP	Nepal_Samdzong_1500BP	Tibetan_Shannan	-5.6e-05	0.00057	-0.098	396339
Tibetan_Yajiang	Nepal_Chokhopani_2700BP	Tibetan_Shannan	-7.5e-05	0.00078	-0.097	390797
Han_Zhejiang	Nepal_Mebrak_2125BP	Tibetan_Shannan	-8.9e-05	0.00093	-0.096	263924
Tibetan_Lhasa	Russia_Karasuk	Tibetan_Shannan	-4.9e-05	0.000512	-0.096	408953
Abazin	Tibetan_Lhasa	Tibetan_Shannan	-4.7e-05	0.00051	-0.093	424818
Russian_HGDP	Tibetan_Lhasa	Tibetan_Shannan	-4.5e-05	0.000488	-0.093	438017
Mongolia_Mongol	Nepal_Chokhopani_2700BP	Tibetan_Shannan	-0.000123	0.001412	-0.087	308796
Russian_Leshukonsky	Miaozigou_MN	Tibetan_Shannan	-0.00011	0.001276	-0.086	110686
Mongolia_N_East	Nepal_Mebrak_2125BP	Tibetan_Shannan	-0.000115	0.001429	-0.081	230750
Miaozigou_MN	Shirenzigou_IA_W	Tibetan_Shannan	-0.000243	0.003131	-0.078	32497
Qiang_Danba	Nepal_Mebrak_2125BP	Tibetan_Shannan	-6.2e-05	0.000812	-0.076	268430
Russia_EBA_Yamnaya_Samara	Nepal_Mebrak_2125BP	Tibetan_Shannan	-9.8e-05	0.001285	-0.076	268890
Uyghur_HGDP	Nepal_Mebrak_2125BP	Tibetan_Shannan	-6.1e-05	0.000826	-0.074	288352
Mongol_Uuld	Nepal_Samdzong_1500BP	Tibetan_Shannan	-3.7e-05	0.000528	-0.07	407865
Dongxiang_Linxia	Nepal_Samdzong_1500BP	Tibetan_Shannan	-3.5e-05	0.000557	-0.063	398782
Tibetan_Lhasa	Shirenzigou_IA_W	Tibetan_Shannan	-4.4e-05	0.000732	-0.06	122261
Zhuang_Guangxi	Nepal_Mebrak_2125BP	Tibetan_Shannan	-4.7e-05	0.000812	-0.058	277294
Tibetan_Lhasa	Russia_Alan	Tibetan_Shannan	-3e-05	0.000548	-0.056	400401
Yugur_Sunan	Nepal_Samdzong_1500BP	Tibetan_Shannan	-2.7e-05	0.000488	-0.055	408124
Han_Fujian	Nepal_Samdzong_1500BP	Tibetan_Shannan	-3.1e-05	0.00063	-0.049	386818
Tibetan_Shigatse	Mongolia_EIA_6_Pazyryk	Tibetan_Shannan	-3.5e-05	0.000728	-0.048	295777
Ami	Nepal_Mebrak_2125BP	Tibetan_Shannan	-4.6e-05	0.000977	-0.047	268356
Tibetan_Shigatse	Russia_EBA_Yamnaya_Kalmykia	Tibetan_Shannan	-2.5e-05	0.000587	-0.043	388779
KhoMu	Nepal_Mebrak_2125BP	Tibetan_Shannan	-3.5e-05	0.00087	-0.041	272842
Tibetan_Chamdo	Russia_Srubnaya_Alakul	Tibetan_Shannan	-1.8e-05	0.000513	-0.034	417451
Tibetan_Chamdo	Mongolia_Chalcolithic_1_Afanasievo	Tibetan_Shannan	-2.4e-05	0.000733	-0.033	300446
Tibetan_Chamdo	Russia_Srubnaya	Tibetan_Shannan	-1.6e-05	0.000515	-0.032	414473
Cham	Nepal_Samdzong_1500BP	Tibetan_Shannan	-1.6e-05	0.000561	-0.028	405528
Nganasan	Nepal_Mebrak_2125BP	Tibetan_Shannan	-2.6e-05	0.001013	-0.026	277679
Khamnegan	Nepal_Samdzong_1500BP	Tibetan_Shannan	-1.3e-05	0.000559	-0.023	399534
Veps	Miaozigou_MN	Tibetan_Shannan	-2.4e-05	0.001229	-0.019	113548
Sherpa_Nepal	Tibetan_Lhasa	Tibetan_Shannan	-8e-06	0.00044	-0.019	393396
Russian_Krasnoborsky	Nepal_Chokhopani_2700BP	Tibetan_Shannan	-2.3e-05	0.001186	-0.019	411270
Lak	Tibetan_Shigatse	Tibetan_Shannan	-1e-05	0.000522	-0.019	426904
Tibetan_Lhasa	Mansi	Tibetan_Shannan	-7e-06	0.000466	-0.016	415995
Tibetan_Lhasa	Karelian	Tibetan_Shannan	-8e-06	0.000496	-0.016	431349
Kankanaey	Nepal_Mebrak_2125BP	Tibetan_Shannan	-1.4e-05	0.000979	-0.014	266359
Tibetan_Shigatse	Tatar_Mishar	Tibetan_Shannan	-7e-06	0.000492	-0.014	427538
Tibetan_Lhasa	Mongolia_IA_Xianbei	Tibetan_Shannan	-6e-06	0.000711	-0.008	303376
BoY	Nepal_Samdzong_1500BP	Tibetan_Shannan	-4e-06	0.000644	-0.006	392861
Giarai	Nepal_Mebrak_2125BP	Tibetan_Shannan	-4e-06	0.000868	-0.005	277624

## Sheet: Table S6
Table S6. Admxiture-f3-statistics of the form f3(Source population1, Source population2; Lhasa Tibetan) showed the admixture signals for high-altitude adaptive Lhasa Tibetan
Source1	Source2	Target	f_3	std.err	Z	SNPs
Tibetan_Chamdo	Nepal_Samdzong_1500BP	Tibetan_Lhasa	-0.001535	0.000452	-3.392	395061
Qiang_Danba	Nepal_Samdzong_1500BP	Tibetan_Lhasa	-0.001635	0.000509	-3.211	392369
Tibetan_Shannan	Bianbian_EN	Tibetan_Lhasa	-0.002226	0.000711	-3.132	263820
Tibetan_Shannan	Russia_UstIda_LN	Tibetan_Lhasa	-0.001633	0.000544	-3.003	358821
Bianbian_EN	Nepal_Samdzong_1500BP	Tibetan_Lhasa	-0.003308	0.001146	-2.886	253147
Tibetan_Nagqu	Nepal_Samdzong_1500BP	Tibetan_Lhasa	-0.001398	0.000498	-2.808	390693
Qiang_Daofu	Nepal_Samdzong_1500BP	Tibetan_Lhasa	-0.001289	0.000476	-2.708	395382
Tibetan_Yajiang	Nepal_Samdzong_1500BP	Tibetan_Lhasa	-0.001358	0.000514	-2.644	393674
Han_Chongqing	Tibetan_Shannan	Tibetan_Lhasa	-0.00111	0.000453	-2.449	393066
Sila	Tibetan_Shannan	Tibetan_Lhasa	-0.000963	0.000409	-2.353	397121
Qiang_Danba	Tibetan_Shannan	Tibetan_Lhasa	-0.000842	0.000359	-2.347	398859
Tibetan_Shigatse	Bianbian_EN	Tibetan_Lhasa	-0.001673	0.000719	-2.327	264879
Tibetan_Gannan	Tibetan_Shannan	Tibetan_Lhasa	-0.000895	0.000385	-2.327	399884
Han_Shandong	Tibetan_Shannan	Tibetan_Lhasa	-0.000835	0.000361	-2.31	400566
Yi_HGDP	Nepal_Samdzong_1500BP	Tibetan_Lhasa	-0.001143	0.000506	-2.26	394039
Naxi_HGDP	Tibetan_Shannan	Tibetan_Lhasa	-0.000783	0.000347	-2.254	399457
Tibetan_Shannan	Xibo_HGDP	Tibetan_Lhasa	-0.000812	0.000368	-2.207	400682
Mongolia_EIA_7_Xiongnu	Nepal_Samdzong_1500BP	Tibetan_Lhasa	-0.002328	0.001076	-2.163	277961
Han_Beijing1K	Tibetan_Shannan	Tibetan_Lhasa	-0.000669	0.000311	-2.147	418587
Tibetan_Chamdo	Tibetan_Shannan	Tibetan_Lhasa	-0.000714	0.000337	-2.121	400239
Naxi_HGDP	Nepal_Samdzong_1500BP	Tibetan_Lhasa	-0.001045	0.000494	-2.116	392662
Tibetan_Shannan	Mongolia_EIA_1_SlabGrave	Tibetan_Lhasa	-0.000777	0.00037	-2.101	392872
Xibo_HGDP	Nepal_Samdzong_1500BP	Tibetan_Lhasa	-0.001167	0.000556	-2.099	393457
Buryat_Bohansky	Tibetan_Shannan	Tibetan_Lhasa	-0.000842	0.000408	-2.066	399491
Japanese_Tokyo1K	Tibetan_Shannan	Tibetan_Lhasa	-0.000652	0.000319	-2.047	415593
Tibetan_Shannan	Khakass_Kachins	Tibetan_Lhasa	-0.000803	0.000393	-2.043	408825
Tibetan_Shannan	Mongolia_EBA_1_Ulgii	Tibetan_Lhasa	-0.000977	0.000479	-2.04	362449
Tibetan_Shannan	Mongolia_EIA_8	Tibetan_Lhasa	-0.001434	0.000705	-2.033	293085
Nanai	Nepal_Samdzong_1500BP	Tibetan_Lhasa	-0.001122	0.000557	-2.015	392874
LaChi	Tibetan_Shannan	Tibetan_Lhasa	-0.000831	0.000423	-1.964	398171
Tibetan_Shannan	Tanshishan_LN	Tibetan_Lhasa	-0.001279	0.000657	-1.947	159418
Tibetan_Shannan	Nganasan	Tibetan_Lhasa	-0.000811	0.000417	-1.946	410394
Tibetan_Chamdo	Nepal_Chokhopani_2700BP	Tibetan_Lhasa	-0.001264	0.000657	-1.924	392448
Muong	Tibetan_Shannan	Tibetan_Lhasa	-0.000772	0.000404	-1.908	403096
Tibetan_Shannan	Mongolia_N_North	Tibetan_Lhasa	-0.000837	0.00044	-1.902	379467
Eskimo_ChaplinSireniki	Tibetan_Shannan	Tibetan_Lhasa	-0.000889	0.000467	-1.902	399884
Han_Jiangsu	Tibetan_Shannan	Tibetan_Lhasa	-0.000697	0.000371	-1.88	397476
Tibetan_Shannan	Boisman_MN	Tibetan_Lhasa	-0.000863	0.000461	-1.873	367858
Baoan_Jishishan	Nepal_Samdzong_1500BP	Tibetan_Lhasa	-0.000962	0.000514	-1.873	402062
Tibetan_Shannan	Mongolia_MBA_1_Munkhkhairkhan	Tibetan_Lhasa	-0.001024	0.000551	-1.859	361066
Han_SichuanHO	Tibetan_Shannan	Tibetan_Lhasa	-0.000705	0.00038	-1.855	398438
Japanese_HGDP	Nepal_Samdzong_1500BP	Tibetan_Lhasa	-0.000903	0.000488	-1.849	407234
Tibetan_Shannan	Banlashan_MN	Tibetan_Lhasa	-0.001131	0.000614	-1.843	388694
PaThen	Nepal_Samdzong_1500BP	Tibetan_Lhasa	-0.00112	0.000611	-1.832	390621
Tibetan_Shannan	Tujia_HGDP	Tibetan_Lhasa	-0.000644	0.000354	-1.821	401095
Tibetan_Shannan	Boshan_EN	Tibetan_Lhasa	-0.001255	0.000699	-1.796	356374
Tibetan_Shannan	Yi_HGDP	Tibetan_Lhasa	-0.00061	0.00034	-1.793	399902
Haojiatai_LBIA	Nepal_Samdzong_1500BP	Tibetan_Lhasa	-0.001959	0.001102	-1.778	296150
Mongolia_LBA_1_MongunTaiga	Nepal_Chokhopani_2700BP	Tibetan_Lhasa	-0.00342	0.001939	-1.764	177232
Dong_Guizhou	Nepal_Samdzong_1500BP	Tibetan_Lhasa	-0.000938	0.000537	-1.746	400061
Han_Shandong	Nepal_Samdzong_1500BP	Tibetan_Lhasa	-0.000881	0.000508	-1.736	394488
Ulchi	Nepal_Samdzong_1500BP	Tibetan_Lhasa	-0.000934	0.000538	-1.736	405976
Tay	Tibetan_Shannan	Tibetan_Lhasa	-0.00066	0.000384	-1.717	400733
Qiang_Daofu	Nepal_Mebrak_2125BP	Tibetan_Lhasa	-0.001223	0.000719	-1.701	270788
Tujia_HGDP	Nepal_Samdzong_1500BP	Tibetan_Lhasa	-0.000915	0.00054	-1.694	394987
Han_SouthChina1K	Tibetan_Shannan	Tibetan_Lhasa	-0.00054	0.000319	-1.694	416426
Tibetan_Shannan	Oroqen_HGDP	Tibetan_Lhasa	-0.000634	0.000375	-1.691	402465
PaThen	Tibetan_Shannan	Tibetan_Lhasa	-0.000683	0.000405	-1.685	397751
Tibetan_Shannan	Taiwan_Hanben	Tibetan_Lhasa	-0.000655	0.00039	-1.681	411027
Tibetan_Shannan	Luoheguxiang_LBIA	Tibetan_Lhasa	-0.000916	0.000553	-1.657	358951
Tibetan_Chamdo	Tibetan_Shigatse	Tibetan_Lhasa	-0.000518	0.000316	-1.638	400905
Kinh_HoChiMinh1K	Tibetan_Shannan	Tibetan_Lhasa	-0.000547	0.000334	-1.636	422640
Tibetan_Nagqu	Nepal_Mebrak_2125BP	Tibetan_Lhasa	-0.001232	0.000758	-1.625	267474
Tibetan_Gannan	Nepal_Samdzong_1500BP	Tibetan_Lhasa	-0.000921	0.000567	-1.624	391388
Hezhen_HGDP	Nepal_Samdzong_1500BP	Tibetan_Lhasa	-0.000876	0.000541	-1.62	393471
Oroqen_HGDP	Nepal_Samdzong_1500BP	Tibetan_Lhasa	-0.00088	0.000546	-1.611	396107
Tibetan_Chamdo	Russia_North_Caucasus	Tibetan_Lhasa	-0.000911	0.000568	-1.604	319276
Mang	Tibetan_Shannan	Tibetan_Lhasa	-0.000675	0.000423	-1.596	398346
Tibetan_Shannan	Wuzhuangguoliang	Tibetan_Lhasa	-0.001225	0.000769	-1.593	55753
Tibetan_Shannan	Mongolia_LBA_1_MongunTaiga	Tibetan_Lhasa	-0.001192	0.000762	-1.565	187130
Tibetan_Shannan	Ekven_IA	Tibetan_Lhasa	-0.000764	0.000491	-1.554	396271
Tibetan_Shannan	Jinchankou_LN	Tibetan_Lhasa	-0.001134	0.00073	-1.553	277306
Buryat_Bohansky	Nepal_Mebrak_2125BP	Tibetan_Lhasa	-0.001499	0.00098	-1.53	266872
Tibetan_Xunhua	Nepal_Mebrak_2125BP	Tibetan_Lhasa	-0.001498	0.000981	-1.527	263012
Tibetan_Xinlong	Nepal_Mebrak_2125BP	Tibetan_Lhasa	-0.001106	0.000727	-1.52	271045
Daur_HGDP	Nepal_Samdzong_1500BP	Tibetan_Lhasa	-0.000787	0.000519	-1.517	397286
Tibetan_Shannan	Wadian_LN	Tibetan_Lhasa	-0.000859	0.00057	-1.506	388579
Koryak	Tibetan_Shannan	Tibetan_Lhasa	-0.000713	0.000474	-1.503	399967
Tibetan_Shannan	Russia_OldBeringSea_Ekven	Tibetan_Lhasa	-0.000686	0.000458	-1.499	396014
Kinh_Vietnam	Tibetan_Shannan	Tibetan_Lhasa	-0.000545	0.000364	-1.494	403671
Nung	Tibetan_Shannan	Tibetan_Lhasa	-0.000562	0.000377	-1.49	401662
Tibetan_Shannan	Salar_Xunhua	Tibetan_Lhasa	-0.000532	0.000359	-1.483	409317
Mongolia_LBA_1_MongunTaiga	Nepal_Mebrak_2125BP	Tibetan_Lhasa	-0.002946	0.001998	-1.475	126468
Tibetan_Nagqu	Mongolia_Chalcolithic_1_Afanasievo	Tibetan_Lhasa	-0.00111	0.000755	-1.47	297201
Maonan_Huanjiang	Tibetan_Shannan	Tibetan_Lhasa	-0.000552	0.000376	-1.467	406329
Jinchankou_LN	Mongolia_Chalcolithic_1_Afanasievo	Tibetan_Lhasa	-0.002735	0.001872	-1.462	204571
Tibetan_Xinlong	Nepal_Samdzong_1500BP	Tibetan_Lhasa	-0.000741	0.000509	-1.457	395823
Tibetan_Shannan	Russia_Shamanka_EBA	Tibetan_Lhasa	-0.000775	0.000536	-1.447	355541
Buryat_Zakamensky	Tibetan_Shannan	Tibetan_Lhasa	-0.00059	0.000408	-1.444	404191
Tibetan_Shannan	Khakass_Sagai	Tibetan_Lhasa	-0.000548	0.000386	-1.419	418332
Mongolia_EIA_7_Xiongnu	Nepal_Mebrak_2125BP	Tibetan_Lhasa	-0.002571	0.00182	-1.412	193128
Tibetan_Shannan	Hezhen_HGDP	Tibetan_Lhasa	-0.000542	0.000383	-1.412	400275
Tibetan_Shannan	Haojiatai_LBIA	Tibetan_Lhasa	-0.000958	0.000678	-1.411	308902
Mongolia_EIA_8	Nepal_Samdzong_1500BP	Tibetan_Lhasa	-0.001504	0.001069	-1.407	280986
Tibetan_Chamdo	Nepal_Mebrak_2125BP	Tibetan_Lhasa	-0.000968	0.00069	-1.404	270660
Han_Jiangsu	Nepal_Samdzong_1500BP	Tibetan_Lhasa	-0.000775	0.000562	-1.378	389571
Tibetan_Shannan	Kirghiz	Tibetan_Lhasa	-0.000588	0.000427	-1.378	403997
Dungan	Tibetan_Shannan	Tibetan_Lhasa	-0.000441	0.000325	-1.357	414223
Tibetan_Shannan	Vietnam_Lahu	Tibetan_Lhasa	-0.000514	0.000382	-1.347	399268
Banlashan_MN	Nepal_Mebrak_2125BP	Tibetan_Lhasa	-0.001925	0.001433	-1.343	254429
Tibetan_Shannan	Mongolia_Medieval	Tibetan_Lhasa	-0.001006	0.000749	-1.342	197565
Russia_EBA_Yamnaya_Kalmykia	Jinchankou_LN	Tibetan_Lhasa	-0.001939	0.001446	-1.341	266271
Daur_HGDP	Tibetan_Shannan	Tibetan_Lhasa	-0.000488	0.000364	-1.338	403190
Han_Fujian	Tibetan_Shannan	Tibetan_Lhasa	-0.000566	0.000424	-1.335	396042
Han_Shanxi	Tibetan_Shannan	Tibetan_Lhasa	-0.000502	0.000378	-1.328	399485
Han_Shanghai	Tibetan_Shannan	Tibetan_Lhasa	-0.000679	0.000514	-1.323	391455
Dong_Hunan	Nepal_Samdzong_1500BP	Tibetan_Lhasa	-0.000739	0.000562	-1.316	391030
Tibetan_Shigatse	Mongolia_EIA_2	Tibetan_Lhasa	-0.000981	0.000746	-1.315	296206
Ingushian	Jinchankou_LN	Tibetan_Lhasa	-0.001521	0.001159	-1.312	301314
Tibetan_Shannan	Evenk_FarEast	Tibetan_Lhasa	-0.000695	0.000535	-1.299	390616
Shimao_LN	Nepal_Samdzong_1500BP	Tibetan_Lhasa	-0.001049	0.000808	-1.298	371792
Tibetan_Shigatse	Kirghiz	Tibetan_Lhasa	-0.000562	0.000433	-1.298	404975
Mulam_Luocheng	Tibetan_Shannan	Tibetan_Lhasa	-0.000475	0.000366	-1.298	406667
Chukchi	Tibetan_Shannan	Tibetan_Lhasa	-0.000539	0.000418	-1.291	408250
XiongNu	Nepal_Samdzong_1500BP	Tibetan_Lhasa	-0.000965	0.000752	-1.284	378493
Han_Beijing1K	Nepal_Samdzong_1500BP	Tibetan_Lhasa	-0.000588	0.00046	-1.277	417535
Dongxiang_Linxia	Tibetan_Shannan	Tibetan_Lhasa	-0.000472	0.000374	-1.264	404939
Tibetan_Shigatse	Nanai	Tibetan_Lhasa	-0.000455	0.000361	-1.262	400368
Baoan_Jishishan	Tibetan_Shannan	Tibetan_Lhasa	-0.000422	0.000338	-1.249	407309
Miaozigou_MN	Nepal_Mebrak_2125BP	Tibetan_Lhasa	-0.002932	0.002351	-1.247	69949
Dongxiang_Linxia	Nepal_Samdzong_1500BP	Tibetan_Lhasa	-0.00068	0.000555	-1.224	398554
Tibetan_Yajiang	Nepal_Mebrak_2125BP	Tibetan_Lhasa	-0.000941	0.00077	-1.221	269391
Mongol_Zasagt	Nepal_Samdzong_1500BP	Tibetan_Lhasa	-0.00068	0.000559	-1.217	399663
Han_Fujian	Nepal_Samdzong_1500BP	Tibetan_Lhasa	-0.00077	0.000637	-1.209	387121
Tibetan_Nagqu	Tibetan_Shannan	Tibetan_Lhasa	-0.000423	0.000351	-1.205	397648
Tibetan_Shannan	Evenk_Transbaikal	Tibetan_Lhasa	-0.000506	0.000422	-1.199	402344
Japanese_Tokyo1K	Nepal_Samdzong_1500BP	Tibetan_Lhasa	-0.000557	0.000468	-1.191	413859
Tibetan_Chamdo	Russia_Afanasievo	Tibetan_Lhasa	-0.000598	0.000503	-1.188	425622
Tibetan_Shannan	Tubalar	Tibetan_Lhasa	-0.000455	0.000387	-1.176	427973
Russia_Late_Sarmatian	Jinchankou_LN	Tibetan_Lhasa	-0.001637	0.001393	-1.175	262798
TibetanHO_Yunnan	Nepal_Samdzong_1500BP	Tibetan_Lhasa	-0.000713	0.000609	-1.171	381887
Tibetan_Shannan	Dacaozi_IA	Tibetan_Lhasa	-0.000557	0.000477	-1.169	378261
Koryak	Nepal_Samdzong_1500BP	Tibetan_Lhasa	-0.000805	0.00069	-1.167	391737
Tibetan_Chamdo	Russia_Srubnaya	Tibetan_Lhasa	-0.000612	0.000529	-1.156	414522
Buryat_Ehirit	Nepal_Mebrak_2125BP	Tibetan_Lhasa	-0.001019	0.000885	-1.152	271397
Tatar_Zabolotniye	Nepal_Mebrak_2125BP	Tibetan_Lhasa	-0.001225	0.001068	-1.147	275050
Tibetan_Nagqu	Nepal_Chokhopani_2700BP	Tibetan_Lhasa	-0.000873	0.000765	-1.14	387866
Eskimo_Naukan	Tibetan_Shannan	Tibetan_Lhasa	-0.00051	0.000448	-1.138	400463
Tibetan_Shannan	Tibetan_Xinlong	Tibetan_Lhasa	-0.000389	0.000347	-1.122	401726
Dong_Guizhou	Tibetan_Shannan	Tibetan_Lhasa	-0.000399	0.000356	-1.122	405130
Miao_HGDP	Tibetan_Shannan	Tibetan_Lhasa	-0.000411	0.000367	-1.118	400688
LoLo	Tibetan_Shannan	Tibetan_Lhasa	-0.000464	0.000416	-1.114	398460
Tibetan_Shannan	Khovsgol_LBA	Tibetan_Lhasa	-0.000435	0.000391	-1.112	393127
Tibetan_Shannan	Russia_UstIda_EBA	Tibetan_Lhasa	-0.000608	0.000551	-1.103	291266
Tibetan_Shannan	Jiaozuoniecun_LBIA	Tibetan_Lhasa	-0.000634	0.000578	-1.097	359757
Buryat_Selenginsky	Tibetan_Shannan	Tibetan_Lhasa	-0.000445	0.000405	-1.097	402083
Ami	Tibetan_Shannan	Tibetan_Lhasa	-0.000472	0.000431	-1.096	399761
Chuvash	Nepal_Mebrak_2125BP	Tibetan_Lhasa	-0.001085	0.000996	-1.089	294545
Muong	Nepal_Samdzong_1500BP	Tibetan_Lhasa	-0.000629	0.000579	-1.086	397126
Tibetan_Shannan	Selkup	Tibetan_Lhasa	-0.000437	0.000406	-1.075	425394
Tibetan_Shigatse	Mongolia_BA_2	Tibetan_Lhasa	-0.000797	0.00075	-1.063	205130
Tibetan_Shannan	Mongolia_LBA_4_CenterWest	Tibetan_Lhasa	-0.000406	0.000384	-1.057	395643
Dao	Nepal_Samdzong_1500BP	Tibetan_Lhasa	-0.000596	0.000566	-1.054	395951
Tibetan_Shannan	Liangdao2_EN	Tibetan_Lhasa	-0.000723	0.000691	-1.047	328626
Mongol_Zasagt	Tibetan_Shannan	Tibetan_Lhasa	-0.000378	0.000362	-1.044	405757
Evenk_FarEast	Nepal_Samdzong_1500BP	Tibetan_Lhasa	-0.000831	0.000797	-1.043	377657
Adygei	Tibetan_Chamdo	Tibetan_Lhasa	-0.000495	0.000475	-1.043	443519
Tibetan_Shannan	Wuqi_EN	Tibetan_Lhasa	-0.000938	0.000906	-1.035	75906
Tibetan_Shannan	Mongolia_Chalcolithic_2_Afanasievo	Tibetan_Lhasa	-0.00073	0.000705	-1.035	281452
Russia_Srubnaya	Jinchankou_LN	Tibetan_Lhasa	-0.00132	0.001278	-1.033	286679
Tibetan_Gangcha	Nepal_Samdzong_1500BP	Tibetan_Lhasa	-0.000459	0.000445	-1.033	409922
Shimao_LN	Nepal_Mebrak_2125BP	Tibetan_Lhasa	-0.001381	0.001337	-1.032	253388
Tibetan_Gangcha	Nepal_Mebrak_2125BP	Tibetan_Lhasa	-0.000665	0.000647	-1.029	281451
Tibetan_Shannan	TibetanHO_Yunnan	Tibetan_Lhasa	-0.000454	0.000441	-1.029	393080
Tu_HGDP	Nepal_Samdzong_1500BP	Tibetan_Lhasa	-0.000528	0.000513	-1.029	400174
Cong	Tibetan_Shannan	Tibetan_Lhasa	-0.000393	0.000382	-1.029	402115
Tibetan_Shannan	Mongolia_MBA_2_Munkhkhairkhan	Tibetan_Lhasa	-0.000736	0.000718	-1.026	305075
Buryat_Ehirit	Tibetan_Shannan	Tibetan_Lhasa	-0.000402	0.000392	-1.026	403812
Tibetan_Shannan	Russia_Bolshoy	Tibetan_Lhasa	-0.000531	0.000519	-1.024	365511
Zhalainuoer_EN	Nepal_Mebrak_2125BP	Tibetan_Lhasa	-0.002862	0.002801	-1.022	46805
BoY	Tibetan_Shannan	Tibetan_Lhasa	-0.000423	0.000414	-1.022	400786
Tibetan_Chamdo	Russia_EBA_Yamnaya_Kalmykia	Tibetan_Lhasa	-0.000581	0.00057	-1.019	390390
Dacaozi_IA	Nepal_Samdzong_1500BP	Tibetan_Lhasa	-0.000809	0.000796	-1.017	363725
Ket	Tibetan_Shannan	Tibetan_Lhasa	-0.000421	0.000418	-1.008	415968
Kankanaey	Tibetan_Shannan	Tibetan_Lhasa	-0.000437	0.000434	-1.007	397220
Tibetan_Shigatse	Xibo_HGDP	Tibetan_Lhasa	-0.000365	0.000363	-1.006	401534
Miaozigou_MN	Nepal_Samdzong_1500BP	Tibetan_Lhasa	-0.001397	0.001392	-1.004	101304
Tibetan_Chamdo	Russia_EBA_Yamnaya_Samara	Tibetan_Lhasa	-0.000542	0.000544	-0.997	404316
Buryat_Zakamensky	Nepal_Samdzong_1500BP	Tibetan_Lhasa	-0.000579	0.000581	-0.996	397000
LoLo	Nepal_Samdzong_1500BP	Tibetan_Lhasa	-0.00062	0.000623	-0.995	391499
Tibetan_Shannan	Xiaojingshan_EN	Tibetan_Lhasa	-0.000596	0.000601	-0.992	218668
Dai_Xishuangbanna1k	Tibetan_Shannan	Tibetan_Lhasa	-0.000337	0.00034	-0.991	417526
Tibetan_Chamdo	Russia_Poltavka	Tibetan_Lhasa	-0.000543	0.000554	-0.98	402377
Japanese_HGDP	Tibetan_Shannan	Tibetan_Lhasa	-0.000326	0.000332	-0.98	409988
Mongolia_Chalcolithic_1_Afanasievo	Nepal_Mebrak_2125BP	Tibetan_Lhasa	-0.001665	0.001707	-0.976	199966
Tibetan_Shannan	Shirenzigou_IA	Tibetan_Lhasa	-0.000574	0.000589	-0.975	280473
Chuanyun_H	Nepal_Chokhopani_2700BP	Tibetan_Lhasa	-0.002088	0.002152	-0.97	119507
Abkhasian	Jinchankou_LN	Tibetan_Lhasa	-0.001177	0.001216	-0.968	301808
Kurd	Tibetan_Chamdo	Tibetan_Lhasa	-0.00049	0.000506	-0.967	427080
BoY	Nepal_Samdzong_1500BP	Tibetan_Lhasa	-0.000607	0.000631	-0.962	392891
Mongolia_EIA_2	Nepal_Mebrak_2125BP	Tibetan_Lhasa	-0.001822	0.001903	-0.958	197041
Mogolian_HGDP	Tibetan_Shannan	Tibetan_Lhasa	-0.000367	0.000384	-0.956	400046
Tibetan_Shannan	Altaian_Chelkans	Tibetan_Lhasa	-0.000423	0.000442	-0.956	409476
Yugur_Sunan	Nepal_Samdzong_1500BP	Tibetan_Lhasa	-0.000477	0.000499	-0.955	407736
Muong	Tibetan_Shigatse	Tibetan_Lhasa	-0.000367	0.000386	-0.95	403806
Qiang_Daofu	Tibetan_Shannan	Tibetan_Lhasa	-0.000319	0.000336	-0.949	400925
Tibetan_Shigatse	Suogang_LN	Tibetan_Lhasa	-0.001088	0.00115	-0.946	30250
Kinh_Vietnam	Nepal_Samdzong_1500BP	Tibetan_Lhasa	-0.000512	0.000543	-0.943	398695
Mongolia_EIA_6_Pazyryk	Nepal_Mebrak_2125BP	Tibetan_Lhasa	-0.001708	0.001827	-0.935	197225
Tibetan_Chamdo	Mongolia_Chalcolithic_1_Afanasievo	Tibetan_Lhasa	-0.000676	0.000724	-0.933	300343
Miao_HGDP	Nepal_Samdzong_1500BP	Tibetan_Lhasa	-0.000513	0.000553	-0.928	394486
TibetanHO_Yunnan	Nepal_Mebrak_2125BP	Tibetan_Lhasa	-0.000903	0.000974	-0.927	260757
Nivkh	Tibetan_Shannan	Tibetan_Lhasa	-0.000403	0.000436	-0.923	397799
Tibetan_Chamdo	Russia_Steppe_Maikop	Tibetan_Lhasa	-0.000527	0.000575	-0.918	365884
Salar_Xunhua	Nepal_Samdzong_1500BP	Tibetan_Lhasa	-0.000475	0.000518	-0.917	403910
Kalmyk	Tibetan_Shannan	Tibetan_Lhasa	-0.000326	0.00036	-0.906	413661
Qiang_Danba	Nepal_Chokhopani_2700BP	Tibetan_Lhasa	-0.000672	0.000746	-0.901	389460
Naxi_HGDP	Tibetan_Shigatse	Tibetan_Lhasa	-0.00031	0.000346	-0.896	400204
Russia_MLBA_Sintashta	Jinchankou_LN	Tibetan_Lhasa	-0.001071	0.001196	-0.895	295937
Tibetan_Shannan	Zhalainuoer_EN	Tibetan_Lhasa	-0.000861	0.000964	-0.893	70496
Buryat_Aginsky	Tibetan_Shannan	Tibetan_Lhasa	-0.000333	0.000373	-0.891	412296
Abkhasian	Tibetan_Chamdo	Tibetan_Lhasa	-0.000448	0.000502	-0.891	430632
Tajik	Tibetan_Chamdo	Tibetan_Lhasa	-0.000418	0.000477	-0.877	427001
Circassian	Tibetan_Chamdo	Tibetan_Lhasa	-0.000413	0.000472	-0.876	428222
Russia_EBA_Yamnaya_Kalmykia	Miaozigou_MN	Tibetan_Lhasa	-0.001493	0.001718	-0.869	102255
Longtoushan_BA	Nepal_Samdzong_1500BP	Tibetan_Lhasa	-0.0009	0.001035	-0.869	211005
Vietnamese	Tibetan_Shannan	Tibetan_Lhasa	-0.000338	0.000391	-0.865	400767
Maonan_Huanjiang	Nepal_Samdzong_1500BP	Tibetan_Lhasa	-0.000465	0.000539	-0.863	401710
Yugur_Sunan	Tibetan_Shannan	Tibetan_Lhasa	-0.000278	0.000323	-0.86	411081
Ulchi	Nepal_Mebrak_2125BP	Tibetan_Lhasa	-0.000681	0.000793	-0.859	278445
Yakut_HGDP	Nepal_Samdzong_1500BP	Tibetan_Lhasa	-0.000475	0.000554	-0.858	413328
Tibetan_Gannan	Tibetan_Shigatse	Tibetan_Lhasa	-0.000324	0.000378	-0.857	400913
Sila	Nepal_Samdzong_1500BP	Tibetan_Lhasa	-0.000516	0.000603	-0.856	389691
Tibetan_Shannan	Suogang_LN	Tibetan_Lhasa	-0.001028	0.00121	-0.85	30120
Nivkh	Nepal_Samdzong_1500BP	Tibetan_Lhasa	-0.000524	0.000617	-0.85	390191
Han_SouthChina1K	Nepal_Samdzong_1500BP	Tibetan_Lhasa	-0.0004	0.000472	-0.849	415073
Thai	Tibetan_Shannan	Tibetan_Lhasa	-0.000305	0.00036	-0.847	416730
Russia_Lokomotiv_Eneolithic	Nepal_Mebrak_2125BP	Tibetan_Lhasa	-0.001134	0.00134	-0.846	226153
Lak	Jinchankou_LN	Tibetan_Lhasa	-0.000999	0.001184	-0.844	300004
Eskimo_ChaplinSireniki	Nepal_Samdzong_1500BP	Tibetan_Lhasa	-0.000603	0.000715	-0.844	391254
Tibetan_Nagqu	Mongolia_EIA_2	Tibetan_Lhasa	-0.000676	0.000803	-0.842	294108
Zhalainuoer_EN	Nepal_Chokhopani_2700BP	Tibetan_Lhasa	-0.002202	0.002617	-0.841	66773
Xiaogao_EN	Nepal_Mebrak_2125BP	Tibetan_Lhasa	-0.001428	0.001705	-0.837	222241
LaChi	Nepal_Samdzong_1500BP	Tibetan_Lhasa	-0.000522	0.000624	-0.837	390405
Ukrainian	Tibetan_Chamdo	Tibetan_Lhasa	-0.000412	0.000492	-0.837	441682
Tibetan_Shigatse	Mongolia_LBA_1_MongunTaiga	Tibetan_Lhasa	-0.00063	0.000754	-0.835	187839
Tibetan_Shannan	Shimao_LN	Tibetan_Lhasa	-0.00048	0.000577	-0.831	387004
Tibetan_Chamdo	Russia_Sintashta_MLBA	Tibetan_Lhasa	-0.000485	0.000585	-0.83	361972
Mongolia_EIA_8	Nepal_Mebrak_2125BP	Tibetan_Lhasa	-0.00149	0.001811	-0.823	195028
Atayal	Nepal_Samdzong_1500BP	Tibetan_Lhasa	-0.000576	0.000701	-0.821	388497
Mongol_Uuld	Nepal_Samdzong_1500BP	Tibetan_Lhasa	-0.000436	0.000533	-0.82	407955
Yumin_EN	Nepal_Chokhopani_2700BP	Tibetan_Lhasa	-0.001428	0.001744	-0.819	303100
Ukrainian	Jinchankou_LN	Tibetan_Lhasa	-0.00094	0.001152	-0.816	311637
Tibetan_Chamdo	Russia_Srubnaya_Alakul	Tibetan_Lhasa	-0.000414	0.000508	-0.815	417330
Tay	Nepal_Samdzong_1500BP	Tibetan_Lhasa	-0.000453	0.000557	-0.814	394757
Buryat_Aginsky	Nepal_Samdzong_1500BP	Tibetan_Lhasa	-0.000463	0.00057	-0.811	408069
Tibetan_Shannan	Tuvinian	Tibetan_Lhasa	-0.000287	0.000357	-0.806	421614
Tibetan_Shannan	Haminmangha_MN	Tibetan_Lhasa	-0.000573	0.000715	-0.801	235550
Tibetan_Shannan	Ulchi	Tibetan_Lhasa	-0.000295	0.00037	-0.799	409510
Evenk_Transbaikal	Nepal_Samdzong_1500BP	Tibetan_Lhasa	-0.000484	0.000614	-0.789	395107
Bashkir_north	Nepal_Mebrak_2125BP	Tibetan_Lhasa	-0.000727	0.000924	-0.786	298201
Nganasan	Nepal_Samdzong_1500BP	Tibetan_Lhasa	-0.000492	0.000626	-0.786	405541
Tibetan_Chamdo	Kumyk	Tibetan_Lhasa	-0.000385	0.000493	-0.781	429080
Tibetan_Chamdo	Russia_MLBA_Sintashta	Tibetan_Lhasa	-0.000392	0.000504	-0.778	424276
Nung	Nepal_Samdzong_1500BP	Tibetan_Lhasa	-0.000432	0.000565	-0.765	396042
Russian_HGDP	Tibetan_Chamdo	Tibetan_Lhasa	-0.000357	0.000468	-0.761	438828
Kubachinian	Tibetan_Chamdo	Tibetan_Lhasa	-0.000399	0.00053	-0.753	420064
Han_Henan	Tibetan_Shannan	Tibetan_Lhasa	-0.000309	0.000411	-0.752	395959
Tibetan_Gangcha	Tibetan_Shannan	Tibetan_Lhasa	-0.000226	0.0003	-0.752	411947
Tibetan_Shigatse	Mongolia_EIA_6_Pazyryk	Tibetan_Lhasa	-0.000526	0.0007	-0.751	295996
Buryat_Ehirit	Nepal_Samdzong_1500BP	Tibetan_Lhasa	-0.000452	0.000605	-0.747	396564
Mongolia_N_East	Nepal_Samdzong_1500BP	Tibetan_Lhasa	-0.000675	0.000912	-0.74	335891
Russia_EBA_Yamnaya_Samara	Jinchankou_LN	Tibetan_Lhasa	-0.000952	0.001287	-0.739	278018
Mongolia_Medieval	Nepal_Samdzong_1500BP	Tibetan_Lhasa	-0.000915	0.001241	-0.738	189809
Han_Chongqing	Tibetan_Shigatse	Tibetan_Lhasa	-0.000325	0.000441	-0.738	394387
Tibetan_Shannan	Haojiatai_LN	Tibetan_Lhasa	-0.000417	0.000569	-0.733	291049
Korean	Tibetan_Shannan	Tibetan_Lhasa	-0.000279	0.000382	-0.732	396633
Mongolia_IA_Xianbei	Nepal_Chokhopani_2700BP	Tibetan_Lhasa	-0.001285	0.001761	-0.73	287067
Eskimo_ChaplinSireniki	Nepal_Chokhopani_2700BP	Tibetan_Lhasa	-0.000738	0.001013	-0.728	387969
Rai_Nepal	Tibetan_Shannan	Tibetan_Lhasa	-0.000305	0.00042	-0.727	395935
Khakass_Sagai	Nepal_Mebrak_2125BP	Tibetan_Lhasa	-0.000634	0.000876	-0.725	283761
Tibetan_Shannan	Chuanyun_H	Tibetan_Lhasa	-0.000563	0.000784	-0.719	126436
Kubachinian	Miaozigou_MN	Tibetan_Lhasa	-0.000955	0.001332	-0.717	111689
Jinchankou_LN	Nepal_Samdzong_1500BP	Tibetan_Lhasa	-0.000802	0.001124	-0.714	265659
Tibetan_Shigatse	Boisman_MN	Tibetan_Lhasa	-0.000311	0.000436	-0.713	368978
Tibetan_Shannan	Nanai	Tibetan_Lhasa	-0.000255	0.000358	-0.712	399678
Mongol_Sainnoyon	Tibetan_Shannan	Tibetan_Lhasa	-0.000261	0.000371	-0.705	407501
Tibetan_Shannan	Mongolia_LBA_2_Ulaanzukh	Tibetan_Lhasa	-0.00033	0.000474	-0.697	349531
Khamnegan	Nepal_Samdzong_1500BP	Tibetan_Lhasa	-0.000387	0.000556	-0.695	399617
Tibetan_Shannan	Xiaogao_EN	Tibetan_Lhasa	-0.000479	0.000693	-0.691	336493
Tibetan_Shigatse	Khakass_Kachins	Tibetan_Lhasa	-0.000266	0.000385	-0.69	409579
Haminmangha_MN	Nepal_Samdzong_1500BP	Tibetan_Lhasa	-0.000799	0.001164	-0.686	225598
Mongol_Minorities	Nepal_Samdzong_1500BP	Tibetan_Lhasa	-0.000352	0.000513	-0.686	406700
Tlingit	Tibetan_Shannan	Tibetan_Lhasa	-0.000346	0.000505	-0.684	408583
Murut	Tibetan_Shannan	Tibetan_Lhasa	-0.000287	0.000422	-0.681	399468
Tibetan_Shannan	Altaian	Tibetan_Lhasa	-0.000242	0.000354	-0.681	431630
Mongolia_MBA_2_Munkhkhairkhan	Nepal_Mebrak_2125BP	Tibetan_Lhasa	-0.001218	0.001794	-0.679	203702
Han_SichuanHO	Nepal_Samdzong_1500BP	Tibetan_Lhasa	-0.000386	0.000568	-0.679	390778
Gelao_Longlin	Nepal_Samdzong_1500BP	Tibetan_Lhasa	-0.000385	0.000569	-0.677	395246
Tibetan_Shannan	Tibetan_Xunhua	Tibetan_Lhasa	-0.000312	0.000461	-0.676	396291
Wadian_LN	Nepal_Samdzong_1500BP	Tibetan_Lhasa	-0.000574	0.000852	-0.674	373479
Han_Henan	Nepal_Samdzong_1500BP	Tibetan_Lhasa	-0.000422	0.000626	-0.673	386648
Tibetan_Shigatse	Jinchankou_LN	Tibetan_Lhasa	-0.000485	0.000725	-0.67	278264
Dai_HGDP	Nepal_Samdzong_1500BP	Tibetan_Lhasa	-0.000376	0.000567	-0.663	396119
Tibetan_Shannan	Russia_Shamanka_Eneolithic	Tibetan_Lhasa	-0.000273	0.000413	-0.663	400185
Tibetan_Shannan	Lajia_LN	Tibetan_Lhasa	-0.000311	0.000474	-0.657	386413
Thai	Nepal_Samdzong_1500BP	Tibetan_Lhasa	-0.000333	0.000519	-0.643	414244
Gelao_Longlin	Tibetan_Shannan	Tibetan_Lhasa	-0.000248	0.000386	-0.642	401637
Han_Chongqing	Nepal_Samdzong_1500BP	Tibetan_Lhasa	-0.000455	0.000716	-0.636	381404
Lak	Tibetan_Chamdo	Tibetan_Lhasa	-0.000324	0.00051	-0.635	427842
Tibetan_Nagqu	Shirenzigou_IA_W	Tibetan_Lhasa	-0.000475	0.000759	-0.626	121951
Tibetan_Shigatse	Shimao_LN	Tibetan_Lhasa	-0.000326	0.00052	-0.626	388379
Russia_Afanasievo	Jinchankou_LN	Tibetan_Lhasa	-0.000772	0.001237	-0.624	297107
Tibetan_Shigatse	Nepal_Chokhopani_2700BP	Tibetan_Lhasa	-0.000423	0.00068	-0.622	390687
Tibetan_Shannan	UstBelaya_EBA	Tibetan_Lhasa	-0.000298	0.000484	-0.617	385843
Adygei	Jinchankou_LN	Tibetan_Lhasa	-0.000671	0.001093	-0.614	313800
Kinh_HGDP	Tibetan_Shannan	Tibetan_Lhasa	-0.000235	0.000386	-0.609	402451
Buryat_Bohansky	Nepal_Samdzong_1500BP	Tibetan_Lhasa	-0.000383	0.00063	-0.608	390372
Zhuang_Guangxi	Tibetan_Shannan	Tibetan_Lhasa	-0.000228	0.000375	-0.608	408264
Russian_Pinezhsky	Jinchankou_LN	Tibetan_Lhasa	-0.00071	0.00117	-0.607	291161
Tibetan_Shannan	Mongolia_BA_1	Tibetan_Lhasa	-0.000413	0.000681	-0.607	308010
Circassian	Jinchankou_LN	Tibetan_Lhasa	-0.000703	0.001161	-0.605	300429
Tamang_Nepal	Tibetan_Shannan	Tibetan_Lhasa	-0.000223	0.00037	-0.603	403606
Russian	Jinchankou_LN	Tibetan_Lhasa	-0.000677	0.001126	-0.601	318360
Tibetan_Shigatse	Hezhen_HGDP	Tibetan_Lhasa	-0.00022	0.000366	-0.601	401432
Tibetan_Shannan	Mongolia_BA_2	Tibetan_Lhasa	-0.00045	0.000753	-0.597	204223
Tibetan_Gannan	Nepal_Mebrak_2125BP	Tibetan_Lhasa	-0.000492	0.000825	-0.597	267680
Mang	Tibetan_Shigatse	Tibetan_Lhasa	-0.000246	0.000416	-0.591	399288
Ami	Nepal_Samdzong_1500BP	Tibetan_Lhasa	-0.000371	0.000629	-0.59	392157
Tibetan_Shannan	Tofalar	Tibetan_Lhasa	-0.000247	0.00042	-0.589	407669
Russia_Poltavka	Jinchankou_LN	Tibetan_Lhasa	-0.000827	0.001413	-0.585	275891
Sherpa_Nepal	Mongolia_EIA_2	Tibetan_Lhasa	-0.000574	0.000982	-0.584	287891
Oroqen_HGDP	Nepal_Mebrak_2125BP	Tibetan_Lhasa	-0.000484	0.00083	-0.583	271283
Mongol_Uuld	Tibetan_Shannan	Tibetan_Lhasa	-0.000206	0.000356	-0.58	412302
Tibetan_Shigatse	Tujia_HGDP	Tibetan_Lhasa	-0.00021	0.000362	-0.579	401793
Kurd	Jinchankou_LN	Tibetan_Lhasa	-0.000713	0.001233	-0.578	298868
Khamnegan	Nepal_Mebrak_2125BP	Tibetan_Lhasa	-0.000475	0.000832	-0.571	273599
Zhuang_Guangxi	Nepal_Samdzong_1500BP	Tibetan_Lhasa	-0.000304	0.000535	-0.569	404403
Chuanyun_H	Nepal_Mebrak_2125BP	Tibetan_Lhasa	-0.001281	0.002255	-0.568	84360
Cham	Nepal_Samdzong_1500BP	Tibetan_Lhasa	-0.000323	0.000571	-0.567	405431
Tibetan_Shigatse	Dacaozi_IA	Tibetan_Lhasa	-0.000283	0.000503	-0.563	379612
Miaozigou_MN	Mongolia_EBA_2_Chemurchek	Tibetan_Lhasa	-0.00108	0.001944	-0.556	90398
Kumyk	Miaozigou_MN	Tibetan_Lhasa	-0.000674	0.001218	-0.554	114814
Tajik_Mountain	Tibetan_Shigatse	Tibetan_Lhasa	-0.000256	0.000463	-0.554	429574
Russia_IA	Nepal_Mebrak_2125BP	Tibetan_Lhasa	-0.000593	0.001073	-0.553	264958
Tibetan_Shigatse	Evenk_FarEast	Tibetan_Lhasa	-0.000291	0.000526	-0.553	392029
Tibetan_Shannan	Dolgan	Tibetan_Lhasa	-0.000248	0.000449	-0.552	400987
UstBelaya_EBA	Nepal_Chokhopani_2700BP	Tibetan_Lhasa	-0.000668	0.001226	-0.545	367532
Russia_Caucasus_EBA_Yamnaya	Miaozigou_MN	Tibetan_Lhasa	-0.001018	0.001872	-0.544	80690
Tajik_Mountain	Jinchankou_LN	Tibetan_Lhasa	-0.000573	0.001054	-0.544	302842
Mongolia_MBA_1_Munkhkhairkhan	Nepal_Chokhopani_2700BP	Tibetan_Lhasa	-0.000793	0.001469	-0.54	343261
Han_Shanghai	Nepal_Mebrak_2125BP	Tibetan_Lhasa	-0.00062	0.001159	-0.535	257858
Evenk_Transbaikal	Nepal_Mebrak_2125BP	Tibetan_Lhasa	-0.000519	0.000973	-0.533	270264
Cong	Nepal_Samdzong_1500BP	Tibetan_Lhasa	-0.000312	0.000587	-0.532	396126
Russian	Tibetan_Chamdo	Tibetan_Lhasa	-0.000258	0.000487	-0.53	449520
Mongolia_Chalcolithic_2_Afanasievo	Nepal_Mebrak_2125BP	Tibetan_Lhasa	-0.000929	0.001758	-0.529	188553
Russia_Srubnaya_Alakul	Jinchankou_LN	Tibetan_Lhasa	-0.000665	0.00126	-0.528	288000
Dai_Xishuangbanna1k	Nepal_Samdzong_1500BP	Tibetan_Lhasa	-0.000259	0.000492	-0.527	415942
Tibetan_Shannan	Mongolia_LBA_5_CenterWest	Tibetan_Lhasa	-0.000311	0.000592	-0.525	373299
Tibetan_Shannan	Mongolia_EIA_4_Sagly	Tibetan_Lhasa	-0.00022	0.000419	-0.525	410009
Mongol_Minorities	Nepal_Mebrak_2125BP	Tibetan_Lhasa	-0.00041	0.000796	-0.515	278581
Tibetan_Shannan	Khakass_Koibals	Tibetan_Lhasa	-0.000216	0.000419	-0.515	404611
Tibetan_Shigatse	TibetanHO_Yunnan	Tibetan_Lhasa	-0.000214	0.000416	-0.514	394027
Tibetan_Nagqu	Suogang_LN	Tibetan_Lhasa	-0.000623	0.001226	-0.509	30074
Mongolia_EBA_1_Ulgii	Nepal_Chokhopani_2700BP	Tibetan_Lhasa	-0.000603	0.001188	-0.508	345647
Mongolia_EIA_1_SlabGrave	Nepal_Chokhopani_2700BP	Tibetan_Lhasa	-0.000437	0.000864	-0.506	379535
Tibetan_Shigatse	Russia_Shamanka_EBA	Tibetan_Lhasa	-0.000258	0.000517	-0.499	356846
Miaozigou_MN	Shirenzigou_IA_W	Tibetan_Lhasa	-0.00157	0.003155	-0.498	32609
Tibetan_Xunhua	Nepal_Samdzong_1500BP	Tibetan_Lhasa	-0.000338	0.000682	-0.496	385165
Tibetan_Chamdo	Russia_Alan	Tibetan_Lhasa	-0.000268	0.000545	-0.492	403117
Dungan	Nepal_Samdzong_1500BP	Tibetan_Lhasa	-0.000247	0.000505	-0.489	411206
Khamnegan	Tibetan_Shannan	Tibetan_Lhasa	-0.000183	0.000377	-0.486	405749
Hmong	Tibetan_Shannan	Tibetan_Lhasa	-0.000196	0.000404	-0.484	403468
Han_Zhejiang	Nepal_Samdzong_1500BP	Tibetan_Lhasa	-0.000295	0.000614	-0.481	386294
Baoan_Jishishan	Tibetan_Shigatse	Tibetan_Lhasa	-0.000159	0.000331	-0.481	407975
Bianbian_EN	Nepal_Chokhopani_2700BP	Tibetan_Lhasa	-0.000842	0.001753	-0.48	249509
Tibetan_Shigatse	Kumyk	Tibetan_Lhasa	-0.000246	0.000514	-0.479	428317
Eskimo_Naukan	Nepal_Samdzong_1500BP	Tibetan_Lhasa	-0.000352	0.000736	-0.478	392521
Tibetan_Yajiang	Nepal_Chokhopani_2700BP	Tibetan_Lhasa	-0.00036	0.000759	-0.474	390662
Tibetan_Shannan	Mongolia_EIA_2	Tibetan_Lhasa	-0.000357	0.000754	-0.473	294941
Tibetan_Shigatse	Yi_HGDP	Tibetan_Lhasa	-0.000163	0.000344	-0.473	401072
Tu_HGDP	Nepal_Mebrak_2125BP	Tibetan_Lhasa	-0.000347	0.000735	-0.472	274243
Kazakh	Nepal_Mebrak_2125BP	Tibetan_Lhasa	-0.000353	0.000759	-0.466	296863
Tibetan_Shannan	Yakut_HGDP	Tibetan_Lhasa	-0.000168	0.000362	-0.464	416243
Tibetan_Shannan	Qihe_EN	Tibetan_Lhasa	-0.00038	0.00082	-0.463	131004
Tibetan_Shannan	Bashkir_south	Tibetan_Lhasa	-0.000185	0.000401	-0.463	434946
Ingushian	Nepal_Mebrak_2125BP	Tibetan_Lhasa	-0.000515	0.001114	-0.462	291424
Han_Shandong	Tibetan_Shigatse	Tibetan_Lhasa	-0.000162	0.000353	-0.459	401329
Dongxiang_Linxia	Tibetan_Shigatse	Tibetan_Lhasa	-0.000171	0.000373	-0.459	405876
Tatar_Kazan	Nepal_Mebrak_2125BP	Tibetan_Lhasa	-0.000438	0.000963	-0.455	293679
Altaian	Nepal_Samdzong_1500BP	Tibetan_Lhasa	-0.000237	0.000521	-0.455	430495
Han_Shanghai	Nepal_Chokhopani_2700BP	Tibetan_Lhasa	-0.000526	0.001159	-0.454	373897
Tibetan_Shannan	Tibetan_Yajiang	Tibetan_Lhasa	-0.000164	0.000366	-0.449	400440
Tibetan_Shigatse	Taiwan_Hanben	Tibetan_Lhasa	-0.000174	0.000399	-0.435	411920
Abazin	Tibetan_Chamdo	Tibetan_Lhasa	-0.000209	0.00048	-0.435	426142
Cambodian	Nepal_Samdzong_1500BP	Tibetan_Lhasa	-0.000256	0.000591	-0.433	401267
Mongolia_EIA_1_SlabGrave	Nepal_Mebrak_2125BP	Tibetan_Lhasa	-0.000388	0.0009	-0.432	262708
Shor_Mountain	Nepal_Mebrak_2125BP	Tibetan_Lhasa	-0.000412	0.000953	-0.432	274910
Jiaozuoniecun_LBIA	Nepal_Samdzong_1500BP	Tibetan_Lhasa	-0.000373	0.000863	-0.432	345552
Russia_North_Caucasus	Jinchankou_LN	Tibetan_Lhasa	-0.000631	0.001465	-0.431	219246
Haojiatai_LBIA	Nepal_Mebrak_2125BP	Tibetan_Lhasa	-0.000753	0.001752	-0.43	203901
Mogolian_HGDP	Nepal_Samdzong_1500BP	Tibetan_Lhasa	-0.000243	0.000565	-0.429	392188
Vietnam_Lahu	Nepal_Samdzong_1500BP	Tibetan_Lhasa	-0.000231	0.000545	-0.425	392763
Kinh_HGDP	Nepal_Mebrak_2125BP	Tibetan_Lhasa	-0.000364	0.000863	-0.422	270806
Tibetan_Chamdo	Russia_Late_Sarmatian	Tibetan_Lhasa	-0.000233	0.000554	-0.42	386910
Hmong	Nepal_Samdzong_1500BP	Tibetan_Lhasa	-0.000244	0.00058	-0.42	397883
Kankanaey	Nepal_Samdzong_1500BP	Tibetan_Lhasa	-0.000271	0.000651	-0.416	388916
Kumyk	Jinchankou_LN	Tibetan_Lhasa	-0.000487	0.001173	-0.415	300686
Tibetan_Chamdo	Mongolia_EBA_2_Chemurchek	Tibetan_Lhasa	-0.000254	0.000612	-0.415	340433
Ukrainian	Miaozigou_MN	Tibetan_Lhasa	-0.000495	0.001201	-0.413	119070
Boisman_MN	Nepal_Samdzong_1500BP	Tibetan_Lhasa	-0.00029	0.000701	-0.413	356047
She_HGDP	Tibetan_Shannan	Tibetan_Lhasa	-0.000159	0.000386	-0.411	399922
Banlashan_MN	Nepal_Chokhopani_2700BP	Tibetan_Lhasa	-0.000591	0.001445	-0.409	368504
TibetanHO_Yunnan	Nepal_Chokhopani_2700BP	Tibetan_Lhasa	-0.000396	0.000971	-0.408	378036
Buryat_Selenginsky	Tibetan_Shigatse	Tibetan_Lhasa	-0.000161	0.000399	-0.403	403059
Tibetan_Chamdo	Udmurt	Tibetan_Lhasa	-0.000177	0.00044	-0.403	424086
Tibetan_Shigatse	Tatar_Mishar	Tibetan_Lhasa	-0.000184	0.000457	-0.402	427661
Boshan_EN	Nepal_Samdzong_1500BP	Tibetan_Lhasa	-0.000447	0.00112	-0.4	341671
Mongolia_IA_Xianbei	Nepal_Samdzong_1500BP	Tibetan_Lhasa	-0.000463	0.00116	-0.399	291146
Mordovian	Jinchankou_LN	Tibetan_Lhasa	-0.00044	0.001102	-0.399	313647
Tibetan_Shannan	Yukagir	Tibetan_Lhasa	-0.000154	0.000386	-0.399	420714
Kinh_HoChiMinh1K	Nepal_Samdzong_1500BP	Tibetan_Lhasa	-0.000197	0.000494	-0.398	421596
Selkup	Nepal_Mebrak_2125BP	Tibetan_Lhasa	-0.000355	0.000899	-0.395	290096
Russia_BA_Okunevo	Nepal_Mebrak_2125BP	Tibetan_Lhasa	-0.000431	0.001096	-0.393	274207
Nung	Tibetan_Shigatse	Tibetan_Lhasa	-0.000143	0.000364	-0.393	402439
Abazin	Jinchankou_LN	Tibetan_Lhasa	-0.000439	0.001127	-0.389	298610
Tibetan_Chamdo	Veps	Tibetan_Lhasa	-0.000196	0.000506	-0.388	424960
Kinh_HGDP	Nepal_Samdzong_1500BP	Tibetan_Lhasa	-0.000218	0.000572	-0.381	395585
Tibetan_Shigatse	Mongolia_Chalcolithic_1_Afanasievo	Tibetan_Lhasa	-0.00027	0.00071	-0.38	299100
CoLao	Tibetan_Shannan	Tibetan_Lhasa	-0.000164	0.000431	-0.38	397755
Russia_Shamanka_EBA	Nepal_Mebrak_2125BP	Tibetan_Lhasa	-0.000505	0.001334	-0.379	233544
Dai_HGDP	Tibetan_Shannan	Tibetan_Lhasa	-0.000146	0.000386	-0.379	402311
Russia_Sintashta_MLBA	Jinchankou_LN	Tibetan_Lhasa	-0.000566	0.00157	-0.36	246392
Tibetan_Shannan	Even	Tibetan_Lhasa	-0.000142	0.000397	-0.357	416345
Tibetan_Nagqu	Tibetan_Shigatse	Tibetan_Lhasa	-0.00012	0.000337	-0.356	398787
Mongolia_EBA_1_Ulgii	Nepal_Mebrak_2125BP	Tibetan_Lhasa	-0.000438	0.001235	-0.355	240677
Tibetan_Shannan	Mongolia_EIA_7_Xiongnu	Tibetan_Lhasa	-0.00026	0.000732	-0.355	289623
Lak	Nepal_Mebrak_2125BP	Tibetan_Lhasa	-0.000384	0.001088	-0.353	290190
Tibetan_Shannan	Tatar_Siberian	Tibetan_Lhasa	-0.000138	0.000392	-0.351	431299
Veps	Miaozigou_MN	Tibetan_Lhasa	-0.000419	0.001209	-0.347	113617
Buryat_Duldurginsky	Tibetan_Shannan	Tibetan_Lhasa	-0.000145	0.000425	-0.34	399278
Tibetan_Shannan	Russia_Lokomotiv_Eneolithic	Tibetan_Lhasa	-0.000177	0.00053	-0.334	344632
Mongolia_LBA_2_Ulaanzukh	Nepal_Samdzong_1500BP	Tibetan_Lhasa	-0.000259	0.000784	-0.331	337011
Kabardinian	Jinchankou_LN	Tibetan_Lhasa	-0.000378	0.001145	-0.33	299007
Korean	Nepal_Samdzong_1500BP	Tibetan_Lhasa	-0.000195	0.000592	-0.33	388067
Tibetan_Chamdo	Mordovian	Tibetan_Lhasa	-0.000155	0.000468	-0.33	443413
Bianbian_EN	Nepal_Mebrak_2125BP	Tibetan_Lhasa	-0.0006	0.001827	-0.329	176362
Cham	Tibetan_Shannan	Tibetan_Lhasa	-0.000124	0.00038	-0.328	409862
Mongolia_EIA_6_Pazyryk	Nepal_Chokhopani_2700BP	Tibetan_Lhasa	-0.000582	0.0018	-0.323	279871
Khakass_Kachins	Nepal_Samdzong_1500BP	Tibetan_Lhasa	-0.000193	0.000599	-0.322	402801
Li_Hainan	Tibetan_Shannan	Tibetan_Lhasa	-0.00015	0.00047	-0.318	397425
Mongolia_Chalcolithic_2_Afanasievo	Nepal_Samdzong_1500BP	Tibetan_Lhasa	-0.000362	0.001149	-0.315	270261
Nivkh	Tibetan_Shigatse	Tibetan_Lhasa	-0.000131	0.000416	-0.315	398900
Nanai	Nepal_Mebrak_2125BP	Tibetan_Lhasa	-0.000265	0.000843	-0.314	269064
Han_Zhejiang	Tibetan_Shannan	Tibetan_Lhasa	-0.000122	0.0004	-0.306	395573
Buryat_Ehirit	Nepal_Chokhopani_2700BP	Tibetan_Lhasa	-0.000257	0.000843	-0.305	393628
Tibetan_Shannan	Kazakh	Tibetan_Lhasa	-0.000106	0.000351	-0.303	432980
Tibetan_Shannan	Tibetan_Shigatse	Tibetan_Lhasa	-0.0001	0.000334	-0.3	399204
Han_Shanghai	Nepal_Samdzong_1500BP	Tibetan_Lhasa	-0.000233	0.000783	-0.298	378218
Tibetan_Shigatse	Salar_Xunhua	Tibetan_Lhasa	-0.000104	0.000353	-0.294	410023
Tofalar	Nepal_Samdzong_1500BP	Tibetan_Lhasa	-0.000178	0.000611	-0.292	402084
Tibetan_Shigatse	Boshan_EN	Tibetan_Lhasa	-0.000201	0.000696	-0.289	357819
Russian_Pinezhsky	Nepal_Chokhopani_2700BP	Tibetan_Lhasa	-0.000353	0.001226	-0.288	408396
Tibetan_Shannan	Shirenzigou_IA_W	Tibetan_Lhasa	-0.000209	0.000731	-0.286	122261
Ingushian	Tibetan_Chamdo	Tibetan_Lhasa	-0.000142	0.000497	-0.286	429432
Han_Hubei	Tibetan_Shannan	Tibetan_Lhasa	-0.000112	0.000398	-0.282	395769
Tibetan_Shigatse	Ulchi	Tibetan_Lhasa	-9.7e-05	0.000347	-0.279	410224
Ossetian	Jinchankou_LN	Tibetan_Lhasa	-0.000312	0.001122	-0.278	307859
Han_Hubei	Nepal_Samdzong_1500BP	Tibetan_Lhasa	-0.000168	0.000606	-0.278	386499
Sherpa_Nepal	Zhalainuoer_EN	Tibetan_Lhasa	-0.000345	0.001254	-0.275	68742
Maonan_Huanjiang	Tibetan_Shigatse	Tibetan_Lhasa	-9.8e-05	0.000356	-0.275	406967
Mongolia_LBA_2_Ulaanzukh	Nepal_Mebrak_2125BP	Tibetan_Lhasa	-0.00032	0.001168	-0.274	232703
Longtoushan_BA	Nepal_Chokhopani_2700BP	Tibetan_Lhasa	-0.000459	0.001684	-0.272	208140
Lak	Nepal_Chokhopani_2700BP	Tibetan_Lhasa	-0.000325	0.001199	-0.271	420708
Mongolia_LBA_5_CenterWest	Nepal_Chokhopani_2700BP	Tibetan_Lhasa	-0.000397	0.00148	-0.268	356484
Tibetan_Shannan	Xiaowu_MN	Tibetan_Lhasa	-0.000176	0.000659	-0.267	383642
Suogang_LN	Nepal_Samdzong_1500BP	Tibetan_Lhasa	-0.000582	0.002188	-0.266	28933
LaChi	Tibetan_Shigatse	Tibetan_Lhasa	-0.000108	0.000408	-0.265	398888
Mlabri	Nepal_Samdzong_1500BP	Tibetan_Lhasa	-0.000229	0.000871	-0.262	376855
Bashkir_south	Nepal_Mebrak_2125BP	Tibetan_Lhasa	-0.00023	0.00089	-0.259	297921
Miao_HGDP	Tibetan_Shigatse	Tibetan_Lhasa	-9.2e-05	0.000357	-0.259	401586
Han_Guangdong	Tibetan_Shannan	Tibetan_Lhasa	-0.000103	0.0004	-0.257	399227
Tubalar	Nepal_Mebrak_2125BP	Tibetan_Lhasa	-0.000208	0.000823	-0.253	292463
Xiaowu_MN	Nepal_Samdzong_1500BP	Tibetan_Lhasa	-0.000267	0.001056	-0.253	367856
Han_Jiangsu	Nepal_Mebrak_2125BP	Tibetan_Lhasa	-0.000212	0.000839	-0.252	266485
Dongxiang_Linxia	Nepal_Mebrak_2125BP	Tibetan_Lhasa	-0.000203	0.000806	-0.251	273020
Russia_OldBeringSea_Ekven	Nepal_Mebrak_2125BP	Tibetan_Lhasa	-0.000273	0.001101	-0.248	264505
Tibetan_Shannan	Russia_BA_Okunevo	Tibetan_Lhasa	-0.000116	0.000469	-0.247	409781
Tibetan_Shigatse	Russia_OldBeringSea_Ekven	Tibetan_Lhasa	-0.000115	0.000466	-0.246	397224
Dao	Tibetan_Shannan	Tibetan_Lhasa	-9.4e-05	0.000387	-0.244	401721
Evenk_FarEast	Nepal_Chokhopani_2700BP	Tibetan_Lhasa	-0.000285	0.001177	-0.242	373340
Korean	Tibetan_Shigatse	Tibetan_Lhasa	-8.9e-05	0.000372	-0.24	397536
Russian_HGDP	Jinchankou_LN	Tibetan_Lhasa	-0.000267	0.001118	-0.239	309827
Tibetan_Chamdo	Karelian	Tibetan_Lhasa	-0.000116	0.00049	-0.237	432454
Tharu_Nepal	Tibetan_Shannan	Tibetan_Lhasa	-9.7e-05	0.000419	-0.231	406536
Sherpa_Nepal	Bianbian_EN	Tibetan_Lhasa	-0.000216	0.000942	-0.229	256976
KhoMu	Tibetan_Shannan	Tibetan_Lhasa	-8.8e-05	0.000383	-0.229	403774
Tibetan_Shannan	Mongolia_EIA_6_Pazyryk	Tibetan_Lhasa	-0.00016	0.000709	-0.226	294801
Buryat_Bohansky	Tibetan_Shigatse	Tibetan_Lhasa	-9.4e-05	0.000417	-0.225	400336
Tibetan_Shigatse	Even	Tibetan_Lhasa	-8.8e-05	0.000393	-0.224	416988
Dao	Tibetan_Shigatse	Tibetan_Lhasa	-8.4e-05	0.000375	-0.223	402534
Tanshishan_LN	Nepal_Samdzong_1500BP	Tibetan_Lhasa	-0.00025	0.001144	-0.219	153209
Buryat_Zakamensky	Nepal_Mebrak_2125BP	Tibetan_Lhasa	-0.000193	0.000887	-0.218	271633
Cong	Nepal_Mebrak_2125BP	Tibetan_Lhasa	-0.000185	0.000852	-0.217	271497
Mongol_Sainnoyon	Tibetan_Shigatse	Tibetan_Lhasa	-7.7e-05	0.000368	-0.21	408253
Russia_UstIda_EBA	Nepal_Samdzong_1500BP	Tibetan_Lhasa	-0.000183	0.000885	-0.207	279944
Russian	Miaozigou_MN	Tibetan_Lhasa	-0.000243	0.00118	-0.206	121590
Ilocano	Tibetan_Shannan	Tibetan_Lhasa	-0.000114	0.000552	-0.206	390999
Htin_Mal	Tibetan_Shannan	Tibetan_Lhasa	-9e-05	0.000438	-0.205	393907
Cong	Tibetan_Shigatse	Tibetan_Lhasa	-7.6e-05	0.000376	-0.203	402787
Tibetan_Shigatse	Uzbek_Tashkent	Tibetan_Lhasa	-8.7e-05	0.000428	-0.203	424134
Tibetan_Shannan	Uyghur_HGDP	Tibetan_Lhasa	-7.5e-05	0.000378	-0.197	423167
Tibetan_Shigatse	Veps	Tibetan_Lhasa	-9.9e-05	0.000505	-0.197	424093
Kabardinian	Nepal_Mebrak_2125BP	Tibetan_Lhasa	-0.000211	0.00108	-0.195	289055
PhuLa	Nepal_Samdzong_1500BP	Tibetan_Lhasa	-0.000105	0.000539	-0.195	394524
Tibetan_Chamdo	Mongolia_EIA_2	Tibetan_Lhasa	-0.000145	0.000748	-0.194	297286
Yakut_HGDP	Nepal_Mebrak_2125BP	Tibetan_Lhasa	-0.000157	0.00081	-0.193	283524
Liangdao1_EN	Zhalainuoer_IA	Tibetan_Lhasa	-0.001164	0.006086	-0.191	9465
Tibetan_Shigatse	Mongolia_EBA_1_Ulgii	Tibetan_Lhasa	-9.5e-05	0.000503	-0.189	363766
Eskimo_ChaplinSireniki	Sherpa_Nepal	Tibetan_Lhasa	-0.000113	0.000609	-0.186	393819
PhuLa	Tibetan_Shannan	Tibetan_Lhasa	-7e-05	0.000376	-0.186	400381
Tibetan_Shannan	Chuvash	Tibetan_Lhasa	-8.4e-05	0.000454	-0.186	431505
Visayan	Nepal_Samdzong_1500BP	Tibetan_Lhasa	-0.000122	0.000668	-0.182	387204
Chukchi	Nepal_Samdzong_1500BP	Tibetan_Lhasa	-0.000116	0.00064	-0.182	403077
Tibetan_Shigatse	Mongolia_LBA_5_CenterWest	Tibetan_Lhasa	-0.000105	0.000579	-0.181	374615
Adygei	Tibetan_Shigatse	Tibetan_Lhasa	-8.6e-05	0.000484	-0.177	443067
Tibetan_Nagqu	Mongolia_EIA_6_Pazyryk	Tibetan_Lhasa	-0.000127	0.000732	-0.173	294042
Sherpa_Nepal	Xitoucun_LN	Tibetan_Lhasa	-0.000132	0.000774	-0.17	211715
Tibetan_Shigatse	Mongolia_MBA_1_Munkhkhairkhan	Tibetan_Lhasa	-9.3e-05	0.00055	-0.169	362385
Tibetan_Shannan	Wanggou_MN	Tibetan_Lhasa	-8.3e-05	0.000516	-0.161	323815
Kubachinian	Jinchankou_LN	Tibetan_Lhasa	-0.000205	0.001313	-0.156	292519
Japanese_Tokyo1K	Nepal_Mebrak_2125BP	Tibetan_Lhasa	-0.000108	0.000708	-0.152	284158
Buryat_Duldurginsky	Nepal_Samdzong_1500BP	Tibetan_Lhasa	-9.1e-05	0.000601	-0.152	390100
Tay	Tibetan_Shigatse	Tibetan_Lhasa	-5.6e-05	0.000372	-0.151	401343
Tibetan_Shigatse	Mongolia_EIA_1_SlabGrave	Tibetan_Lhasa	-5.4e-05	0.000363	-0.15	393839
DevilsCave_N	Nepal_Samdzong_1500BP	Tibetan_Lhasa	-0.000127	0.000856	-0.149	378794
Tibetan_Shigatse	Vietnam_Lahu	Tibetan_Lhasa	-5.4e-05	0.000375	-0.145	400086
Ami	Tibetan_Shigatse	Tibetan_Lhasa	-6e-05	0.000423	-0.141	400844
Ossetian	Tibetan_Chamdo	Tibetan_Lhasa	-6.7e-05	0.000479	-0.14	436711
Tibetan_Shannan	Karakalpak	Tibetan_Lhasa	-5e-05	0.000366	-0.138	434104
Tibetan_Shigatse	Lajia_LN	Tibetan_Lhasa	-6.5e-05	0.000474	-0.137	387819
Tibetan_Xunhua	Nepal_Chokhopani_2700BP	Tibetan_Lhasa	-0.000131	0.000962	-0.136	381293
Mongol_Uuld	Nepal_Mebrak_2125BP	Tibetan_Lhasa	-0.000106	0.000786	-0.135	279599
HaNhi	Tibetan_Shannan	Tibetan_Lhasa	-4.8e-05	0.000356	-0.135	400186
Tibetan_Shannan	Shor_Mountain	Tibetan_Lhasa	-5.9e-05	0.000434	-0.135	408218
Tibetan_Shannan	Tatar_Zabolotniye	Tibetan_Lhasa	-6e-05	0.000446	-0.135	408615
Mongol_Minorities	Tibetan_Shigatse	Tibetan_Lhasa	-4.8e-05	0.000354	-0.134	412244
Tibetan_Shigatse	Longtoushan_BA	Tibetan_Lhasa	-8.1e-05	0.000609	-0.133	220643
Tibetan_Shannan	Mongolia_EIA_3	Tibetan_Lhasa	-9.6e-05	0.000728	-0.132	276685
Jinchankou_LN	Mongolia_EIA_2	Tibetan_Lhasa	-0.000248	0.00189	-0.131	201756
Tibetan_Shigatse	Russia_Srubnaya	Tibetan_Lhasa	-6.9e-05	0.000525	-0.131	413470
Sherpa_Nepal	Suogang_LN	Tibetan_Lhasa	-0.000199	0.001546	-0.128	29326
Tibetan_Shannan	Pingliangtai_LN	Tibetan_Lhasa	-6.3e-05	0.000497	-0.126	392126
Han_Chongqing	Nepal_Mebrak_2125BP	Tibetan_Lhasa	-0.00012	0.001009	-0.119	260415
Shimao_LN	Nepal_Chokhopani_2700BP	Tibetan_Lhasa	-0.000156	0.001312	-0.119	366940
Tibetan_Shigatse	Evenk_Transbaikal	Tibetan_Lhasa	-4.9e-05	0.000415	-0.119	403282
Daur_HGDP	Nepal_Mebrak_2125BP	Tibetan_Lhasa	-9.9e-05	0.000846	-0.117	271971
Tibetan_Nagqu	Russia_Poltavka	Tibetan_Lhasa	-6.7e-05	0.000573	-0.117	399156
UstBelaya_EBA	Nepal_Mebrak_2125BP	Tibetan_Lhasa	-0.000144	0.001262	-0.114	253688
Japanese_Tokyo1K	Tibetan_Shigatse	Tibetan_Lhasa	-3.6e-05	0.00032	-0.113	416052
Tajik_Lowland	Tibetan_Chamdo	Tibetan_Lhasa	-5.1e-05	0.00045	-0.113	430245
Tibetan_Nagqu	Mongolia_LBA_1_MongunTaiga	Tibetan_Lhasa	-8.9e-05	0.000788	-0.112	186563
Tibetan_Chamdo	Tatar_Mishar	Tibetan_Lhasa	-4.9e-05	0.000461	-0.107	428258
Russia_Steppe_Maikop	Jinchankou_LN	Tibetan_Lhasa	-0.000155	0.001465	-0.106	251008
Lak	Miaozigou_MN	Tibetan_Lhasa	-0.000132	0.001284	-0.103	114493
Tibetan_Shannan	Kazakh_Aksay	Tibetan_Lhasa	-3.6e-05	0.00036	-0.101	412980
Tibetan_Shannan	Erdaojingzi_LN	Tibetan_Lhasa	-5.5e-05	0.000555	-0.1	333756
Khovsgol_LBA	Nepal_Mebrak_2125BP	Tibetan_Lhasa	-9e-05	0.000907	-0.099	263383
Buryat_Selenginsky	Nepal_Samdzong_1500BP	Tibetan_Lhasa	-6.2e-05	0.000626	-0.099	393898
Russia_Andronovo	Jinchankou_LN	Tibetan_Lhasa	-0.000143	0.001471	-0.097	275318
BoY	Tibetan_Shigatse	Tibetan_Lhasa	-3.8e-05	0.000428	-0.089	401681
Russia_Sarmatian	Jinchankou_LN	Tibetan_Lhasa	-0.000118	0.001407	-0.084	235223
Kabardinian	Tibetan_Chamdo	Tibetan_Lhasa	-4.1e-05	0.0005	-0.082	426615
Even	Nepal_Mebrak_2125BP	Tibetan_Lhasa	-6.9e-05	0.000856	-0.081	282548
Vietnamese	Nepal_Samdzong_1500BP	Tibetan_Lhasa	-4.4e-05	0.000544	-0.081	395008
Dong_Guizhou	Tibetan_Shigatse	Tibetan_Lhasa	-2.9e-05	0.000355	-0.081	405846
Yi_HGDP	Nepal_Mebrak_2125BP	Tibetan_Lhasa	-6.1e-05	0.000788	-0.078	269803
Tay	Nepal_Mebrak_2125BP	Tibetan_Lhasa	-6.6e-05	0.000845	-0.078	270474
Eskimo_Naukan	Nepal_Chokhopani_2700BP	Tibetan_Lhasa	-7.9e-05	0.001015	-0.078	389311
Nogai2	Nepal_Mebrak_2125BP	Tibetan_Lhasa	-6.4e-05	0.000841	-0.076	291206
Tibetan_Chamdo	Russia_Caucasus_EBA_Yamnaya	Tibetan_Lhasa	-4.7e-05	0.000612	-0.076	297406
Tibetan_Shigatse	Russia_UstIda_LN	Tibetan_Lhasa	-3.9e-05	0.000536	-0.073	360096
Tajik	Jinchankou_LN	Tibetan_Lhasa	-8.2e-05	0.001157	-0.071	299297
Tibetan_Shigatse	Wuzhuangguoliang	Tibetan_Lhasa	-5.3e-05	0.000766	-0.069	55923
Even	Nepal_Chokhopani_2700BP	Tibetan_Lhasa	-5.8e-05	0.000893	-0.065	409539
Lak	Tibetan_Shigatse	Tibetan_Lhasa	-3.3e-05	0.000521	-0.064	427046
Even	Nepal_Samdzong_1500BP	Tibetan_Lhasa	-3.8e-05	0.000596	-0.063	411958
Atayal	Tibetan_Shannan	Tibetan_Lhasa	-2.8e-05	0.000471	-0.06	397681
Tibetan_Chamdo	Russia_Bolshoy	Tibetan_Lhasa	-2.9e-05	0.000491	-0.059	367818
Erdaojingzi_LN	Nepal_Samdzong_1500BP	Tibetan_Lhasa	-5.2e-05	0.000882	-0.058	320443
Tibetan_Nagqu	Russia_North_Caucasus	Tibetan_Lhasa	-3.5e-05	0.000615	-0.057	316295
Qiang_Danba	Nepal_Mebrak_2125BP	Tibetan_Lhasa	-4.1e-05	0.000758	-0.054	268496
Aleut	Tibetan_Shigatse	Tibetan_Lhasa	-2.5e-05	0.000462	-0.054	418714
Tibetan_Chamdo	Russia_Andronovo	Tibetan_Lhasa	-3e-05	0.000562	-0.053	404225
Sherpa_Nepal	Mongolia_LBA_1_MongunTaiga	Tibetan_Lhasa	-4.9e-05	0.000959	-0.052	182550
Russian_Pinezhsky	Miaozigou_MN	Tibetan_Lhasa	-6.5e-05	0.001279	-0.051	111093
Mongolia_EIA_8	Nepal_Chokhopani_2700BP	Tibetan_Lhasa	-7.4e-05	0.001691	-0.044	277055
Tibetan_Chamdo	Russia_MLBA_Krasnoyarsk	Tibetan_Lhasa	-2.2e-05	0.000505	-0.044	407718
Tajik_Mountain	Tibetan_Chamdo	Tibetan_Lhasa	-2e-05	0.000447	-0.044	430053
Dong_Hunan	Tibetan_Shannan	Tibetan_Lhasa	-1.5e-05	0.00038	-0.039	398651
Tibetan_Shigatse	Yumin_EN	Tibetan_Lhasa	-2.5e-05	0.000697	-0.035	321588
Xibo_HGDP	Nepal_Mebrak_2125BP	Tibetan_Lhasa	-2.9e-05	0.000846	-0.034	269352
Aleut	Tibetan_Shannan	Tibetan_Lhasa	-1.6e-05	0.000465	-0.033	417811
Tibetan_Shannan	Longtoushan_BA	Tibetan_Lhasa	-1.9e-05	0.0006	-0.032	219865
Russia_North_Caucasus	Nepal_Chokhopani_2700BP	Tibetan_Lhasa	-4.7e-05	0.001447	-0.032	304553
Cambodian	Nepal_Mebrak_2125BP	Tibetan_Lhasa	-2.7e-05	0.000894	-0.03	274852
Tibetan_Shigatse	Russia_Late_Sarmatian	Tibetan_Lhasa	-1.5e-05	0.000548	-0.028	385617
Qiang_Danba	Russia_Poltavka	Tibetan_Lhasa	-1.5e-05	0.000574	-0.026	400703
Tu_HGDP	Tibetan_Shannan	Tibetan_Lhasa	-9e-06	0.000362	-0.026	405247
Kalmyk	Nepal_Samdzong_1500BP	Tibetan_Lhasa	-1.3e-05	0.000535	-0.024	409515
Mang	Nepal_Samdzong_1500BP	Tibetan_Lhasa	-1.4e-05	0.000595	-0.023	390839
Tlingit	Tibetan_Shigatse	Tibetan_Lhasa	-9e-06	0.0005	-0.017	409668
Russian_Leshukonsky	Tibetan_Chamdo	Tibetan_Lhasa	-7e-06	0.000498	-0.015	417408
She_HGDP	Nepal_Samdzong_1500BP	Tibetan_Lhasa	-8e-06	0.000566	-0.014	393120
Yumin_EN	Nepal_Samdzong_1500BP	Tibetan_Lhasa	-1.4e-05	0.001121	-0.013	307414
Abazin	Tibetan_Shigatse	Tibetan_Lhasa	-5e-06	0.000495	-0.011	425462
Tibetan_Shannan	Bashkir_central	Tibetan_Lhasa	-4e-06	0.000429	-0.01	434018
Han_Chongqing	Nepal_Chokhopani_2700BP	Tibetan_Lhasa	-7e-06	0.001043	-0.007	377404
Tibetan_Shigatse	Russia_Poltavka	Tibetan_Lhasa	-3e-06	0.000549	-0.006	401064
Visayan	Tibetan_Shannan	Tibetan_Lhasa	-2e-06	0.00045	-0.004	396707
Mongolia_BA_2	Nepal_Chokhopani_2700BP	Tibetan_Lhasa	-5e-06	0.001857	-0.003	193400
Mongol_Uuld	Tibetan_Shigatse	Tibetan_Lhasa	-1e-06	0.000359	-0.002	412821
Tibetan_Shigatse	Mongolia_N_North	Tibetan_Lhasa	-1e-06	0.000449	-0.001	380782

## Sheet: Table S7
Table S7. Admxiture-f3-statistics of the form f3(Source population1, Source population2; Nagqu Tibetan) showed the admixture signals for high-altitude adaptive Nagqu Tibetan
Source1	Source2	Target	f_3	std.err	Z	SNPs
Qiang_Danba	Tibetan_Shannan	Tibetan_Nagqu	-0.002375	0.000376	-6.314	397885
Tibetan_Lhasa	Tibetan_Yajiang	Tibetan_Nagqu	-0.002092	0.000363	-5.761	399663
Qiang_Danba	Tibetan_Lhasa	Tibetan_Nagqu	-0.001956	0.000353	-5.543	397908
Tibetan_Shigatse	Tibetan_Yajiang	Tibetan_Nagqu	-0.001888	0.00036	-5.247	400760
Qiang_Danba	Tibetan_Shigatse	Tibetan_Nagqu	-0.00182	0.000362	-5.032	398998
Qiang_Daofu	Tibetan_Lhasa	Tibetan_Nagqu	-0.001715	0.000345	-4.971	399975
Tibetan_Shannan	Tibetan_Yajiang	Tibetan_Nagqu	-0.001834	0.000383	-4.783	399513
Han_Shandong	Tibetan_Shannan	Tibetan_Nagqu	-0.001745	0.000372	-4.689	399628
Tibetan_Chamdo	Russia_Steppe_Maikop	Tibetan_Nagqu	-0.002724	0.000581	-4.686	364697
Tibetan_Shannan	Yi_HGDP	Tibetan_Nagqu	-0.001684	0.00036	-4.676	399129
Tibetan_Lhasa	Tibetan_Xinlong	Tibetan_Nagqu	-0.001632	0.000358	-4.564	400737
Qiang_Daofu	Tibetan_Shannan	Tibetan_Nagqu	-0.001611	0.00036	-4.477	399782
Tibetan_Shannan	Tibetan_Xinlong	Tibetan_Nagqu	-0.001598	0.000361	-4.428	400874
Buryat_Selenginsky	Tibetan_Shigatse	Tibetan_Nagqu	-0.001778	0.000406	-4.382	402329
Qiang_Danba	Sherpa_Nepal	Tibetan_Nagqu	-0.001947	0.000445	-4.38	392095
Tibetan_Shannan	Mongolia_EIA_1_SlabGrave	Tibetan_Nagqu	-0.001846	0.000429	-4.307	391589
Tibetan_Chamdo	Uyghur_HGDP	Tibetan_Nagqu	-0.001623	0.000377	-4.306	423660
Tibetan_Shigatse	Yi_HGDP	Tibetan_Nagqu	-0.00154	0.000358	-4.303	400565
Qiang_Danba	Nepal_Samdzong_1500BP	Tibetan_Nagqu	-0.002192	0.000509	-4.303	390433
Tibetan_Shigatse	Nanai	Tibetan_Nagqu	-0.001655	0.000386	-4.291	399681
Tibetan_Chamdo	Tibetan_Shigatse	Tibetan_Nagqu	-0.001488	0.000349	-4.268	400164
Buryat_Selenginsky	Tibetan_Lhasa	Tibetan_Nagqu	-0.001724	0.000412	-4.181	401012
Tibetan_Chamdo	Uzbek_Khorezm	Tibetan_Nagqu	-0.001779	0.000429	-4.146	416975
Tibetan_Lhasa	Yi_HGDP	Tibetan_Nagqu	-0.001497	0.000365	-4.101	399200
Tibetan_Chamdo	Bashkir_south	Tibetan_Nagqu	-0.001646	0.000402	-4.091	435227
Tibetan_Chamdo	Udmurt	Tibetan_Nagqu	-0.001881	0.000469	-4.013	423583
Adygei	Tibetan_Chamdo	Tibetan_Nagqu	-0.001913	0.000477	-4.013	443150
Tibetan_Chamdo	Mongolia_EBA_2_Chemurchek	Tibetan_Nagqu	-0.002425	0.00061	-3.977	339293
HaNhi	Tibetan_Lhasa	Tibetan_Nagqu	-0.001521	0.000384	-3.958	399336
Tibetan_Chamdo	Tibetan_Shannan	Tibetan_Nagqu	-0.001381	0.00035	-3.951	399215
Tibetan_Chamdo	Russia_Bolshoy	Tibetan_Nagqu	-0.001947	0.000495	-3.932	366646
Han_SichuanHO	Tibetan_Shannan	Tibetan_Nagqu	-0.001558	0.000397	-3.929	397419
Buryat_Selenginsky	Tibetan_Shannan	Tibetan_Nagqu	-0.001764	0.000449	-3.927	401105
Tajik_Lowland	Tibetan_Chamdo	Tibetan_Nagqu	-0.001825	0.000469	-3.89	429761
Tibetan_Shigatse	Tibetan_Xinlong	Tibetan_Nagqu	-0.001358	0.00035	-3.885	402015
Tibetan_Shannan	Mongolia_N_North	Tibetan_Nagqu	-0.001945	0.000501	-3.88	378121
Tibetan_Yajiang	Nepal_Samdzong_1500BP	Tibetan_Nagqu	-0.002053	0.00053	-3.876	391992
Yugur_Sunan	Tibetan_Lhasa	Tibetan_Nagqu	-0.001331	0.000345	-3.86	410518
Han_Guangdong	Tibetan_Lhasa	Tibetan_Nagqu	-0.001548	0.000401	-3.858	398300
Han_Shandong	Tibetan_Shigatse	Tibetan_Nagqu	-0.001375	0.000357	-3.846	400717
Qiang_Daofu	Tibetan_Shigatse	Tibetan_Nagqu	-0.001327	0.000345	-3.843	401040
Tibetan_Shannan	Evenk_FarEast	Tibetan_Nagqu	-0.002044	0.000535	-3.821	389493
Tibetan_Chamdo	Russia_Srubnaya_Alakul	Tibetan_Nagqu	-0.002032	0.000532	-3.817	416544
Tibetan_Chamdo	Bashkir_north	Tibetan_Nagqu	-0.001639	0.000434	-3.777	436170
Tibetan_Chamdo	Bashkir_central	Tibetan_Nagqu	-0.001608	0.000426	-3.775	434441
Tibetan_Shigatse	Evenk_FarEast	Tibetan_Nagqu	-0.001939	0.000516	-3.755	391230
Tajik	Tibetan_Chamdo	Tibetan_Nagqu	-0.001796	0.000481	-3.733	426317
Tibetan_Shannan	Mongolia_Chalcolithic_2_Afanasievo	Tibetan_Nagqu	-0.002737	0.000734	-3.727	280243
Tibetan_Lhasa	Mongolia_EIA_1_SlabGrave	Tibetan_Nagqu	-0.001497	0.000402	-3.722	391674
Han_Beijing1K	Tibetan_Shannan	Tibetan_Nagqu	-0.001278	0.000344	-3.715	418258
Circassian	Tibetan_Chamdo	Tibetan_Nagqu	-0.001853	0.0005	-3.705	427604
Tibetan_Chamdo	Mongolia_LBA_5_CenterWest	Tibetan_Nagqu	-0.002097	0.000566	-3.703	374689
Tagalog	Tibetan_Lhasa	Tibetan_Nagqu	-0.001572	0.000425	-3.702	398069
Tibetan_Chamdo	Chuvash	Tibetan_Nagqu	-0.00164	0.000444	-3.694	432089
Tibetan_Chamdo	Shor_Mountain	Tibetan_Nagqu	-0.001575	0.000427	-3.69	408749
Han_Zhejiang	Tibetan_Lhasa	Tibetan_Nagqu	-0.001499	0.000407	-3.682	394456
Japanese_Tokyo1K	Tibetan_Shannan	Tibetan_Nagqu	-0.0013	0.000353	-3.681	415190
Han_Shandong	Tibetan_Lhasa	Tibetan_Nagqu	-0.001333	0.000362	-3.681	399612
Tibetan_Lhasa	Mongolia_LBA_4_CenterWest	Tibetan_Nagqu	-0.001529	0.000416	-3.677	394649
Tibetan_Chamdo	Russia_EBA_Yamnaya_Kalmykia	Tibetan_Nagqu	-0.00221	0.000602	-3.672	389169
Qiang_Danba	Russia_EBA_Yamnaya_Kalmykia	Tibetan_Nagqu	-0.00236	0.000644	-3.662	386794
Kabardinian	Tibetan_Chamdo	Tibetan_Nagqu	-0.001797	0.000493	-3.648	426011
Mulam_Luocheng	Tibetan_Shannan	Tibetan_Nagqu	-0.001408	0.000388	-3.627	406145
Russian_HGDP	Tibetan_Chamdo	Tibetan_Nagqu	-0.001751	0.000484	-3.621	438536
Tibetan_Chamdo	XiongNu_WE	Tibetan_Nagqu	-0.002176	0.000601	-3.62	360557
Tibetan_Chamdo	Mordovian	Tibetan_Nagqu	-0.001718	0.000476	-3.605	443179
Naxi_HGDP	Tibetan_Shannan	Tibetan_Nagqu	-0.001398	0.000389	-3.596	398479
Tibetan_Chamdo	Veps	Tibetan_Nagqu	-0.001786	0.000497	-3.593	424421
Tibetan_Lhasa	Lajia_LN	Tibetan_Nagqu	-0.001751	0.000488	-3.59	385111
Tibetan_Lhasa	Kyrgyz_Urumqi	Tibetan_Nagqu	-0.001319	0.000368	-3.588	423300
Tibetan_Chamdo	Russia_Afanasievo	Tibetan_Nagqu	-0.00184	0.000516	-3.567	424995
Mulam_Luocheng	Tibetan_Lhasa	Tibetan_Nagqu	-0.001356	0.00038	-3.565	405930
Qiang_Danba	Russia_Steppe_Maikop	Tibetan_Nagqu	-0.002193	0.000615	-3.563	362518
Han_SouthChina1K	Tibetan_Shannan	Tibetan_Nagqu	-0.00125	0.000351	-3.559	415973
HaNhi	Tibetan_Shigatse	Tibetan_Nagqu	-0.001319	0.000373	-3.538	400500
Tibetan_Shigatse	Mongolia_EIA_1_SlabGrave	Tibetan_Nagqu	-0.001434	0.000406	-3.531	392849
Tibetan_Shannan	Mongolia_LBA_4_CenterWest	Tibetan_Nagqu	-0.001529	0.000433	-3.527	394578
Kubachinian	Tibetan_Chamdo	Tibetan_Nagqu	-0.001894	0.000538	-3.52	419568
Tibetan_Chamdo	Russia_Karasuk	Tibetan_Nagqu	-0.001727	0.000492	-3.512	410093
Tibetan_Chamdo	Russia_MLBA_Sintashta	Tibetan_Nagqu	-0.001785	0.000508	-3.511	423612
Russian_Leshukonsky	Tibetan_Chamdo	Tibetan_Nagqu	-0.00183	0.000523	-3.5	416644
Han_Shanxi	Tibetan_Shannan	Tibetan_Nagqu	-0.001386	0.000396	-3.497	398585
Tibetan_Shigatse	Hezhen_HGDP	Tibetan_Nagqu	-0.001322	0.000379	-3.482	400890
Gelao_Longlin	Tibetan_Lhasa	Tibetan_Nagqu	-0.001386	0.000398	-3.481	400758
Tibetan_Chamdo	Tatar_Mishar	Tibetan_Nagqu	-0.001617	0.000465	-3.48	427831
Tibetan_Lhasa	Tuvinian	Tibetan_Nagqu	-0.001244	0.000358	-3.478	421343
Ukrainian	Tibetan_Chamdo	Tibetan_Nagqu	-0.001741	0.0005	-3.478	441370
Tibetan_Chamdo	Russia_Alan	Tibetan_Nagqu	-0.001971	0.000567	-3.477	401891
Tlingit	Tibetan_Chamdo	Tibetan_Nagqu	-0.00163	0.000469	-3.476	409687
She_HGDP	Tibetan_Lhasa	Tibetan_Nagqu	-0.001335	0.000385	-3.468	398999
Tibetan_Chamdo	Mongolia_MBA_2_Munkhkhairkhan	Tibetan_Nagqu	-0.00241	0.000696	-3.461	306208
Tibetan_Chamdo	Russia_Late_Sarmatian	Tibetan_Nagqu	-0.001939	0.000561	-3.459	385759
Kurd	Tibetan_Chamdo	Tibetan_Nagqu	-0.001755	0.000508	-3.454	426507
Tibetan_Chamdo	Mansi	Tibetan_Nagqu	-0.001513	0.00044	-3.439	416511
Tibetan_Shannan	Oroqen_HGDP	Tibetan_Nagqu	-0.001359	0.000395	-3.437	401475
Tagalog	Tibetan_Chamdo	Tibetan_Nagqu	-0.001398	0.000407	-3.432	399637
Qiang_Daofu	Sherpa_Nepal	Tibetan_Nagqu	-0.001411	0.000412	-3.428	394925
Tibetan_Shigatse	TibetanHO_Yunnan	Tibetan_Nagqu	-0.001528	0.000446	-3.428	393117
Tibetan_Gangcha	Tibetan_Lhasa	Tibetan_Nagqu	-0.001046	0.000305	-3.425	411508
Mongol_Uuld	Tibetan_Lhasa	Tibetan_Nagqu	-0.00122	0.000357	-3.412	411466
Tibetan_Shigatse	Lajia_LN	Tibetan_Nagqu	-0.001727	0.000506	-3.412	386734
Tibetan_Chamdo	Russia_Srubnaya	Tibetan_Nagqu	-0.001778	0.000526	-3.383	413696
Tibetan_Chamdo	Tatar_Siberian	Tibetan_Nagqu	-0.001296	0.000384	-3.373	431614
Naxi_HGDP	Tibetan_Shigatse	Tibetan_Nagqu	-0.001228	0.000364	-3.37	399629
Han_Jiangsu	Tibetan_Shannan	Tibetan_Nagqu	-0.001372	0.000407	-3.369	396684
Han_Shanxi	Tibetan_Lhasa	Tibetan_Nagqu	-0.001307	0.000388	-3.366	398617
Tibetan_Shannan	Mongolia_EBA_1_Ulgii	Tibetan_Nagqu	-0.001707	0.000509	-3.356	361118
Qiang_Daofu	Nepal_Samdzong_1500BP	Tibetan_Nagqu	-0.001605	0.000478	-3.355	393675
Tibetan_Chamdo	Russia_North_Caucasus	Tibetan_Nagqu	-0.00189	0.000564	-3.351	318172
Tibetan_Shannan	Hezhen_HGDP	Tibetan_Nagqu	-0.001341	0.0004	-3.349	399434
Tibetan_Chamdo	Russia_BA_Okunevo	Tibetan_Nagqu	-0.001591	0.000476	-3.346	411024
Han_SouthChina1K	Tibetan_Lhasa	Tibetan_Nagqu	-0.001133	0.000339	-3.338	415934
Tibetan_Lhasa	Nanai	Tibetan_Nagqu	-0.001307	0.000392	-3.332	398545
Russian	Tibetan_Chamdo	Tibetan_Nagqu	-0.001641	0.000493	-3.331	449300
Newar_Nepal	Tibetan_Chamdo	Tibetan_Nagqu	-0.001296	0.000389	-3.328	412640
Abkhasian	Tibetan_Chamdo	Tibetan_Nagqu	-0.001693	0.000509	-3.325	430072
Tibetan_Lhasa	Yukagir	Tibetan_Nagqu	-0.001285	0.000387	-3.315	420377
Muong	Tibetan_Shannan	Tibetan_Nagqu	-0.001376	0.000416	-3.309	402392
Tibetan_Shannan	Xibo_HGDP	Tibetan_Nagqu	-0.001356	0.000411	-3.3	399658
Han_SichuanHO	Tibetan_Lhasa	Tibetan_Nagqu	-0.001276	0.000387	-3.299	397392
Buryat_Selenginsky	Tibetan_Chamdo	Tibetan_Nagqu	-0.001323	0.000401	-3.297	402678
Tibetan_Chamdo	Uzbek_Tashkent	Tibetan_Nagqu	-0.001362	0.000413	-3.297	424012
Muong	Tibetan_Shigatse	Tibetan_Nagqu	-0.001268	0.000386	-3.288	403308
Tibetan_Lhasa	TibetanHO_Yunnan	Tibetan_Nagqu	-0.001434	0.000436	-3.288	391770
Japanese_HGDP	Tibetan_Lhasa	Tibetan_Nagqu	-0.001183	0.00036	-3.287	409310
Tibetan_Chamdo	Tibetan_Lhasa	Tibetan_Nagqu	-0.00109	0.000332	-3.281	399239
Kinh_HoChiMinh1K	Tibetan_Shannan	Tibetan_Nagqu	-0.001188	0.000365	-3.257	422335
Yugur_Sunan	Tibetan_Shannan	Tibetan_Nagqu	-0.001186	0.000364	-3.256	410597
Tibetan_Chamdo	Karelian	Tibetan_Nagqu	-0.001596	0.000491	-3.253	432058
Tamang_Nepal	Tibetan_Chamdo	Tibetan_Nagqu	-0.001145	0.000353	-3.242	404440
Tibetan_Chamdo	Karakalpak	Tibetan_Nagqu	-0.001194	0.000368	-3.241	434357
Tibetan_Chamdo	Russia_EBA_Yamnaya_Samara	Tibetan_Nagqu	-0.001786	0.000553	-3.231	403416
Tibetan_Lhasa	Zhalainuoer_IA	Tibetan_Nagqu	-0.004532	0.001404	-3.228	21377
PaThen	Tibetan_Shannan	Tibetan_Nagqu	-0.001419	0.00044	-3.226	396890
Tibetan_Chamdo	Tatar_Kazan	Tibetan_Nagqu	-0.001463	0.000454	-3.224	430871
Tibetan_Shannan	Lajia_LN	Tibetan_Nagqu	-0.001658	0.000515	-3.218	384991
Tibetan_Chamdo	Mongolia_EIA_4_Sagly	Tibetan_Nagqu	-0.001404	0.000437	-3.212	410947
Tibetan_Chamdo	Tubalar	Tibetan_Nagqu	-0.001219	0.00038	-3.209	428043
Tibetan_Lhasa	Mongolia_N_East	Tibetan_Nagqu	-0.001788	0.000557	-3.209	348044
Tibetan_Shigatse	Xibo_HGDP	Tibetan_Nagqu	-0.001213	0.000379	-3.2	400729
Mogolian_HGDP	Tibetan_Lhasa	Tibetan_Nagqu	-0.001311	0.00041	-3.196	398986
Tibetan_Shigatse	Mongolia_BA_2	Tibetan_Nagqu	-0.002514	0.000787	-3.193	204619
Sherpa_Nepal	Tibetan_Chamdo	Tibetan_Nagqu	-0.00129	0.000405	-3.183	394553
Tibetan_Chamdo	Russia_IA	Tibetan_Nagqu	-0.001458	0.00046	-3.171	399878
Ossetian	Tibetan_Chamdo	Tibetan_Nagqu	-0.00153	0.000483	-3.167	436128
Tibetan_Lhasa	Pingliangtai_LN	Tibetan_Nagqu	-0.001604	0.000507	-3.167	390752
Tibetan_Lhasa	Evenk_FarEast	Tibetan_Nagqu	-0.001754	0.000556	-3.154	389372
Japanese_Tokyo1K	Tibetan_Lhasa	Tibetan_Nagqu	-0.001071	0.00034	-3.145	415114
Dong_Guizhou	Tibetan_Lhasa	Tibetan_Nagqu	-0.00119	0.000379	-3.138	404397
Lahu_HGDP	Tibetan_Lhasa	Tibetan_Nagqu	-0.00131	0.000418	-3.133	398258
Tibetan_Lhasa	Mongolia_N_North	Tibetan_Nagqu	-0.001499	0.000478	-3.133	378218
Han_Beijing1K	Tibetan_Lhasa	Tibetan_Nagqu	-0.001032	0.00033	-3.124	418135
Qiang_Danba	Russia_MLBA_Sintashta	Tibetan_Nagqu	-0.001724	0.000553	-3.119	422724
Yugur_Sunan	Tibetan_Shigatse	Tibetan_Nagqu	-0.001029	0.00033	-3.117	411138
Tibetan_Lhasa	Hezhen_HGDP	Tibetan_Nagqu	-0.001222	0.000392	-3.116	399622
Qiang_Danba	Russia_Poltavka	Tibetan_Nagqu	-0.001886	0.000605	-3.116	399449
Tibetan_Lhasa	Tibetan_Xunhua	Tibetan_Nagqu	-0.001436	0.000463	-3.105	395253
Tibetan_Shigatse	Ulchi	Tibetan_Nagqu	-0.001114	0.00036	-3.098	409870
Tibetan_Lhasa	Wanggou_MN	Tibetan_Nagqu	-0.001641	0.00053	-3.098	322789
Tibetan_Chamdo	Shirenzigou_IA	Tibetan_Nagqu	-0.001744	0.000563	-3.098	281519
Qiang_Danba	Russia_Alan	Tibetan_Nagqu	-0.001908	0.000617	-3.094	399546
Tibetan_Shannan	Wadian_LN	Tibetan_Nagqu	-0.001765	0.000572	-3.085	387261
Tibetan_Lhasa	Mongolia_Chalcolithic_2_Afanasievo	Tibetan_Nagqu	-0.002329	0.000756	-3.082	280436
Kinh_HoChiMinh1K	Tibetan_Lhasa	Tibetan_Nagqu	-0.001063	0.000345	-3.079	422146
Korean	Tibetan_Shigatse	Tibetan_Nagqu	-0.001161	0.000378	-3.07	396844
Tibetan_Lhasa	Ulchi	Tibetan_Nagqu	-0.001137	0.000371	-3.067	409005
Buryat_Aginsky	Tibetan_Lhasa	Tibetan_Nagqu	-0.001135	0.000371	-3.056	411786
Mogolian_HGDP	Tibetan_Shannan	Tibetan_Nagqu	-0.001256	0.000411	-3.055	399031
Russian_Pinezhsky	Tibetan_Chamdo	Tibetan_Nagqu	-0.00156	0.000511	-3.055	417963
Qiang_Danba	Russia_Andronovo	Tibetan_Nagqu	-0.001881	0.000616	-3.053	400808
Tibetan_Shannan	Tujia_HGDP	Tibetan_Nagqu	-0.001203	0.000395	-3.047	400223
Tibetan_Shannan	TibetanHO_Yunnan	Tibetan_Nagqu	-0.001465	0.000481	-3.047	391451
Muong	Tibetan_Chamdo	Tibetan_Nagqu	-0.0011	0.000362	-3.039	403073
Sila	Tibetan_Shannan	Tibetan_Nagqu	-0.001337	0.00044	-3.038	396228
Mongol_Uuld	Tibetan_Shigatse	Tibetan_Nagqu	-0.001114	0.000367	-3.036	412210
Tibetan_Shannan	Nganasan	Tibetan_Nagqu	-0.001378	0.000454	-3.035	409548
Tibetan_Lhasa	Oroqen_HGDP	Tibetan_Nagqu	-0.001148	0.000379	-3.033	401565
Tibetan_Shannan	Russia_UstIda_LN	Tibetan_Nagqu	-0.001831	0.000604	-3.031	357538
Sherpa_Nepal	TibetanHO_Yunnan	Tibetan_Nagqu	-0.001802	0.000595	-3.03	383230
Hmong	Tibetan_Lhasa	Tibetan_Nagqu	-0.001215	0.000402	-3.024	402607
Japanese_Tokyo1K	Tibetan_Shigatse	Tibetan_Nagqu	-0.000987	0.000327	-3.022	415735
PhuLa	Tibetan_Lhasa	Tibetan_Nagqu	-0.001124	0.000374	-3.008	399556
Ingushian	Tibetan_Chamdo	Tibetan_Nagqu	-0.001527	0.000508	-3.007	429000
Lak	Tibetan_Chamdo	Tibetan_Nagqu	-0.001538	0.000512	-3.007	427483
Kabardinian	Qiang_Danba	Tibetan_Nagqu	-0.001645	0.000547	-3.007	425435
Tibetan_Chamdo	Kyrgyz_Urumqi	Tibetan_Nagqu	-0.001096	0.000365	-3.006	423958
Tibetan_Lhasa	Yakut_HGDP	Tibetan_Nagqu	-0.001138	0.000379	-3.001	415797
Tajik_Mountain	Tibetan_Chamdo	Tibetan_Nagqu	-0.001407	0.000469	-3	429613
Dong_Guizhou	Tibetan_Shigatse	Tibetan_Nagqu	-0.001098	0.000366	-2.998	405510
Kubachinian	Qiang_Danba	Tibetan_Nagqu	-0.001697	0.000566	-2.998	418572
Tibetan_Chamdo	Russia_MLBA_Krasnoyarsk	Tibetan_Nagqu	-0.001523	0.00051	-2.987	406856
Dong_Guizhou	Tibetan_Chamdo	Tibetan_Nagqu	-0.001028	0.000344	-2.985	404992
Adygei	Qiang_Danba	Tibetan_Nagqu	-0.001563	0.000524	-2.984	443390
Dong_Guizhou	Tibetan_Shannan	Tibetan_Nagqu	-0.001166	0.000391	-2.982	404487
CoLao	Tibetan_Lhasa	Tibetan_Nagqu	-0.001243	0.000418	-2.977	396837
Abazin	Tibetan_Chamdo	Tibetan_Nagqu	-0.001427	0.000479	-2.976	425743
Tibetan_Lhasa	Russia_Shamanka_Eneolithic	Tibetan_Nagqu	-0.001284	0.000432	-2.975	398890
Tibetan_Chamdo	Nogai	Tibetan_Nagqu	-0.001298	0.000437	-2.97	427749
Han_SouthChina1K	Tibetan_Shigatse	Tibetan_Nagqu	-0.000962	0.000324	-2.967	416408
Tibetan_Chamdo	Yukagir	Tibetan_Nagqu	-0.00106	0.000358	-2.959	420932
Qiang_Danba	Russia_Afanasievo	Tibetan_Nagqu	-0.001628	0.000551	-2.954	424170
Korean	Tibetan_Lhasa	Tibetan_Nagqu	-0.001192	0.000403	-2.953	395595
Tibetan_Chamdo	Kumyk	Tibetan_Nagqu	-0.001484	0.000503	-2.952	428526
Han_Shanxi	Tibetan_Shigatse	Tibetan_Nagqu	-0.001115	0.000378	-2.949	399834
Tibetan_Lhasa	Negidal	Tibetan_Nagqu	-0.001367	0.000464	-2.948	390941
Tibetan_Shigatse	Tujia_HGDP	Tibetan_Nagqu	-0.001071	0.000364	-2.946	401370
Gelao_Longlin	Tibetan_Shannan	Tibetan_Nagqu	-0.001211	0.000411	-2.945	400759
Japanese_HGDP	Tibetan_Shannan	Tibetan_Nagqu	-0.001086	0.000369	-2.943	409329
Nivkh	Tibetan_Shigatse	Tibetan_Nagqu	-0.001275	0.000433	-2.942	398306
Tibetan_Shigatse	Dacaozi_IA	Tibetan_Nagqu	-0.00149	0.000508	-2.935	378576
Han_Guangdong	Tibetan_Shannan	Tibetan_Nagqu	-0.001228	0.000419	-2.934	398332
Tibetan_Shigatse	Mongolia_LBA_4_CenterWest	Tibetan_Nagqu	-0.001137	0.000388	-2.93	395824
Eskimo_ChaplinSireniki	Tibetan_Shannan	Tibetan_Nagqu	-0.001435	0.000491	-2.925	398943
Tibetan_Shigatse	Mongolia_N_North	Tibetan_Nagqu	-0.001418	0.000486	-2.921	379830
Tibetan_Lhasa	Mongolia_LBA_2_Ulaanzukh	Tibetan_Nagqu	-0.001476	0.000506	-2.914	348224
Tibetan_Shannan	Tanshishan_LN	Tibetan_Nagqu	-0.001986	0.000682	-2.913	158708
Tibetan_Chamdo	Russia_EarlySarmatian_SouthernUrals	Tibetan_Nagqu	-0.00166	0.00057	-2.912	306018
HaNhi	Tibetan_Shannan	Tibetan_Nagqu	-0.001163	0.0004	-2.911	399346
Buryat_Ehirit	Tibetan_Chamdo	Tibetan_Nagqu	-0.001085	0.000373	-2.908	404437
Tibetan_Chamdo	Russia_Tagar	Tibetan_Nagqu	-0.001447	0.000499	-2.902	405210
Daur_HGDP	Tibetan_Shannan	Tibetan_Nagqu	-0.001194	0.000411	-2.901	402459
Tu_HGDP	Tibetan_Lhasa	Tibetan_Nagqu	-0.001013	0.00035	-2.89	404586
Buryat_Ehirit	Tibetan_Lhasa	Tibetan_Nagqu	-0.001197	0.000414	-2.89	402991
Tibetan_Lhasa	Dolgan	Tibetan_Nagqu	-0.001308	0.000452	-2.89	399836
Tibetan_Chamdo	Russia_Sintashta_MLBA	Tibetan_Nagqu	-0.00183	0.000633	-2.89	360884
Daur_HGDP	Tibetan_Lhasa	Tibetan_Nagqu	-0.001129	0.000391	-2.888	402512
Tibetan_Shannan	Tuvinian	Tibetan_Nagqu	-0.001109	0.000384	-2.886	421029
Japanese_HGDP	Tibetan_Shigatse	Tibetan_Nagqu	-0.000986	0.000342	-2.884	410087
Tibetan_Lhasa	Khovsgol_LBA	Tibetan_Nagqu	-0.001167	0.000405	-2.878	392227
Tibetan_Shannan	Nanai	Tibetan_Nagqu	-0.001157	0.000404	-2.863	398619
Tibetan_Chamdo	Evenk_FarEast	Tibetan_Nagqu	-0.001382	0.000483	-2.862	391955
Tajik	Qiang_Danba	Tibetan_Nagqu	-0.001504	0.000526	-2.86	425809
Lak	Qiang_Danba	Tibetan_Nagqu	-0.001565	0.000549	-2.851	426854
Qiang_Danba	Russia_EBA_Yamnaya_Samara	Tibetan_Nagqu	-0.001689	0.000593	-2.851	401625
Nivkh	Tibetan_Lhasa	Tibetan_Nagqu	-0.001251	0.00044	-2.84	396906
Kinh_HGDP	Tibetan_Lhasa	Tibetan_Nagqu	-0.001108	0.000391	-2.837	401489
Tibetan_Chamdo	Tuvinian	Tibetan_Nagqu	-0.000946	0.000334	-2.828	421606
Kinh_Vietnam	Tibetan_Shannan	Tibetan_Nagqu	-0.001137	0.000403	-2.826	402891
Kalmyk	Tibetan_Lhasa	Tibetan_Nagqu	-0.00104	0.000368	-2.824	413121
Naxi_HGDP	Tibetan_Lhasa	Tibetan_Nagqu	-0.001038	0.000368	-2.823	398262
Eskimo_ChaplinSireniki	Sherpa_Nepal	Tibetan_Nagqu	-0.001637	0.000581	-2.819	392255
Qiang_Danba	Russia_Sintashta_MLBA	Tibetan_Nagqu	-0.00184	0.000654	-2.814	358529
Buryat_Ehirit	Tibetan_Shannan	Tibetan_Nagqu	-0.001194	0.000426	-2.803	402791
Tibetan_Shannan	Jiaozuoniecun_LBIA	Tibetan_Nagqu	-0.001685	0.000601	-2.802	358458
Han_Jiangsu	Tibetan_Lhasa	Tibetan_Nagqu	-0.001098	0.000393	-2.794	396368
Zhuang_Guangxi	Tibetan_Lhasa	Tibetan_Nagqu	-0.00106	0.00038	-2.787	407484
Tibetan_Chamdo	Mongolia_LBA_3_MongunTaiga	Tibetan_Nagqu	-0.001475	0.000529	-2.787	366072
Tibetan_Shannan	Mongolia_LBA_2_Ulaanzukh	Tibetan_Nagqu	-0.00145	0.00052	-2.786	348181
Tibetan_Chamdo	Russia_Poltavka	Tibetan_Nagqu	-0.001568	0.000563	-2.784	401354
Tibetan_Shannan	Tibetan_Xunhua	Tibetan_Nagqu	-0.001325	0.000477	-2.778	395044
Qiang_Danba	Russia_MLBA_Krasnoyarsk	Tibetan_Nagqu	-0.00145	0.000522	-2.777	405617
Qiang_Danba	Russia_Srubnaya	Tibetan_Nagqu	-0.001583	0.000571	-2.775	412363
Han_Henan	Tibetan_Lhasa	Tibetan_Nagqu	-0.001157	0.000417	-2.773	394871
Ilocano	Tibetan_Lhasa	Tibetan_Nagqu	-0.0016	0.000577	-2.773	389763
Malay	Tibetan_Lhasa	Tibetan_Nagqu	-0.001122	0.000405	-2.771	407002
Mogolian_HGDP	Tibetan_Shigatse	Tibetan_Nagqu	-0.00108	0.00039	-2.767	400164
BoY	Tibetan_Lhasa	Tibetan_Nagqu	-0.001216	0.00044	-2.762	399694
She_HGDP	Tibetan_Shannan	Tibetan_Nagqu	-0.001071	0.000389	-2.753	398879
Qiang_Danba	Mongolia_EBA_2_Chemurchek	Tibetan_Nagqu	-0.001758	0.000639	-2.749	336960
Qiang_Danba	Mordovian	Tibetan_Nagqu	-0.001423	0.000519	-2.744	443292
Ukrainian	Qiang_Danba	Tibetan_Nagqu	-0.001474	0.000537	-2.743	441357
Sherpa_Nepal	Tibetan_Gangcha	Tibetan_Nagqu	-0.001055	0.000386	-2.735	409011
Tibetan_Chamdo	Russia_Caucasus_EBA_Yamnaya	Tibetan_Nagqu	-0.001679	0.000614	-2.734	296391
Tibetan_Lhasa	Uyghur_HGDP	Tibetan_Nagqu	-0.001084	0.000397	-2.727	422771
BoY	Tibetan_Shannan	Tibetan_Nagqu	-0.001233	0.000454	-2.714	399777
Tibetan_Shannan	Dacaozi_IA	Tibetan_Nagqu	-0.001438	0.00053	-2.713	376844
LoLo	Tibetan_Shannan	Tibetan_Nagqu	-0.00116	0.000429	-2.706	397743
Tibetan_Shannan	Khovsgol_LBA	Tibetan_Nagqu	-0.00118	0.000437	-2.7	392078
Mulam_Luocheng	Tibetan_Chamdo	Tibetan_Nagqu	-0.000916	0.00034	-2.698	406596
Tibetan_Lhasa	Khakass_Koibals	Tibetan_Nagqu	-0.001203	0.000447	-2.693	403738
Dai_Xishuangbanna1k	Tibetan_Lhasa	Tibetan_Nagqu	-0.000961	0.000357	-2.691	417031
Han_Zhejiang	Tibetan_Shannan	Tibetan_Nagqu	-0.001199	0.000447	-2.679	394347
Li_Hainan	Tibetan_Lhasa	Tibetan_Nagqu	-0.001234	0.000461	-2.676	396215
Han_Beijing1K	Tibetan_Shigatse	Tibetan_Nagqu	-0.000856	0.00032	-2.673	418664
Tibetan_Shannan	Mongolia_EIA_7_Xiongnu	Tibetan_Nagqu	-0.001917	0.000719	-2.667	288411
Dong_Hunan	Tibetan_Lhasa	Tibetan_Nagqu	-0.001085	0.000408	-2.662	397809
Han_Chongqing	Tibetan_Shannan	Tibetan_Nagqu	-0.001241	0.000467	-2.658	391777
Tay	Tibetan_Shannan	Tibetan_Nagqu	-0.001057	0.000398	-2.655	400003
Tibetan_Chamdo	Mongolia_EBA_1_Ulgii	Tibetan_Nagqu	-0.001298	0.000489	-2.653	363704
Buryat_Aginsky	Tibetan_Shannan	Tibetan_Nagqu	-0.001062	0.000401	-2.649	411582
Nivkh	Tibetan_Shannan	Tibetan_Nagqu	-0.001249	0.000472	-2.643	396946
LoLo	Tibetan_Lhasa	Tibetan_Nagqu	-0.001102	0.000418	-2.639	397448
Han_Fujian	Tibetan_Shannan	Tibetan_Nagqu	-0.001163	0.000441	-2.636	394821
Han_Shanghai	Tibetan_Shannan	Tibetan_Nagqu	-0.001432	0.000543	-2.635	389948
Tibetan_Lhasa	Shirenzigou_IA_E	Tibetan_Nagqu	-0.0032	0.001215	-2.635	38687
Atayal	Tibetan_Lhasa	Tibetan_Nagqu	-0.001248	0.000474	-2.631	396673
Mongol_Minorities	Tibetan_Lhasa	Tibetan_Nagqu	-0.000979	0.000373	-2.627	410853
Tibetan_Chamdo	Nepal_Samdzong_1500BP	Tibetan_Nagqu	-0.001225	0.000467	-2.622	393564
Tibetan_Lhasa	Shor_Mountain	Tibetan_Nagqu	-0.00122	0.000466	-2.619	407397
PaThen	Tibetan_Lhasa	Tibetan_Nagqu	-0.001142	0.000436	-2.618	396741
Buryat_Duldurginsky	Tibetan_Lhasa	Tibetan_Nagqu	-0.001113	0.000425	-2.617	398321
Muong	Tibetan_Lhasa	Tibetan_Nagqu	-0.001011	0.000387	-2.612	402330
Tibetan_Shannan	Taiwan_Hanben	Tibetan_Nagqu	-0.001097	0.00042	-2.612	410314
Gurung_Nepal	Tibetan_Chamdo	Tibetan_Nagqu	-0.001013	0.000389	-2.606	398680
Sherpa_Nepal	Tibetan_Yajiang	Tibetan_Nagqu	-0.001125	0.000432	-2.606	393721
BoY	Tibetan_Shigatse	Tibetan_Nagqu	-0.001144	0.00044	-2.602	400989
Tibetan_Chamdo	Russia_Andronovo	Tibetan_Nagqu	-0.001501	0.000577	-2.601	403010
Baoan_Jishishan	Tibetan_Shigatse	Tibetan_Nagqu	-0.000898	0.000346	-2.593	407609
Tibetan_Chamdo	Kazakh	Tibetan_Nagqu	-0.000895	0.000346	-2.588	433062
Sherpa_Nepal	Yi_HGDP	Tibetan_Nagqu	-0.001106	0.000429	-2.577	394046
Han_SichuanHO	Tibetan_Shigatse	Tibetan_Nagqu	-0.001007	0.000391	-2.574	398597
Qiang_Danba	Russia_EarlySarmatian_SouthernUrals	Tibetan_Nagqu	-0.001563	0.000608	-2.57	303802
Han_Shandong	Tibetan_Chamdo	Tibetan_Nagqu	-0.000837	0.000326	-2.568	400511
Tibetan_Lhasa	Tujia_HGDP	Tibetan_Nagqu	-0.000982	0.000382	-2.568	400250
Dusun	Tibetan_Chamdo	Tibetan_Nagqu	-0.001016	0.000396	-2.568	401364
Vietnamese	Tibetan_Lhasa	Tibetan_Nagqu	-0.001008	0.000393	-2.566	399988
Qiang_Danba	Russia_Srubnaya_Alakul	Tibetan_Nagqu	-0.001494	0.000582	-2.565	415091
Mongolia_EIA_7_Xiongnu	Nepal_Samdzong_1500BP	Tibetan_Nagqu	-0.002827	0.001102	-2.565	275225
Mongol_Uuld	Tibetan_Shannan	Tibetan_Nagqu	-0.001021	0.000399	-2.56	411397
Sherpa_Nepal	Mongolia_Chalcolithic_2_Afanasievo	Tibetan_Nagqu	-0.002394	0.000938	-2.553	272131
Tibetan_Shannan	Russia_Shamanka_EBA	Tibetan_Nagqu	-0.001426	0.000559	-2.552	354259
Tharu_Nepal	Tibetan_Chamdo	Tibetan_Nagqu	-0.001051	0.000412	-2.55	407341
Dusun	Tibetan_Lhasa	Tibetan_Nagqu	-0.001113	0.000438	-2.541	400167
Tibetan_Lhasa	DevilsCave_N	Tibetan_Nagqu	-0.001475	0.000581	-2.539	391929
Tibetan_Shannan	Mongolia_EIA_8	Tibetan_Nagqu	-0.001973	0.000778	-2.537	291760
Tibetan_Lhasa	Dacaozi_IA	Tibetan_Nagqu	-0.001266	0.000499	-2.536	376911
Tibetan_Lhasa	Kazakh	Tibetan_Nagqu	-0.000921	0.000364	-2.534	432730
Kinh_Vietnam	Tibetan_Lhasa	Tibetan_Nagqu	-0.000999	0.000394	-2.534	402911
Tibetan_Shannan	Yukagir	Tibetan_Nagqu	-0.001016	0.000401	-2.531	420136
Tibetan_Lhasa	Mongolia_EIA_7_Xiongnu	Tibetan_Nagqu	-0.001931	0.000765	-2.524	288550
Buryat_Aginsky	Tibetan_Shigatse	Tibetan_Nagqu	-0.000924	0.000366	-2.523	412568
Tibetan_Lhasa	Jiaozuoniecun_LBIA	Tibetan_Nagqu	-0.001441	0.000571	-2.523	358615
Tibetan_Gangcha	Tibetan_Shannan	Tibetan_Nagqu	-0.000849	0.000338	-2.513	411467
Russian	Qiang_Danba	Tibetan_Nagqu	-0.001342	0.000534	-2.513	449395
Eskimo_ChaplinSireniki	Tibetan_Chamdo	Tibetan_Nagqu	-0.001133	0.000451	-2.511	400794
Han_Hubei	Tibetan_Lhasa	Tibetan_Nagqu	-0.001092	0.000435	-2.509	394756
Tibetan_Chamdo	Mongolia_LBA_4_CenterWest	Tibetan_Nagqu	-0.000928	0.000371	-2.503	396491
Tibetan_Chamdo	Khakass_Sagai	Tibetan_Nagqu	-0.000989	0.000395	-2.503	418865
Thai	Tibetan_Lhasa	Tibetan_Nagqu	-0.00093	0.000372	-2.499	416354
Mongol_Minorities	Tibetan_Shigatse	Tibetan_Nagqu	-0.00092	0.000369	-2.492	411734
Dao	Tibetan_Lhasa	Tibetan_Nagqu	-0.000973	0.000391	-2.486	400983
LaChi	Tibetan_Shannan	Tibetan_Nagqu	-0.001152	0.000464	-2.483	397341
Murut	Tibetan_Lhasa	Tibetan_Nagqu	-0.001102	0.000444	-2.479	398715
Tibetan_Shannan	Vietnam_Lahu	Tibetan_Nagqu	-0.001007	0.000407	-2.476	398431
Qiang_Danba	Veps	Tibetan_Nagqu	-0.001317	0.000532	-2.475	423655
Qiang_Danba	Chuvash	Tibetan_Nagqu	-0.001202	0.000486	-2.472	431937
She_HGDP	Tibetan_Shigatse	Tibetan_Nagqu	-0.000945	0.000383	-2.47	400054
Dai_HGDP	Tibetan_Lhasa	Tibetan_Nagqu	-0.000999	0.000405	-2.469	401581
Tibetan_Shannan	Ulchi	Tibetan_Nagqu	-0.00101	0.000409	-2.469	408839
Tibetan_Chamdo	Nogai2	Tibetan_Nagqu	-0.000954	0.000387	-2.465	426517
Kinh_HoChiMinh1K	Tibetan_Shigatse	Tibetan_Nagqu	-0.000845	0.000343	-2.463	422629
Tibetan_Shigatse	Tuvinian	Tibetan_Nagqu	-0.000868	0.000352	-2.463	421833
Tibetan_Shigatse	Mongolia_Chalcolithic_2_Afanasievo	Tibetan_Nagqu	-0.001903	0.000773	-2.461	281696
Tibetan_Gangcha	Tibetan_Shigatse	Tibetan_Nagqu	-0.00077	0.000313	-2.46	412052
Buryat_Ehirit	Tibetan_Shigatse	Tibetan_Nagqu	-0.000991	0.000403	-2.46	403967
Tibetan_Shannan	Russia_Shamanka_Eneolithic	Tibetan_Nagqu	-0.001133	0.000461	-2.46	398944
Korean	Tibetan_Shannan	Tibetan_Nagqu	-0.001049	0.000427	-2.456	395495
Maonan_Huanjiang	Tibetan_Shannan	Tibetan_Nagqu	-0.000987	0.000402	-2.455	405731
Koryak	Tibetan_Shannan	Tibetan_Nagqu	-0.00122	0.000498	-2.452	398931
Tibetan_Chamdo	Russia_Sarmatian	Tibetan_Nagqu	-0.001405	0.000573	-2.452	345078
Dao	Tibetan_Shigatse	Tibetan_Nagqu	-0.000947	0.000387	-2.448	401988
Maonan_Huanjiang	Tibetan_Chamdo	Tibetan_Nagqu	-0.000846	0.000347	-2.439	406106
Cham	Tibetan_Lhasa	Tibetan_Nagqu	-0.000943	0.000387	-2.439	409246
KhoMu	Tibetan_Lhasa	Tibetan_Nagqu	-0.000978	0.000401	-2.439	403132
Han_Fujian	Tibetan_Lhasa	Tibetan_Nagqu	-0.00102	0.000418	-2.439	394918
Tibetan_Shannan	Chuanyun_H	Tibetan_Nagqu	-0.002051	0.000841	-2.439	125830
Mongol_Sainnoyon	Tibetan_Shigatse	Tibetan_Nagqu	-0.000892	0.000368	-2.424	407587
Khamnegan	Tibetan_Lhasa	Tibetan_Nagqu	-0.000968	0.000399	-2.424	404989
Tibetan_Shigatse	Kirghiz	Tibetan_Nagqu	-0.001069	0.000442	-2.42	404534
Tibetan_Lhasa	Wadian_LN	Tibetan_Nagqu	-0.001333	0.000551	-2.42	387275
Mulam_Luocheng	Tibetan_Shigatse	Tibetan_Nagqu	-0.000902	0.000374	-2.413	406794
Tibetan_Lhasa	Xibo_HGDP	Tibetan_Nagqu	-0.000968	0.000401	-2.413	399782
Russian_Pinezhsky	Qiang_Danba	Tibetan_Nagqu	-0.001333	0.000553	-2.411	417023
Yi_HGDP	Nepal_Samdzong_1500BP	Tibetan_Nagqu	-0.001242	0.000517	-2.405	392773
Kalmyk	Tibetan_Shannan	Tibetan_Nagqu	-0.000943	0.000393	-2.402	413101
Russian_Leshukonsky	Qiang_Danba	Tibetan_Nagqu	-0.001307	0.000544	-2.402	415493
Tibetan_Chamdo	Mongolia_BA_2	Tibetan_Nagqu	-0.001772	0.000738	-2.401	205009
Han_Henan	Tibetan_Shannan	Tibetan_Nagqu	-0.001043	0.000435	-2.396	394811
Tibetan_Shannan	Pingliangtai_LN	Tibetan_Nagqu	-0.001246	0.00052	-2.395	390620
Abkhasian	Qiang_Danba	Tibetan_Nagqu	-0.001338	0.00056	-2.39	429783
Cham	Tibetan_Chamdo	Tibetan_Nagqu	-0.000872	0.000366	-2.384	409930
Qiang_Danba	Nepal_Chokhopani_2700BP	Tibetan_Nagqu	-0.001752	0.000735	-2.382	387357
Tibetan_Lhasa	Russia_UstBelaya_Angara	Tibetan_Nagqu	-0.001092	0.000459	-2.379	379917
Russian_HGDP	Qiang_Danba	Tibetan_Nagqu	-0.001241	0.000522	-2.379	438604
Kurd	Qiang_Danba	Tibetan_Nagqu	-0.001362	0.000573	-2.379	426100
Dai_Xishuangbanna1k	Tibetan_Shannan	Tibetan_Nagqu	-0.000876	0.000369	-2.373	417221
Mongol_Sainnoyon	Tibetan_Lhasa	Tibetan_Nagqu	-0.000922	0.000389	-2.371	406740
Kinh_HoChiMinh1K	Tibetan_Chamdo	Tibetan_Nagqu	-0.000752	0.000317	-2.37	422128
Aleut	Tibetan_Chamdo	Tibetan_Nagqu	-0.001093	0.000461	-2.37	418361
Cambodian	Tibetan_Chamdo	Tibetan_Nagqu	-0.000898	0.000379	-2.367	407494
Qiang_Danba	Russia_Caucasus_EBA_Yamnaya	Tibetan_Nagqu	-0.001536	0.00065	-2.364	294529
Baoan_Jishishan	Tibetan_Lhasa	Tibetan_Nagqu	-0.000859	0.000363	-2.363	406500
Tibetan_Chamdo	Tatar_Zabolotniye	Tibetan_Nagqu	-0.001113	0.000471	-2.362	409400
Tibetan_Shannan	Evenk_Transbaikal	Tibetan_Nagqu	-0.001051	0.000445	-2.36	401518
Tibetan_Shigatse	Mongolia_EBA_1_Ulgii	Tibetan_Nagqu	-0.001159	0.000491	-2.359	362806
Tibetan_Lhasa	Nganasan	Tibetan_Nagqu	-0.000989	0.000421	-2.349	409704
Thai	Tibetan_Chamdo	Tibetan_Nagqu	-0.00081	0.000345	-2.348	416578
Dungan	Tibetan_Lhasa	Tibetan_Nagqu	-0.000827	0.000353	-2.347	413730
KhoMu	Tibetan_Chamdo	Tibetan_Nagqu	-0.000886	0.000378	-2.345	404110
Tibetan_Chamdo	Altaian_Chelkans	Tibetan_Nagqu	-0.001011	0.000432	-2.34	410074
Tibetan_Shannan	Dolgan	Tibetan_Nagqu	-0.001133	0.000484	-2.34	399868
Han_Guangdong	Tibetan_Shigatse	Tibetan_Nagqu	-0.000915	0.000391	-2.338	399607
Qiang_Danba	Tatar_Mishar	Tibetan_Nagqu	-0.001185	0.000508	-2.334	427391
Malay	Tibetan_Chamdo	Tibetan_Nagqu	-0.000892	0.000383	-2.328	407865
Tibetan_Lhasa	Xiaowu_MN	Tibetan_Nagqu	-0.001641	0.000705	-2.327	382217
Hmong	Tibetan_Shannan	Tibetan_Nagqu	-0.00099	0.000426	-2.323	402794
Han_SichuanHO	Sherpa_Nepal	Tibetan_Nagqu	-0.001108	0.000478	-2.321	390915
Tibetan_Lhasa	Russia_Lokomotiv_Eneolithic	Tibetan_Nagqu	-0.001294	0.000558	-2.32	343398
Tibetan_Lhasa	Vietnam_Lahu	Tibetan_Nagqu	-0.000899	0.000387	-2.319	398498
Ket	Tibetan_Chamdo	Tibetan_Nagqu	-0.000963	0.000416	-2.314	416299
Tibetan_Shannan	Luoheguxiang_LBIA	Tibetan_Nagqu	-0.001336	0.000577	-2.314	357640
Dai_Xishuangbanna1k	Tibetan_Shigatse	Tibetan_Nagqu	-0.000794	0.000343	-2.313	417569
Tajik_Lowland	Qiang_Danba	Tibetan_Nagqu	-0.00119	0.000515	-2.311	429576
Russian_Krasnoborsky	Tibetan_Chamdo	Tibetan_Nagqu	-0.001178	0.00051	-2.309	419967
Tibetan_Chamdo	Even	Tibetan_Nagqu	-0.000916	0.000397	-2.307	416678
Kinh_HGDP	Tibetan_Shigatse	Tibetan_Nagqu	-0.000898	0.00039	-2.306	402722
Ilocano	Tibetan_Shigatse	Tibetan_Nagqu	-0.001259	0.000546	-2.306	391342
Circassian	Qiang_Danba	Tibetan_Nagqu	-0.001249	0.000543	-2.301	427074
Dungan	Tibetan_Shannan	Tibetan_Nagqu	-0.000846	0.000368	-2.298	413572
Ede	Tibetan_Lhasa	Tibetan_Nagqu	-0.000931	0.000405	-2.298	407583
Vietnamese	Tibetan_Shannan	Tibetan_Nagqu	-0.00094	0.00041	-2.295	400184
Tibetan_Chamdo	Khovsgol_LBA	Tibetan_Nagqu	-0.000886	0.000387	-2.29	394072
CoLao	Tibetan_Shannan	Tibetan_Nagqu	-0.001001	0.000437	-2.29	397074
Zhuang_Guangxi	Tibetan_Shannan	Tibetan_Nagqu	-0.000865	0.000378	-2.289	407708
Sherpa_Nepal	Hezhen_HGDP	Tibetan_Nagqu	-0.001115	0.000488	-2.287	393654
Tibetan_Lhasa	Evenk_Transbaikal	Tibetan_Nagqu	-0.00095	0.000417	-2.279	401581
Tibetan_Shannan	Haojiatai_LN	Tibetan_Nagqu	-0.001411	0.000621	-2.273	289968
Kinh_Vietnam	Tibetan_Chamdo	Tibetan_Nagqu	-0.000824	0.000363	-2.269	403484
Tibetan_Shigatse	Taiwan_Hanben	Tibetan_Nagqu	-0.000918	0.000405	-2.266	411380
Maonan_Huanjiang	Tibetan_Shigatse	Tibetan_Nagqu	-0.000835	0.000369	-2.263	406530
Baoan_Jishishan	Tibetan_Shannan	Tibetan_Nagqu	-0.000858	0.00038	-2.259	406589
Buryat_Duldurginsky	Tibetan_Shigatse	Tibetan_Nagqu	-0.000963	0.000427	-2.255	399611
Tibetan_Gannan	Tibetan_Shannan	Tibetan_Nagqu	-0.000965	0.000428	-2.254	398851
Tibetan_Shannan	Mongolia_N_East	Tibetan_Nagqu	-0.001277	0.000567	-2.254	347894
Tibetan_Lhasa	Karakalpak	Tibetan_Nagqu	-0.000874	0.000389	-2.248	433850
Ilocano	Tibetan_Chamdo	Tibetan_Nagqu	-0.00119	0.00053	-2.245	392001
Sherpa_Nepal	Shor_Mountain	Tibetan_Nagqu	-0.001265	0.000564	-2.24	401718
Tibetan_Shannan	Wanggou_MN	Tibetan_Nagqu	-0.00122	0.000548	-2.226	322738
Sherpa_Nepal	Evenk_FarEast	Tibetan_Nagqu	-0.00153	0.000688	-2.225	379958
Tibetan_Chamdo	Nepal_Chokhopani_2700BP	Tibetan_Nagqu	-0.00148	0.000666	-2.223	390881
Tibetan_Shigatse	Russia_Shamanka_EBA	Tibetan_Nagqu	-0.001188	0.000536	-2.217	356018
Murut	Tibetan_Shannan	Tibetan_Nagqu	-0.000983	0.000444	-2.215	398525
Ilocano	Tibetan_Shannan	Tibetan_Nagqu	-0.001308	0.000591	-2.213	389781
Kinh_HGDP	Tibetan_Shannan	Tibetan_Nagqu	-0.000921	0.000416	-2.212	401507
Tibetan_Lhasa	Haojiatai_LN	Tibetan_Nagqu	-0.001312	0.000594	-2.211	289971
Nung	Tibetan_Shannan	Tibetan_Nagqu	-0.000884	0.0004	-2.21	400946
Zhuang_Guangxi	Tibetan_Chamdo	Tibetan_Nagqu	-0.000753	0.000341	-2.209	408101
Qiang_Daofu	Nepal_Mebrak_2125BP	Tibetan_Nagqu	-0.00161	0.000729	-2.208	269497
Tibetan_Shigatse	Longtoushan_BA	Tibetan_Nagqu	-0.00138	0.000625	-2.207	220091
Tibetan_Shigatse	Vietnam_Lahu	Tibetan_Nagqu	-0.000844	0.000383	-2.203	399470
Tibetan_Shannan	Yakut_HGDP	Tibetan_Nagqu	-0.000883	0.000401	-2.201	415663
Han_Shanghai	Tibetan_Lhasa	Tibetan_Nagqu	-0.001176	0.000535	-2.2	390000
Zhuang_Guangxi	Tibetan_Shigatse	Tibetan_Nagqu	-0.000812	0.000369	-2.199	408463
Maonan_Huanjiang	Tibetan_Lhasa	Tibetan_Nagqu	-0.000857	0.00039	-2.199	405490
Ami	Tibetan_Chamdo	Tibetan_Nagqu	-0.00092	0.000419	-2.194	400159
Tibetan_Shannan	Khakass_Koibals	Tibetan_Nagqu	-0.001014	0.000462	-2.194	403619
Tibetan_Chamdo	Russia_UstBelaya_Angara	Tibetan_Nagqu	-0.000946	0.000432	-2.19	382122
Chukchi	Tibetan_Shannan	Tibetan_Nagqu	-0.001021	0.000468	-2.18	407486
Qiang_Danba	Russia_Late_Sarmatian	Tibetan_Nagqu	-0.001279	0.000587	-2.179	383189
Tibetan_Shannan	Mongolia_BA_2	Tibetan_Nagqu	-0.00179	0.000822	-2.179	203488
Qiang_Danba	Karelian	Tibetan_Nagqu	-0.001173	0.000538	-2.178	431758
Tibetan_Lhasa	Mogushan_Xianbei_IA	Tibetan_Nagqu	-0.001776	0.00082	-2.166	102427
Ossetian	Qiang_Danba	Tibetan_Nagqu	-0.001125	0.000521	-2.161	436105
Tibetan_Lhasa	Mongolia_EBA_1_Ulgii	Tibetan_Nagqu	-0.001112	0.000518	-2.149	361319
Tibetan_Chamdo	Khakass_Kachins	Tibetan_Nagqu	-0.000868	0.000404	-2.148	409339
Tibetan_Shigatse	Evenk_Transbaikal	Tibetan_Nagqu	-0.000893	0.000416	-2.146	402796
Gelao_Longlin	Tibetan_Chamdo	Tibetan_Nagqu	-0.00078	0.000364	-2.145	401839
Murut	Tibetan_Chamdo	Tibetan_Nagqu	-0.000877	0.000409	-2.145	399897
Tibetan_Shigatse	Mongolia_N_East	Tibetan_Nagqu	-0.001232	0.000574	-2.145	349560
Tibetan_Yajiang	Nepal_Mebrak_2125BP	Tibetan_Nagqu	-0.001646	0.00077	-2.138	268124
Sherpa_Nepal	Zhalainuoer_IA	Tibetan_Nagqu	-0.004165	0.001948	-2.138	20668
Tibetan_Shigatse	Oroqen_HGDP	Tibetan_Nagqu	-0.000813	0.000381	-2.134	402490
Tibetan_Shigatse	Russia_Shamanka_Eneolithic	Tibetan_Nagqu	-0.000924	0.000433	-2.132	400350
Ami	Tibetan_Shannan	Tibetan_Nagqu	-0.000982	0.00046	-2.132	398911
Tibetan_Yajiang	Nepal_Chokhopani_2700BP	Tibetan_Nagqu	-0.001582	0.000744	-2.127	388779
Tibetan_Chamdo	Altaian	Tibetan_Nagqu	-0.000745	0.000352	-2.121	431845
Han_Jiangsu	Tibetan_Shigatse	Tibetan_Nagqu	-0.000815	0.000384	-2.12	397991
Ami	Tibetan_Lhasa	Tibetan_Nagqu	-0.000932	0.000443	-2.106	398784
Cambodian	Tibetan_Lhasa	Tibetan_Nagqu	-0.000854	0.000406	-2.105	406308
Tibetan_Chamdo	Shor_Khakassia	Tibetan_Nagqu	-0.000989	0.00047	-2.102	404866
CoLao	Tibetan_Chamdo	Tibetan_Nagqu	-0.000802	0.000382	-2.099	398050
Tajik_Mountain	Qiang_Danba	Tibetan_Nagqu	-0.001053	0.000502	-2.098	429451
Tibetan_Lhasa	Altaian	Tibetan_Nagqu	-0.000781	0.000373	-2.097	431445
Ami	Tibetan_Shigatse	Tibetan_Nagqu	-0.000872	0.000416	-2.096	400293
Sherpa_Nepal	Tibetan_Xinlong	Tibetan_Nagqu	-0.000899	0.000429	-2.096	395515
Buryat_Zakamensky	Tibetan_Shannan	Tibetan_Nagqu	-0.000911	0.000434	-2.096	403226
Mongol_Uuld	Sherpa_Nepal	Tibetan_Nagqu	-0.000966	0.000461	-2.096	407488
Eskimo_Naukan	Tibetan_Chamdo	Tibetan_Nagqu	-0.000969	0.000463	-2.094	401089
Abazin	Qiang_Danba	Tibetan_Nagqu	-0.001127	0.000538	-2.094	425199
Tibetan_Shannan	Bianbian_EN	Tibetan_Nagqu	-0.00159	0.000759	-2.094	262783
Mongolia_EIA_7_Xiongnu	Nepal_Mebrak_2125BP	Tibetan_Nagqu	-0.003813	0.001823	-2.092	190721
Tibetan_Shannan	Shirenzigou_IA	Tibetan_Nagqu	-0.001267	0.000607	-2.088	279507
Tibetan_Lhasa	Taiwan_Hanben	Tibetan_Nagqu	-0.000855	0.000411	-2.083	410140
Tibetan_Chamdo	Vietnam_Lahu	Tibetan_Nagqu	-0.000763	0.000366	-2.081	399337
Han_Shanxi	Sherpa_Nepal	Tibetan_Nagqu	-0.000963	0.000463	-2.078	392899
Tibetan_Lhasa	Chuanyun_H	Tibetan_Nagqu	-0.001804	0.000868	-2.078	125886
Tibetan_Lhasa	Kazakh_Aksay	Tibetan_Nagqu	-0.00082	0.000395	-2.074	412458
Vietnamese	Tibetan_Shigatse	Tibetan_Nagqu	-0.000774	0.000374	-2.072	401091
Tibetan_Lhasa	Erdaojingzi_LN	Tibetan_Nagqu	-0.001125	0.000544	-2.068	332585
Tibetan_Chamdo	Russia_OldBeringSea_Ekven	Tibetan_Nagqu	-0.000922	0.000446	-2.067	397073
Tibetan_Shannan	Khakass_Sagai	Tibetan_Nagqu	-0.000941	0.000455	-2.067	417786
Tibetan_Chamdo	Kazakh_Aksay	Tibetan_Nagqu	-0.000777	0.000377	-2.062	413332
Miao_HGDP	Tibetan_Lhasa	Tibetan_Nagqu	-0.000766	0.000372	-2.06	399735
Cong	Tibetan_Shigatse	Tibetan_Nagqu	-0.000795	0.000386	-2.06	402325
Tibetan_Lhasa	Longtoushan_BA	Tibetan_Nagqu	-0.00135	0.000656	-2.058	219123
Thai	Tibetan_Shannan	Tibetan_Nagqu	-0.000812	0.000396	-2.049	416382
Tibetan_Chamdo	Mongolia_N_North	Tibetan_Nagqu	-0.000942	0.00046	-2.049	380362
Tibetan_Xinlong	Nepal_Samdzong_1500BP	Tibetan_Nagqu	-0.000977	0.000477	-2.048	394321
Tibetan_Shigatse	Uyghur_HGDP	Tibetan_Nagqu	-0.000812	0.000397	-2.046	423410
Tibetan_Lhasa	Mongolia_IA_Xianbei	Tibetan_Nagqu	-0.001598	0.000783	-2.042	302284
Tibetan_Shannan	Khakass_Kachins	Tibetan_Nagqu	-0.00092	0.000451	-2.04	407841
Eskimo_ChaplinSireniki	Tibetan_Lhasa	Tibetan_Nagqu	-0.000969	0.000476	-2.036	399047
Chukchi	Tibetan_Lhasa	Tibetan_Nagqu	-0.000905	0.000445	-2.031	407698
Qiang_Danba	Kumyk	Tibetan_Nagqu	-0.001109	0.000546	-2.03	428007
Mongol_Uuld	Tibetan_Chamdo	Tibetan_Nagqu	-0.000689	0.00034	-2.029	412158
Tu_HGDP	Tibetan_Shigatse	Tibetan_Nagqu	-0.00072	0.000355	-2.028	405477
HaNhi	Tibetan_Chamdo	Tibetan_Nagqu	-0.000695	0.000344	-2.022	400345
Tibetan_Chamdo	Ekven_IA	Tibetan_Nagqu	-0.000946	0.00047	-2.013	397541
Qiang_Danba	Russia_North_Caucasus	Tibetan_Nagqu	-0.00123	0.000612	-2.009	316285
PhuLa	Tibetan_Shigatse	Tibetan_Nagqu	-0.000754	0.000376	-2.004	400575
Tibetan_Xinlong	Nepal_Mebrak_2125BP	Tibetan_Nagqu	-0.001472	0.000735	-2.004	269898
Cong	Tibetan_Shannan	Tibetan_Nagqu	-0.000815	0.000407	-2.003	401278
Tay	Tibetan_Lhasa	Tibetan_Nagqu	-0.000804	0.000402	-2.001	399717
Sherpa_Nepal	Salar_Xunhua	Tibetan_Nagqu	-0.000919	0.000459	-2.001	403733
Tibetan_Shigatse	Wanggou_MN	Tibetan_Nagqu	-0.000998	0.0005	-1.998	324334
Kinh_HGDP	Tibetan_Chamdo	Tibetan_Nagqu	-0.000729	0.000365	-1.997	402702
Buryat_Selenginsky	Sherpa_Nepal	Tibetan_Nagqu	-0.001073	0.000538	-1.992	394793
Qiang_Danba	Russia_Sarmatian	Tibetan_Nagqu	-0.001196	0.0006	-1.991	342883
Cong	Tibetan_Lhasa	Tibetan_Nagqu	-0.000828	0.000417	-1.988	401200
Li_Hainan	Tibetan_Shigatse	Tibetan_Nagqu	-0.000906	0.000456	-1.986	397655
Tay	Tibetan_Shigatse	Tibetan_Nagqu	-0.00075	0.000378	-1.985	400883
Tibetan_Shannan	Salar_Xunhua	Tibetan_Nagqu	-0.000762	0.000384	-1.984	408404
Tibetan_Shannan	Russia_UstIda_EBA	Tibetan_Nagqu	-0.001148	0.000578	-1.984	290196
Tibetan_Shannan	Mongolia_MBA_2_Munkhkhairkhan	Tibetan_Nagqu	-0.001509	0.000762	-1.979	303897
PhuLa	Tibetan_Shannan	Tibetan_Nagqu	-0.000788	0.000399	-1.978	399564
Nung	Tibetan_Shigatse	Tibetan_Nagqu	-0.000762	0.000386	-1.971	401838
Li_Hainan	Tibetan_Chamdo	Tibetan_Nagqu	-0.000831	0.000422	-1.968	397993
Han_Zhejiang	Tibetan_Shigatse	Tibetan_Nagqu	-0.000799	0.000407	-1.966	395751
Miao_HGDP	Tibetan_Shigatse	Tibetan_Nagqu	-0.000738	0.000376	-1.962	401030
Sherpa_Nepal	Evenk_Transbaikal	Tibetan_Nagqu	-0.001051	0.000536	-1.959	395521
Kalmyk	Tibetan_Shigatse	Tibetan_Nagqu	-0.000742	0.000379	-1.956	413984
Tibetan_Shannan	Xiaowu_MN	Tibetan_Nagqu	-0.001413	0.000725	-1.949	382057
Tibetan_Shannan	Mongolia_MBA_1_Munkhkhairkhan	Tibetan_Nagqu	-0.001142	0.000586	-1.947	359716
KhoMu	Tibetan_Shigatse	Tibetan_Nagqu	-0.000775	0.000398	-1.946	404291
Tibetan_Shigatse	Nganasan	Tibetan_Nagqu	-0.000817	0.00042	-1.944	410630
Han_Henan	Tibetan_Shigatse	Tibetan_Nagqu	-0.000764	0.000393	-1.943	396210
Tibetan_Lhasa	Russia_Shamanka_EBA	Tibetan_Nagqu	-0.001067	0.000549	-1.943	354265
Tibetan_Shannan	Kyrgyz_Urumqi	Tibetan_Nagqu	-0.000779	0.000401	-1.942	423185
Li_Hainan	Tibetan_Shannan	Tibetan_Nagqu	-0.000962	0.000496	-1.941	396372
Ingushian	Qiang_Danba	Tibetan_Nagqu	-0.001071	0.000552	-1.941	428542
Tibetan_Shigatse	Kyrgyz_Urumqi	Tibetan_Nagqu	-0.000733	0.000379	-1.931	423787
Mongol_Sainnoyon	Tibetan_Shannan	Tibetan_Nagqu	-0.000778	0.000403	-1.93	406520
Tibetan_Lhasa	Khakass_Sagai	Tibetan_Nagqu	-0.000798	0.000414	-1.929	417650
Koryak	Tibetan_Lhasa	Tibetan_Nagqu	-0.00093	0.000483	-1.927	398997
Tibetan_Shigatse	Yukagir	Tibetan_Nagqu	-0.000735	0.000382	-1.926	420907
Tibetan_Lhasa	Mansi	Tibetan_Nagqu	-0.000891	0.000463	-1.926	415312
Han_Guangdong	Sherpa_Nepal	Tibetan_Nagqu	-0.000929	0.000482	-1.926	391998
Tibetan_Chamdo	Russia_UstIda_EBA	Tibetan_Nagqu	-0.001019	0.00053	-1.922	292306
Tibetan_Chamdo	Tanshishan_LN	Tibetan_Nagqu	-0.001284	0.000669	-1.921	159925
Tibetan_Shigatse	Mongolia_EIA_7_Xiongnu	Tibetan_Nagqu	-0.001378	0.000718	-1.918	289947
Buryat_Bohansky	Tibetan_Shannan	Tibetan_Nagqu	-0.000863	0.00045	-1.917	398323
Giarai	Tibetan_Chamdo	Tibetan_Nagqu	-0.00072	0.000376	-1.912	409325
Tibetan_Shigatse	Tibetan_Xunhua	Tibetan_Nagqu	-0.000867	0.000455	-1.908	396609
Sherpa_Nepal	Russia_Shamanka_EBA	Tibetan_Nagqu	-0.001286	0.000674	-1.908	344696
Tibetan_Lhasa	Yumin_EN	Tibetan_Nagqu	-0.00143	0.000749	-1.908	319203
Tibetan_Lhasa	Bashkir_south	Tibetan_Nagqu	-0.000807	0.000423	-1.906	434856
Nung	Tibetan_Lhasa	Tibetan_Nagqu	-0.000728	0.000383	-1.901	400853
Tibetan_Lhasa	Even	Tibetan_Nagqu	-0.000768	0.000405	-1.9	415629
Sherpa_Nepal	Jiaozuoniecun_LBIA	Tibetan_Nagqu	-0.001413	0.000748	-1.89	348397
Dungan	Tibetan_Shigatse	Tibetan_Nagqu	-0.000649	0.000343	-1.889	414334
Tibetan_Shigatse	Yumin_EN	Tibetan_Nagqu	-0.001364	0.000722	-1.888	320744
Tibetan_Shannan	Russia_Lokomotiv_Eneolithic	Tibetan_Nagqu	-0.001057	0.000561	-1.884	343361
Tibetan_Shigatse	Russia_Lokomotiv_Eneolithic	Tibetan_Nagqu	-0.001029	0.000546	-1.883	344949
Tibetan_Shigatse	Yakut_HGDP	Tibetan_Nagqu	-0.000724	0.000385	-1.881	416283
Sherpa_Nepal	Yakut_HGDP	Tibetan_Nagqu	-0.000903	0.00048	-1.88	412600
Tibetan_Shigatse	DevilsCave_N	Tibetan_Nagqu	-0.001079	0.000574	-1.88	393692
Tibetan_Chamdo	Nganasan	Tibetan_Nagqu	-0.000757	0.000403	-1.878	410520
Tibetan_Shigatse	Mongolia_IA_Xianbei	Tibetan_Nagqu	-0.001378	0.000735	-1.874	303733
Tibetan_Lhasa	Mongolia_BA_2	Tibetan_Nagqu	-0.001557	0.000831	-1.873	203515
Sila	Tibetan_Lhasa	Tibetan_Nagqu	-0.000781	0.000417	-1.872	396108
Tibetan_Shannan	Xiaojingshan_EN	Tibetan_Nagqu	-0.001178	0.00063	-1.87	217786
Tibetan_Chamdo	Shirenzigou_IA_E	Tibetan_Nagqu	-0.002126	0.001137	-1.87	38949
Murut	Tibetan_Shigatse	Tibetan_Nagqu	-0.000782	0.000419	-1.864	399818
Tibetan_Lhasa	XiongNu_WE	Tibetan_Nagqu	-0.001232	0.000662	-1.861	357929
Han_Beijing1K	Sherpa_Nepal	Tibetan_Nagqu	-0.000737	0.000397	-1.859	416355
Sherpa_Nepal	Dacaozi_IA	Tibetan_Nagqu	-0.001163	0.000626	-1.858	366515
Sherpa_Nepal	Tibetan_Xunhua	Tibetan_Nagqu	-0.001068	0.000575	-1.856	386665
Sherpa_Nepal	Haojiatai_LN	Tibetan_Nagqu	-0.00142	0.000766	-1.853	281557
Tibetan_Lhasa	Tofalar	Tibetan_Nagqu	-0.000769	0.000416	-1.851	406878
Tagalog	Tibetan_Shannan	Tibetan_Nagqu	-0.000825	0.000446	-1.85	398037
Gelao_Longlin	Tibetan_Shigatse	Tibetan_Nagqu	-0.000714	0.000388	-1.842	401908
Tibetan_Chamdo	Tofalar	Tibetan_Nagqu	-0.000711	0.000387	-1.838	408062
Miao_HGDP	Tibetan_Shannan	Tibetan_Nagqu	-0.000754	0.000411	-1.835	399818
Buryat_Duldurginsky	Tibetan_Shannan	Tibetan_Nagqu	-0.000853	0.000466	-1.831	398351
Tibetan_Shigatse	Shirenzigou_IA_E	Tibetan_Nagqu	-0.002155	0.001177	-1.831	38888
Qiang_Danba	Russia_BA_Okunevo	Tibetan_Nagqu	-0.000924	0.000506	-1.828	409188
Tibetan_Shannan	Haojiatai_LBIA	Tibetan_Nagqu	-0.00141	0.000771	-1.828	307746
Sherpa_Nepal	Sila	Tibetan_Nagqu	-0.000969	0.000531	-1.825	390094
Tibetan_Shigatse	Even	Tibetan_Nagqu	-0.000736	0.000404	-1.822	416622
Qiang_Danba	Russia_Karasuk	Tibetan_Nagqu	-0.000918	0.000504	-1.82	408306
Tibetan_Lhasa	Shor_Khakassia	Tibetan_Nagqu	-0.000908	0.0005	-1.817	402978
Mulam_Luocheng	Sherpa_Nepal	Tibetan_Nagqu	-0.000852	0.00047	-1.816	401833
Tibetan_Chamdo	Mongolia_EIA_7_Xiongnu	Tibetan_Nagqu	-0.00127	0.000699	-1.816	290584
Eskimo_ChaplinSireniki	Tibetan_Shigatse	Tibetan_Nagqu	-0.000817	0.000452	-1.81	400274
Han_Hubei	Tibetan_Shannan	Tibetan_Nagqu	-0.000782	0.000433	-1.808	394612
Tibetan_Chamdo	Hezhen_HGDP	Tibetan_Nagqu	-0.000651	0.000361	-1.803	400889
Chukchi	Tibetan_Chamdo	Tibetan_Nagqu	-0.000733	0.000407	-1.8	408586
Khamnegan	Tibetan_Shannan	Tibetan_Nagqu	-0.000746	0.000415	-1.799	404879
Dusun	Tibetan_Shigatse	Tibetan_Nagqu	-0.000737	0.000411	-1.792	401605
Buryat_Aginsky	Tibetan_Chamdo	Tibetan_Nagqu	-0.000618	0.000345	-1.791	412360
Atayal	Tibetan_Shannan	Tibetan_Nagqu	-0.000854	0.000477	-1.789	396863
Qiang_Daofu	Russia_Steppe_Maikop	Tibetan_Nagqu	-0.00105	0.000587	-1.789	364804
Mang	Tibetan_Shannan	Tibetan_Nagqu	-0.000795	0.000445	-1.788	397393
Nanai	Nepal_Samdzong_1500BP	Tibetan_Nagqu	-0.001043	0.000588	-1.776	391020
Buryat_Zakamensky	Sherpa_Nepal	Tibetan_Nagqu	-0.000928	0.000523	-1.775	397446
HaNhi	Sherpa_Nepal	Tibetan_Nagqu	-0.000836	0.000472	-1.773	394489
Tibetan_Lhasa	Uzbek_Khorezm	Tibetan_Nagqu	-0.000824	0.000465	-1.772	415725
Buryat_Aginsky	Sherpa_Nepal	Tibetan_Nagqu	-0.000814	0.000461	-1.768	407648
Tibetan_Shigatse	Negidal	Tibetan_Nagqu	-0.000847	0.000479	-1.768	392559
Tagalog	Tibetan_Shigatse	Tibetan_Nagqu	-0.000723	0.000409	-1.767	399339
Tibetan_Lhasa	Mongolia_LBA_3_MongunTaiga	Tibetan_Nagqu	-0.000985	0.000557	-1.767	363705
Sherpa_Nepal	Even	Tibetan_Nagqu	-0.000913	0.000517	-1.766	411789
Tibetan_Chamdo	Mongolia_EIA_1_SlabGrave	Tibetan_Nagqu	-0.000689	0.00039	-1.765	393419
Tibetan_Chamdo	Kirghiz	Tibetan_Nagqu	-0.000758	0.000429	-1.765	404900
Tibetan_Shigatse	Pingliangtai_LN	Tibetan_Nagqu	-0.000913	0.000519	-1.76	392430
Qiang_Danba	Bashkir_north	Tibetan_Nagqu	-0.000839	0.000477	-1.758	436127
Tibetan_Lhasa	Tanshishan_LN	Tibetan_Nagqu	-0.001199	0.000683	-1.755	158806
Russia_Late_Sarmatian	Jinchankou_LN	Tibetan_Nagqu	-0.002496	0.001424	-1.753	260352
Tibetan_Lhasa	XiongNu	Tibetan_Nagqu	-0.000921	0.000526	-1.752	391715
Russia_EBA_Yamnaya_Kalmykia	Jinchankou_LN	Tibetan_Nagqu	-0.002548	0.001458	-1.748	263552
Tibetan_Shigatse	Bianbian_EN	Tibetan_Nagqu	-0.001273	0.000729	-1.747	264206
BoY	Tibetan_Chamdo	Tibetan_Nagqu	-0.000703	0.000404	-1.739	401039
Tibetan_Chamdo	Selkup	Tibetan_Nagqu	-0.000721	0.000414	-1.739	425550
Buryat_Zakamensky	Tibetan_Lhasa	Tibetan_Nagqu	-0.000726	0.00042	-1.728	403435
Kankanaey	Tibetan_Shannan	Tibetan_Nagqu	-0.000817	0.000473	-1.728	396270
Tibetan_Lhasa	Salar_Xunhua	Tibetan_Nagqu	-0.000653	0.000378	-1.727	408568
Dong_Guizhou	Sherpa_Nepal	Tibetan_Nagqu	-0.000799	0.000463	-1.725	399912
Sherpa_Nepal	Mongolia_EIA_1_SlabGrave	Tibetan_Nagqu	-0.00085	0.000493	-1.725	383858
Tibetan_Shigatse	Salar_Xunhua	Tibetan_Nagqu	-0.000636	0.00037	-1.721	409510
Ingushian	Jinchankou_LN	Tibetan_Nagqu	-0.00204	0.001186	-1.72	300541
Tibetan_Chamdo	Zhalainuoer_IA	Tibetan_Nagqu	-0.002327	0.001353	-1.72	21487
Tay	Tibetan_Chamdo	Tibetan_Nagqu	-0.000625	0.000364	-1.717	400821
Tibetan_Shannan	Russia_OldBeringSea_Ekven	Tibetan_Nagqu	-0.00087	0.000506	-1.717	395042
Tibetan_Shannan	Uyghur_HGDP	Tibetan_Nagqu	-0.000736	0.000429	-1.716	422678
Tibetan_Chamdo	Khakass_Koibals	Tibetan_Nagqu	-0.000745	0.000434	-1.716	405399
Kankanaey	Tibetan_Lhasa	Tibetan_Nagqu	-0.000786	0.000458	-1.715	396109
Tibetan_Shannan	Negidal	Tibetan_Nagqu	-0.000878	0.000512	-1.713	390930
Daur_HGDP	Tibetan_Shigatse	Tibetan_Nagqu	-0.000635	0.000371	-1.712	403519
Dai_HGDP	Tibetan_Shannan	Tibetan_Nagqu	-0.000723	0.000422	-1.712	401658
Tibetan_Gannan	Tibetan_Shigatse	Tibetan_Nagqu	-0.000697	0.000407	-1.711	400089
Qiang_Danba	Udmurt	Tibetan_Nagqu	-0.000883	0.000517	-1.71	422948
Tibetan_Shannan	Shor_Mountain	Tibetan_Nagqu	-0.000874	0.000512	-1.709	407215
Tibetan_Shannan	Banlashan_MN	Tibetan_Nagqu	-0.001174	0.000689	-1.703	387266
Russian_Krasnoborsky	Qiang_Danba	Tibetan_Nagqu	-0.000955	0.000564	-1.693	419096
TibetanHO_Yunnan	Russia_Alan	Tibetan_Nagqu	-0.001315	0.000777	-1.693	390183
Dai_Xishuangbanna1k	Tibetan_Chamdo	Tibetan_Nagqu	-0.000561	0.000332	-1.69	417066
Buryat_Duldurginsky	Tibetan_Chamdo	Tibetan_Nagqu	-0.000709	0.000419	-1.69	400017
Han_Chongqing	Tibetan_Shigatse	Tibetan_Nagqu	-0.000759	0.000449	-1.69	393575
Vietnamese	Tibetan_Chamdo	Tibetan_Nagqu	-0.000586	0.000348	-1.683	401015
Tibetan_Lhasa	Shirenzigou_IA	Tibetan_Nagqu	-0.00102	0.000606	-1.683	279616
Tibetan_Lhasa	Liangdao1_EN	Tibetan_Nagqu	-0.00142	0.000845	-1.68	169411
Han_SouthChina1K	Sherpa_Nepal	Tibetan_Nagqu	-0.000675	0.000402	-1.678	413812
Sherpa_Nepal	Tofalar	Tibetan_Nagqu	-0.000873	0.00052	-1.677	402184
Koryak	Tibetan_Shigatse	Tibetan_Nagqu	-0.000785	0.000469	-1.676	400266
Tibetan_Shannan	Kirghiz	Tibetan_Nagqu	-0.000797	0.000476	-1.676	403211
Sherpa_Nepal	Xibo_HGDP	Tibetan_Nagqu	-0.000789	0.000471	-1.674	393814
Visayan	Tibetan_Lhasa	Tibetan_Nagqu	-0.000781	0.000467	-1.672	395726
Sherpa_Nepal	Oroqen_HGDP	Tibetan_Nagqu	-0.000804	0.000481	-1.672	396050
Tibetan_Shigatse	Erdaojingzi_LN	Tibetan_Nagqu	-0.000929	0.000556	-1.67	334182
LaChi	Tibetan_Shigatse	Tibetan_Nagqu	-0.000727	0.000438	-1.658	398416
Vietnamese	Sherpa_Nepal	Tibetan_Nagqu	-0.000798	0.000481	-1.658	395065
Tibetan_Shigatse	Jiaozuoniecun_LBIA	Tibetan_Nagqu	-0.000966	0.000583	-1.658	360259
Koryak	Sherpa_Nepal	Tibetan_Nagqu	-0.00096	0.00058	-1.654	392109
Ede	Tibetan_Chamdo	Tibetan_Nagqu	-0.000636	0.000385	-1.653	408568
LoLo	Tibetan_Shigatse	Tibetan_Nagqu	-0.000642	0.000389	-1.652	398609
Tibetan_Shigatse	Khakass_Kachins	Tibetan_Nagqu	-0.000681	0.000413	-1.648	408927
Sherpa_Nepal	Russia_UstIda_EBA	Tibetan_Nagqu	-0.001207	0.000732	-1.648	282022
Dongxiang_Linxia	Tibetan_Shigatse	Tibetan_Nagqu	-0.000636	0.000386	-1.646	405410
Tibetan_Shigatse	Khovsgol_LBA	Tibetan_Nagqu	-0.000654	0.000397	-1.646	393555
Lahu_HGDP	Tibetan_Shigatse	Tibetan_Nagqu	-0.000664	0.000404	-1.642	399395
Qiang_Danba	Tatar_Kazan	Tibetan_Nagqu	-0.000792	0.000484	-1.637	430588
Nung	Tibetan_Chamdo	Tibetan_Nagqu	-0.000582	0.000356	-1.636	401561
KhoMu	Tibetan_Shannan	Tibetan_Nagqu	-0.00066	0.000407	-1.622	403195
Cham	Tibetan_Shannan	Tibetan_Nagqu	-0.000662	0.000408	-1.622	409119
Visayan	Tibetan_Chamdo	Tibetan_Nagqu	-0.000715	0.000441	-1.622	397421
Chuanyun_H	Nepal_Chokhopani_2700BP	Tibetan_Nagqu	-0.003488	0.00215	-1.622	118098
Tu_HGDP	Tibetan_Shannan	Tibetan_Nagqu	-0.0006	0.000371	-1.618	404584
Atayal	Tibetan_Chamdo	Tibetan_Nagqu	-0.000727	0.00045	-1.615	398142
LaChi	Tibetan_Lhasa	Tibetan_Nagqu	-0.000728	0.000451	-1.614	397021
Tibetan_Lhasa	Russia_UstIda_EBA	Tibetan_Nagqu	-0.000921	0.000573	-1.607	290186
Sherpa_Nepal	Lajia_LN	Tibetan_Nagqu	-0.001028	0.000641	-1.606	374710
Koryak	Tibetan_Chamdo	Tibetan_Nagqu	-0.000695	0.000433	-1.605	400560
Qiang_Daofu	Russia_Srubnaya_Alakul	Tibetan_Nagqu	-0.000847	0.000528	-1.605	416986
Tibetan_Shigatse	Altaian	Tibetan_Nagqu	-0.000578	0.00036	-1.604	431790
Dong_Hunan	Tibetan_Shannan	Tibetan_Nagqu	-0.000678	0.000423	-1.602	397615
Dao	Tibetan_Shannan	Tibetan_Nagqu	-0.000661	0.000414	-1.599	400907
Tibetan_Chamdo	Dolgan	Tibetan_Nagqu	-0.000696	0.000436	-1.597	401625
Tibetan_Shigatse	Khakass_Sagai	Tibetan_Nagqu	-0.000653	0.00041	-1.595	418653
Tibetan_Shigatse	Mogushan_Xianbei_IA	Tibetan_Nagqu	-0.001289	0.00081	-1.592	102997
Cong	Tibetan_Chamdo	Tibetan_Nagqu	-0.000584	0.000367	-1.588	402203
Sherpa_Nepal	Altaian	Tibetan_Nagqu	-0.000708	0.000447	-1.584	429498
Rai_Nepal	Tibetan_Chamdo	Tibetan_Nagqu	-0.000612	0.000387	-1.579	396960
Atayal	Tibetan_Shigatse	Tibetan_Nagqu	-0.000735	0.000466	-1.576	397925
LoLo	Tibetan_Chamdo	Tibetan_Nagqu	-0.000612	0.000389	-1.573	398697
Russian_Leshukonsky	Qiang_Daofu	Tibetan_Nagqu	-0.000827	0.000527	-1.571	417088
Tibetan_Chamdo	Japan_Jomon	Tibetan_Nagqu	-0.000937	0.000596	-1.571	383341
Han_Shandong	Nepal_Samdzong_1500BP	Tibetan_Nagqu	-0.000819	0.000523	-1.566	392948
Mongol_Zasagt	Tibetan_Lhasa	Tibetan_Nagqu	-0.00062	0.000396	-1.565	404884
Dusun	Tibetan_Shannan	Tibetan_Nagqu	-0.000687	0.000439	-1.565	400326
Japanese_Tokyo1K	Sherpa_Nepal	Tibetan_Nagqu	-0.00064	0.00041	-1.561	412847
Tibetan_Xunhua	Nepal_Mebrak_2125BP	Tibetan_Nagqu	-0.001576	0.00101	-1.56	260810
Khamnegan	Tibetan_Shigatse	Tibetan_Nagqu	-0.000617	0.000396	-1.558	405851
Kinh_Vietnam	Tibetan_Shigatse	Tibetan_Nagqu	-0.000598	0.000385	-1.554	403702
Sherpa_Nepal	Yukagir	Tibetan_Nagqu	-0.000749	0.000483	-1.553	417225
Dongxiang_Linxia	Tibetan_Shannan	Tibetan_Nagqu	-0.000634	0.000409	-1.551	404177
Tibetan_Lhasa	Mongolia_MBA_2_Munkhkhairkhan	Tibetan_Nagqu	-0.001149	0.000741	-1.551	303987
PhuLa	Tibetan_Chamdo	Tibetan_Nagqu	-0.000563	0.000364	-1.548	400367
Tibetan_Shigatse	Shor_Mountain	Tibetan_Nagqu	-0.000693	0.000449	-1.543	408325
TibetanHO_Yunnan	Russia_EBA_Yamnaya_Kalmykia	Tibetan_Nagqu	-0.001227	0.000795	-1.543	377263
Mang	Tibetan_Shigatse	Tibetan_Nagqu	-0.000663	0.000431	-1.539	398617
Qiang_Daofu	Russia_EBA_Yamnaya_Kalmykia	Tibetan_Nagqu	-0.000931	0.000605	-1.539	389387
Rai_Nepal	Tibetan_Lhasa	Tibetan_Nagqu	-0.000673	0.000438	-1.538	395043
Qiang_Danba	Mongolia_LBA_5_CenterWest	Tibetan_Nagqu	-0.000984	0.000641	-1.535	371982
Han_Hubei	Tibetan_Shigatse	Tibetan_Nagqu	-0.000665	0.000434	-1.534	396140
Tibetan_Shannan	Haminmangha_MN	Tibetan_Nagqu	-0.001205	0.000788	-1.528	234750
Tibetan_Shigatse	Karakalpak	Tibetan_Nagqu	-0.000603	0.000395	-1.526	434267
Kalmyk	Tibetan_Chamdo	Tibetan_Nagqu	-0.000549	0.00036	-1.525	413910
Tibetan_Chamdo	Yakut_HGDP	Tibetan_Nagqu	-0.000564	0.000371	-1.52	416304
Tibetan_Shannan	Altaian	Tibetan_Nagqu	-0.0006	0.000395	-1.519	431263
Han_SouthChina1K	Tibetan_Chamdo	Tibetan_Nagqu	-0.00047	0.00031	-1.516	415825
Tibetan_Shannan	Kazakh	Tibetan_Nagqu	-0.000605	0.000401	-1.511	432589
Dongxiang_Linxia	Tibetan_Lhasa	Tibetan_Nagqu	-0.000585	0.000387	-1.509	404107
Evenk_FarEast	Nepal_Samdzong_1500BP	Tibetan_Nagqu	-0.001197	0.000798	-1.501	374839
Japanese_Tokyo1K	Tibetan_Chamdo	Tibetan_Nagqu	-0.000478	0.00032	-1.496	415117
Han_Zhejiang	Tibetan_Chamdo	Tibetan_Nagqu	-0.000555	0.000372	-1.494	396127
Han_Jiangsu	Sherpa_Nepal	Tibetan_Nagqu	-0.000699	0.000468	-1.494	390146
Dungan	Tibetan_Chamdo	Tibetan_Nagqu	-0.000491	0.000329	-1.491	414021
Tibetan_Shannan	Boisman_MN	Tibetan_Nagqu	-0.000751	0.000504	-1.491	366524
Sherpa_Nepal	Wadian_LN	Tibetan_Nagqu	-0.001046	0.000704	-1.486	376420
Sherpa_Nepal	Xitoucun_LN	Tibetan_Nagqu	-0.001131	0.000762	-1.485	210347
Tibetan_Shannan	Erdaojingzi_LN	Tibetan_Nagqu	-0.000851	0.000573	-1.484	332633
Han_Shanghai	Sherpa_Nepal	Tibetan_Nagqu	-0.00095	0.000641	-1.482	380159
Han_Henan	Sherpa_Nepal	Tibetan_Nagqu	-0.000781	0.000527	-1.481	387581
Yugur_Sunan	Sherpa_Nepal	Tibetan_Nagqu	-0.000609	0.000412	-1.479	407264
Tibetan_Shigatse	Shimao_LN	Tibetan_Nagqu	-0.000816	0.000553	-1.477	387417
Tibetan_Lhasa	Mongolia_EIA_5	Tibetan_Nagqu	-0.001146	0.000777	-1.475	274124
Tibetan_Chamdo	Taiwan_Hanben	Tibetan_Nagqu	-0.000576	0.000392	-1.468	411442
Htin_Mal	Tibetan_Lhasa	Tibetan_Nagqu	-0.000675	0.000461	-1.466	393137
Tibetan_Shannan	Longtoushan_BA	Tibetan_Nagqu	-0.000976	0.000667	-1.465	219010
Sherpa_Nepal	Tuvinian	Tibetan_Nagqu	-0.000659	0.000451	-1.46	418729
Sherpa_Nepal	Nanai	Tibetan_Nagqu	-0.000738	0.000507	-1.455	392735
Tibetan_Chamdo	Russia_Shamanka_Eneolithic	Tibetan_Nagqu	-0.000591	0.000408	-1.449	400961
Tibetan_Chamdo	Liangdao1_EN	Tibetan_Nagqu	-0.001065	0.000737	-1.445	170572
She_HGDP	Sherpa_Nepal	Tibetan_Nagqu	-0.000675	0.000469	-1.44	393112
Tibetan_Lhasa	Nogai2	Tibetan_Nagqu	-0.000586	0.000408	-1.438	425826
Tibetan_Chamdo	Mongolia_MBA_1_Munkhkhairkhan	Tibetan_Nagqu	-0.000808	0.000562	-1.438	362321
Qiang_Daofu	Veps	Tibetan_Nagqu	-0.000733	0.000511	-1.436	425007
Sherpa_Nepal	Xiaowu_MN	Tibetan_Nagqu	-0.0013	0.000907	-1.434	370932
Russia_MLBA_Sintashta	Jinchankou_LN	Tibetan_Nagqu	-0.001729	0.001208	-1.432	294610
Tibetan_Chamdo	Russia_Shamanka_EBA	Tibetan_Nagqu	-0.000731	0.000511	-1.429	356843
Sherpa_Nepal	Zhalainuoer_EN	Tibetan_Nagqu	-0.001874	0.001318	-1.422	68215
Mongol_Minorities	Tibetan_Shannan	Tibetan_Nagqu	-0.000556	0.000391	-1.42	410708
Tibetan_Lhasa	Tatar_Siberian	Tibetan_Nagqu	-0.000565	0.0004	-1.415	430983
Tibetan_Lhasa	Luoheguxiang_LBIA	Tibetan_Nagqu	-0.00082	0.00058	-1.414	357706
Tibetan_Lhasa	Haminmangha_MN	Tibetan_Nagqu	-0.001053	0.000745	-1.414	234721
Sherpa_Nepal	Ulchi	Tibetan_Nagqu	-0.00065	0.00046	-1.413	405279
Tibetan_Shigatse	Mongolia_LBA_5_CenterWest	Tibetan_Nagqu	-0.000828	0.000586	-1.413	373809
Tibetan_Shannan	Zhalainuoer_EN	Tibetan_Nagqu	-0.001442	0.001021	-1.413	70245
Qiang_Daofu	Mongolia_EBA_2_Chemurchek	Tibetan_Nagqu	-0.000901	0.000638	-1.411	339322
Dai_HGDP	Tibetan_Chamdo	Tibetan_Nagqu	-0.000523	0.000371	-1.409	402646
Visayan	Tibetan_Shigatse	Tibetan_Nagqu	-0.000626	0.000445	-1.409	397209
Giarai	Tibetan_Lhasa	Tibetan_Nagqu	-0.000579	0.000411	-1.408	408626
Japanese_HGDP	Nepal_Samdzong_1500BP	Tibetan_Nagqu	-0.000689	0.000489	-1.408	406330
Tibetan_Shigatse	XiongNu	Tibetan_Nagqu	-0.000715	0.000509	-1.405	393523
Han_SichuanHO	Tibetan_Chamdo	Tibetan_Nagqu	-0.000525	0.000374	-1.403	398533
Mongol_Minorities	Tibetan_Chamdo	Tibetan_Nagqu	-0.000491	0.000351	-1.398	411818
CoLao	Tibetan_Shigatse	Tibetan_Nagqu	-0.000567	0.000406	-1.397	398037
Eskimo_Naukan	Tibetan_Shannan	Tibetan_Nagqu	-0.000708	0.000509	-1.391	399436
Han_Shanghai	Tibetan_Shigatse	Tibetan_Nagqu	-0.000753	0.000542	-1.39	391714
Tibetan_Chamdo	Mongolia_IA_Xianbei	Tibetan_Nagqu	-0.001004	0.000722	-1.39	304460
Tibetan_Shigatse	Mongolia_MBA_2_Munkhkhairkhan	Tibetan_Nagqu	-0.001045	0.000754	-1.385	305410
PaThen	Nepal_Samdzong_1500BP	Tibetan_Nagqu	-0.000876	0.000633	-1.384	388987
Han_Shanxi	Tibetan_Chamdo	Tibetan_Nagqu	-0.000495	0.000358	-1.383	399744
Sherpa_Nepal	Kazakh	Tibetan_Nagqu	-0.00062	0.000449	-1.383	430922
Sherpa_Nepal	Nganasan	Tibetan_Nagqu	-0.000736	0.000533	-1.381	405117
Mongol_Zasagt	Tibetan_Chamdo	Tibetan_Nagqu	-0.000546	0.000396	-1.38	406074
Tibetan_Shannan	Tofalar	Tibetan_Nagqu	-0.000611	0.000444	-1.377	406948
Qiang_Danba	XiongNu_WE	Tibetan_Nagqu	-0.000918	0.000667	-1.377	357560
Sherpa_Nepal	Tujia_HGDP	Tibetan_Nagqu	-0.000635	0.000462	-1.376	395090
Russia_EBA_Yamnaya_Kalmykia	Miaozigou_MN	Tibetan_Nagqu	-0.002414	0.001758	-1.373	101250
Tibetan_Lhasa	Mongolia_LBA_5_CenterWest	Tibetan_Nagqu	-0.000815	0.000595	-1.37	372244
Erdaojingzi_LN	Shirenzigou_IA_E	Tibetan_Nagqu	-0.004063	0.002966	-1.37	31593
Abkhasian	Lajia_LN	Tibetan_Nagqu	-0.001088	0.000797	-1.366	418844
Dong_Guizhou	Nepal_Samdzong_1500BP	Tibetan_Nagqu	-0.00073	0.000535	-1.365	398884
Qiang_Daofu	Russia_Alan	Tibetan_Nagqu	-0.000779	0.000571	-1.365	402045
Thai	Tibetan_Shigatse	Tibetan_Nagqu	-0.000496	0.000365	-1.36	417072
Mongol_Zasagt	Tibetan_Shannan	Tibetan_Nagqu	-0.000593	0.000437	-1.358	404898
PaThen	Tibetan_Shigatse	Tibetan_Nagqu	-0.000584	0.00043	-1.357	397905
Qiang_Daofu	Russia_Afanasievo	Tibetan_Nagqu	-0.000704	0.000519	-1.356	425591
Mlabri	Tibetan_Lhasa	Tibetan_Nagqu	-0.00081	0.000601	-1.349	387441
Tibetan_Shannan	Russia_UstBelaya_Angara	Tibetan_Nagqu	-0.000619	0.00046	-1.346	379838
Kankanaey	Tibetan_Shigatse	Tibetan_Nagqu	-0.000583	0.000434	-1.345	397503
Tibetan_Lhasa	Kirghiz	Tibetan_Nagqu	-0.000614	0.000457	-1.344	403276
LaChi	Tibetan_Chamdo	Tibetan_Nagqu	-0.000551	0.000411	-1.34	398342
Kusunda	Tibetan_Chamdo	Tibetan_Nagqu	-0.000552	0.000414	-1.334	409734
Tibetan_Chamdo	Oroqen_HGDP	Tibetan_Nagqu	-0.000479	0.000359	-1.332	402428
Tibetan_Lhasa	UstBelaya_EBA	Tibetan_Nagqu	-0.000703	0.000528	-1.331	384530
Tibetan_Shannan	DevilsCave_N	Tibetan_Nagqu	-0.000813	0.00061	-1.331	391780
Xibo_HGDP	Nepal_Samdzong_1500BP	Tibetan_Nagqu	-0.000736	0.000555	-1.327	391901
Tibetan_Shannan	Tubalar	Tibetan_Nagqu	-0.000573	0.000433	-1.323	427529
Sherpa_Nepal	Mongolia_BA_2	Tibetan_Nagqu	-0.001311	0.000993	-1.32	197670
Muong	Sherpa_Nepal	Tibetan_Nagqu	-0.000672	0.000509	-1.318	397119
Miaozigou_MN	Nepal_Mebrak_2125BP	Tibetan_Nagqu	-0.003114	0.002364	-1.317	69056
Tibetan_Shigatse	Mongolia_LBA_3_MongunTaiga	Tibetan_Nagqu	-0.000732	0.000557	-1.314	365197
Yumin_EN	Nepal_Chokhopani_2700BP	Tibetan_Nagqu	-0.002262	0.001721	-1.314	299174
Tibetan_Shannan	Bashkir_south	Tibetan_Nagqu	-0.000588	0.000448	-1.312	434504
Qiang_Daofu	Russia_Poltavka	Tibetan_Nagqu	-0.000736	0.000561	-1.312	401640
Tibetan_Shigatse	Tanshishan_LN	Tibetan_Nagqu	-0.000886	0.000676	-1.31	159522
Tibetan_Lhasa	Tubalar	Tibetan_Nagqu	-0.000541	0.000413	-1.309	427657
Mongolia_EIA_1_SlabGrave	Nepal_Chokhopani_2700BP	Tibetan_Nagqu	-0.001125	0.000863	-1.304	376383
Tibetan_Shigatse	Dolgan	Tibetan_Nagqu	-0.000587	0.000451	-1.301	401085
Qiang_Daofu	Russia_EarlySarmatian_SouthernUrals	Tibetan_Nagqu	-0.00075	0.000577	-1.299	306009
Tibetan_Shannan	Ekven_IA	Tibetan_Nagqu	-0.00071	0.000549	-1.294	395146
Tibetan_Lhasa	Russia_Steppe_Maikop	Tibetan_Nagqu	-0.000772	0.000597	-1.293	362562
Dong_Hunan	Tibetan_Shigatse	Tibetan_Nagqu	-0.000523	0.000405	-1.289	398814
Qiang_Danba	Bashkir_central	Tibetan_Nagqu	-0.000594	0.000461	-1.287	434369
Tibetan_Chamdo	Longtoushan_BA	Tibetan_Nagqu	-0.000771	0.000599	-1.286	220718
Tajik_Lowland	Qiang_Daofu	Tibetan_Nagqu	-0.000616	0.000479	-1.285	430624
Japanese_HGDP	Tibetan_Chamdo	Tibetan_Nagqu	-0.000416	0.000325	-1.282	409557
Yugur_Sunan	Tibetan_Chamdo	Tibetan_Nagqu	-0.000408	0.000319	-1.28	410830
Kinh_HGDP	Sherpa_Nepal	Tibetan_Nagqu	-0.000641	0.000501	-1.279	395872
Sherpa_Nepal	Mongolia_EIA_8	Tibetan_Nagqu	-0.001234	0.000965	-1.279	283208
Sila	Tibetan_Shigatse	Tibetan_Nagqu	-0.000525	0.000411	-1.277	397514
Tibetan_Shigatse	Kazakh	Tibetan_Nagqu	-0.00047	0.000368	-1.275	433103
Qiang_Danba	Mongolia_BA_2	Tibetan_Nagqu	-0.001049	0.000823	-1.274	203308
Naxi_HGDP	Nepal_Samdzong_1500BP	Tibetan_Nagqu	-0.000684	0.00054	-1.267	391113
Hmong	Tibetan_Chamdo	Tibetan_Nagqu	-0.000486	0.000384	-1.266	403550
Tibetan_Shannan	Shirenzigou_IA_E	Tibetan_Nagqu	-0.001572	0.001245	-1.263	38610
Rai_Nepal	Tibetan_Shannan	Tibetan_Nagqu	-0.000555	0.00044	-1.262	395065
Tibetan_Shigatse	Russia_OldBeringSea_Ekven	Tibetan_Nagqu	-0.000594	0.00047	-1.262	396584
Qiang_Daofu	Russia_MLBA_Sintashta	Tibetan_Nagqu	-0.000665	0.000528	-1.259	424142
Tibetan_Shigatse	Zhalainuoer_IA	Tibetan_Nagqu	-0.00198	0.001573	-1.259	21390
Eskimo_Naukan	Tibetan_Lhasa	Tibetan_Nagqu	-0.000621	0.000495	-1.254	399624
Hmong	Tibetan_Shigatse	Tibetan_Nagqu	-0.000507	0.000404	-1.253	403617
Tibetan_Chamdo	Zhalainuoer_EN	Tibetan_Nagqu	-0.00114	0.00091	-1.253	70748
Qiang_Danba	Tamang_Nepal	Tibetan_Nagqu	-0.000493	0.000393	-1.252	402817
Tibetan_Chamdo	Salar_Xunhua	Tibetan_Nagqu	-0.000447	0.000358	-1.251	409609
Ket	Tibetan_Lhasa	Tibetan_Nagqu	-0.000547	0.000438	-1.251	415583
PhuLa	Sherpa_Nepal	Tibetan_Nagqu	-0.0006	0.00048	-1.251	394514
Tibetan_Shannan	Yumin_EN	Tibetan_Nagqu	-0.000983	0.000785	-1.251	319107
Han_Zhejiang	Sherpa_Nepal	Tibetan_Nagqu	-0.000632	0.000507	-1.247	386993
Ulchi	Nepal_Samdzong_1500BP	Tibetan_Nagqu	-0.000673	0.00054	-1.247	404975
Sherpa_Nepal	XiongNu_WE	Tibetan_Nagqu	-0.001031	0.000827	-1.247	348331
Lahu_HGDP	Tibetan_Chamdo	Tibetan_Nagqu	-0.00047	0.000377	-1.246	399550
Gurung_Nepal	Tibetan_Lhasa	Tibetan_Nagqu	-0.000514	0.000413	-1.245	396951
Qiang_Daofu	Mongolia_MBA_2_Munkhkhairkhan	Tibetan_Nagqu	-0.000927	0.000745	-1.244	306165
Abkhasian	Jinchankou_LN	Tibetan_Nagqu	-0.0015	0.001206	-1.244	300755
Eskimo_Naukan	Sherpa_Nepal	Tibetan_Nagqu	-0.00074	0.000598	-1.239	392996
Ket	Tibetan_Shannan	Tibetan_Nagqu	-0.000563	0.000455	-1.236	415455
Hezhen_HGDP	Nepal_Samdzong_1500BP	Tibetan_Nagqu	-0.000699	0.000567	-1.233	391810
Tibetan_Chamdo	UstBelaya_EBA	Tibetan_Nagqu	-0.000608	0.000494	-1.231	387136
Tibetan_Chamdo	Tibetan_Xinlong	Tibetan_Nagqu	-0.000394	0.00032	-1.23	401765
Mongol_Sainnoyon	Sherpa_Nepal	Tibetan_Nagqu	-0.000577	0.00047	-1.229	401873
Tlingit	Tibetan_Lhasa	Tibetan_Nagqu	-0.000622	0.000508	-1.225	407865
Kurd	Lajia_LN	Tibetan_Nagqu	-0.00098	0.0008	-1.225	414877
Tibetan_Chamdo	Nanai	Tibetan_Nagqu	-0.000452	0.00037	-1.221	399714
Kalmyk	Sherpa_Nepal	Tibetan_Nagqu	-0.000569	0.000466	-1.22	409209
Tharu_Nepal	Tibetan_Lhasa	Tibetan_Nagqu	-0.000546	0.000447	-1.219	405846
Tibetan_Lhasa	Xiaojingshan_EN	Tibetan_Nagqu	-0.000757	0.000621	-1.219	217908
Tibetan_Lhasa	Khakass_Kachins	Tibetan_Nagqu	-0.000522	0.000429	-1.217	408125
Tibetan_Lhasa	Russia_OldBeringSea_Ekven	Tibetan_Nagqu	-0.000581	0.000478	-1.215	395190
Mongol_Sainnoyon	Tibetan_Chamdo	Tibetan_Nagqu	-0.000443	0.000365	-1.213	407663
Mongolia_Chalcolithic_2_Afanasievo	Nepal_Mebrak_2125BP	Tibetan_Nagqu	-0.002311	0.001905	-1.213	186063
Russian_HGDP	Qiang_Daofu	Tibetan_Nagqu	-0.000596	0.000492	-1.212	439336
Mongolia_IA_Xianbei	Nepal_Chokhopani_2700BP	Tibetan_Nagqu	-0.002142	0.001767	-1.212	283472
Jinchankou_LN	Shirenzigou_IA_E	Tibetan_Nagqu	-0.004626	0.003822	-1.21	26006
Mang	Tibetan_Lhasa	Tibetan_Nagqu	-0.000527	0.000436	-1.209	397422
Qiang_Danba	Russia_Bolshoy	Tibetan_Nagqu	-0.00066	0.000548	-1.205	364330
Tibetan_Shannan	Jinchankou_LN	Tibetan_Nagqu	-0.000959	0.000798	-1.203	276126
Tibetan_Shannan	Russia_Bolshoy	Tibetan_Nagqu	-0.000661	0.000551	-1.2	364459
TibetanHO_Yunnan	Russia_Steppe_Maikop	Tibetan_Nagqu	-0.000947	0.00079	-1.199	353914
Russia_Srubnaya	Jinchankou_LN	Tibetan_Nagqu	-0.001534	0.001281	-1.198	285035
Tibetan_Shannan	Karakalpak	Tibetan_Nagqu	-0.000502	0.000419	-1.197	433707
Tibetan_Shigatse	Mongolia_LBA_2_Ulaanzukh	Tibetan_Nagqu	-0.000602	0.000503	-1.196	349796
Ukrainian	Jinchankou_LN	Tibetan_Nagqu	-0.001393	0.001164	-1.196	311066
Mongolia_N_East	Nepal_Samdzong_1500BP	Tibetan_Nagqu	-0.001079	0.000903	-1.195	332645
Tibetan_Shannan	Mongolia_IA_Xianbei	Tibetan_Nagqu	-0.000849	0.000711	-1.193	302205
Qiang_Daofu	Tatar_Mishar	Tibetan_Nagqu	-0.000556	0.000468	-1.188	428511
TibetanHO_Yunnan	Mongolia_BA_2	Tibetan_Nagqu	-0.001257	0.001058	-1.188	196891
Tlingit	Sherpa_Nepal	Tibetan_Nagqu	-0.000757	0.000637	-1.187	401930
Adygei	Qiang_Daofu	Tibetan_Nagqu	-0.000586	0.000494	-1.186	444034
Tibetan_Shannan	Liangdao1_EN	Tibetan_Nagqu	-0.000961	0.00081	-1.186	169290
Tibetan_Chamdo	Ulchi	Tibetan_Nagqu	-0.000399	0.000336	-1.184	409490
Chukchi	Tibetan_Shigatse	Tibetan_Nagqu	-0.000496	0.000419	-1.184	408423
Sherpa_Nepal	Mongolia_LBA_4_CenterWest	Tibetan_Nagqu	-0.000609	0.000517	-1.18	387265
Russian_Pinezhsky	Jinchankou_LN	Tibetan_Nagqu	-0.001418	0.001202	-1.18	289742
Tibetan_Chamdo	Russia_UstIda_LN	Tibetan_Nagqu	-0.00064	0.000543	-1.179	360097
Haojiatai_LBIA	Nepal_Samdzong_1500BP	Tibetan_Nagqu	-0.001318	0.001119	-1.178	293177
Tagalog	Sherpa_Nepal	Tibetan_Nagqu	-0.000641	0.000545	-1.176	391385
Tibetan_Lhasa	Mongolia_EBA_2_Chemurchek	Tibetan_Nagqu	-0.000761	0.000647	-1.176	337018
Han_Chongqing	Sherpa_Nepal	Tibetan_Nagqu	-0.0007	0.000596	-1.175	383106
Sherpa_Nepal	Mongolia_EBA_2_Chemurchek	Tibetan_Nagqu	-0.001034	0.00088	-1.175	328782
Qiang_Danba	Mongolia_EIA_4_Sagly	Tibetan_Nagqu	-0.000534	0.000456	-1.17	409762
Kubachinian	Miaozigou_MN	Tibetan_Nagqu	-0.00158	0.001352	-1.168	111268
Tajik	Qiang_Daofu	Tibetan_Nagqu	-0.000584	0.0005	-1.167	426941
Tibetan_Shannan	Mongolia_LBA_5_CenterWest	Tibetan_Nagqu	-0.000729	0.000625	-1.167	372119
Dongxiang_Linxia	Tibetan_Chamdo	Tibetan_Nagqu	-0.00043	0.000369	-1.163	405658
Dai_HGDP	Tibetan_Shigatse	Tibetan_Nagqu	-0.00047	0.000404	-1.163	402733
Gelao_Longlin	Sherpa_Nepal	Tibetan_Nagqu	-0.00056	0.000482	-1.161	395421
Qiang_Daofu	Russia_North_Caucasus	Tibetan_Nagqu	-0.000689	0.000594	-1.161	318338
Tibetan_Chamdo	Mongolia_EIA_6_Pazyryk	Tibetan_Nagqu	-0.000816	0.000703	-1.161	296037
Tibetan_Lhasa	Mongolia_EIA_8	Tibetan_Nagqu	-0.000862	0.000743	-1.16	291842
Dao	Tibetan_Chamdo	Tibetan_Nagqu	-0.000424	0.000366	-1.157	401763
Buryat_Ehirit	Sherpa_Nepal	Tibetan_Nagqu	-0.000587	0.000508	-1.157	397113
Bianbian_EN	Nepal_Samdzong_1500BP	Tibetan_Nagqu	-0.001397	0.00121	-1.155	250640
Dong_Hunan	Tibetan_Chamdo	Tibetan_Nagqu	-0.000432	0.000376	-1.149	398874
Qiang_Daofu	Russia_Caucasus_EBA_Yamnaya	Tibetan_Nagqu	-0.000704	0.000613	-1.148	296523
TibetanHO_Yunnan	Mongolia_LBA_5_CenterWest	Tibetan_Nagqu	-0.000939	0.000818	-1.148	361726
TibetanHO_Yunnan	Nepal_Samdzong_1500BP	Tibetan_Nagqu	-0.000751	0.000655	-1.147	379225
Han_Chongqing	Tibetan_Lhasa	Tibetan_Nagqu	-0.000554	0.000484	-1.145	391838
Tibetan_Chamdo	Tujia_HGDP	Tibetan_Nagqu	-0.000397	0.000348	-1.141	401267
Tibetan_Chamdo	Haojiatai_LBIA	Tibetan_Nagqu	-0.000821	0.000719	-1.141	310221
Tibetan_Shannan	Shimao_LN	Tibetan_Nagqu	-0.00067	0.000588	-1.14	385647
Tibetan_Chamdo	Russia_Lokomotiv_Eneolithic	Tibetan_Nagqu	-0.000588	0.000517	-1.139	345879
Chukchi	Sherpa_Nepal	Tibetan_Nagqu	-0.000603	0.000529	-1.139	402862
Tibetan_Gannan	Tibetan_Lhasa	Tibetan_Nagqu	-0.000493	0.000433	-1.137	398664
TibetanHO_Yunnan	Russia_Srubnaya	Tibetan_Nagqu	-0.000821	0.000722	-1.137	405234
Lak	Jinchankou_LN	Tibetan_Nagqu	-0.001355	0.001192	-1.137	299040
Han_Guangdong	Tibetan_Chamdo	Tibetan_Nagqu	-0.000438	0.000389	-1.124	399700
Circassian	Jinchankou_LN	Tibetan_Nagqu	-0.001292	0.001149	-1.124	299319
Kabardinian	Jinchankou_LN	Tibetan_Nagqu	-0.00128	0.001142	-1.12	297907
Ilocano	Sherpa_Nepal	Tibetan_Nagqu	-0.000787	0.000704	-1.118	380384
Kinh_HoChiMinh1K	Sherpa_Nepal	Tibetan_Nagqu	-0.000477	0.000427	-1.116	420434
Tibetan_Shannan	Even	Tibetan_Nagqu	-0.000488	0.000437	-1.116	415617
Tibetan_Lhasa	Mongolia_Mongol	Tibetan_Nagqu	-0.000678	0.000608	-1.116	324304
Sherpa_Nepal	Tatar_Zabolotniye	Tibetan_Nagqu	-0.000692	0.00062	-1.116	402446
Tibetan_Lhasa	Tatar_Zabolotniye	Tibetan_Nagqu	-0.000556	0.000499	-1.115	407901
Mongolia_LBA_1_MongunTaiga	Nepal_Chokhopani_2700BP	Tibetan_Nagqu	-0.002224	0.001995	-1.115	175336
Sherpa_Nepal	Mongolia_N_North	Tibetan_Nagqu	-0.000654	0.000587	-1.113	369111
Oroqen_HGDP	Nepal_Samdzong_1500BP	Tibetan_Nagqu	-0.000628	0.000565	-1.112	394459
Tibetan_Lhasa	Zhalainuoer_EN	Tibetan_Nagqu	-0.001094	0.000987	-1.109	70271
Adygei	Jinchankou_LN	Tibetan_Nagqu	-0.001219	0.0011	-1.108	313190
Tibetan_Shannan	UstBelaya_EBA	Tibetan_Nagqu	-0.000582	0.000526	-1.106	384478
Mlabri	Tibetan_Chamdo	Tibetan_Nagqu	-0.000604	0.000548	-1.102	389291
Buryat_Zakamensky	Tibetan_Shigatse	Tibetan_Nagqu	-0.00045	0.000409	-1.1	404419
Tibetan_Yajiang	Shirenzigou_IA_E	Tibetan_Nagqu	-0.001361	0.001239	-1.099	38805
Lahu_HGDP	Tibetan_Shannan	Tibetan_Nagqu	-0.000477	0.000435	-1.098	398232
Russia_Srubnaya_Alakul	Jinchankou_LN	Tibetan_Nagqu	-0.001419	0.001292	-1.098	286159
Qiang_Daofu	Russia_Karasuk	Tibetan_Nagqu	-0.000558	0.000509	-1.097	410470
Sherpa_Nepal	Khakass_Kachins	Tibetan_Nagqu	-0.00056	0.000511	-1.097	402862
Qiang_Daofu	Russia_Late_Sarmatian	Tibetan_Nagqu	-0.000623	0.000569	-1.095	385941
TibetanHO_Yunnan	Nepal_Mebrak_2125BP	Tibetan_Nagqu	-0.001088	0.000994	-1.095	258572
She_HGDP	Tibetan_Chamdo	Tibetan_Nagqu	-0.000391	0.000357	-1.094	399933
Qiang_Daofu	Russia_MLBA_Krasnoyarsk	Tibetan_Nagqu	-0.000566	0.000519	-1.091	407317
Kabardinian	Lajia_LN	Tibetan_Nagqu	-0.000812	0.000746	-1.089	414623
Murut	Sherpa_Nepal	Tibetan_Nagqu	-0.000599	0.000551	-1.087	392930
Tibetan_Chamdo	Mongolia_EIA_5	Tibetan_Nagqu	-0.000795	0.000732	-1.087	275989
Li_Hainan	Sherpa_Nepal	Tibetan_Nagqu	-0.000649	0.0006	-1.083	388571
Tibetan_Lhasa	Haojiatai_LBIA	Tibetan_Nagqu	-0.000814	0.000752	-1.082	307829
Tibetan_Shigatse	Wadian_LN	Tibetan_Nagqu	-0.00059	0.000546	-1.081	389100
Nivkh	Sherpa_Nepal	Tibetan_Nagqu	-0.000597	0.000552	-1.081	390571
Sherpa_Nepal	Mongolia_MBA_2_Munkhkhairkhan	Tibetan_Nagqu	-0.001084	0.001003	-1.081	295473
Naxi_HGDP	Sherpa_Nepal	Tibetan_Nagqu	-0.000482	0.000446	-1.08	392582
Tibetan_Lhasa	Japan_Jomon	Tibetan_Nagqu	-0.0007	0.000651	-1.075	380960
Ukrainian	Qiang_Daofu	Tibetan_Nagqu	-0.000546	0.00051	-1.072	442145
Han_Fujian	Tibetan_Chamdo	Tibetan_Nagqu	-0.000415	0.000388	-1.071	396461
Russia_Steppe_Maikop	Jinchankou_LN	Tibetan_Nagqu	-0.001586	0.001485	-1.068	248528
Ossetian	Qiang_Daofu	Tibetan_Nagqu	-0.000528	0.000495	-1.067	437016
Htin_Mal	Tibetan_Chamdo	Tibetan_Nagqu	-0.000473	0.000445	-1.063	394443
Mogolian_HGDP	Sherpa_Nepal	Tibetan_Nagqu	-0.00052	0.000489	-1.062	392478
Sherpa_Nepal	Shor_Khakassia	Tibetan_Nagqu	-0.000645	0.000609	-1.059	396515
Sherpa_Nepal	Chuanyun_H	Tibetan_Nagqu	-0.001168	0.001104	-1.058	122173
Russian	Jinchankou_LN	Tibetan_Nagqu	-0.001184	0.001123	-1.054	317961
Malay	Tibetan_Shigatse	Tibetan_Nagqu	-0.000415	0.000394	-1.053	407998
Adygei	TibetanHO_Yunnan	Tibetan_Nagqu	-0.00068	0.000645	-1.053	440597
Buryat_Bohansky	Tibetan_Chamdo	Tibetan_Nagqu	-0.000423	0.000403	-1.051	400165
Tibetan_Shannan	Kazakh_Aksay	Tibetan_Nagqu	-0.000434	0.000413	-1.05	412075
Kankanaey	Tibetan_Chamdo	Tibetan_Nagqu	-0.000459	0.000437	-1.05	397536
Tibetan_Shigatse	Khakass_Koibals	Tibetan_Nagqu	-0.00046	0.000438	-1.05	404701
Sherpa_Nepal	Mogushan_Xianbei_IA	Tibetan_Nagqu	-0.001135	0.001082	-1.049	99416
Rai_Nepal	Tibetan_Shigatse	Tibetan_Nagqu	-0.000441	0.00042	-1.048	396596
Tibetan_Lhasa	Shimao_LN	Tibetan_Nagqu	-0.000594	0.000567	-1.048	385684
Qiang_Daofu	Mordovian	Tibetan_Nagqu	-0.000515	0.000492	-1.047	443930
Tibetan_Shigatse	Boisman_MN	Tibetan_Nagqu	-0.000483	0.000463	-1.044	368066
Qiang_Daofu	Karelian	Tibetan_Nagqu	-0.000521	0.0005	-1.041	432784
Mordovian	Jinchankou_LN	Tibetan_Nagqu	-0.001134	0.001094	-1.036	313192
Tlingit	Tibetan_Shannan	Tibetan_Nagqu	-0.000545	0.000527	-1.035	407866
Qiang_Danba	Bashkir_south	Tibetan_Nagqu	-0.000451	0.000437	-1.031	435217
Adygei	Lajia_LN	Tibetan_Nagqu	-0.000741	0.000721	-1.028	435097
Tibetan_Chamdo	Wuqi_EN	Tibetan_Nagqu	-0.000913	0.000888	-1.028	76176
Tlingit	Tibetan_Shigatse	Tibetan_Nagqu	-0.00051	0.000498	-1.026	409130
TibetanHO_Yunnan	Veps	Tibetan_Nagqu	-0.00071	0.000696	-1.021	419134
Tibetan_Shigatse	Xiaowu_MN	Tibetan_Nagqu	-0.000729	0.000713	-1.021	384017
Newar_Nepal	Tibetan_Lhasa	Tibetan_Nagqu	-0.000419	0.000411	-1.019	411470
Tibetan_Lhasa	Russia_EarlySarmatian_SouthernUrals	Tibetan_Nagqu	-0.000617	0.000607	-1.017	303973
Atayal	Sherpa_Nepal	Tibetan_Nagqu	-0.000617	0.000607	-1.017	389567
Tibetan_Shigatse	Russia_UstIda_EBA	Tibetan_Nagqu	-0.000559	0.000552	-1.012	291660
Tibetan_Shigatse	Haojiatai_LN	Tibetan_Nagqu	-0.000589	0.000583	-1.01	291453
Tamang_Nepal	Tibetan_Lhasa	Tibetan_Nagqu	-0.000396	0.000393	-1.007	402950
Tibetan_Chamdo	Xitoucun_LN	Tibetan_Nagqu	-0.00056	0.000558	-1.004	217790
Tibetan_Shannan	XiongNu_WE	Tibetan_Nagqu	-0.000654	0.000653	-1.001	357943
Veps	Lajia_LN	Tibetan_Nagqu	-0.000753	0.000753	-1	412723
Tibetan_Lhasa	Russia_Bolshoy	Tibetan_Nagqu	-0.000536	0.000537	-0.998	364508
Tibetan_Chamdo	Mongolia_Chalcolithic_1_Afanasievo	Tibetan_Nagqu	-0.000698	0.000702	-0.995	299167
Qiang_Daofu	Nepal_Chokhopani_2700BP	Tibetan_Nagqu	-0.000723	0.00073	-0.991	390880
Tibetan_Shannan	Wuqi_EN	Tibetan_Nagqu	-0.000957	0.000966	-0.991	75565
Tibetan_Chamdo	Qihe_EN	Tibetan_Nagqu	-0.000758	0.000765	-0.99	131486
Ket	Sherpa_Nepal	Tibetan_Nagqu	-0.00056	0.000571	-0.982	411967
Buryat_Bohansky	Tibetan_Lhasa	Tibetan_Nagqu	-0.000426	0.000435	-0.979	398544
Korean	Sherpa_Nepal	Tibetan_Nagqu	-0.00049	0.000501	-0.978	388515
Tibetan_Lhasa	Russia_UstIda_LN	Tibetan_Nagqu	-0.000578	0.000592	-0.977	357579
Evenk_FarEast	Nepal_Chokhopani_2700BP	Tibetan_Nagqu	-0.001169	0.001197	-0.977	369822
Tibetan_Shigatse	Russia_UstIda_LN	Tibetan_Nagqu	-0.000569	0.000583	-0.976	359161
KhoMu	Sherpa_Nepal	Tibetan_Nagqu	-0.000492	0.000506	-0.973	398207
Cong	Sherpa_Nepal	Tibetan_Nagqu	-0.000472	0.000487	-0.97	396044
Tajik_Mountain	Jinchankou_LN	Tibetan_Nagqu	-0.001041	0.001075	-0.969	302087
Tibetan_Shigatse	Russia_UstBelaya_Angara	Tibetan_Nagqu	-0.000435	0.000449	-0.968	381290
Qiang_Danba	Uzbek_Khorezm	Tibetan_Nagqu	-0.000455	0.000471	-0.968	415914
Tlingit	Qiang_Danba	Tibetan_Nagqu	-0.000524	0.000541	-0.968	408112
Qiang_Daofu	Russia_EBA_Yamnaya_Samara	Tibetan_Nagqu	-0.000546	0.000564	-0.968	403700
Dong_Hunan	Sherpa_Nepal	Tibetan_Nagqu	-0.000478	0.000496	-0.964	391207
Russia_EBA_Yamnaya_Samara	Jinchankou_LN	Tibetan_Nagqu	-0.001239	0.001286	-0.963	276032
TibetanHO_Yunnan	Nepal_Chokhopani_2700BP	Tibetan_Nagqu	-0.000959	0.000999	-0.961	374901
Tibetan_Shigatse	Mongolia_EIA_8	Tibetan_Nagqu	-0.000722	0.000752	-0.96	293299
Buryat_Ehirit	Nepal_Mebrak_2125BP	Tibetan_Nagqu	-0.000882	0.00092	-0.959	269916
Cham	Tibetan_Shigatse	Tibetan_Nagqu	-0.000374	0.00039	-0.958	409889
Han_Fujian	Tibetan_Shigatse	Tibetan_Nagqu	-0.000391	0.000409	-0.957	396273
Han_Shandong	Sherpa_Nepal	Tibetan_Nagqu	-0.000428	0.000449	-0.954	394211
Miaozigou_MN	Mongolia_EBA_2_Chemurchek	Tibetan_Nagqu	-0.001898	0.001989	-0.954	89387
Tibetan_Shigatse	Haminmangha_MN	Tibetan_Nagqu	-0.000705	0.000741	-0.95	235865
Tibetan_Shannan	Liangdao2_EN	Tibetan_Nagqu	-0.000728	0.000767	-0.95	327315
Tibetan_Lhasa	Mongolia_EIA_4_Sagly	Tibetan_Nagqu	-0.000437	0.000462	-0.946	409464
Baoan_Jishishan	Tibetan_Chamdo	Tibetan_Nagqu	-0.000323	0.000344	-0.939	407440
Buryat_Bohansky	Tibetan_Shigatse	Tibetan_Nagqu	-0.000413	0.00044	-0.939	399550
Tibetan_Chamdo	Nepal_Mebrak_2125BP	Tibetan_Nagqu	-0.000672	0.000716	-0.938	269540
Buryat_Zakamensky	Tibetan_Chamdo	Tibetan_Nagqu	-0.000371	0.000396	-0.937	404577
Cambodian	Tibetan_Shannan	Tibetan_Nagqu	-0.000403	0.00043	-0.937	406331
Qiang_Daofu	Russia_Srubnaya	Tibetan_Nagqu	-0.000503	0.000537	-0.937	414136
Tibetan_Lhasa	Bashkir_central	Tibetan_Nagqu	-0.000421	0.000451	-0.935	433734
Kurd	Qiang_Daofu	Tibetan_Nagqu	-0.000493	0.00053	-0.931	427267
Chuanyun_H	Nepal_Mebrak_2125BP	Tibetan_Nagqu	-0.002143	0.002303	-0.931	83330
Zhalainuoer_EN	Nepal_Mebrak_2125BP	Tibetan_Nagqu	-0.002679	0.002879	-0.931	46234
Tibetan_Shigatse	Kazakh_Aksay	Tibetan_Nagqu	-0.000371	0.000399	-0.929	413182
Tujia_HGDP	Nepal_Samdzong_1500BP	Tibetan_Nagqu	-0.000499	0.000538	-0.928	393763
Sherpa_Nepal	XiongNu	Tibetan_Nagqu	-0.000562	0.000606	-0.928	381335
Mongolia_Chalcolithic_2_Afanasievo	Nepal_Samdzong_1500BP	Tibetan_Nagqu	-0.001098	0.001183	-0.928	267483
Tibetan_Shigatse	Mongolia_MBA_1_Munkhkhairkhan	Tibetan_Nagqu	-0.000531	0.000574	-0.925	361442
Zhalainuoer_EN	Nepal_Chokhopani_2700BP	Tibetan_Nagqu	-0.002407	0.002606	-0.924	65842
Qiang_Daofu	Chuvash	Tibetan_Nagqu	-0.000431	0.000467	-0.923	432982
Sherpa_Nepal	Negidal	Tibetan_Nagqu	-0.000563	0.000612	-0.92	382230
Mongol_Zasagt	Tibetan_Shigatse	Tibetan_Nagqu	-0.000372	0.000405	-0.918	406037
Lak	Qiang_Daofu	Tibetan_Nagqu	-0.000486	0.00053	-0.917	427954
Han_Beijing1K	Tibetan_Chamdo	Tibetan_Nagqu	-0.000281	0.000307	-0.915	418063
Longtoushan_BA	Nepal_Samdzong_1500BP	Tibetan_Nagqu	-0.000943	0.001034	-0.912	208973
TibetanHO_Yunnan	Tatar_Mishar	Tibetan_Nagqu	-0.000589	0.000648	-0.909	423308
Han_Fujian	Sherpa_Nepal	Tibetan_Nagqu	-0.000484	0.000534	-0.907	387775
Kurd	Jinchankou_LN	Tibetan_Nagqu	-0.001102	0.001216	-0.906	298044
Htin_Mal	Tibetan_Shigatse	Tibetan_Nagqu	-0.000418	0.000464	-0.901	394283
Maonan_Huanjiang	Sherpa_Nepal	Tibetan_Nagqu	-0.000422	0.000469	-0.899	401341
Japanese_HGDP	Sherpa_Nepal	Tibetan_Nagqu	-0.000383	0.000426	-0.898	406252
Daur_HGDP	Nepal_Samdzong_1500BP	Tibetan_Nagqu	-0.000517	0.000575	-0.898	395881
Tibetan_Lhasa	Russia_IA	Tibetan_Nagqu	-0.000448	0.000503	-0.891	397543
Sherpa_Nepal	Russia_Bolshoy	Tibetan_Nagqu	-0.0006	0.000673	-0.891	356579
Russian	Qiang_Daofu	Tibetan_Nagqu	-0.000443	0.000499	-0.888	449963
Dacaozi_IA	Nepal_Samdzong_1500BP	Tibetan_Nagqu	-0.000722	0.000813	-0.887	360404
Tibetan_Shannan	Altaian_Chelkans	Tibetan_Nagqu	-0.000435	0.000491	-0.886	408703
Qiang_Daofu	Mongolia_LBA_5_CenterWest	Tibetan_Nagqu	-0.000541	0.000611	-0.885	374819
Sherpa_Nepal	Russia_Lokomotiv_Eneolithic	Tibetan_Nagqu	-0.000609	0.000689	-0.883	333836
Tibetan_Lhasa	China_Tianyuan	Tibetan_Nagqu	-0.000689	0.000781	-0.882	335956
Tibetan_Chamdo	Mongolia_LBA_2_Ulaanzukh	Tibetan_Nagqu	-0.000415	0.000471	-0.881	350537
Tibetan_Chamdo	Dacaozi_IA	Tibetan_Nagqu	-0.000408	0.000465	-0.877	379499
Tibetan_Chamdo	XiongNu	Tibetan_Nagqu	-0.000446	0.000509	-0.876	394382
Mongolia_Chalcolithic_2_Afanasievo	Nepal_Chokhopani_2700BP	Tibetan_Nagqu	-0.001568	0.001793	-0.874	262991
Cambodian	Sherpa_Nepal	Tibetan_Nagqu	-0.000447	0.000513	-0.871	401220
Tibetan_Xinlong	Nepal_Chokhopani_2700BP	Tibetan_Nagqu	-0.000656	0.000753	-0.871	391397
LoLo	Sherpa_Nepal	Tibetan_Nagqu	-0.000457	0.000527	-0.867	391825
Ede	Tibetan_Shannan	Tibetan_Nagqu	-0.000373	0.000432	-0.865	407754
Tibetan_Lhasa	Altaian_Chelkans	Tibetan_Nagqu	-0.000417	0.000482	-0.865	408678
Yugur_Sunan	Nepal_Samdzong_1500BP	Tibetan_Nagqu	-0.000412	0.000478	-0.862	407017
Sherpa_Nepal	Dolgan	Tibetan_Nagqu	-0.000518	0.000601	-0.862	392539
Qiang_Danba	Mongolia_MBA_2_Munkhkhairkhan	Tibetan_Nagqu	-0.000652	0.000756	-0.862	303608
Tibetan_Lhasa	Mongolia_MBA_1_Munkhkhairkhan	Tibetan_Nagqu	-0.000503	0.000583	-0.861	359806
Tibetan_Shannan	Xiaogao_EN	Tibetan_Nagqu	-0.000653	0.000759	-0.859	335145
Mongolia_EIA_8	Nepal_Samdzong_1500BP	Tibetan_Nagqu	-0.00101	0.001176	-0.859	278184
Sherpa_Nepal	Shirenzigou_IA_E	Tibetan_Nagqu	-0.001321	0.001536	-0.859	37543
Tibetan_Lhasa	Russia_BA_Okunevo	Tibetan_Nagqu	-0.000414	0.000484	-0.857	409012
Tibetan_Yajiang	Yumin_EN	Tibetan_Nagqu	-0.000649	0.000757	-0.857	319780
Tibetan_Chamdo	Mongolia_BA_1	Tibetan_Nagqu	-0.000608	0.000711	-0.856	309089
Tajik_Lowland	TibetanHO_Yunnan	Tibetan_Nagqu	-0.000546	0.000641	-0.853	426054
Cambodian	Tibetan_Shigatse	Tibetan_Nagqu	-0.000346	0.000407	-0.85	407575
Russian_Leshukonsky	Tibetan_Lhasa	Tibetan_Nagqu	-0.000457	0.000539	-0.849	414969
Tibetan_Shigatse	Japan_Jomon	Tibetan_Nagqu	-0.00054	0.000636	-0.849	382504
Russia_Afanasievo	Jinchankou_LN	Tibetan_Nagqu	-0.001056	0.001244	-0.849	295867
Tibetan_Chamdo	Mongolia_Chalcolithic_2_Afanasievo	Tibetan_Nagqu	-0.000587	0.000693	-0.847	282346
Han_Chongqing	Tibetan_Chamdo	Tibetan_Nagqu	-0.000362	0.000429	-0.844	394070
Tibetan_Shannan	Zhalainuoer_IA	Tibetan_Nagqu	-0.00127	0.001504	-0.844	21309
Daur_HGDP	Sherpa_Nepal	Tibetan_Nagqu	-0.000405	0.000481	-0.843	397336
Tibetan_Shannan	Wuzhuangguoliang	Tibetan_Nagqu	-0.000692	0.000821	-0.843	55565
Qiang_Danba	Shirenzigou_IA_E	Tibetan_Nagqu	-0.001002	0.001188	-0.843	38632
Tibetan_Lhasa	Uzbek_Tashkent	Tibetan_Nagqu	-0.000373	0.000443	-0.842	422988
Mongolia_EBA_1_Ulgii	Nepal_Chokhopani_2700BP	Tibetan_Nagqu	-0.000972	0.001162	-0.837	341916
Kumyk	Miaozigou_MN	Tibetan_Nagqu	-0.001038	0.00124	-0.837	114452
Tibetan_Lhasa	Xiaogao_EN	Tibetan_Nagqu	-0.000615	0.000736	-0.835	335277
Qiang_Danba	Nogai	Tibetan_Nagqu	-0.000402	0.000484	-0.831	427299
Eskimo_ChaplinSireniki	Nepal_Chokhopani_2700BP	Tibetan_Nagqu	-0.00083	0.001002	-0.829	385458
Tajik_Lowland	Tibetan_Lhasa	Tibetan_Nagqu	-0.000408	0.000497	-0.822	428964
Qiang_Daofu	Russia_Sintashta_MLBA	Tibetan_Nagqu	-0.000512	0.000625	-0.82	360983
CoLao	Sherpa_Nepal	Tibetan_Nagqu	-0.000422	0.000516	-0.817	391047
Sherpa_Nepal	Russia_Shamanka_Eneolithic	Tibetan_Nagqu	-0.000467	0.000573	-0.814	390653
Nivkh	Tibetan_Chamdo	Tibetan_Nagqu	-0.000329	0.000405	-0.813	398215
Kabardinian	TibetanHO_Yunnan	Tibetan_Nagqu	-0.000559	0.000688	-0.813	420971
Lak	TibetanHO_Yunnan	Tibetan_Nagqu	-0.000567	0.000697	-0.813	422585
Baoan_Jishishan	Nepal_Samdzong_1500BP	Tibetan_Nagqu	-0.000425	0.000524	-0.81	401084
Han_Jiangsu	Nepal_Samdzong_1500BP	Tibetan_Nagqu	-0.000475	0.000588	-0.806	387740
Qiang_Danba	Nepal_Mebrak_2125BP	Tibetan_Nagqu	-0.000652	0.00081	-0.806	267087
Qiang_Danba	Mongolia_Chalcolithic_1_Afanasievo	Tibetan_Nagqu	-0.000616	0.000766	-0.804	296949
Hmong	Sherpa_Nepal	Tibetan_Nagqu	-0.000395	0.000493	-0.801	397798
Kurd	TibetanHO_Yunnan	Tibetan_Nagqu	-0.000556	0.000699	-0.796	421355
Tajik_Lowland	Jinchankou_LN	Tibetan_Nagqu	-0.000849	0.001068	-0.795	302124
Tibetan_Shannan	Boshan_EN	Tibetan_Nagqu	-0.000583	0.000737	-0.791	355041
Tibetan_Shigatse	Uzbek_Tashkent	Tibetan_Nagqu	-0.000353	0.000447	-0.79	423776
Ukrainian	Miaozigou_MN	Tibetan_Nagqu	-0.000986	0.001249	-0.789	118833
Tibetan_Shigatse	Mansi	Tibetan_Nagqu	-0.000363	0.000462	-0.786	416231
Ossetian	Jinchankou_LN	Tibetan_Nagqu	-0.000883	0.001123	-0.786	306986
Kusunda	Tibetan_Lhasa	Tibetan_Nagqu	-0.000343	0.000438	-0.785	408680
Tibetan_Lhasa	Russia_Karasuk	Tibetan_Nagqu	-0.000408	0.000519	-0.785	408147
Sherpa_Nepal	Khakass_Koibals	Tibetan_Nagqu	-0.000442	0.000563	-0.785	397722
Tibetan_Shigatse	Jinchankou_LN	Tibetan_Nagqu	-0.000594	0.00076	-0.782	277544
Russia_Poltavka	Jinchankou_LN	Tibetan_Nagqu	-0.001061	0.001356	-0.782	273774
Kankanaey	Sherpa_Nepal	Tibetan_Nagqu	-0.000434	0.000557	-0.779	389518
Tibetan_Chamdo	Mongolia_EIA_2	Tibetan_Nagqu	-0.000589	0.000756	-0.778	296109
Sherpa_Nepal	Mongolia_MBA_1_Munkhkhairkhan	Tibetan_Nagqu	-0.000593	0.000764	-0.777	350089
Russian_Pinezhsky	Miaozigou_MN	Tibetan_Nagqu	-0.001008	0.001298	-0.776	110588
Visayan	Tibetan_Shannan	Tibetan_Nagqu	-0.000377	0.000488	-0.773	395782
Tibetan_Lhasa	Chuvash	Tibetan_Nagqu	-0.000359	0.000467	-0.77	431158
Sherpa_Nepal	Mongolia_EBA_1_Ulgii	Tibetan_Nagqu	-0.000505	0.000656	-0.769	351992
Tibetan_Shigatse	Shirenzigou_IA	Tibetan_Nagqu	-0.000455	0.000593	-0.767	280885
Tibetan_Chamdo	Mogushan_Xianbei_IA	Tibetan_Nagqu	-0.000586	0.000763	-0.767	103248
Sherpa_Nepal	Tubalar	Tibetan_Nagqu	-0.000379	0.000496	-0.765	425196
Russia_Sintashta_MLBA	Lajia_LN	Tibetan_Nagqu	-0.000747	0.000976	-0.765	340633
Tibetan_Chamdo	Evenk_Transbaikal	Tibetan_Nagqu	-0.000299	0.000391	-0.764	402876
BoY	Sherpa_Nepal	Tibetan_Nagqu	-0.000428	0.000561	-0.763	393221
Lak	Lajia_LN	Tibetan_Nagqu	-0.000597	0.000789	-0.757	416323
Miaozigou_MN	Shirenzigou_IA_W	Tibetan_Nagqu	-0.002471	0.003267	-0.756	32198
Russian_Leshukonsky	Miaozigou_MN	Tibetan_Nagqu	-0.000965	0.001281	-0.753	110284
Tibetan_Chamdo	Xibo_HGDP	Tibetan_Nagqu	-0.000266	0.000354	-0.752	401134
Htin_Mal	Tibetan_Shannan	Tibetan_Nagqu	-0.000348	0.000465	-0.749	393127
Qiang_Danba	Shirenzigou_IA	Tibetan_Nagqu	-0.00044	0.000589	-0.748	279233
TibetanHO_Yunnan	Russia_Late_Sarmatian	Tibetan_Nagqu	-0.000572	0.000765	-0.747	373752
Mongol_Minorities	Sherpa_Nepal	Tibetan_Nagqu	-0.00034	0.000456	-0.746	406367
Sherpa_Nepal	Kyrgyz_Urumqi	Tibetan_Nagqu	-0.000355	0.000476	-0.746	420480
Sherpa_Nepal	Kirghiz	Tibetan_Nagqu	-0.000436	0.000586	-0.745	397023
Kabardinian	Tibetan_Lhasa	Tibetan_Nagqu	-0.000391	0.000526	-0.744	424759
Kubachinian	Qiang_Daofu	Tibetan_Nagqu	-0.00041	0.000554	-0.74	420049
Dong_Hunan	Nepal_Samdzong_1500BP	Tibetan_Nagqu	-0.000428	0.000578	-0.74	389083
Nung	Sherpa_Nepal	Tibetan_Nagqu	-0.00036	0.000489	-0.735	395883
Tibetan_Shigatse	Shor_Khakassia	Tibetan_Nagqu	-0.000359	0.000492	-0.731	404028
Tibetan_Shannan	Shor_Khakassia	Tibetan_Nagqu	-0.000388	0.000533	-0.728	402870
Eskimo_Naukan	Tibetan_Shigatse	Tibetan_Nagqu	-0.000349	0.000479	-0.727	400723
Dongxiang_Linxia	Sherpa_Nepal	Tibetan_Nagqu	-0.000355	0.000488	-0.727	399114
Tibetan_Chamdo	Jiaozuoniecun_LBIA	Tibetan_Nagqu	-0.000373	0.000514	-0.726	361040
Tibetan_Shigatse	Haojiatai_LBIA	Tibetan_Nagqu	-0.000539	0.000743	-0.725	309246
Tibetan_Lhasa	Bashkir_north	Tibetan_Nagqu	-0.000329	0.000456	-0.722	435439
Russian_Pinezhsky	Lajia_LN	Tibetan_Nagqu	-0.000583	0.000807	-0.722	403987
Tibetan_Shigatse	Uzbek_Khorezm	Tibetan_Nagqu	-0.000326	0.000451	-0.721	416424
Liangdao1_EN	Zhalainuoer_IA	Tibetan_Nagqu	-0.004378	0.006069	-0.721	9294
Tibetan_Lhasa	Banlashan_MN	Tibetan_Nagqu	-0.000467	0.000648	-0.72	387389
Abazin	Jinchankou_LN	Tibetan_Nagqu	-0.00081	0.001127	-0.719	297578
Mogolian_HGDP	Tibetan_Chamdo	Tibetan_Nagqu	-0.000275	0.000384	-0.718	400397
Tibetan_Shigatse	Nogai2	Tibetan_Nagqu	-0.000283	0.000395	-0.717	426263
Gurung_Nepal	Sherpa_Nepal	Tibetan_Nagqu	-0.000364	0.00051	-0.714	389945
TibetanHO_Yunnan	Kumyk	Tibetan_Nagqu	-0.000499	0.0007	-0.713	423576
Malay	Tibetan_Shannan	Tibetan_Nagqu	-0.000299	0.00042	-0.712	406892
Sherpa_Nepal	Nogai2	Tibetan_Nagqu	-0.000362	0.000508	-0.712	423336
Tibetan_Lhasa	Xitoucun_LN	Tibetan_Nagqu	-0.000444	0.000624	-0.711	216297
Zhuang_Guangxi	Sherpa_Nepal	Tibetan_Nagqu	-0.000317	0.000447	-0.71	403784
Mongolia_EIA_8	Nepal_Mebrak_2125BP	Tibetan_Nagqu	-0.001263	0.001784	-0.708	192605
Tu_HGDP	Sherpa_Nepal	Tibetan_Nagqu	-0.000307	0.000434	-0.707	400055
Russian_Leshukonsky	Sherpa_Nepal	Tibetan_Nagqu	-0.000499	0.000707	-0.706	410141
Tibetan_Lhasa	Ekven_IA	Tibetan_Nagqu	-0.000366	0.00052	-0.704	395245
Mongolia_LBA_1_MongunTaiga	Nepal_Mebrak_2125BP	Tibetan_Nagqu	-0.001429	0.002039	-0.701	125173
Han_Shanghai	Nepal_Chokhopani_2700BP	Tibetan_Nagqu	-0.000825	0.001181	-0.699	370197
Sherpa_Nepal	Mongolia_IA_Xianbei	Tibetan_Nagqu	-0.000641	0.000919	-0.698	293470
Tibetan_Shannan	Tatar_Siberian	Tibetan_Nagqu	-0.000298	0.000428	-0.696	431056
Tibetan_Lhasa	Udmurt	Tibetan_Nagqu	-0.000339	0.000486	-0.696	422385
Sherpa_Nepal	Karakalpak	Tibetan_Nagqu	-0.000337	0.000484	-0.695	431859
Tibetan_Xunhua	Nepal_Chokhopani_2700BP	Tibetan_Nagqu	-0.000694	0.001	-0.694	378118
Jinchankou_LN	Mongolia_Chalcolithic_1_Afanasievo	Tibetan_Nagqu	-0.001264	0.001821	-0.694	202224
Sherpa_Nepal	Russia_OldBeringSea_Ekven	Tibetan_Nagqu	-0.000414	0.000599	-0.691	387569
Kinh_Vietnam	Sherpa_Nepal	Tibetan_Nagqu	-0.000326	0.000472	-0.69	398300
Tibetan_Shannan	XiongNu	Tibetan_Nagqu	-0.000368	0.000534	-0.689	391630
Giarai	Tibetan_Shigatse	Tibetan_Nagqu	-0.000271	0.000395	-0.685	409463
Banlashan_MN	Nepal_Mebrak_2125BP	Tibetan_Nagqu	-0.001019	0.001489	-0.685	251565
Russian_Pinezhsky	TibetanHO_Yunnan	Tibetan_Nagqu	-0.000508	0.000744	-0.683	411051
TibetanHO_Yunnan	Mongolia_EBA_2_Chemurchek	Tibetan_Nagqu	-0.000611	0.000895	-0.683	327648
Tibetan_Shigatse	Liangdao1_EN	Tibetan_Nagqu	-0.000524	0.000768	-0.682	170177
Tibetan_Shigatse	Bashkir_south	Tibetan_Nagqu	-0.000287	0.000421	-0.681	435129
Dungan	Sherpa_Nepal	Tibetan_Nagqu	-0.000289	0.000426	-0.678	410370
Tibetan_Chamdo	Yumin_EN	Tibetan_Nagqu	-0.000481	0.00071	-0.678	321573
Gelao_Longlin	Nepal_Samdzong_1500BP	Tibetan_Nagqu	-0.000372	0.00055	-0.677	393804
Buryat_Ehirit	Nepal_Chokhopani_2700BP	Tibetan_Nagqu	-0.000584	0.000864	-0.676	391470
Sherpa_Nepal	Longtoushan_BA	Tibetan_Nagqu	-0.000545	0.000807	-0.675	212690
Ingushian	Lajia_LN	Tibetan_Nagqu	-0.000527	0.000783	-0.674	418171
Sherpa_Nepal	Tibetan_Lhasa	Tibetan_Nagqu	-0.000291	0.000433	-0.672	392161
Sherpa_Nepal	Wanggou_MN	Tibetan_Nagqu	-0.000454	0.000676	-0.672	313721
Russian	Miaozigou_MN	Tibetan_Nagqu	-0.000813	0.00121	-0.672	121444
Russian_HGDP	Jinchankou_LN	Tibetan_Nagqu	-0.000753	0.001123	-0.67	309350
Tibetan_Chamdo	Negidal	Tibetan_Nagqu	-0.000299	0.000447	-0.669	393067
BoY	Nepal_Samdzong_1500BP	Tibetan_Nagqu	-0.000435	0.00065	-0.669	390911
Russia_Shamanka_EBA	Nepal_Mebrak_2125BP	Tibetan_Nagqu	-0.000914	0.001366	-0.669	230857
Veps	Miaozigou_MN	Tibetan_Nagqu	-0.000823	0.001233	-0.667	113221
Qiang_Danba	Tibetan_Chamdo	Tibetan_Nagqu	-0.000233	0.000349	-0.666	398833
Khamnegan	Sherpa_Nepal	Tibetan_Nagqu	-0.000324	0.000489	-0.662	399754
Tibetan_Chamdo	Liangdao2_EN	Tibetan_Nagqu	-0.000481	0.000726	-0.662	329839
Tajik	TibetanHO_Yunnan	Tibetan_Nagqu	-0.000443	0.000672	-0.659	421264
Han_Zhejiang	Nepal_Samdzong_1500BP	Tibetan_Nagqu	-0.000399	0.000608	-0.657	383921
XiongNu	Nepal_Samdzong_1500BP	Tibetan_Nagqu	-0.000501	0.00077	-0.65	375243
Kurd	Shimao_LN	Tibetan_Nagqu	-0.000587	0.000904	-0.65	415833
Han_Fujian	Nepal_Samdzong_1500BP	Tibetan_Nagqu	-0.000393	0.000606	-0.648	384731
Ulchi	Nepal_Mebrak_2125BP	Tibetan_Nagqu	-0.000527	0.000812	-0.648	277662
Qiang_Danba	Russia_IA	Tibetan_Nagqu	-0.000328	0.000508	-0.646	397539
Tibetan_Shigatse	Tubalar	Tibetan_Nagqu	-0.000263	0.00041	-0.641	428280
Tibetan_Chamdo	Wadian_LN	Tibetan_Nagqu	-0.00033	0.000516	-0.639	390092
Tibetan_Shannan	Mongolia_Medieval	Tibetan_Nagqu	-0.000543	0.00085	-0.639	196709
Mongolia_IA_Xianbei	Nepal_Samdzong_1500BP	Tibetan_Nagqu	-0.000742	0.001161	-0.639	288244
Buryat_Selenginsky	Nepal_Samdzong_1500BP	Tibetan_Nagqu	-0.000398	0.000624	-0.638	392174
Tibetan_Gangcha	Nepal_Mebrak_2125BP	Tibetan_Nagqu	-0.000429	0.000673	-0.638	280873
Aleut	Qiang_Danba	Tibetan_Nagqu	-0.000329	0.000517	-0.637	417621
Qiang_Daofu	XiongNu_WE	Tibetan_Nagqu	-0.000396	0.000622	-0.637	360581
Russia_Alan	Lajia_LN	Tibetan_Nagqu	-0.000577	0.000906	-0.636	380863
Sherpa_Nepal	Mongolia_EIA_7_Xiongnu	Tibetan_Nagqu	-0.000564	0.000889	-0.635	280143
Tibetan_Shannan	Mongolia_BA_1	Tibetan_Nagqu	-0.000492	0.000776	-0.634	306752
Tibetan_Shigatse	Tofalar	Tibetan_Nagqu	-0.00026	0.000416	-0.626	407820
Tibetan_Shigatse	Mongolia_EIA_4_Sagly	Tibetan_Nagqu	-0.000282	0.000452	-0.624	410477
Nivkh	Nepal_Samdzong_1500BP	Tibetan_Nagqu	-0.000385	0.000627	-0.615	388187
Mongolia_MBA_2_Munkhkhairkhan	Nepal_Mebrak_2125BP	Tibetan_Nagqu	-0.001111	0.001808	-0.615	201294
Tibetan_Shigatse	Xiaojingshan_EN	Tibetan_Nagqu	-0.000366	0.000596	-0.614	218850
Atayal	Nepal_Samdzong_1500BP	Tibetan_Nagqu	-0.000429	0.000701	-0.612	386726
TibetanHO_Yunnan	Russia_MLBA_Krasnoyarsk	Tibetan_Nagqu	-0.000421	0.000691	-0.608	399307
Abazin	Lajia_LN	Tibetan_Nagqu	-0.000466	0.000766	-0.608	414308
Tibetan_Shigatse	Tatar_Siberian	Tibetan_Nagqu	-0.000241	0.000398	-0.606	431391
Dai_HGDP	Sherpa_Nepal	Tibetan_Nagqu	-0.0003	0.000497	-0.603	396419
Kumyk	Jinchankou_LN	Tibetan_Nagqu	-0.000708	0.001182	-0.599	299683
Khamnegan	Tibetan_Chamdo	Tibetan_Nagqu	-0.000219	0.000367	-0.597	405905
Russia_Lokomotiv_Eneolithic	Nepal_Mebrak_2125BP	Tibetan_Nagqu	-0.000855	0.001436	-0.595	223441
Russia_Caucasus_EBA_Yamnaya	Miaozigou_MN	Tibetan_Nagqu	-0.001163	0.001958	-0.594	79853
Ossetian	TibetanHO_Yunnan	Tibetan_Nagqu	-0.000388	0.000655	-0.593	432704
Tatar_Zabolotniye	Nepal_Mebrak_2125BP	Tibetan_Nagqu	-0.000655	0.001106	-0.593	273449
Tibetan_Lhasa	Wuqi_EN	Tibetan_Nagqu	-0.000553	0.000935	-0.591	75601
Longtoushan_BA	Shirenzigou_IA_E	Tibetan_Nagqu	-0.002283	0.003868	-0.59	21005
Russian	Lajia_LN	Tibetan_Nagqu	-0.000435	0.000739	-0.589	441693
Daur_HGDP	Tibetan_Chamdo	Tibetan_Nagqu	-0.000215	0.000367	-0.585	403636
Kubachinian	Jinchankou_LN	Tibetan_Nagqu	-0.00077	0.001317	-0.585	291263
Tamang_Nepal	Tibetan_Yajiang	Tibetan_Nagqu	-0.000226	0.000387	-0.584	404479
Kabardinian	Qiang_Daofu	Tibetan_Nagqu	-0.000291	0.000502	-0.58	426582
Mongolia_EIA_1_SlabGrave	Nepal_Mebrak_2125BP	Tibetan_Nagqu	-0.000529	0.000918	-0.576	260603
Russia_Srubnaya_Alakul	Miaozigou_MN	Tibetan_Nagqu	-0.000804	0.001397	-0.576	109314
Tibetan_Chamdo	Yi_HGDP	Tibetan_Nagqu	-0.000204	0.000356	-0.571	400151
Tibetan_Xunhua	Nepal_Samdzong_1500BP	Tibetan_Nagqu	-0.000372	0.000655	-0.568	382433
Tibetan_Lhasa	Boisman_MN	Tibetan_Nagqu	-0.000273	0.000481	-0.567	366592
Jinchankou_LN	Mongolia_EBA_2_Chemurchek	Tibetan_Nagqu	-0.000925	0.001632	-0.567	229394
Tibetan_Lhasa	Tatar_Kazan	Tibetan_Nagqu	-0.000269	0.000476	-0.566	429849
Tibetan_Shigatse	Tatar_Mishar	Tibetan_Nagqu	-0.000279	0.000493	-0.566	427455
Tibetan_Lhasa	Russia_Alan	Tibetan_Nagqu	-0.000341	0.000602	-0.566	399571
Sherpa_Nepal	Taiwan_Hanben	Tibetan_Nagqu	-0.000293	0.000518	-0.565	403957
Thai	Sherpa_Nepal	Tibetan_Nagqu	-0.000264	0.000468	-0.564	413663
Russia_Sarmatian	Jinchankou_LN	Tibetan_Nagqu	-0.000832	0.001478	-0.563	232683
Mongolia_LBA_2_Ulaanzukh	Nepal_Samdzong_1500BP	Tibetan_Nagqu	-0.000424	0.000758	-0.56	333964
Lajia_LN	Mongolia_Chalcolithic_1_Afanasievo	Tibetan_Nagqu	-0.000654	0.001174	-0.558	280966
Qiang_Daofu	Tatar_Kazan	Tibetan_Nagqu	-0.000258	0.000464	-0.556	431508
Tibetan_Shigatse	China_Tianyuan	Tibetan_Nagqu	-0.000444	0.0008	-0.555	337460
PaThen	Tibetan_Chamdo	Tibetan_Nagqu	-0.000221	0.0004	-0.553	397972
Qiang_Danba	Mongolia_EIA_7_Xiongnu	Tibetan_Nagqu	-0.000424	0.000768	-0.552	288113
Sherpa_Nepal	Mongolia_EIA_4_Sagly	Tibetan_Nagqu	-0.000315	0.000573	-0.55	404094
LoLo	Nepal_Samdzong_1500BP	Tibetan_Nagqu	-0.000336	0.000612	-0.549	389933
Wadian_LN	Nepal_Samdzong_1500BP	Tibetan_Nagqu	-0.000479	0.000871	-0.549	370152
TibetanHO_Yunnan	Shirenzigou_IA_E	Tibetan_Nagqu	-0.000886	0.001618	-0.548	37393
Tibetan_Shigatse	Wuqi_EN	Tibetan_Nagqu	-0.000514	0.00094	-0.547	75884
Tibetan_Chamdo	Xiaojingshan_EN	Tibetan_Nagqu	-0.000316	0.00058	-0.546	219321
Han_Jiangsu	Shirenzigou_IA_E	Tibetan_Nagqu	-0.000727	0.001332	-0.546	38300
Longtoushan_BA	Nepal_Chokhopani_2700BP	Tibetan_Nagqu	-0.00092	0.001687	-0.545	205598
Sherpa_Nepal	Chuvash	Tibetan_Nagqu	-0.000326	0.000601	-0.543	428722
Tibetan_Lhasa	Qihe_EN	Tibetan_Nagqu	-0.000448	0.000826	-0.543	130643
Sherpa_Nepal	Yumin_EN	Tibetan_Nagqu	-0.000486	0.000897	-0.542	309780
Russia_Andronovo	Jinchankou_LN	Tibetan_Nagqu	-0.00076	0.001402	-0.542	272708
Qiang_Danba	Russia_Tagar	Tibetan_Nagqu	-0.000304	0.000561	-0.541	403009
Atayal	Shirenzigou_IA_E	Tibetan_Nagqu	-0.000979	0.001813	-0.54	38179
Qiang_Daofu	Mongolia_EIA_4_Sagly	Tibetan_Nagqu	-0.000238	0.000441	-0.539	411467
Sherpa_Nepal	Mongolia_LBA_2_Ulaanzukh	Tibetan_Nagqu	-0.000322	0.000602	-0.535	339001
Tajik	Lajia_LN	Tibetan_Nagqu	-0.0004	0.000748	-0.535	415033
Buryat_Bohansky	Sherpa_Nepal	Tibetan_Nagqu	-0.000307	0.000575	-0.534	391335
Tibetan_Lhasa	Russia_Tagar	Tibetan_Nagqu	-0.000281	0.000529	-0.532	403067
Buryat_Bohansky	Nepal_Mebrak_2125BP	Tibetan_Nagqu	-0.000535	0.001005	-0.532	265135
Russia_North_Caucasus	Jinchankou_LN	Tibetan_Nagqu	-0.000774	0.001455	-0.532	217276
Russian	TibetanHO_Yunnan	Tibetan_Nagqu	-0.000348	0.00066	-0.528	447037
Tibetan_Shigatse	Zhalainuoer_EN	Tibetan_Nagqu	-0.000501	0.000952	-0.526	70620
TibetanHO_Yunnan	Russia_EBA_Yamnaya_Samara	Tibetan_Nagqu	-0.00039	0.000745	-0.523	393390
Sherpa_Nepal	Khovsgol_LBA	Tibetan_Nagqu	-0.000275	0.000527	-0.522	384779
Tibetan_Lhasa	Russia_Late_Sarmatian	Tibetan_Nagqu	-0.000314	0.000606	-0.519	383422
Tibetan_Lhasa	Selkup	Tibetan_Nagqu	-0.000221	0.000431	-0.514	424889
Tibetan_Shannan	Selkup	Tibetan_Nagqu	-0.000235	0.000458	-0.514	424797
Dai_Xishuangbanna1k	Sherpa_Nepal	Tibetan_Nagqu	-0.000226	0.00044	-0.513	414851
Abkhasian	TibetanHO_Yunnan	Tibetan_Nagqu	-0.000355	0.000692	-0.513	425125
TibetanHO_Yunnan	Russia_Sintashta_MLBA	Tibetan_Nagqu	-0.000441	0.000869	-0.507	349263
Russian_Pinezhsky	Shimao_LN	Tibetan_Nagqu	-0.000446	0.00088	-0.507	404531
TibetanHO_Yunnan	Karelian	Tibetan_Nagqu	-0.000342	0.000677	-0.505	428119
Sherpa_Nepal	Bashkir_south	Tibetan_Nagqu	-0.000274	0.000543	-0.504	432917
Qiang_Daofu	Tamang_Nepal	Tibetan_Nagqu	-0.000189	0.000375	-0.503	404765
Tibetan_Shigatse	Chuanyun_H	Tibetan_Nagqu	-0.000424	0.000842	-0.503	126508
Tibetan_Shannan	Mongolia_EIA_4_Sagly	Tibetan_Nagqu	-0.000247	0.000495	-0.498	409376
Han_Jiangsu	Tibetan_Chamdo	Tibetan_Nagqu	-0.000183	0.000369	-0.495	397779
Mongol_Uuld	Nepal_Samdzong_1500BP	Tibetan_Nagqu	-0.000267	0.000544	-0.491	406642
Han_Beijing1K	Nepal_Samdzong_1500BP	Tibetan_Nagqu	-0.000222	0.000454	-0.49	417085
Tibetan_Shigatse	Luoheguxiang_LBIA	Tibetan_Nagqu	-0.000275	0.000565	-0.488	359409
Tibetan_Lhasa	Liangdao2_EN	Tibetan_Nagqu	-0.000377	0.000774	-0.488	327396
Russia_Sintashta_MLBA	Jinchankou_LN	Tibetan_Nagqu	-0.000791	0.001636	-0.483	243905
Tibetan_Lhasa	Mongolia_BA_1	Tibetan_Nagqu	-0.000372	0.000771	-0.482	306925
Veps	Jinchankou_LN	Tibetan_Nagqu	-0.000579	0.001203	-0.482	296441
Koryak	Nepal_Samdzong_1500BP	Tibetan_Nagqu	-0.000334	0.000695	-0.481	389545
Baoan_Jishishan	Sherpa_Nepal	Tibetan_Nagqu	-0.000211	0.000441	-0.48	402056
Tibetan_Shigatse	UstBelaya_EBA	Tibetan_Nagqu	-0.000252	0.000524	-0.48	386135
Tamang_Nepal	Tibetan_Shannan	Tibetan_Nagqu	-0.000196	0.000411	-0.479	402664
PaThen	Sherpa_Nepal	Tibetan_Nagqu	-0.000247	0.000515	-0.479	390788
Tibetan_Shigatse	Mongolia_EIA_5	Tibetan_Nagqu	-0.000349	0.00073	-0.479	275251
Tibetan_Lhasa	Russia_Srubnaya_Alakul	Tibetan_Nagqu	-0.000265	0.000554	-0.478	414678
Russian_HGDP	TibetanHO_Yunnan	Tibetan_Nagqu	-0.000318	0.000668	-0.477	435599
Tibetan_Yajiang	Mongolia_BA_2	Tibetan_Nagqu	-0.000378	0.000794	-0.477	203772
Ossetian	Miaozigou_MN	Tibetan_Nagqu	-0.000585	0.001226	-0.477	117308
Shimao_LN	Nepal_Mebrak_2125BP	Tibetan_Nagqu	-0.000671	0.001405	-0.477	250545
Japanese_Tokyo1K	Nepal_Samdzong_1500BP	Tibetan_Nagqu	-0.000229	0.000482	-0.476	413253
Tibetan_Chamdo	Shirenzigou_IA_W	Tibetan_Nagqu	-0.000344	0.000724	-0.476	122780
Russia_North_Caucasus	Lajia_LN	Tibetan_Nagqu	-0.00045	0.000947	-0.476	301468
Tibetan_Chamdo	Wanggou_MN	Tibetan_Nagqu	-0.000244	0.000514	-0.475	325112
Tibetan_Shannan	Mogushan_Xianbei_IA	Tibetan_Nagqu	-0.000415	0.000873	-0.475	102392
Han_SichuanHO	Nepal_Samdzong_1500BP	Tibetan_Nagqu	-0.000266	0.000562	-0.473	388823
Tajik	Jinchankou_LN	Tibetan_Nagqu	-0.000547	0.001157	-0.473	298229
Tibetan_Shigatse	Tatar_Zabolotniye	Tibetan_Nagqu	-0.000238	0.000506	-0.471	408858
Xiaowu_MN	Nepal_Samdzong_1500BP	Tibetan_Nagqu	-0.000511	0.001092	-0.468	364129
Naxi_HGDP	Tibetan_Chamdo	Tibetan_Nagqu	-0.000168	0.000362	-0.465	399361
Tharu_Nepal	Tibetan_Shannan	Tibetan_Nagqu	-0.00022	0.000472	-0.465	406024
Tibetan_Shannan	Mansi	Tibetan_Nagqu	-0.000222	0.000482	-0.462	415168
TibetanHO_Yunnan	Tatar_Kazan	Tibetan_Nagqu	-0.000284	0.000619	-0.459	427066
Jiaozuoniecun_LBIA	Nepal_Samdzong_1500BP	Tibetan_Nagqu	-0.000405	0.000882	-0.459	342400
Qiang_Danba	Uzbek_Tashkent	Tibetan_Nagqu	-0.000211	0.000465	-0.453	423507
Newar_Nepal	Qiang_Daofu	Tibetan_Nagqu	-0.000176	0.00039	-0.452	413358
Tibetan_Yajiang	XiongNu_WE	Tibetan_Nagqu	-0.000312	0.000691	-0.452	358858
Jiaozuoniecun_LBIA	Shirenzigou_IA_E	Tibetan_Nagqu	-0.001286	0.002851	-0.451	33776
TibetanHO_Yunnan	Mongolia_EIA_4_Sagly	Tibetan_Nagqu	-0.000264	0.000586	-0.45	403393
Russia_Afanasievo	Lajia_LN	Tibetan_Nagqu	-0.000362	0.000804	-0.45	411555
Jinchankou_LN	Mongolia_BA_2	Tibetan_Nagqu	-0.000888	0.002014	-0.441	137992
Sherpa_Nepal	Veps	Tibetan_Nagqu	-0.00029	0.00066	-0.439	419559
Ukrainian	Lajia_LN	Tibetan_Nagqu	-0.000332	0.000759	-0.437	432413
Ukrainian	TibetanHO_Yunnan	Tibetan_Nagqu	-0.000293	0.000674	-0.435	438194
Sherpa_Nepal	Bianbian_EN	Tibetan_Nagqu	-0.000407	0.000935	-0.435	255195
Tajik_Mountain	Qiang_Daofu	Tibetan_Nagqu	-0.000204	0.000471	-0.434	430439
UstBelaya_EBA	Nepal_Chokhopani_2700BP	Tibetan_Nagqu	-0.000526	0.001218	-0.432	363668
Ingushian	Qiang_Daofu	Tibetan_Nagqu	-0.000226	0.000524	-0.431	429644
Tibetan_Shannan	Mongolia_LBA_1_MongunTaiga	Tibetan_Nagqu	-0.00035	0.000813	-0.431	186414
Tibetan_Lhasa	Veps	Tibetan_Nagqu	-0.000224	0.000524	-0.429	423194
Muong	Nepal_Samdzong_1500BP	Tibetan_Nagqu	-0.000251	0.000584	-0.429	395710
Tibetan_Chamdo	Luoheguxiang_LBIA	Tibetan_Nagqu	-0.000225	0.000525	-0.428	360362
TibetanHO_Yunnan	Mordovian	Tibetan_Nagqu	-0.000281	0.000658	-0.428	440636
Buryat_Ehirit	Nepal_Samdzong_1500BP	Tibetan_Nagqu	-0.000261	0.000614	-0.425	394785
Russian_Pinezhsky	Sherpa_Nepal	Tibetan_Nagqu	-0.000302	0.000714	-0.423	411771
Lak	Shimao_LN	Tibetan_Nagqu	-0.000377	0.00089	-0.423	417214
Russia_Alan	Jinchankou_LN	Tibetan_Nagqu	-0.000605	0.001434	-0.422	272119
Tibetan_Lhasa	Mordovian	Tibetan_Nagqu	-0.00021	0.000499	-0.421	442388
Tibetan_Lhasa	Russia_Sarmatian	Tibetan_Nagqu	-0.000253	0.000603	-0.42	342909
Mongolia_LBA_2_Ulaanzukh	Nepal_Mebrak_2125BP	Tibetan_Nagqu	-0.000495	0.00119	-0.416	230162
Mongolia_EBA_1_Ulgii	Nepal_Mebrak_2125BP	Tibetan_Nagqu	-0.000512	0.00123	-0.416	238075
Russian_Pinezhsky	Qiang_Daofu	Tibetan_Nagqu	-0.000219	0.000527	-0.415	418440
Tibetan_Shannan	Qihe_EN	Tibetan_Nagqu	-0.000341	0.000822	-0.415	130469
Zhalainuoer_IA	Nepal_Mebrak_2125BP	Tibetan_Nagqu	-0.002005	0.004833	-0.415	14061
Tibetan_Shigatse	Veps	Tibetan_Nagqu	-0.000217	0.000524	-0.414	423765
Dong_Hunan	Shirenzigou_IA_E	Tibetan_Nagqu	-0.000604	0.001466	-0.412	38433
Sherpa_Nepal	Mansi	Tibetan_Nagqu	-0.000243	0.000592	-0.411	410890
Mordovian	Miaozigou_MN	Tibetan_Nagqu	-0.000489	0.001191	-0.411	119727
Qiang_Daofu	Russia_Andronovo	Tibetan_Nagqu	-0.000241	0.000588	-0.41	403261
Tibetan_Shannan	Tatar_Zabolotniye	Tibetan_Nagqu	-0.000212	0.000517	-0.409	407658
Ket	Tibetan_Shigatse	Tibetan_Nagqu	-0.000181	0.000444	-0.408	416336
Tibetan_Lhasa	Tatar_Mishar	Tibetan_Nagqu	-0.000202	0.000501	-0.403	426754
Tibetan_Shigatse	Russia_Late_Sarmatian	Tibetan_Nagqu	-0.000242	0.0006	-0.403	384974
Tibetan_Shigatse	Russia_BA_Okunevo	Tibetan_Nagqu	-0.000198	0.000492	-0.402	410281
Qiang_Daofu	Tibetan_Chamdo	Tibetan_Nagqu	-0.000133	0.000332	-0.401	400937
Sherpa_Nepal	Haojiatai_LBIA	Tibetan_Nagqu	-0.000375	0.000936	-0.401	298634
Tajik_Lowland	Lajia_LN	Tibetan_Nagqu	-0.000285	0.000713	-0.4	420229
Ami	Sherpa_Nepal	Tibetan_Nagqu	-0.000213	0.000535	-0.397	392648
Tibetan_Chamdo	Chuanyun_H	Tibetan_Nagqu	-0.000313	0.000789	-0.397	126819
Sherpa_Nepal	Shirenzigou_IA	Tibetan_Nagqu	-0.000303	0.000765	-0.396	272252
Giarai	Tibetan_Shannan	Tibetan_Nagqu	-0.000167	0.000425	-0.393	408614
Tatar_Mishar	Lajia_LN	Tibetan_Nagqu	-0.000278	0.000712	-0.39	417188
Circassian	Qiang_Daofu	Tibetan_Nagqu	-0.000198	0.000509	-0.389	428265
Russian_Pinezhsky	Tibetan_Lhasa	Tibetan_Nagqu	-0.000213	0.000554	-0.385	416481
Sherpa_Nepal	Erdaojingzi_LN	Tibetan_Nagqu	-0.000267	0.000696	-0.384	323157
Russian_HGDP	Miaozigou_MN	Tibetan_Nagqu	-0.000463	0.001206	-0.384	118106
Yakut_HGDP	Nepal_Samdzong_1500BP	Tibetan_Nagqu	-0.000216	0.000563	-0.383	412398
Chuvash	Miaozigou_MN	Tibetan_Nagqu	-0.000434	0.001133	-0.383	116044
Sherpa_Nepal	DevilsCave_N	Tibetan_Nagqu	-0.000274	0.000718	-0.382	381311
Qiang_Daofu	Russia_BA_Okunevo	Tibetan_Nagqu	-0.000183	0.000481	-0.381	411281
Yugur_Sunan	Nepal_Chokhopani_2700BP	Tibetan_Nagqu	-0.000255	0.000668	-0.381	404765
Tibetan_Shannan	Mongolia_EBA_2_Chemurchek	Tibetan_Nagqu	-0.00026	0.000685	-0.38	336899
Miaozigou_MN	Mongolia_MBA_2_Munkhkhairkhan	Tibetan_Nagqu	-0.00085	0.002248	-0.378	80684
Buryat_Aginsky	Nepal_Samdzong_1500BP	Tibetan_Nagqu	-0.00021	0.000558	-0.376	406878
Haojiatai_LBIA	Nepal_Mebrak_2125BP	Tibetan_Nagqu	-0.00069	0.001848	-0.374	201300
Abazin	TibetanHO_Yunnan	Tibetan_Nagqu	-0.000244	0.000656	-0.373	420740
Tibetan_Shigatse	Ekven_IA	Tibetan_Nagqu	-0.000188	0.000507	-0.372	396790
Tibetan_Chamdo	Tibetan_Yajiang	Tibetan_Nagqu	-0.000125	0.000336	-0.371	400724
Yi_HGDP	Nepal_Mebrak_2125BP	Tibetan_Nagqu	-0.000282	0.00076	-0.371	268816
Ingushian	Miaozigou_MN	Tibetan_Nagqu	-0.000482	0.001298	-0.371	114808
Tibetan_Lhasa	Miaozigou_MN	Tibetan_Nagqu	-0.000311	0.000853	-0.365	105321
Tibetan_Lhasa	Mongolia_EIA_3	Tibetan_Nagqu	-0.000276	0.000758	-0.364	275662
Tatar_Mishar	Miaozigou_MN	Tibetan_Nagqu	-0.00044	0.001211	-0.364	114495
Tibetan_Lhasa	Taiwan_Gongguan	Tibetan_Nagqu	-0.000283	0.000781	-0.363	251509
Kumyk	Lajia_LN	Tibetan_Nagqu	-0.000281	0.000776	-0.362	417199
Lak	Miaozigou_MN	Tibetan_Nagqu	-0.00048	0.001334	-0.36	114116
Tibetan_Shigatse	Xiaogao_EN	Tibetan_Nagqu	-0.000254	0.000709	-0.359	336815
Mongolia_LBA_4_CenterWest	Nepal_Mebrak_2125BP	Tibetan_Nagqu	-0.000342	0.000955	-0.359	263085
Russia_Steppe_Maikop	Shimao_LN	Tibetan_Nagqu	-0.000373	0.001042	-0.358	345902
Tu_HGDP	Tibetan_Chamdo	Tibetan_Nagqu	-0.000121	0.000341	-0.354	405313
TibetanHO_Yunnan	Mongolia_EIA_7_Xiongnu	Tibetan_Nagqu	-0.000362	0.001023	-0.354	278894
Tajik_Mountain	Tibetan_Shigatse	Tibetan_Nagqu	-0.000171	0.000486	-0.352	429341
Abkhasian	Qiang_Daofu	Tibetan_Nagqu	-0.000183	0.000521	-0.352	430736
Tibetan_Lhasa	Russia_EBA_Yamnaya_Kalmykia	Tibetan_Nagqu	-0.000218	0.000627	-0.348	386902
Tibetan_Lhasa	Nogai	Tibetan_Nagqu	-0.000168	0.000486	-0.347	426705
Lahu_HGDP	Sherpa_Nepal	Tibetan_Nagqu	-0.000178	0.000514	-0.347	392096
Oroqen_HGDP	Nepal_Mebrak_2125BP	Tibetan_Nagqu	-0.000305	0.000884	-0.345	270036
Qiang_Daofu	Kumyk	Tibetan_Nagqu	-0.000182	0.000529	-0.344	429197
TibetanHO_Yunnan	Bashkir_north	Tibetan_Nagqu	-0.0002	0.000582	-0.344	433312
Tibetan_Shigatse	Chuvash	Tibetan_Nagqu	-0.000164	0.000477	-0.343	431779
TibetanHO_Yunnan	Russia_Afanasievo	Tibetan_Nagqu	-0.000242	0.000705	-0.343	418691
Karelian	Jinchankou_LN	Tibetan_Nagqu	-0.000396	0.001153	-0.343	303448
Sila	Tibetan_Chamdo	Tibetan_Nagqu	-0.000134	0.000394	-0.34	397521
Sherpa_Nepal	Vietnam_Lahu	Tibetan_Nagqu	-0.000167	0.000493	-0.338	392788
Buryat_Selenginsky	Nepal_Mebrak_2125BP	Tibetan_Nagqu	-0.000317	0.000938	-0.337	267833
Korean	Tibetan_Chamdo	Tibetan_Nagqu	-0.000131	0.000391	-0.335	396946
Ossetian	Lajia_LN	Tibetan_Nagqu	-0.000247	0.000736	-0.335	426892
TibetanHO_Yunnan	Russia_BA_Okunevo	Tibetan_Nagqu	-0.000217	0.00065	-0.334	401493
Sherpa_Nepal	Wuqi_EN	Tibetan_Nagqu	-0.000426	0.001274	-0.334	73267
Dao	Nepal_Samdzong_1500BP	Tibetan_Nagqu	-0.000183	0.000549	-0.333	394454
Mongolia_LBA_5_CenterWest	Nepal_Chokhopani_2700BP	Tibetan_Nagqu	-0.000482	0.001449	-0.333	352858
Gurung_Nepal	Tibetan_Yajiang	Tibetan_Nagqu	-0.000142	0.00043	-0.33	398093
Tibetan_Shigatse	Bashkir_central	Tibetan_Nagqu	-0.000148	0.000449	-0.33	434173
Russia_Alan	Shimao_LN	Tibetan_Nagqu	-0.000349	0.001059	-0.33	380797
Tibetan_Shigatse	Udmurt	Tibetan_Nagqu	-0.000158	0.000483	-0.327	423210
Wanggou_MN	Nepal_Samdzong_1500BP	Tibetan_Nagqu	-0.000278	0.000848	-0.327	308329
Qiang_Danba	Mansi	Tibetan_Nagqu	-0.000153	0.000469	-0.326	415566
Shimao_LN	Nepal_Samdzong_1500BP	Tibetan_Nagqu	-0.000272	0.000836	-0.326	368449
Tajik_Mountain	Miaozigou_MN	Tibetan_Nagqu	-0.000369	0.001131	-0.326	115318
Adygei	Miaozigou_MN	Tibetan_Nagqu	-0.000388	0.001204	-0.322	119537
Tibetan_Shigatse	Wuzhuangguoliang	Tibetan_Nagqu	-0.000259	0.000806	-0.321	55727
Kurd	Miaozigou_MN	Tibetan_Nagqu	-0.000414	0.001298	-0.319	113752
Qiang_Daofu	Udmurt	Tibetan_Nagqu	-0.000152	0.000478	-0.318	424279
Sherpa_Nepal	Boisman_MN	Tibetan_Nagqu	-0.000189	0.000596	-0.317	357787
Tibetan_Shigatse	Mongolia_EBA_2_Chemurchek	Tibetan_Nagqu	-0.000204	0.000651	-0.314	338398
Qiang_Daofu	Shirenzigou_IA_E	Tibetan_Nagqu	-0.000359	0.001152	-0.312	38968
Han_Hubei	Sherpa_Nepal	Tibetan_Nagqu	-0.000162	0.000523	-0.311	387377
Mlabri	Tibetan_Shannan	Tibetan_Nagqu	-0.000182	0.000583	-0.311	387291
Buryat_Duldurginsky	Sherpa_Nepal	Tibetan_Nagqu	-0.000173	0.000563	-0.307	391153
Qiang_Daofu	Shirenzigou_IA	Tibetan_Nagqu	-0.000177	0.000575	-0.307	281528
Tibetan_Yajiang	Mongolia_MBA_2_Munkhkhairkhan	Tibetan_Nagqu	-0.00024	0.000785	-0.306	304545
Russian_Krasnoborsky	Lajia_LN	Tibetan_Nagqu	-0.000228	0.000749	-0.304	407016
Han_Henan	Nepal_Samdzong_1500BP	Tibetan_Nagqu	-0.000184	0.000606	-0.303	384556
Haminmangha_MN	Nepal_Samdzong_1500BP	Tibetan_Nagqu	-0.000361	0.001196	-0.302	223529
Lajia_LN	Mongolia_LBA_5_CenterWest	Tibetan_Nagqu	-0.000277	0.000919	-0.301	352363
Han_SouthChina1K	Nepal_Samdzong_1500BP	Tibetan_Nagqu	-0.000137	0.00046	-0.299	414483
Qiang_Daofu	Russia_Sarmatian	Tibetan_Nagqu	-0.000176	0.000594	-0.296	345191
Mongolia_MBA_1_Munkhkhairkhan	Nepal_Chokhopani_2700BP	Tibetan_Nagqu	-0.000434	0.001469	-0.296	339402
Sherpa_Nepal	UstBelaya_EBA	Tibetan_Nagqu	-0.000199	0.000685	-0.29	374460
Mongol_Zasagt	Sherpa_Nepal	Tibetan_Nagqu	-0.000144	0.000498	-0.289	399661
Sherpa_Nepal	Russia_UstBelaya_Angara	Tibetan_Nagqu	-0.000164	0.000577	-0.284	371284
Shirenzigou_IA_E	Xiaowu_MN	Tibetan_Nagqu	-0.000944	0.003362	-0.281	35777
Tibetan_Lhasa	Russia_Caucasus_EBA_Yamnaya	Tibetan_Nagqu	-0.000185	0.000667	-0.277	294520
Shor_Mountain	Nepal_Mebrak_2125BP	Tibetan_Nagqu	-0.000276	0.000995	-0.277	273455
Qiang_Daofu	Mongolia_Chalcolithic_2_Afanasievo	Tibetan_Nagqu	-0.000201	0.000729	-0.275	282437
Sherpa_Nepal	Mongolia_N_East	Tibetan_Nagqu	-0.000204	0.00075	-0.273	338259
Han_Shanghai	Nepal_Mebrak_2125BP	Tibetan_Nagqu	-0.000324	0.00119	-0.272	255310
Qiang_Danba	Shor_Mountain	Tibetan_Nagqu	-0.000133	0.000491	-0.27	407329
Tu_HGDP	Nepal_Samdzong_1500BP	Tibetan_Nagqu	-0.000144	0.000535	-0.27	399029
Mogolian_HGDP	Nepal_Samdzong_1500BP	Tibetan_Nagqu	-0.000155	0.000575	-0.27	390215
Sherpa_Nepal	Taiwan_Gongguan	Tibetan_Nagqu	-0.000263	0.000983	-0.267	244117
Tibetan_Chamdo	Tibetan_Gangcha	Tibetan_Nagqu	-8e-05	0.000299	-0.266	411858
Abazin	Qiang_Daofu	Tibetan_Nagqu	-0.000131	0.000495	-0.265	426365
Tibetan_Lhasa	Jinchankou_LN	Tibetan_Nagqu	-0.00021	0.000791	-0.265	276193
Nanai	Nepal_Mebrak_2125BP	Tibetan_Nagqu	-0.000225	0.00086	-0.261	267567
Qiang_Daofu	Mongolia_EIA_7_Xiongnu	Tibetan_Nagqu	-0.000193	0.000742	-0.26	290724
Sherpa_Nepal	Mongolia_Medieval	Tibetan_Nagqu	-0.000258	0.000998	-0.259	190970
Nogai	Jinchankou_LN	Tibetan_Nagqu	-0.000262	0.001014	-0.258	299846
Tajik_Lowland	Tibetan_Shigatse	Tibetan_Nagqu	-0.00013	0.000506	-0.257	429603
Kinh_HGDP	Nepal_Mebrak_2125BP	Tibetan_Nagqu	-0.000214	0.000833	-0.257	269719
Mongolia_N_North	Nepal_Mebrak_2125BP	Tibetan_Nagqu	-0.000283	0.001111	-0.254	249784
Tibetan_Shannan	Russia_Steppe_Maikop	Tibetan_Nagqu	-0.000166	0.000665	-0.25	362344
Eskimo_ChaplinSireniki	Nepal_Samdzong_1500BP	Tibetan_Nagqu	-0.000178	0.000728	-0.245	389124
Dao	Sherpa_Nepal	Tibetan_Nagqu	-0.000113	0.000468	-0.241	395802
Qihe_EN	Shirenzigou_IA_E	Tibetan_Nagqu	-0.00132	0.005481	-0.241	12523
DevilsCave_N	Nepal_Samdzong_1500BP	Tibetan_Nagqu	-0.000206	0.00086	-0.24	375398
Sherpa_Nepal	Tanshishan_LN	Tibetan_Nagqu	-0.000204	0.000855	-0.239	154315
Karelian	Lajia_LN	Tibetan_Nagqu	-0.00018	0.000762	-0.237	422185
Tibetan_Shannan	Nogai2	Tibetan_Nagqu	-0.000103	0.000438	-0.234	425751
Tibetan_Gangcha	Nepal_Samdzong_1500BP	Tibetan_Nagqu	-0.000107	0.000459	-0.233	409234
Han_Shanghai	Tibetan_Chamdo	Tibetan_Nagqu	-0.000119	0.000511	-0.233	392504
Newar_Nepal	Qiang_Danba	Tibetan_Nagqu	-9.7e-05	0.000422	-0.23	411727
Tharu_Nepal	Tibetan_Shigatse	Tibetan_Nagqu	-9.9e-05	0.000435	-0.228	407120
Tibetan_Yajiang	Mongolia_Chalcolithic_2_Afanasievo	Tibetan_Nagqu	-0.000181	0.000794	-0.228	280783
Tibetan_Lhasa	Karelian	Tibetan_Nagqu	-0.000114	0.000506	-0.225	431067
Tibetan_Lhasa	Russia_MLBA_Krasnoyarsk	Tibetan_Nagqu	-0.000122	0.000542	-0.225	405276
Tlingit	TibetanHO_Yunnan	Tibetan_Nagqu	-0.000152	0.000679	-0.224	401061
Kinh_Vietnam	Nepal_Samdzong_1500BP	Tibetan_Nagqu	-0.000122	0.000548	-0.223	397379
Kubachinian	Tibetan_Lhasa	Tibetan_Nagqu	-0.000129	0.00058	-0.223	417971
Sherpa_Nepal	Tatar_Mishar	Tibetan_Nagqu	-0.000136	0.000629	-0.217	423708
Ossetian	Tibetan_Lhasa	Tibetan_Nagqu	-0.000109	0.000506	-0.216	435361
Tibetan_Shannan	Uzbek_Khorezm	Tibetan_Nagqu	-0.000103	0.000476	-0.215	415358
Russia_EBA_Yamnaya_Kalmykia	Lajia_LN	Tibetan_Nagqu	-0.000203	0.00095	-0.213	368163
Tajik	Shimao_LN	Tibetan_Nagqu	-0.000176	0.000839	-0.209	415978
Sherpa_Nepal	Mongolia_EIA_5	Tibetan_Nagqu	-0.000204	0.000982	-0.208	266368
Khakass_Sagai	Nepal_Mebrak_2125BP	Tibetan_Nagqu	-0.000184	0.000902	-0.204	282869
Sherpa_Nepal	Ekven_IA	Tibetan_Nagqu	-0.000129	0.00064	-0.202	385936
Tibetan_Shannan	Russia_BA_Okunevo	Tibetan_Nagqu	-0.000107	0.000538	-0.199	409060
TibetanHO_Yunnan	Russia_Bolshoy	Tibetan_Nagqu	-0.000141	0.000716	-0.197	355645
Qiang_Daofu	Mongolia_BA_2	Tibetan_Nagqu	-0.000159	0.000807	-0.197	205095
Xiaogao_EN	Nepal_Mebrak_2125BP	Tibetan_Nagqu	-0.000353	0.001794	-0.197	219533
Sherpa_Nepal	Kazakh_Aksay	Tibetan_Nagqu	-9.6e-05	0.00049	-0.196	408131
Tibetan_Yajiang	Russia_Steppe_Maikop	Tibetan_Nagqu	-0.000122	0.000628	-0.195	363561
Khamnegan	Nepal_Mebrak_2125BP	Tibetan_Nagqu	-0.000166	0.000861	-0.193	272466
Tatar_Kazan	Jinchankou_LN	Tibetan_Nagqu	-0.000201	0.001055	-0.191	303133
Tibetan_Chamdo	Tibetan_Gannan	Tibetan_Nagqu	-7.6e-05	0.000397	-0.19	400485
Qiang_Daofu	Bashkir_north	Tibetan_Nagqu	-8.7e-05	0.00046	-0.188	436826
Miao_HGDP	Tibetan_Chamdo	Tibetan_Nagqu	-6.7e-05	0.000357	-0.187	400672
Tatar_Mishar	Jinchankou_LN	Tibetan_Nagqu	-0.000196	0.001075	-0.182	299856
Miao_HGDP	Sherpa_Nepal	Tibetan_Nagqu	-8.6e-05	0.000478	-0.18	394263
Tajik	Miaozigou_MN	Tibetan_Nagqu	-0.000224	0.001251	-0.179	113892
Tibetan_Chamdo	TibetanHO_Yunnan	Tibetan_Nagqu	-7.8e-05	0.000439	-0.178	393677
Mang	Tibetan_Chamdo	Tibetan_Nagqu	-7.1e-05	0.000411	-0.174	398650
Qiang_Danba	Tatar_Siberian	Tibetan_Nagqu	-7.5e-05	0.000431	-0.173	431526
Tibetan_Lhasa	Russia_Andronovo	Tibetan_Nagqu	-0.000108	0.000624	-0.173	400674
Shirenzigou_IA_E	Nepal_Chokhopani_2700BP	Tibetan_Nagqu	-0.000592	0.003448	-0.172	36264
TibetanHO_Yunnan	Chuvash	Tibetan_Nagqu	-0.000101	0.000606	-0.167	428373
TibetanHO_Yunnan	Uzbek_Tashkent	Tibetan_Nagqu	-9.2e-05	0.000564	-0.163	419480
Mongolia_EIA_7_Xiongnu	Nepal_Chokhopani_2700BP	Tibetan_Nagqu	-0.000269	0.001668	-0.162	270681
Ede	Tibetan_Shigatse	Tibetan_Nagqu	-6.4e-05	0.000398	-0.161	408614
TibetanHO_Yunnan	Russia_Poltavka	Tibetan_Nagqu	-0.000122	0.000758	-0.161	390905
Russia_MLBA_Sintashta	Miaozigou_MN	Tibetan_Nagqu	-0.00021	0.00133	-0.158	112894
Tibetan_Shannan	Russia_EarlySarmatian_SouthernUrals	Tibetan_Nagqu	-9.9e-05	0.000638	-0.156	303883
Qiang_Daofu	Mongolia_EIA_5	Tibetan_Nagqu	-0.000115	0.000744	-0.155	276105
Sherpa_Nepal	Karelian	Tibetan_Nagqu	-0.0001	0.000663	-0.151	428436
Mongolia_N_North	Nepal_Samdzong_1500BP	Tibetan_Nagqu	-0.000112	0.000749	-0.15	364441
Chuvash	Nepal_Mebrak_2125BP	Tibetan_Nagqu	-0.000158	0.001056	-0.149	293933
Yi_HGDP	Mongolia_MBA_2_Munkhkhairkhan	Tibetan_Nagqu	-0.00011	0.000748	-0.147	305555
Tibetan_Shigatse	Miaozigou_MN	Tibetan_Nagqu	-0.000116	0.000796	-0.146	105926
Sherpa_Nepal	Mongolia_BA_1	Tibetan_Nagqu	-0.000143	0.000975	-0.146	297948
Russian_Krasnoborsky	Jinchankou_LN	Tibetan_Nagqu	-0.000173	0.00121	-0.143	292003
Han_Chongqing	Shirenzigou_IA_E	Tibetan_Nagqu	-0.000238	0.001684	-0.141	37337
Circassian	Tibetan_Lhasa	Tibetan_Nagqu	-7.4e-05	0.000532	-0.14	426497
Han_Shandong	Shirenzigou_IA_E	Tibetan_Nagqu	-0.000164	0.001206	-0.136	38893
Sherpa_Nepal	Miaozigou_MN	Tibetan_Nagqu	-0.000141	0.001045	-0.135	102194
Tibetan_Chamdo	Lajia_LN	Tibetan_Nagqu	-6.6e-05	0.000491	-0.134	387718
Nganasan	Nepal_Samdzong_1500BP	Tibetan_Nagqu	-8.5e-05	0.00064	-0.132	403918
TibetanHO_Yunnan	Uyghur_HGDP	Tibetan_Nagqu	-6.5e-05	0.000494	-0.131	419400
Tibetan_Shigatse	Xitoucun_LN	Tibetan_Nagqu	-7.8e-05	0.00059	-0.131	217234
Han_Guangdong	Nepal_Samdzong_1500BP	Tibetan_Nagqu	-7.5e-05	0.000576	-0.13	389898
Mongol_Minorities	Nepal_Mebrak_2125BP	Tibetan_Nagqu	-0.000109	0.000854	-0.128	277529
Evenk_Transbaikal	Nepal_Mebrak_2125BP	Tibetan_Nagqu	-0.000124	0.000975	-0.127	268781
Adygei	Tibetan_Lhasa	Tibetan_Nagqu	-6.4e-05	0.000521	-0.123	442524
TibetanHO_Yunnan	Russia_MLBA_Sintashta	Tibetan_Nagqu	-8.2e-05	0.000705	-0.116	417075
Hmong	Nepal_Samdzong_1500BP	Tibetan_Nagqu	-6.6e-05	0.000577	-0.114	396661
Banlashan_MN	Nepal_Chokhopani_2700BP	Tibetan_Nagqu	-0.00017	0.001517	-0.112	364457
Qiang_Daofu	Uzbek_Tashkent	Tibetan_Nagqu	-4.8e-05	0.000429	-0.111	424670
Han_Henan	Shirenzigou_IA_E	Tibetan_Nagqu	-0.000166	0.001495	-0.111	37979
TibetanHO_Yunnan	Russia_Caucasus_EBA_Yamnaya	Tibetan_Nagqu	-9.1e-05	0.000826	-0.11	286919
Tibetan_Shigatse	Bashkir_north	Tibetan_Nagqu	-5e-05	0.000458	-0.109	435970
Mogushan_Xianbei_IA	Nepal_Chokhopani_2700BP	Tibetan_Nagqu	-0.00023	0.002136	-0.108	95944
Sherpa_Nepal	Khakass_Sagai	Tibetan_Nagqu	-5.8e-05	0.000544	-0.107	413719
Sherpa_Nepal	Haminmangha_MN	Tibetan_Nagqu	-0.0001	0.000993	-0.101	227853
Jinchankou_LN	Mongolia_EIA_7_Xiongnu	Tibetan_Nagqu	-0.000182	0.001806	-0.101	194626
Tajik_Lowland	Miaozigou_MN	Tibetan_Nagqu	-0.000115	0.001169	-0.099	115416
Cham	Sherpa_Nepal	Tibetan_Nagqu	-4.8e-05	0.000495	-0.097	405054
Wanggou_MN	Mongolia_Chalcolithic_1_Afanasievo	Tibetan_Nagqu	-0.000127	0.001322	-0.096	237201
Circassian	TibetanHO_Yunnan	Tibetan_Nagqu	-6.5e-05	0.000681	-0.095	422949
Tibetan_Chamdo	China_Tianyuan	Tibetan_Nagqu	-7.3e-05	0.000773	-0.095	338210
Qiang_Daofu	China_Tianyuan	Tibetan_Nagqu	-7.5e-05	0.000788	-0.095	338216
Tibetan_Gangcha	Nepal_Chokhopani_2700BP	Tibetan_Nagqu	-5.9e-05	0.000628	-0.093	407271
Qiang_Daofu	Uzbek_Khorezm	Tibetan_Nagqu	-4.2e-05	0.000449	-0.092	417392
TibetanHO_Yunnan	Russia_Srubnaya_Alakul	Tibetan_Nagqu	-6.4e-05	0.000724	-0.088	407752
Russia_MLBA_Sintashta	Lajia_LN	Tibetan_Nagqu	-6.8e-05	0.000796	-0.085	410122
Tibetan_Shigatse	Mongolia_EIA_3	Tibetan_Nagqu	-6.3e-05	0.000752	-0.084	276986
Tibetan_Shannan	Mongolia_EIA_5	Tibetan_Nagqu	-6.2e-05	0.000756	-0.082	273945
Mongolia_BA_2	Nepal_Chokhopani_2700BP	Tibetan_Nagqu	-0.000155	0.00188	-0.082	191124
Russian_HGDP	Tibetan_Lhasa	Tibetan_Nagqu	-4.1e-05	0.000509	-0.081	437741
Tibetan_Chamdo	DevilsCave_N	Tibetan_Nagqu	-4.3e-05	0.000532	-0.081	394559
Sherpa_Nepal	Bashkir_north	Tibetan_Nagqu	-4.7e-05	0.00058	-0.081	433511
Miaozigou_MN	Nepal_Samdzong_1500BP	Tibetan_Nagqu	-0.00012	0.001495	-0.08	100254
Shirenzigou_IA_E	Wadian_LN	Tibetan_Nagqu	-0.00021	0.002623	-0.08	36397
Mongolia_EIA_8	Nepal_Chokhopani_2700BP	Tibetan_Nagqu	-0.000135	0.001713	-0.079	273599
Russian_Leshukonsky	TibetanHO_Yunnan	Tibetan_Nagqu	-5.7e-05	0.000724	-0.078	409565
Russia_MLBA_Krasnoyarsk	Jinchankou_LN	Tibetan_Nagqu	-9.5e-05	0.001225	-0.078	282058
Dacaozi_IA	Shirenzigou_IA_W	Tibetan_Nagqu	-0.000117	0.001533	-0.076	112684
Circassian	Lajia_LN	Tibetan_Nagqu	-5.7e-05	0.000751	-0.075	416729
Evenk_Transbaikal	Nepal_Samdzong_1500BP	Tibetan_Nagqu	-4.7e-05	0.000637	-0.073	393227
Tu_HGDP	Nepal_Mebrak_2125BP	Tibetan_Nagqu	-5.3e-05	0.000724	-0.073	273251
Tibetan_Shigatse	Russia_Bolshoy	Tibetan_Nagqu	-3.7e-05	0.000525	-0.071	365847
Tajik_Lowland	Shimao_LN	Tibetan_Nagqu	-5.6e-05	0.000804	-0.07	421260
Qiang_Daofu	Zhalainuoer_IA	Tibetan_Nagqu	-9.7e-05	0.001407	-0.069	21494
Tibetan_Yajiang	Mogushan_Xianbei_IA	Tibetan_Nagqu	-5.9e-05	0.000864	-0.068	102603
TibetanHO_Yunnan	Russia_Andronovo	Tibetan_Nagqu	-5.3e-05	0.000796	-0.067	391045
TibetanHO_Yunnan	Russia_Tagar	Tibetan_Nagqu	-4.3e-05	0.000694	-0.062	394337
Adygei	Tibetan_Shigatse	Tibetan_Nagqu	-2.9e-05	0.000509	-0.058	442973
Russian_Leshukonsky	Jinchankou_LN	Tibetan_Nagqu	-7.1e-05	0.001232	-0.058	288492
Tibetan_Lhasa	Russia_MLBA_Sintashta	Tibetan_Nagqu	-3.1e-05	0.000543	-0.057	422096
Sherpa_Nepal	Mongolia_EIA_2	Tibetan_Nagqu	-5.7e-05	0.00102	-0.056	286086
Adygei	Shimao_LN	Tibetan_Nagqu	-4.5e-05	0.000821	-0.055	436363
Tamang_Nepal	Tibetan_Shigatse	Tibetan_Nagqu	-2.1e-05	0.000393	-0.053	403978
Sherpa_Nepal	Xiaogao_EN	Tibetan_Nagqu	-4.8e-05	0.000925	-0.052	325470
TibetanHO_Yunnan	Russia_EarlySarmatian_SouthernUrals	Tibetan_Nagqu	-4e-05	0.000814	-0.05	295594
Han_Shanghai	Shirenzigou_IA_E	Tibetan_Nagqu	-0.000101	0.002029	-0.05	36889
Tajik	Tibetan_Lhasa	Tibetan_Nagqu	-2.5e-05	0.000523	-0.048	425165
Tibetan_Shigatse	Mongolia_LBA_1_MongunTaiga	Tibetan_Nagqu	-3.7e-05	0.000796	-0.046	187463
Tibetan_Shannan	Bashkir_central	Tibetan_Nagqu	-2.1e-05	0.000482	-0.043	433648
Tajik_Mountain	Tibetan_Lhasa	Tibetan_Nagqu	-2.1e-05	0.000493	-0.043	428802
Tibetan_Shannan	Chuvash	Tibetan_Nagqu	-2.1e-05	0.000498	-0.041	431115
Shirenzigou_IA_E	Tanshishan_LN	Tibetan_Nagqu	-0.000185	0.004507	-0.041	15132
Sherpa_Nepal	Bashkir_central	Tibetan_Nagqu	-2.3e-05	0.000578	-0.04	431746
Russian	Shimao_LN	Tibetan_Nagqu	-3.4e-05	0.000847	-0.04	443041
Kabardinian	Tibetan_Shigatse	Tibetan_Nagqu	-2e-05	0.00052	-0.039	425590
Qiang_Daofu	Nogai	Tibetan_Nagqu	-1.6e-05	0.000456	-0.036	428421
Ingushian	Tibetan_Lhasa	Tibetan_Nagqu	-1.9e-05	0.000531	-0.036	427810
Russian	Tibetan_Lhasa	Tibetan_Nagqu	-1.7e-05	0.000518	-0.034	448604
Tibetan_Shannan	Xitoucun_LN	Tibetan_Nagqu	-2.1e-05	0.000635	-0.033	216193
Tibetan_Gannan	Nepal_Samdzong_1500BP	Tibetan_Nagqu	-1.9e-05	0.000597	-0.031	389245
Tibetan_Chamdo	Mongolia_Medieval	Tibetan_Nagqu	-2.4e-05	0.000782	-0.03	198112
Sherpa_Nepal	Mongolia_Mongol	Tibetan_Nagqu	-2.2e-05	0.000766	-0.028	315376
Kabardinian	Miaozigou_MN	Tibetan_Nagqu	-3.4e-05	0.001237	-0.028	113763
Russian_Krasnoborsky	Qiang_Daofu	Tibetan_Nagqu	-1.3e-05	0.000517	-0.024	420498
Mlabri	Tibetan_Shigatse	Tibetan_Nagqu	-1.3e-05	0.000595	-0.021	388819
Aleut	Tibetan_Lhasa	Tibetan_Nagqu	-1e-05	0.000494	-0.02	417205
Sherpa_Nepal	Jinchankou_LN	Tibetan_Nagqu	-1.8e-05	0.000929	-0.019	267905
China_Tianyuan	Jinchankou_LN	Tibetan_Nagqu	-3.7e-05	0.001957	-0.019	226505
Sherpa_Nepal	Russia_IA	Tibetan_Nagqu	-1e-05	0.000649	-0.016	389351
Circassian	Sherpa_Nepal	Tibetan_Nagqu	-9e-06	0.000664	-0.014	423155
Ukrainian	Shimao_LN	Tibetan_Nagqu	-1.2e-05	0.000856	-0.014	433561
Sherpa_Nepal	Mongolia_LBA_1_MongunTaiga	Tibetan_Nagqu	-1.4e-05	0.000998	-0.014	181330
Mongol_Uuld	Nepal_Mebrak_2125BP	Tibetan_Nagqu	-9e-06	0.000807	-0.011	278608
Qiang_Danba	Shirenzigou_IA_W	Tibetan_Nagqu	-7e-06	0.000781	-0.009	121857
Mongolia_LBA_4_CenterWest	Nepal_Chokhopani_2700BP	Tibetan_Nagqu	-8e-06	0.000893	-0.009	379996
Shor_Khakassia	Nepal_Chokhopani_2700BP	Tibetan_Nagqu	-9e-06	0.001072	-0.008	390157
Han_Shanghai	Nepal_Samdzong_1500BP	Tibetan_Nagqu	-6e-06	0.000826	-0.007	375199
Sherpa_Nepal	Russia_UstIda_LN	Tibetan_Nagqu	-4e-06	0.000734	-0.006	347848

## Sheet: Table S8
Table S8. Admxiture-f3-statistics of the form f3(Source population1, Source population2; Chamdo Tibetan) showed the admixture signals for high-altitude adaptive Chamdo Tibetan
Source1	Source2	Target	f_3	std.err	Z	SNPs
Tibetan_Lhasa	Tibetan_Yajiang	Tibetan_Chamdo	-0.001017	0.000291	-3.49	401753
Qiang_Danba	Tibetan_Shannan	Tibetan_Chamdo	-0.0009	0.0003	-2.998	400290
Qiang_Danba	Tibetan_Lhasa	Tibetan_Chamdo	-0.000771	0.000285	-2.708	400095
Tibetan_Nagqu	Banlashan_MN	Tibetan_Chamdo	-0.00142	0.000555	-2.557	390032
Qiang_Daofu	Tibetan_Lhasa	Tibetan_Chamdo	-0.00063	0.000279	-2.255	401904
Tibetan_Shannan	Banlashan_MN	Tibetan_Chamdo	-0.001208	0.000591	-2.043	391862
Qiang_Danba	Nepal_Samdzong_1500BP	Tibetan_Chamdo	-0.000874	0.000432	-2.023	394520
Tibetan_Yajiang	Nepal_Samdzong_1500BP	Tibetan_Chamdo	-0.000844	0.000422	-2.001	396083
Tibetan_Lhasa	Mongolia_N_East	Tibetan_Chamdo	-0.001014	0.000518	-1.958	351802
Tibetan_Nagqu	Boshan_EN	Tibetan_Chamdo	-0.00117	0.000646	-1.812	357790
Tibetan_Lhasa	Lajia_LN	Tibetan_Chamdo	-0.00074	0.000434	-1.707	389291
Tibetan_Yajiang	Nepal_Mebrak_2125BP	Tibetan_Chamdo	-0.001111	0.000654	-1.7	271098
Tibetan_Lhasa	Pingliangtai_LN	Tibetan_Chamdo	-0.000779	0.00046	-1.695	394821
Tibetan_Shannan	Bianbian_EN	Tibetan_Chamdo	-0.00114	0.000673	-1.693	266110
Qiang_Daofu	Nepal_Mebrak_2125BP	Tibetan_Chamdo	-0.001022	0.000629	-1.625	272024
Tibetan_Lhasa	Xiaowu_MN	Tibetan_Chamdo	-0.000994	0.000635	-1.566	386685
Tibetan_Shannan	Tibetan_Yajiang	Tibetan_Chamdo	-0.000465	0.000297	-1.565	402072
Qiang_Danba	Sherpa_Nepal	Tibetan_Chamdo	-0.000562	0.000366	-1.537	395436
Tibetan_Lhasa	Banlashan_MN	Tibetan_Chamdo	-0.000788	0.000544	-1.449	391594
Tibetan_Xunhua	Nepal_Mebrak_2125BP	Tibetan_Chamdo	-0.001281	0.000897	-1.429	266673
Tibetan_Shigatse	Tibetan_Yajiang	Tibetan_Chamdo	-0.000413	0.000293	-1.409	402627
Tibetan_Lhasa	Tibetan_Xunhua	Tibetan_Chamdo	-0.000545	0.000387	-1.407	398689
Banlashan_MN	Nepal_Mebrak_2125BP	Tibetan_Chamdo	-0.001939	0.001407	-1.378	259690
Tibetan_Shannan	Mongolia_Chalcolithic_2_Afanasievo	Tibetan_Chamdo	-0.000899	0.000658	-1.367	283825
Tibetan_Nagqu	Bianbian_EN	Tibetan_Chamdo	-0.00088	0.000655	-1.345	264819
Ingushian	Jinchankou_LN	Tibetan_Chamdo	-0.001406	0.00109	-1.29	303264
Tibetan_Shigatse	Bianbian_EN	Tibetan_Chamdo	-0.000821	0.000657	-1.251	266661
Tibetan_Nagqu	Jinchankou_LN	Tibetan_Chamdo	-0.000887	0.000712	-1.246	278297
Tibetan_Nagqu	Taiwan_Gongguan	Tibetan_Chamdo	-0.000863	0.000704	-1.226	253442
Tibetan_Lhasa	Yi_HGDP	Tibetan_Chamdo	-0.00034	0.000281	-1.209	401166
Mongolia_EIA_7_Xiongnu	Nepal_Mebrak_2125BP	Tibetan_Chamdo	-0.00206	0.001715	-1.201	197370
Sherpa_Nepal	TibetanHO_Yunnan	Tibetan_Chamdo	-0.000572	0.00052	-1.101	388673
Bianbian_EN	Nepal_Samdzong_1500BP	Tibetan_Chamdo	-0.001246	0.001133	-1.1	258168
[truncated: 155 more rows]

## Sheet: Table S9
Table S9. Admxiture-f3-statistics of the form f3(Source population1, Source population2; Gannan Tibetan) showed the admixture signals for lowland Gannan Tibetan from Gansu province
[truncated: 14,046 more rows]

[truncated: 11 more sheets: Table S10, Table S11, Table S12, Table S13, Table S14, Table S15, Table S16, Table S17, Table S18, Table S19, Table S20]
